# Supplementary material for: Regioselective one-pot three component synthesis of chiral 2-iminoselenazolines under sonication
Source: Royal Society of Chemistry journal article supplement (doi:10.1039/c5ra18763j), 2015-01-01
Supplement: c5ra18763j1.pdf [file c5ra18763j1.pdf]

## Support Information

# Regioselective One-pot Three Component Synthesis of Chiral 2-Iminoselenazolines by Sonication

Wong-Jin Chang<sup>1</sup>, Manohar V. Kulkarni<sup>1</sup>, and Chung-Ming Sun\*<sup>1,2</sup>

<sup>1</sup>*Department of Applied Chemistry, National Chiao-Tung University, Hsinchu 300-10, Taiwan* <sup>2</sup>*Department of Medicinal and Applied Chemistry, Kaohsiung Medical University, 100, Shih-Chuan 1<sup>st</sup> Road, Kaohsiung, 807-08, Taiwan*

E-mail : [cmsun@mail.nctu.edu.tw](mailto:cmsun@mail.nctu.edu.tw)

|                                                                                             |      |
|---------------------------------------------------------------------------------------------|------|
| 1. General Information.....                                                                 | S3   |
| 2. Experimental procedures.....                                                             | S3   |
| 3. Spectroscopic data.....                                                                  | S6   |
| 4. Copies of the H <sup>1</sup> -NMR, C <sup>13</sup> -NMR, IR, MASS, HPLC<br>Spectra ..... | S23  |
| 5. X-ray data .....                                                                         | S175 |
| 6. References.....                                                                          | S227 |

## General Information

All reactions were performed under an inert atmosphere with unpurified reagents and dry solvents. Analytical thin-layer chromatography (TLC) was performed using 0.25 mm silica gel coated Kieselgel 60 F254 plates. Flash chromatography was performed using the indicated solvent and silica gel 60 (Merck, 230-400 mesh). <sup>1</sup>H NMR (400MHz), <sup>1</sup>H NMR (600 MHz) and <sup>13</sup>C NMR (100 MHz), <sup>13</sup>C NMR (150 MHz) spectra were recorded on a VARIAN VNMRS-600 NMR spectrometer and VARIAN VNMRS-400 NMR spectrometer <sup>1</sup>H NMR (300 MHz) and <sup>13</sup>C NMR (75 MHz) spectra were recorded on a Bruker DRX-300 NMR. Chemical shifts are reported in parts per million (ppm) on the scale from an internal standard. Mass spectra were recorded on an electrospray ionization (Impact HD, EVOQ, Bruker), samples being introduced by infusion method using the electrospray ionization (ESI) technique. High-resolution mass spectra (HRMS) were recorded on a MAT-95XL high resolution mass spectrometer. IR spectra were recorded with a HORIBA FREEXACT-II FT-720 spectrometer and Bruker Tensor 27. Optical rotations are reported as  $[\alpha]_{20}^D$ .

## Materials:

All starting materials were purchased from Alfa, Aldrich and Acros and used directly.

## General Procedure for the Preparation of isoselenocyanates 1a-1f

A mixture of amine (1 eq) and ethyl formate (15ml) was sonicated for 120 minutes (TLC). Excess of ethyl formate was removed on a rotavapor to obtain N-formylaniline. Formation of these intermediates was confirmed by <sup>1</sup>H-NMR. To this compound was added, triphosgene (0.5 eq) and triethyl amine (5 eq). This mixture was refluxed in dichloromethane 10 ml for 8 hrs (TLC). To this solution selenium powder (3 eq) was added and refluxing was continued for further 8 hrs (TLC). The solid was removed by filter paper and solvent was removed by rotavapor and the product was purified by column chromatography. This is a modified procedure from the reported one by reference 1 and reference 2. The following isoselenocyanates 1a and 1f have been prepared. The spectral data for these compounds is in agreement with the reported values in the literature.

## General Procedure for the Preparation of 2-Iminoselenazolines 5a-5l

Chiral aminoester hydrochlorides **2** (1eq) were treated with saturated Sodium bicarbonate solution in water and free base was liberated. This was extracted in dichloromethane, which was removed later on a rotavapor. To the free aminoester **2** was added, isoselenocyanate **1** (1.5eq) and the mixture was sonicated in dry acetonitrile. Time for sonication was 15 min. The reaction was monitored by TLC. To

the reaction mixture was added bromoketone **4** (1.5 eq). And the sonication was continued further. The time for sonication in the second stage Varied between 40 min (TLC). At the end of the reaction, acetonitrile was removed on a rotavapor and the compounds were purified by column chromatography. Compounds prepared by this method along with their spectral data for 2-iminoselenazole **5a-5l** (Scheme1) is as follows:

#### **General Procedure for the Preparation of 2-Iminoselenazolines 7a-7f**

Chiral aminoester hydrochlorides **2** (1eq) were treated with saturated Sodium bicarbonate solution in water and free base was liberated. This was extracted in dichloromethane, which was removed later on a rotavapor. To the free aminoester **2** was added, isoselenocyanate **1** (1.5eq) and the mixture was sonicated in dry acetonitrile. Time for sonication was 15 min. The reaction was monitored by TLC. To the reaction mixture was added bromoketone **6** (1.5 eq). And the sonication was continued further. The time for sonication in the second stage Varied between 90 min (TLC). At the end of the reaction, acetonitrile was removed on a rotavapor and the compounds were purified by column chromatography. Compounds prepared by this method along with their spectral data for 2-iminoselenazole **7a-7f** (Scheme1) is as follows:

#### **General Procedure for the Preparation of 2-Iminoselenazolines 9a-9c**

Chiral aminoester hydrochlorides **2** (1eq) were treated with saturated Sodium bicarbonate solution in water and free base was liberated. This was extracted in dichloromethane, which was removed later on a rotavapor. To the free aminoester **2** was added, isoselenocyanate **1** (1.5eq) and the mixture was sonicated in dry acetonitrile. Time for sonication was 15 min. The reaction was monitored by TLC. To the reaction mixture was added bromoketone **8** (1.5 eq). And the sonication was continued further. The time for sonication in the second stage Varied between 60 min (TLC). At the end of the reaction, acetonitrile was removed on a rotavapor and the compounds were purified by column chromatography. Compounds prepared by this method along with their spectral data for 2-iminoselenazole **9a-9c** (Scheme1) is as follows:

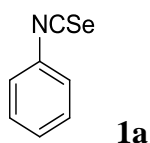

**Isoselenocyanatobenzene (1a)**

See reference 1

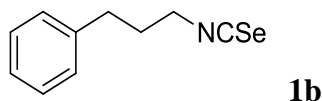

**(3-isoselenocyanatopropyl)benzene (1b)**

$^1\text{H}$  NMR (400 MHz,  $\text{CDCl}_3$ )  $\delta$  7.34-7.31 (m,  $J = 2\text{H}$ ), 7.26-7.18 (m,  $J = 3\text{H}$ ), 3.55 (t,  $J = 6.5$  Hz, 2H), 2.76 (t,  $J = 7.4$  Hz, 2H), 2.12-1.90 (m, 2H);  $^{13}\text{C}$  NMR (100 MHz,  $\text{CDCl}_3$ )  $\delta$  139.4, 128.4, 128.2, 126.2, 44.3, 32.1, 30.6; IR (KBr,  $\nu$ ) 3055, 2947, 2927, 2146, 1453,  $700\text{cm}^{-1}$ ; MS(EI-MS)  $m/z$ : 225; HRMS : calcd for  $\text{C}_{10}\text{H}_{11}\text{NSe}$   $m/z$ : 225.0057; Found : 205.0371

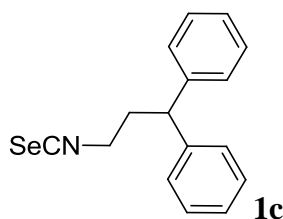

**(3-isoselenocyanatopropane-1,1-diyl)dibenzene (1c)**

$^1\text{H}$  NMR (400 MHz,  $\text{CDCl}_3$ )  $\delta$  7.32-7.29 (m, 4H), 7.25-7.19 (m, 6H), 4.08 (t,  $J = 8.0$  Hz, 1H), 3.51 (t,  $J = 6.6$  Hz, 2H), 2.45 (dt,  $J = 7.9, 6.7$  Hz, 2H);  $^{13}\text{C}$  NMR (100 MHz,  $\text{CDCl}_3$ )  $\delta$  142.6, 128.8, 127.7, 126.8, 47.8, 43.8, 34.9; IR (KBr,  $\nu$ ) 3025, 2922, 2139, 1492, 1450,  $698\text{cm}^{-1}$ ; MS(EI-MS)  $m/z$ : 301; HRMS : calcd for  $\text{C}_{16}\text{H}_{15}\text{NSe}$   $m/z$ : 301.0370; Found : 301.0365

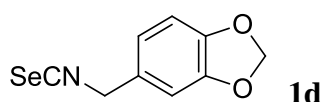

**5-(isoselenocyanatomethyl)benzo[d][1,3]dioxole (1d)**

$^1\text{H}$  NMR (400 MHz,  $\text{CDCl}_3$ )  $\delta$  6.71-6.70 (m, 3H), 5.89 (s, 2H), 4.62 (s, 2H);  $^{13}\text{C}$  NMR (100 MHz,  $\text{CDCl}_3$ )  $\delta$  147.64, 147.33, 126.09, 120.33, 108.00, 107.11, 101.04, 48.51; IR (KBr,  $\nu$ ) 2896, 2137, 1501, 1445, 1251,  $1038\text{cm}^{-1}$ ; MS(EI-MS)  $m/z$ : 241; HRMS :

calcd for C<sub>9</sub>H<sub>7</sub>NO<sub>2</sub>Se m/z: 240.9642; Found : 240.9635

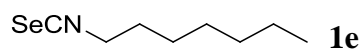

**1-isoselenocyanatoheptane (1e)**

<sup>1</sup>H NMR (400 MHz, CDCl<sub>3</sub>) δ 3.47 (t, *J* = 6.7 Hz, 2H), 1.69-1.48 (m, 2H), 1.36-1.00 (m, 8H), 0.72 (t, *J* = 6.9 Hz, 3H); <sup>13</sup>C NMR (100 MHz, CDCl<sub>3</sub>) δ 45.6, 31.5, 29.5, 28.3, 26.4, 22.4, 14.0; IR (KBr, ν) 2955, 2927, 2857, 2143, 1455, 1344cm<sup>-1</sup>;  
MS(EI-MS) *m/z* : 205; HRMS : calcd for C<sub>8</sub>H<sub>15</sub>NSe m/z: 205.0370; Found : 205.0371

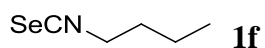

**1-isoselenocyanatobutane (1f)**

See reference 2

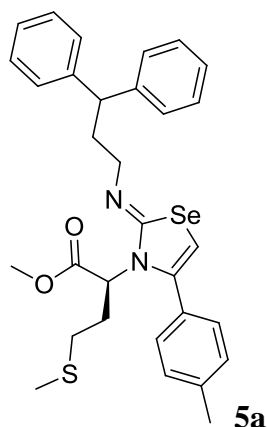

**(S,Z)-methyl**

**2-(2-((3,3-diphenylpropyl)imino)-4-(p-tolyl)-1,3-selenazol-3(2H)-yl)-4-(methylthio)butanoate (5a)**

$^1\text{H NMR}$  (600 MHz,  $\text{CDCl}_3$ )  $\delta$  7.19-7.14 (m, 8H), 7.12-7.10 (m, 2H), 7.04-7.01 (m, 4H), 6.08 (s, 1H), 3.79 (t,  $J = 7.7$  Hz, 1H), 3.76-3.71 (m, 4H), 3.65-3.61 (m, 2H), 2.66-2.62 (m, 1H), 2.60-2.56 (m, 1H), 2.45 (s, 3H), 2.34-2.19 (m, 4H), 2.09 (s, 3H);  $^{13}\text{C NMR}$  (150 MHz,  $\text{CDCl}_3$ )  $\delta$  173.0, 161.0, 144.2, 143.6, 141.6, 138.6, 130.3, 129.2, 128.8, 128.3, 128.2, 127.6, 127.5, 126.0, 94.0, 69.00, 51.9, 48.6, 45.3, 33.3, 33.2, 30.8, 21.3, 15.5; IR (KBr,  $\nu$ ) 3026, 2949, 2918, 1742, 1608, 1451, 1435, 702 $\text{cm}^{-1}$ ; MS (ESI-MS)  $m/z$  : 579 ( $\text{M}+\text{H}$ ) $^+$ ; HRMS : calcd for  $\text{C}_{30}\text{H}_{31}\text{BrN}_2\text{O}_2\text{SSe}$   $m/z$ : 578.1506; Found : 579.1583 ( $\text{M}+\text{H}$ ) $^+$ ;  $[\alpha]_{\text{D}}^{18}$  -67.57 (c 0.03,  $\text{CH}_2\text{Cl}_2$ ); HPLC:  $t_{\text{R}} = 12.344$  min, 9:1hexane/2-propanol, flow: 0.5ml/min. chang500801

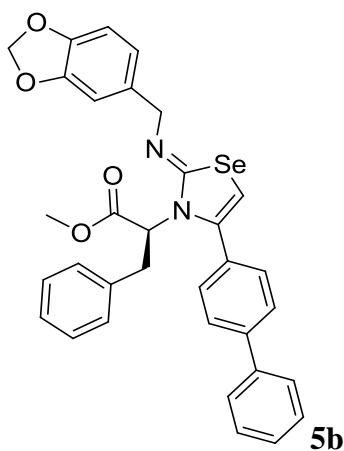

**(S,Z)-methyl**

**2-(4-([1,1'-biphenyl]-4-yl)-2-((benzo[d][1,3]dioxol-5-ylmethyl)imino)-1,3-selenazol-3(2H)-yl)-3-phenylpropanoate (5b)**

$^1\text{H}$  NMR (600 MHz,  $\text{CDCl}_3$ )  $\delta$  7.61-7.55 (m, 2H), 7.53 (d,  $J = 8.0$  Hz, 2H), 7.45-7.43 (m, 2H), 7.36 (t,  $J = 7.4$  Hz, 1H), 7.26-7.17 (m, 7H), 6.56 (d,  $J = 8.0$  Hz, 2H), 6.26 (d,  $J = 7.9$  Hz, 1H), 6.13 (s, 1H), 5.89 (dd,  $J = 4.2, 1.3$  Hz, 2H), 4.99 (d,  $J = 15.1$  Hz, 1H), 4.82 (d,  $J = 15.2$  Hz, 1H), 3.71 (s, 4H), 3.29 (dd,  $J = 13.3, 5.0$  Hz, 1H), 3.11 (d,  $J = 7.6$  Hz, 1H);  $^{13}\text{C}$  NMR (150 MHz,  $\text{CDCl}_3$ )  $\delta$  194.6, 172.6, 161.3, 147.4, 146.4, 146.1, 141.6, 140.1, 139.7, 138.1, 133.9, 131.9, 131.7, 129.5, 129.4, 129.3, 128.9, 128.8, 128.3, 128.2, 127.7, 127.3, 127.2, 127.0, 126.9, 126.3, 120.7, 108.1, 107.7, 100.8, 94.96, 72.3, 51.9, 49.2, 40.1, 28.7; IR (KBr,  $\nu$ ) 3029, 2950, 1740, 1603, 1489, 1445, 1247, 1039,  $699\text{cm}^{-1}$ ; MS (ESI-MS)  $m/z$  : 457 ( $\text{M}+\text{H}$ ) $^+$ ; HRMS : calcd for  $\text{C}_{33}\text{H}_{28}\text{N}_2\text{O}_4\text{Se}$   $m/z$  : 597.1292; Found : 597.1290 ( $\text{M}+\text{H}$ ) $^+$ ;  $[\alpha]_{\text{D}}^{18}$  -217.89 (c 0.04,  $\text{CH}_2\text{Cl}_2$ ); HPLC:  $t_{\text{R}} = 58.344\text{min}$ , 9:1hexane/2-propanol, flow: 0.5ml/min.

chang603201

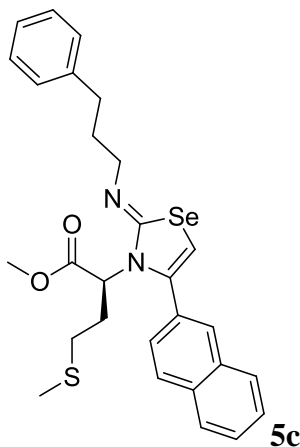

**(S,Z)-methyl**

**4-(methylthio)-2-(4-(naphthalen-2-yl)-2-((3-phenylpropyl)imino)-1,3-selenazol-3(2H)-yl)butanoate (5c)**

$^1\text{H}$  NMR (600 MHz,  $\text{CDCl}_3$ )  $\delta$  7.89-7.78 (m, 4H), 7.55-7.53 (m, 2H), 7.34 (dd,  $J = 8.3, 1.5$  Hz, 1H), 7.02-6.97 (m, 3H), 6.89 (dd,  $J = 7.4, 2.0$  Hz, 1H), 6.19 (s, 1H), 3.88-3.84 (m, 1H), 3.77-3.72 (m, 4H), 3.65-3.63 (m, 1H), 2.66-2.57 (m, 2H), 2.35-2.22 (m, 2H), 2.23-2.20 (m, 2H), 2.10 (s, 3H), 2.03-1.73 (m, 2H);  $^{13}\text{C}$  NMR (150 MHz,  $\text{CDCl}_3$ )  $\delta$  173.0, 161.3, 141.9, 141.1, 133.1, 133.0, 130.7, 128.3, 128.2, 128.1, 128.1, 128.0,

127.8, 126.8, 126.7, 126.1, 125.6, 95.0, 69.2, 52.0, 46.0, 33.3, 32.7, 30.8, 29.1, 15.5;  
 IR (KBr,  $\nu$ ) 3106, 3058, 2948, 2918, 1742, 1612, 1434, 1267, 750, 479 $\text{cm}^{-1}$ ; MS  
 (ESI-MS)  $m/z$  : 539 (M+H)<sup>+</sup>; HRMS : calcd for C<sub>28</sub>H<sub>30</sub>N<sub>2</sub>O<sub>2</sub>SSe  $m/z$ : 538.1193;  
 Found : 539.1274 (M+H)<sup>+</sup> ;  $[\alpha]_{\text{D}}^{18}$  -83.38 ( c 0.03, CH<sub>2</sub>Cl<sub>2</sub>); HPLC:  $t_{\text{R}}$  = 17.646min,  
 9:1hexane/2-propanol, flow: 0.5ml/min. chang501202

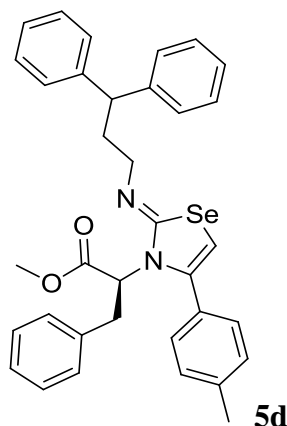

**(S,Z)-methyl**

**2-(2-((3,3-diphenylpropyl)imino)-4-(p-tolyl)-1,3-selenazol-3(2H)-yl)-3-Phenylpropanoate (5d)**

<sup>1</sup>H NMR (600 MHz, CDCl<sub>3</sub>)  $\delta$  7.14-7.11 (m, 2H), 7.07-6.94 (m, 13H), 6.91 (d,  $J$  = 4.0Hz, 2H), 6.83 (d,  $J$  = 3.9Hz, 2H), 5.86 (s, 1H), 3.70-3.63 (m, 2H), 3.61-3.57 (m, 1H), 3.55 (s, 3H), 3.43-3.40 (m, 1H), 3.23-3.19 (m, 1H), 3.07-3.03 (m, 1H), 2.28 (s, 3H), 2.06-1.98 (m, 2H); <sup>13</sup>C NMR (150 MHz, CDCl<sub>3</sub>)  $\delta$  172.9, 160.9, 144.4, 143.8, 141.6, 138.7, 138.3, 130.4, 129.5, 129.3, 128.9, 128.4, 128.4, 128.3, 128.2, 127.7, 126.4, 126.1, 126.0, 94.1, 72.2, 51.9, 48.9, 45.4, 40.2, 33.1, 21.4; IR (KBr,  $\nu$ ) 3027, 2949, 1743, 1603, 1452, 1263, 700 $\text{cm}^{-1}$ ; MS (ESI-MS)  $m/z$  : 595 (M+H)<sup>+</sup>; HRMS : calcd for C<sub>35</sub>H<sub>34</sub>N<sub>2</sub>O<sub>2</sub>Se  $m/z$ : 594.1786; Found : 595.1858 (M+H)<sup>+</sup> ;  $[\alpha]_{\text{D}}^{19}$  -55.93 ( c 0.05, CH<sub>2</sub>Cl<sub>2</sub>); HPLC:  $t_{\text{R}}$  = 16.488min, 9:1hexane/2-propanol, flow: 0.5ml/min.  
 chang609104



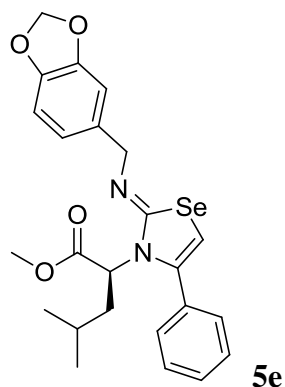

**(S,Z)-methyl**

**2-(2-((benzo[d][1,3]dioxol-5-ylmethyl)imino)-4-phenyl-1,3-selenazol-3(2H)-yl)-4-methylpentanoate (5e)**

$^1\text{H}$  NMR (400 MHz,  $\text{CDCl}_3$ )  $\delta$  7.41-7.28 (m, 3H), 7.19 (dd,  $J = 8.0, 1.4$  Hz, 2H), 6.63 (d,  $J = 1.5$  Hz, 1H), 6.60-6.51 (m, 1H), 6.28 (dd,  $J = 8.0, 1.4$  Hz, 1H), 6.13 (s, 1H), 5.88 (s, 2H), 4.87 (s, 2H), 3.73 (s, 3H), 3.50 (dd,  $J = 9.1, 4.9$  Hz, 1H), 1.83 (ddd,  $J = 14.0, 9.1, 5.2$  Hz, 1H), 1.71 (ddd,  $J = 13.4, 8.7, 4.9$  Hz, 1H), 1.63-1.51 (m, 1H), 0.89 (dd,  $J = 15.9, 6.6$  Hz, 6H);  $^{13}\text{C}$  NMR (100 MHz,  $\text{CDCl}_3$ )  $\delta$  173.7, 160.6, 147.4, 146.3, 141.9, 133.2, 131.9, 129.1, 128.8, 128.3, 120.7, 108.2, 107.6, 100.8, 94.6, 69.1, 51.7, 49.1, 42.8, 24.7, 23.2, 21.8; IR (KBr,  $\nu$ ) 2954, 2869, 1742, 1616, 1490, 1445, 1246, 1039, 701  $\text{cm}^{-1}$ ; MS (ESI-MS)  $m/z$ : 487 ( $\text{M}+\text{H}$ ) $^+$ ;  $[\alpha]_{\text{D}}^{20} +16.60$  (c 0.02,  $\text{CH}_2\text{Cl}_2$ ); HRMS : calcd for  $\text{C}_{24}\text{H}_{27}\text{N}_2\text{O}_4\text{Se}$   $m/z$ : 487.1131 Found : 487.1131 ( $\text{M}+\text{H}$ ) $^+$ ; HPLC:  $t_{\text{R}} = 13.596$ min, 9:1hexane/2-propanol, flow: 0.5ml/min. chang703201

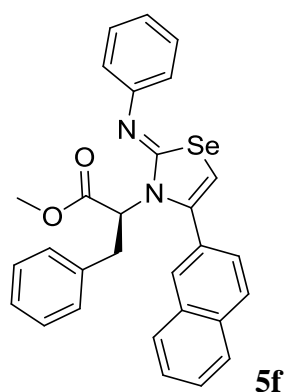

**(S,Z)-methyl**

**2-(4-(naphthalen-2-yl)-2-(phenylimino)-1,3-selenazol-3(2H)-yl)-3-phenylpropanoate (5f)**

$^1\text{H}$  NMR (300 MHz,  $\text{CDCl}_3$ )  $\delta$  7.95-7.83 (m, 1H), 7.80-7.67 (m, 2H), 7.61-7.51 (m, 2H), 7.48 (dd,  $J = 19.3, 11.3$  Hz, 2H), 7.36 (d,  $J = 7.3$  Hz, 1H), 7.29-7.10 (m, 5H), 7.10-6.85 (m, 4H), 6.07-5.85 (m, 1H), 4.65-4.50 (m, 1H), 4.04 (dd,  $J = 13.8, 11.3$  Hz, 1H), 3.92 (s, 3H), 3.25 (dd,  $J = 13.9, 3.7$  Hz, 1H);  $^{13}\text{C}$  NMR (75 MHz,  $\text{CDCl}_3$ )  $\delta$  171.0, 156.8, 152.5, 142.0, 138.1, 133.5, 133.2, 130.3, 130.1, 130.0, 129.4, 129.0, 128.7, 128.4, 128.2, 127.3, 127.1, 127.0, 126.5, 124.1, 121.2, 94.8, 61.6, 53.1, 33.5; IR (KBr,  $\nu$ ) 3058, 3029, 2948, 2927, 1716, 1616, 1585, 1407, 1223, 754,  $698\text{cm}^{-1}$ ; MS (ESI-MS)  $m/z$  : 513 ( $\text{M}+\text{H}$ ) $^+$ ; HRMS : calcd for  $\text{C}_{29}\text{H}_{24}\text{N}_2\text{O}_2\text{Se}$   $m/z$ : 512.1003; Found : 513.1077 ( $\text{M}+\text{H}$ ) $^+$ ;  $[\alpha]_{\text{D}}^{18}$  -80.06 (c 0.04,  $\text{CH}_2\text{Cl}_2$ ); HPLC:  $t_{\text{R}} = 16.444\text{min}$ , 9:1hexane/2-propanol, flow: 0.5ml/min. chang504802

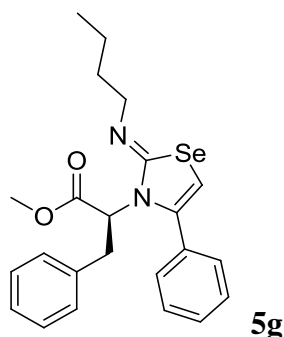

**(S,Z)-methyl**

**2-(2-(butylimino)-4-phenyl-1,3-selenazol-3(2H)-yl)-3-phenylpropanoate (5g)**

$^1\text{H}$  NMR (400 MHz,  $\text{CDCl}_3$ )  $\delta$  7.47-7.35 (m, 3H), 7.35-7.24 (m, 5H), 7.24-7.13 (m, 1H), 6.14-5.98 (m, 1H), 3.95-3.78 (m, 1H), 3.71 (s, 3H), 3.67-3.53 (m, 1H), 3.33 (dd,  $J = 13.4, 5.9$  Hz, 1H), 3.16 (dd,  $J = 13.2, 7.8$  Hz, 1H), 1.48-1.25 (m, 2H), 1.16-0.94 (m, 2H), 0.71 (t,  $J = 7.4$  Hz, 3H);  $^{13}\text{C}$  NMR (100 MHz,  $\text{CDCl}_3$ )  $\delta$  172.7, 161.0, 141.9, 138.2, 133.4, 129.4, 128.8, 128.6, 128.3, 128.0, 126.2, 94.3, 72.2, 51.7, 45.9, 40.0, 29.7, 19.5, 13.5; IR (KBr,  $\nu$ ) 2956, 2931, 1744, 1614, 1443, 1272, 1154,  $700\text{cm}^{-1}$ ; MS (ESI-MS)  $m/z$  : 443 ( $\text{M}+\text{H}$ ) $^+$ ; HRMS : calcd for  $\text{C}_{23}\text{H}_{26}\text{N}_2\text{O}_2\text{Se}$   $m/z$ : 443.1232 ; Found : 443.1234 ( $\text{M}+\text{H}$ ) $^+$ ;  $[\alpha]_{\text{D}}^{20}$  -366.75 (c 0.05,  $\text{CH}_2\text{Cl}_2$ ); HPLC:  $t_{\text{R}} = 15.468\text{min}$ , 9:1hexane/2-propanol, flow: 0.5ml/min. chang705801

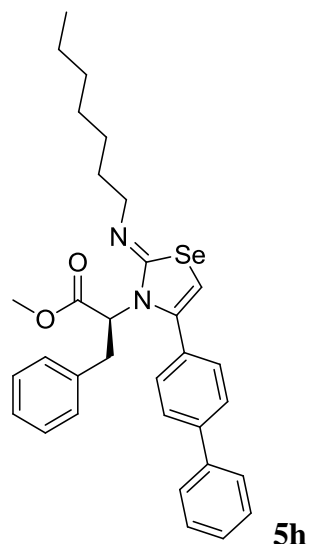

**(S,Z)-methyl**

**2-(4-([1,1'-biphenyl]-4-yl)-2-(heptylimino)-1,3-selenazol-3(2H)-yl)-3-phenylpropanoate (5h)**

$^1\text{H}$  NMR (400 MHz,  $\text{CDCl}_3$ )  $\delta$  7.6-7.60 (m, 4H), 7.52-7.44 (m, 2H), 7.44-7.35 (m, 3H), 7.35-7.16 (m, 5H), 6.12 (s, 1H), 3.96-3.80 (m, 1H), 3.75-3.60 (m, 5H), 3.34 (dd,  $J = 13.4, 5.9$  Hz, 1H), 3.24-3.10 (m, 1H), 1.53-1.36 (m, 2H), 1.27-1.01 (m, 8H), 0.84 (t,  $J = 7.1$  Hz, 3H);  $^{13}\text{C}$  NMR (100 MHz,  $\text{CDCl}_3$ )  $\delta$  172.8, 161.1, 141.8, 141.5, 140.2, 138.3, 129.6, 129.3, 128.9, 128.2, 127.7, 127.1, 127.0, 126.3, 94.6, 72.4, 51.9, 46.4, 40.2, 31.6, 28.7, 27.7, 26.4, 22.6, 14.1; IR (KBr,  $\nu$ ) 3061, 3030, 2952, 2927, 2856, 1745, 1602, 1487, 1435, 1272, 915, 756,  $698\text{cm}^{-1}$ ; MS (ESI-MS)  $m/z$ : 561(M+H) $^+$ ; HRMS calcd for  $\text{C}_{32}\text{H}_{37}\text{N}_2\text{O}_2\text{Se}$   $m/z$ : 561.2015 Found : 561.2022 (M+H) $^+$ ;  $[\alpha]_{\text{D}}^{20} +30.88$  (c 0.03,  $\text{CH}_2\text{Cl}_2$ ); HPLC:  $t_{\text{R}} = 18.924\text{min}$ , 9:1hexane/2-propanol, flow: 0.5ml/min. chang705601

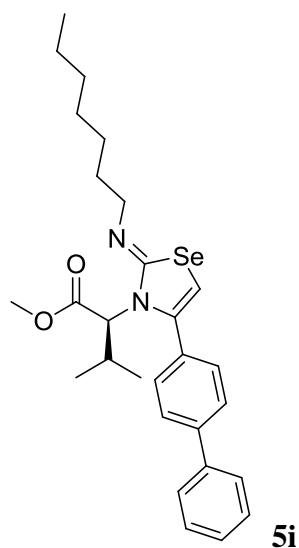

**(S,Z)-methyl**

**2-(4-([1,1'-biphenyl]-4-yl)-2-(heptylimino)-1,3-selenazol-3(2H)-yl)-3-methylbutanoate (5i)**

$^1\text{H}$  NMR (400 MHz,  $\text{CDCl}_3$ )  $\delta$  7.73-7.55 (m, 4H), 7.53-7.32 (m, 5H), 6.13 (s, 1H), 3.97-3.84 (m, 1H), 3.74 (s, 3H), 3.70-3.57 (m, 1H), 3.18 (d,  $J = 6.2$  Hz, 1H), 2.32 (dd,  $J = 13.1, 6.6$  Hz, 1H), 1.59-1.37 (m, 2H), 1.32-0.95 (m, 8H), 0.81 (t,  $J = 7.0$  Hz, 3H);  $^{13}\text{C}$  NMR (100 MHz,  $\text{CDCl}_3$ )  $\delta$  173.1, 160.3, 141.9, 141.5, 140.2, 132.6, 129.3, 129.0, 128.9, 127.7, 127.2, 127.1, 127.0, 94.3, 77.4, 77.3, 77.0, 76.7, 51.7, 46.4, 32.8, 31.5, 29.7, 28.7, 27.9, 26.4, 22.5, 19.7, 18.7, 14.0; IR (KBr,  $\nu$ ) 3031, 2956, 2928, 2856, 1745, 1720, 1604, 1488, 1372, 1273, 1298, 847, 759,  $698\text{cm}^{-1}$ ; MS (ESI-MS)  $m/z$  : 513 ( $\text{M}+\text{H}$ ) $^+$ ; HRMS : calcd for  $\text{C}_{28}\text{H}_{37}\text{N}_2\text{O}_2\text{Se}$   $m/z$ : 513.2015 Found : 513.2021 ( $\text{M}+\text{H}$ ) $^+$ ;  $[\alpha]_{\text{D}}^{20}$  -57.35 (c 0.01,  $\text{CH}_2\text{Cl}_2$ ); HPLC:  $t_{\text{R}} = 9.524\text{min}$ , 9:1hexane/2-propanol, flow: 0.5ml/min. chang705501

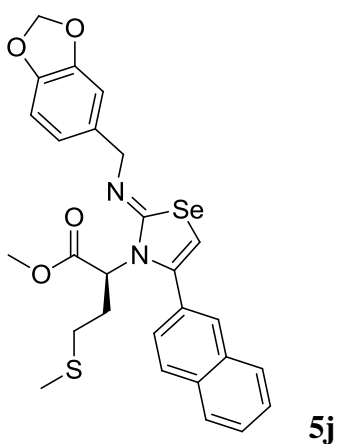

**(S,Z)-methyl**

**2-(2-((benzo[d][1,3]dioxol-5-yl)methyl)imino)-4-(naphthalen-2-yl)-1,3-selenazol-3(2H)-yl)-4-(methylthio)butanoate (5j)**

$^1\text{H}$  NMR (400 MHz,  $\text{CDCl}_3$ )  $\delta$  7.89-7.73 (m, 3H), 7.71 (s, 1H), 7.57-7.45 (m, 2H), 7.28 (dd,  $J = 8.4, 1.7$  Hz, 1H), 6.69 (d,  $J = 1.6$  Hz, 1H), 6.57 (d,  $J = 8.0$  Hz, 1H), 6.29 (dd,  $J = 7.9, 1.5$  Hz, 1H), 6.26 (s, 1H), 5.88 (s, 2H), 5.01-4.77 (m, 2H), 3.76 (s, 3H), 3.66 (dd,  $J = 7.9, 4.9$  Hz, 1H), 2.56-2.36 (m, 2H), 2.26-2.12 (m, 2H), 2.07 (s, 3H);  $^{13}\text{C}$  NMR (100 MHz,  $\text{CDCl}_3$ )  $\delta$  172.9, 161.5, 147.5, 146.4, 141.9, 133.1, 132.8, 131.7, 130.36, 128.6, 128.1, 128.0, 127.7, 126.8, 126.6, 126.2, 120.5, 108.0, 107.6, 100.8, 95.3, 68.9, 52.0, 49.4, 33.1, 30.5, 15.4; IR (KBr,  $\nu$ ) 3108, 3056, 2949, 2915, 1739, 1614, 1502, 1489, 1444, 1246, 1039,  $936, 479\text{cm}^{-1}$ ; MS (ESI-MS)  $m/z$  : 555 ( $\text{M}+\text{H}$ ) $^+$ ; HRMS : calcd for  $\text{C}_{27}\text{H}_{26}\text{N}_2\text{O}_4\text{SSe}$   $m/z$ : 555.0851 Found : 555.0863( $\text{M}+\text{H}$ ) $^+$ ;

$[\alpha]_D^{21} -77.40$  (c 0.01,  $\text{CH}_2\text{Cl}_2$ ); HPLC:  $t_R = 29.064\text{min}$ , 9:1hexane/2-propanol, flow: 0.5ml/min. chang703001 \*

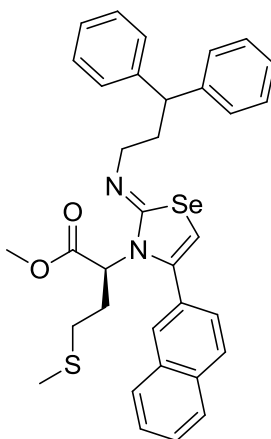

**5k**

**(S,Z)-methyl**

**2-((3,3-diphenylpropyl)imino)-4-(naphthalen-2-yl)-1,3-selenazol-3(2H)-yl)-4-(methylthio)butanoate (5k)**

$^1\text{H}$  NMR (400 MHz,  $\text{CDCl}_3$ )  $\delta$  7.90 (dd,  $J = 11.5, 4.3$  Hz, 1H), 7.87-7.75 (m, 3H), 7.63-7.56 (m, 2H), 7.30 (dt,  $J = 12.9, 6.5$  Hz, 2H), 7.02-6.83 (m, 9H), 6.21 (s, 1H), 3.85-3.71 (m, 4H), 3.71-3.58 (m, 2H), 2.72-2.52 (m, 2H), 2.39-2.17 (m, 4H), 2.10 (s, 3H);  $^{13}\text{C}$  NMR (100 MHz,  $\text{CDCl}_3$ )  $\delta$  173.0, 161.0, 144.1, 143.4, 141.6, 133.2, 133.0, 130.6, 128.4, 128.3, 128.2, 128.2, 128.1, 127.8, 127.5, 127.4, 126.9, 126.7, 126.1, 126.0, 94.9, 77.3, 77.0, 76.7, 69.1, 52.0, 48.6, 45.5, 33.3, 30.8, 15.5; IR (KBr,  $\nu$ ) 3105, 3058, 2950, 2923, 1740, 1612, 1261, 1031, 751, 702,  $479\text{cm}^{-1}$ ; MS (ESI-MS)  $m/z$  : 615 ( $\text{M}+\text{H}$ ) $^+$ ; HRMS : calcd for  $\text{C}_{34}\text{H}_{34}\text{N}_2\text{O}_2\text{SSe}$   $m/z$ : 614.1579 Found : 615.1598( $\text{M}+\text{H}$ ) $^+$ ;  $[\alpha]_D^{20} -689.50$  (c 0.01,  $\text{CH}_2\text{Cl}_2$ ); HPLC:  $t_R = 19.716\text{min}$ , 9:1hexane/2-propanol, flow: 0.5ml/min. chang706301

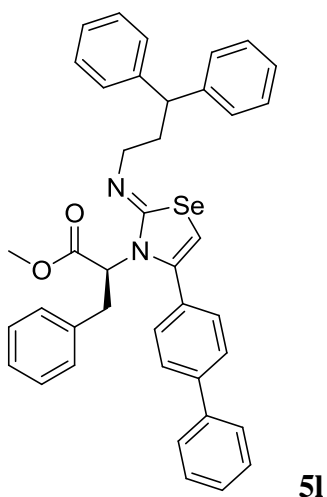

**(S,Z)-methyl**

**2-(4-([1,1'-biphenyl]-4-yl)-2-((3,3-diphenylpropyl)imino)-1,3-selenazol-3(2H)-yl)-3-phenylpropanoate (5l)**

$^1\text{H}$  NMR (400 MHz,  $\text{CDCl}_3$ )  $\delta$  7.67 (dd,  $J = 5.1, 3.3$  Hz, 2H), 7.60-7.47 (m, 4H), 7.47-7.37 (m, 1H), 7.34-7.23 (m, 4H), 7.23-7.01 (m, 9H), 7.01-6.87 (m, 2H), 6.11 (s, 1H), 3.95-3.78 (m, 2H), 3.72 (s, 3H), 3.65-3.51 (m, 1H), 3.35 (dd,  $J = 13.5, 5.6$  Hz, 1H), 3.19 (dd,  $J = 13.5, 8.0$  Hz, 1H), 2.27-2.12 (m, 2H);  $^{13}\text{C}$  NMR (100 MHz,  $\text{CDCl}_3$ )  $\delta$  172.8, 160.8, 144.2, 143.6, 141.5, 141.2, 140.2, 138.2, 132.0, 129.4, 129.2, 128.9, 128.3, 128.3, 128.1, 127.7, 127.5, 127.5, 127.1, 127.0, 126.2, 126.0, 126.0, 94.6, 72.2, 51.9, 48.7, 45.3, 40.1, 33.0; MS (ESI-MS)  $m/z$  : 657 ( $\text{M}+\text{H}$ ) $^+$ ; IR (KBr,  $\nu$ ) HRMS : calcd for  $\text{C}_{40}\text{H}_{37}\text{N}_2\text{O}_2\text{Se}$   $m/z$  : 657.2015 Found : 657.2024 ( $\text{M}+\text{H}$ ) $^+$  ; HPLC:  $t_{\text{R}} = 30.432$  min, 9:1hexane/2-propanol, flow: 0.5ml/min. chang704201 \*

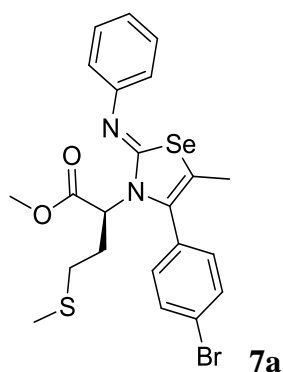

**(S,Z)-methyl**

**2-(4-(4-bromophenyl)-5-methyl-2-(phenylimino)-1,3-selenazol-3(2H)-yl)-4-(methylthio)butanoate (7a)**

$^1\text{H}$  NMR (600 MHz,  $\text{CDCl}_3$ )  $\delta$  7.61 (t,  $J = 7.0$  Hz, 2H), 7.34-7.24 (m, 3H), 7.18 (d,  $J = 8.0$  Hz, 1H), 7.08-7.02 (m, 1H), 6.96 (dd,  $J = 8.2, 0.9$  Hz, 2H), 4.34 (s, 1H), 3.77 (s, 3H), 2.66 (d,  $J = 8.7$  Hz, 1H), 2.45-2.37 (m, 2H), 2.34-2.24 (m, 1H), 1.99 (overlap s, 6H);  $^{13}\text{C}$  NMR (150 MHz,  $\text{CDCl}_3$ )  $\delta$  170.7, 152.0, 134.4, 132.3, 132.1, 131.9, 130.3, 129.4, 123.6, 123.4, 120.6, 58.5, 52.5, 30.7, 27.5, 15.2, 15.2; IR (KBr,  $\nu$ ) 3057, 3028, 2949, 2916, 1745, 1606, 1579, 1489, 1331, 1230, 1070, 1011, 833, 696,  $517\text{cm}^{-1}$ ; MS (ESI-MS)  $m/z$  : 539 ( $\text{M}+\text{H}$ ) $^+$ ; HRMS : calcd for  $\text{C}_{22}\text{H}_{23}\text{BrN}_2\text{O}_2\text{SSe}$   $m/z$ : 537.9829; Found : 538.9912 ( $\text{M}+\text{H}$ ) $^+$ ;  $[\alpha]_{\text{D}}^{21}$  -108.9 (c 0.01,  $\text{CH}_2\text{Cl}_2$ ); HPLC:  $t_{\text{R}} = 21.06\text{min}$ , 9:1hexane/2-propanol, flow: 0.5ml/min. chang501601

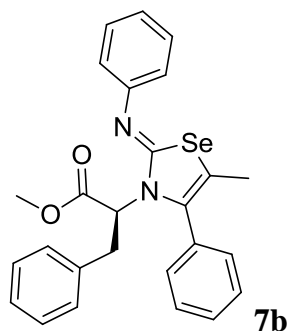

**(S,Z)-methyl**

**2-(5-methyl-4-phenyl-2-(phenylimino)-1,3-selenazol-3(2H)-yl)-3-phenylpropanoate (7b)**

$^1\text{H}$  NMR (300 MHz,  $\text{CDCl}_3$ )  $\delta$  7.48-7.21 (m, 9H), 7.12 (t,  $J = 11.5$  Hz, 4H), 7.00 (dd,  $J = 10.5, 7.3$  Hz, 2H), 5.90 (d,  $J = 7.5$  Hz, 1H), 4.28 (dd,  $J = 10.8, 3.8$  Hz, 1H), 3.97 (dd,  $J = 13.7, 11.0$  Hz, 1H), 3.85 (d,  $J = 7.5$  Hz, 3H), 3.25 (dd,  $J = 13.8, 3.8$  Hz, 1H), 1.87 (s, 3H);  $^{13}\text{C}$  NMR (75 MHz,  $\text{CDCl}_3$ )  $\delta$  171.3, 156.2, 152.8, 138.5, 136.3, 131.6, 131.3, 130.4, 130.2, 129.9, 129.2, 128.8, 127.0, 123.8, 121.2, 106.4, 78.0, 77.5, 77.1, 61.9, 52.9, 33.6, 15.4; IR (KBr,  $\nu$ ) 3060, 3028, 1720, 1581, 1396, 1070, 1011,  $760, 700\text{cm}^{-1}$ ; MS (ESI-MS)  $m/z$  : 477 ( $\text{M}+\text{H}$ ) $^+$ ; HRMS : calcd for  $\text{C}_{26}\text{H}_{24}\text{N}_2\text{O}_2\text{Se}$   $m/z$ : 477.1081; Found : 477.1083 ( $\text{M}+\text{H}$ ) $^+$ ;  $[\alpha]_{\text{D}}^{20}$  +368.4 (c 0.05,  $\text{CH}_2\text{Cl}_2$ ); HPLC:  $t_{\text{R}} = 10.22\text{min}$ , 9:1hexane/2-propanol, flow: 0.5ml/min. chang501801

7c

**(S,Z)-methyl**

**2-(2-(butylimino)-5-methyl-4-phenyl-1,3-selenazol-3(2H)-yl)-3-phenylpropanoate (7c)**

$^1\text{H}$  NMR (400 MHz,  $\text{CDCl}_3$ )  $\delta$  7.48-7.33 (m, 3H), 7.33-7.12 (m, 7H), 3.77-3.60 (m, 4H), 3.47-3.35 (m, 1H), 3.31 (dd,  $J = 13.4, 5.9$  Hz, 1H), 3.14 (dd,  $J = 13.2, 7.8$  Hz, 1H), 1.97 (s, 3H), 1.46-1.22 (m, 2H), 1.11-0.94 (m, 2H), 0.69 (t,  $J = 7.4$  Hz, 3H);  $^{13}\text{C}$  NMR (100 MHz,  $\text{CDCl}_3$ )  $\delta$  172.8, 160.0, 138.3, 136.1, 132.0, 130.1, 129.4, 128.6, 128.4, 128.3, 128.0, 126.1, 106.5, 72.4, 51.7, 46.1, 40.1, 29.8, 19.5, 14.8, 13.5; IR (KBr,  $\nu$ ) 3028, 2956, 2871, 1744, 1614, 1443, 1272, 1154,  $700\text{cm}^{-1}$ ; MS (ESI-MS)  $m/z$ : 457 ( $\text{M}+\text{H}$ ) $^+$ ; HRMS: calcd for  $\text{C}_{24}\text{H}_{29}\text{N}_2\text{O}_2\text{Se}$   $m/z$ : 457.1389; Found: 457.1397 ( $\text{M}+\text{H}$ ) $^+$ ;  $[\alpha]_{\text{D}}^{19} -81.18$  (c 0.04,  $\text{CH}_2\text{Cl}_2$ ); HPLC:  $t_{\text{R}} = 15.468\text{min}$ , 9:1hexane/2-propanol, flow: 0.5ml/min. chang705701

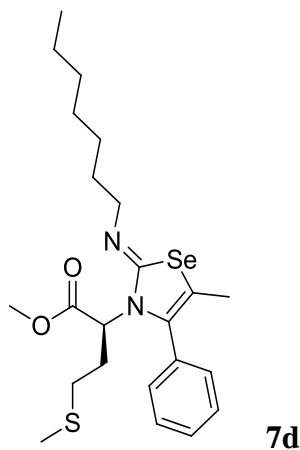

**(S,Z)-methyl**

**2-(2-(heptylimino)-5-methyl-4-phenyl-1,3-selenazol-3(2H)-yl)-4-(methylthio)butanoate (7d)**

$^1\text{H}$  NMR (400 MHz,  $\text{CDCl}_3$ )  $\delta$  7.46-7.28 (m, 3H), 7.19 (d,  $J = 6.5$  Hz, 2H), 3.67 (s, 3H), 3.63-3.52 (m, 2H), 3.42-3.35 (m, 1H), 2.62-2.49 (m, 2H), 2.20-2.09 (m, 2H),



2.05 (s, 3H), 1.94 (m, 3H), 1.45-1.32 (m, 2H), 1.16-0.96 (m, 8H), 0.77 (t,  $J = 7.1$  Hz, 3H);  $^{13}\text{C}$  NMR (100 MHz,  $\text{CDCl}_3$ )  $\delta$  173.0, 160.2, 136.0, 131.9, 130.00, 128.5, 128.4, 128.3, 106.5, 69.1, 51.7, 46.2, 33.1, 31.3, 30.6, 28.4, 27.5, 26.2, 22.3, 15.3, 14.7, 13.8; IR (KBr,  $\nu$ ) 2952, 2925, 2855, 1743, 1633, 1601, 1435, 1271, 1157, 777, 707 $\text{cm}^{-1}$ ; MS (ESI-MS)  $m/z$  : 483 ( $\text{M}+\text{H}$ ) $^+$ ; HRMS : calcd for  $\text{C}_{23}\text{H}_{35}\text{N}_2\text{O}_2\text{SSe}$   $m/z$ : 483.1579 Found : 483.1582 ( $\text{M}+\text{H}$ ) $^+$ ;  $[\alpha]_D^{20}$  -24.08 (  $c$  0.03,  $\text{CH}_2\text{Cl}_2$ ); HPLC:  $t_R = 8.696$ min, 9:1hexane/2-propanol, flow: 0.5ml/min. Chang705201

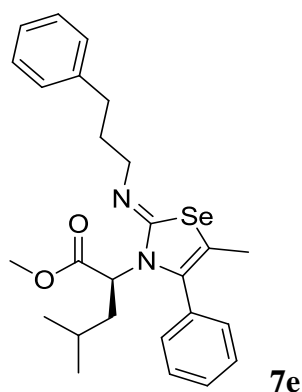

**(S,Z)-methyl  
4-methyl-2-(5-methyl-4-phenyl-2-((3-phenylpropyl)imino)-1,3-selenazol-3(2H)-yl)  
pentanoate (7e)**

$^1\text{H}$  NMR (400 MHz,  $\text{CDCl}_3$ )  $\delta$  7.47-7.31 (m, 2H), 7.31-7.07 (m, 4H), 7.02-6.88 (m, 2H), 3.72 (s, 4H), 3.53-3.49 (m, 2H), 2.40 (dd,  $J = 15.1, 7.7$  Hz, 2H), 2.00 (s, 3H), 1.94-1.66 (m, 5H), 0.96 (dd,  $J = 21.5, 4.5$  Hz, 6H);  $^{13}\text{C}$  NMR (100 MHz,  $\text{CDCl}_3$ )  $\delta$  173.9, 159.4, 141.5, 136.0, 132.0, 130.1, 128.5, 128.1, 128.0, 125.5, 106.5, 69.4, 51.8, 46.1, 43.0, 32.7, 29.2, 24.9, 23.2, 21.9, 14.9; IR (KBr,  $\nu$ ) 3084, 2953, 2888, 1744, 1634, 1603, 1451, 1271, 700 $\text{cm}^{-1}$ ; MS (ESI-MS)  $m/z$  : 485 ( $\text{M}+\text{H}$ ) $^+$ ; HRMS : calcd for  $\text{C}_{26}\text{H}_{32}\text{N}_2\text{O}_2\text{Se}$   $m/z$ : 485.1702 Found : 485.1704 ( $\text{M}+\text{H}$ ) $^+$ ;  $[\alpha]_D^{20}$  -68.63 (  $c$  0.04,  $\text{CH}_2\text{Cl}_2$  ); HPLC:  $t_R = 9.321$ min, 9:1hexane/2-propanol, flow: 0.5ml/min. Chang704901

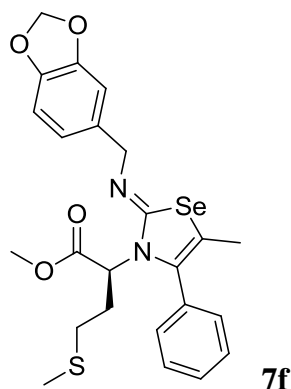

**(S,Z)-methyl**

**2-(2-((benzo[d][1,3]dioxol-5-ylmethyl)imino)-5-methyl-4-phenyl-1,3-selenazol-3(2H)-yl)-4-(methylthio)butanoate (7f)**

$^1\text{H}$  NMR (400 MHz,  $\text{CDCl}_3$ )  $\delta$  7.47-7.27 (m, 3H), 7.06 (s, 2H), 6.59-6.53 (m, 2H), 6.21 (dd,  $J = 8.0, 1.4$  Hz, 1H), 5.85 (s, 2H), 4.71 (s, 2H), 3.72 (s, 3H), 3.60 (dd,  $J = 8.1, 4.8$  Hz, 1H), 2.58-2.33 (m, 2H), 2.19-2.06 (m, 2H), 2.05 (s, 3H), 1.97 (s, 3H);  $^{13}\text{C}$  NMR (100 MHz,  $\text{CDCl}_3$ )  $\delta$  173.0, 160.7, 147.2, 146.2, 135.8, 131.9, 131.4, 130.3, 128.5, 128.2, 120.3, 107.9, 107.4, 107.2, 100.6, 69.0, 51.8, 49.1, 33.0, 30.5, 15.3, 14.8; IR (KBr,  $\nu$ ) 3057, 2949, 2914, 1740, 1601, 1489, 1444, 1246, 1039,  $479\text{cm}^{-1}$ ; MS (ESI-MS)  $m/z$  : 519 ( $\text{M}+\text{H}$ ) $^+$ ; HRMS : calcd for  $\text{C}_{24}\text{H}_{26}\text{N}_2\text{O}_4\text{SSe}$   $m/z$ : 519.0851 Found : 519.0855 ( $\text{M}+\text{H}$ ) $^+$ ;  $[\alpha]_{\text{D}}^{20}$  -76.94 (c 0.04,  $\text{CH}_2\text{Cl}_2$ ); HPLC:  $t_{\text{R}} = 15.924\text{min}$ , 9:1hexane/2-propanol, flow: 0.5ml/min. Chang702901

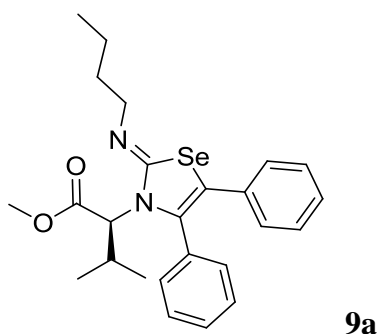

**(S,Z)-methyl**

**2-(2-(butylimino)-4,5-diphenyl-1,3-selenazol-3(2H)-yl)-3-methylbutanoate (9a)**

$^1\text{H}$  NMR (400 MHz,  $\text{CDCl}_3$ )  $\delta$  7.38-7.34 (m, 3H), 7.28-7.26 (m, 2H), 7.08-7.00 (m, 3H), 6.93-6.91 (m, 2H), 3.83-3.76 (m, 1H), 3.74 (s, 3H), 3.55-3.47 (m, 1H), 3.26 (d,  $J = 6.2$  Hz, 1H), 2.39-2.31 (m, 1H), 1.60-1.48 (m, 2H), 1.17-1.07 (m, 2H), 1.03 (t,  $J = 7.3$ , 6H), 0.73 (t,  $J = 7.4$  Hz, 3H);  $^{13}\text{C}$  NMR (100 MHz,  $\text{CDCl}_3$ )  $\delta$  172.9, 158.3, 136.4, 134.5, 132.4, 130.4, 129.6, 128.6, 128.5, 128.3, 127.8, 125.9, 110.4, 76.5, 51.4, 45.9,

32.5, 29.9, 19.5, 19.5, 18.4, 13.4; IR (KBr,  $\nu$ ) 3057, 3022, 2959, 2932, 1744, 1619, 1465, 1380, 1300, 1253, 1170, 1026, 757, 696 $\text{cm}^{-1}$ ; MS(ESI-MS)  $m/z$ : 471(M+H) $^{+}$ ; HRMS : calcd for  $\text{C}_{25}\text{H}_{31}\text{N}_2\text{O}_2\text{Se}$   $m/z$ : 471.1545 ; Found : 471.1549(M+H) $^{+}$ ;  $[\alpha]_{\text{D}}^{19}$  -13.45 (  $c$  0.01,  $\text{CH}_2\text{Cl}_2$  ); HPLC:  $t_{\text{R}}$  = 8.200min, 9:1hexane/2-propanol, flow: 0.5ml/min. chang706001

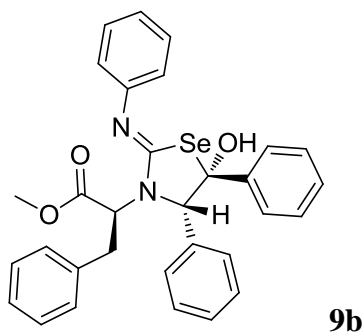

**(S)-methyl**

**2-((4S,5S,Z)-5-hydroxy-4,5-diphenyl-2-(phenylimino)-1,3-selenazolidin-3-yl)-3-phenylpropanoate (9b)**

$^1\text{H}$  NMR (300 MHz,  $\text{CDCl}_3$ )  $\delta$  7.43-7.34 (m, 2H), 7.34-7.23 (m, 4H), 7.23-7.06 (m, 10H), 7.06-6.96 (m, 4H), 6.03 (s, 1H), 5.16 (s, 1H), 3.87-3.80 (m, 4H), 3.75-3.69 (m, 1H), 3.47 (dd,  $J$  = 13.6, 6.2 Hz, 1H);  $^{13}\text{C}$  NMR (75 MHz,  $\text{CDCl}_3$ )  $\delta$  174.6, 156.0, 151.7, 139.4, 138.7, 133.3, 130.5, 130.0, 129.0, 128.3, 128.3, 128.2, 127.8, 127.6, 126.5, 124.0, 121.2, 95.9, 62.5, 56.7, 53.1, 35.4; IR (KBr,  $\nu$ ) 3330, 3060, 3029, 2951, 2849, 1707, 1627, 1591, 1489, 1448, 1266, 1216, 698 $\text{cm}^{-1}$ ; MS (ESI-MS)  $m/z$ : 539 (M+H) $^{+}$ ; HRMS : calcd for  $\text{C}_{31}\text{H}_{28}\text{N}_2\text{O}_3\text{Se}$   $m/z$ : 577.1343; Found : 577.1346 (M+H) $^{+}$ ;  $[\alpha]_{\text{D}}^{21}$  -78.50 (  $c$  0.01,  $\text{CH}_2\text{Cl}_2$  ); HPLC:  $t_{\text{R}}$  = 17.6487min, 9:1hexane/2-propanol, flow: 0.5ml/min. chang505101

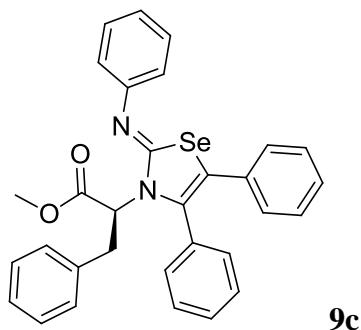

**(S,Z)-methyl**

**2-(4,5-diphenyl-2-(phenylimino)-1,3-selenazol-3(2H)-yl)-3-phenylpropanoate (9c)**

# Copies of the NMR spectra

600201\_20130109\_01

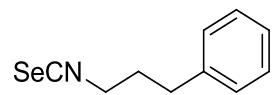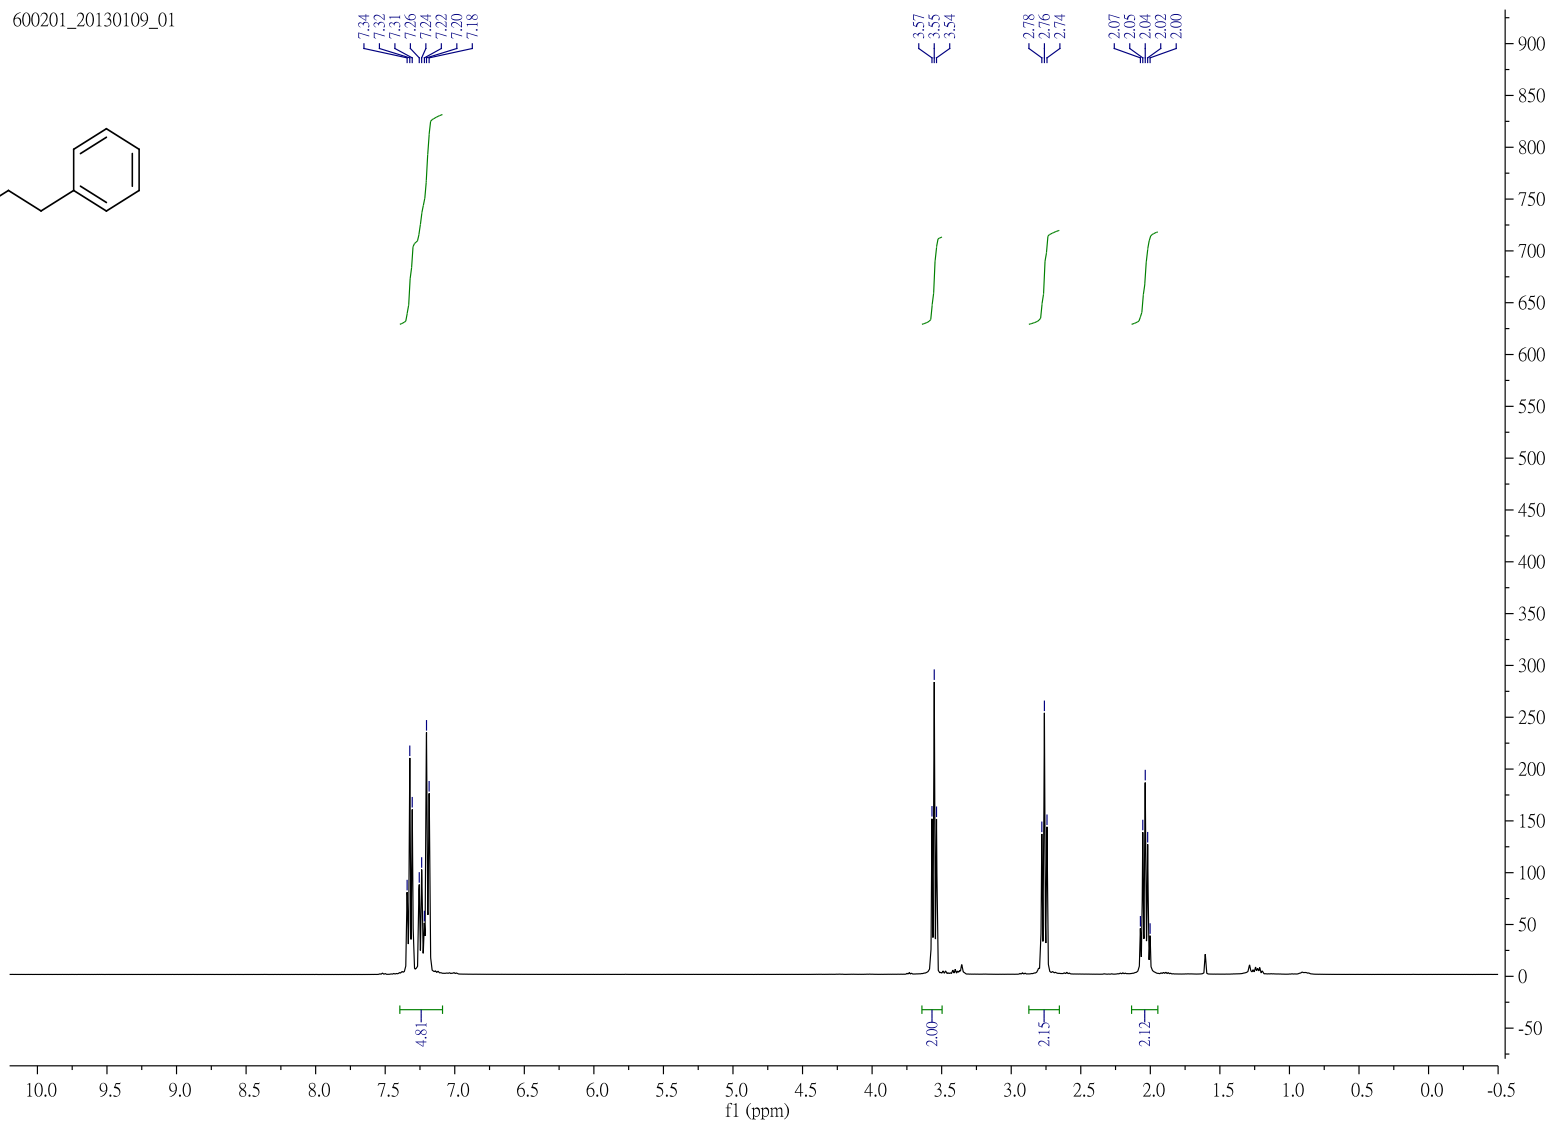

### 1b $^1\text{H-NMR}$

600201\_20130109\_02

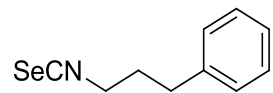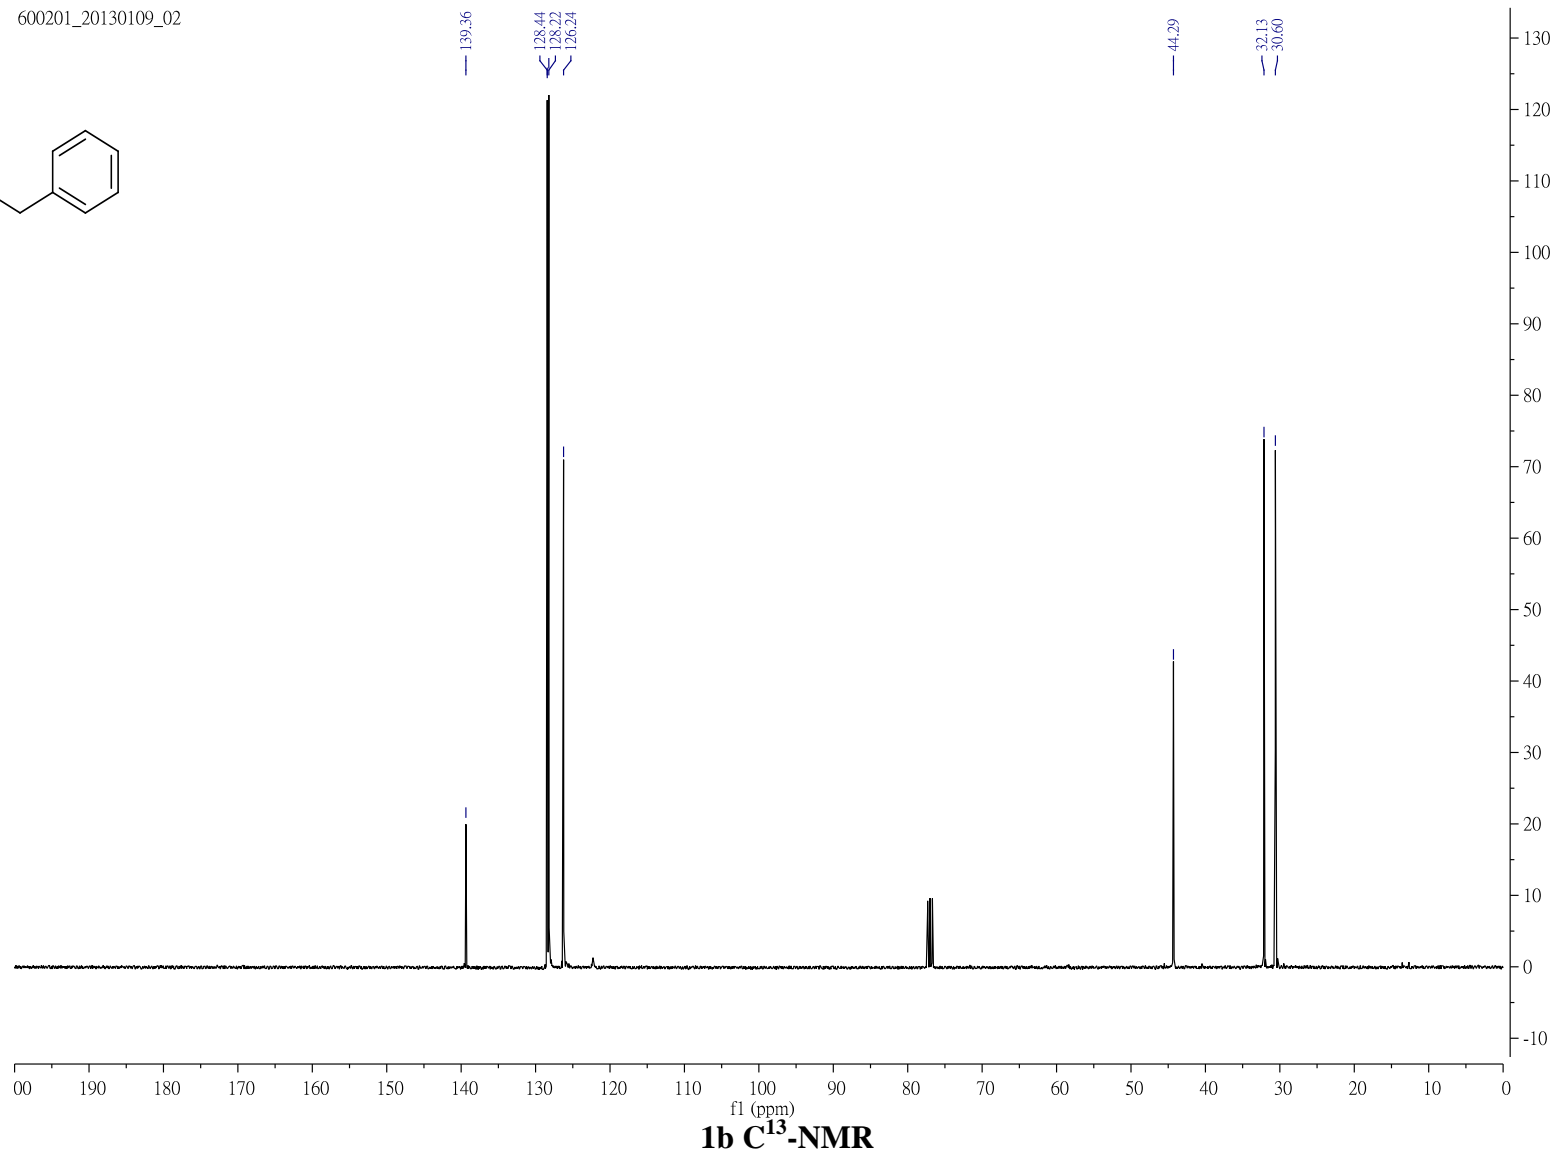

chang603701

102053120 14 (0.983) Cn (Cen,4, 80.00, Ht); Sm (SG, 4x1.00); Sb (2,20.00)

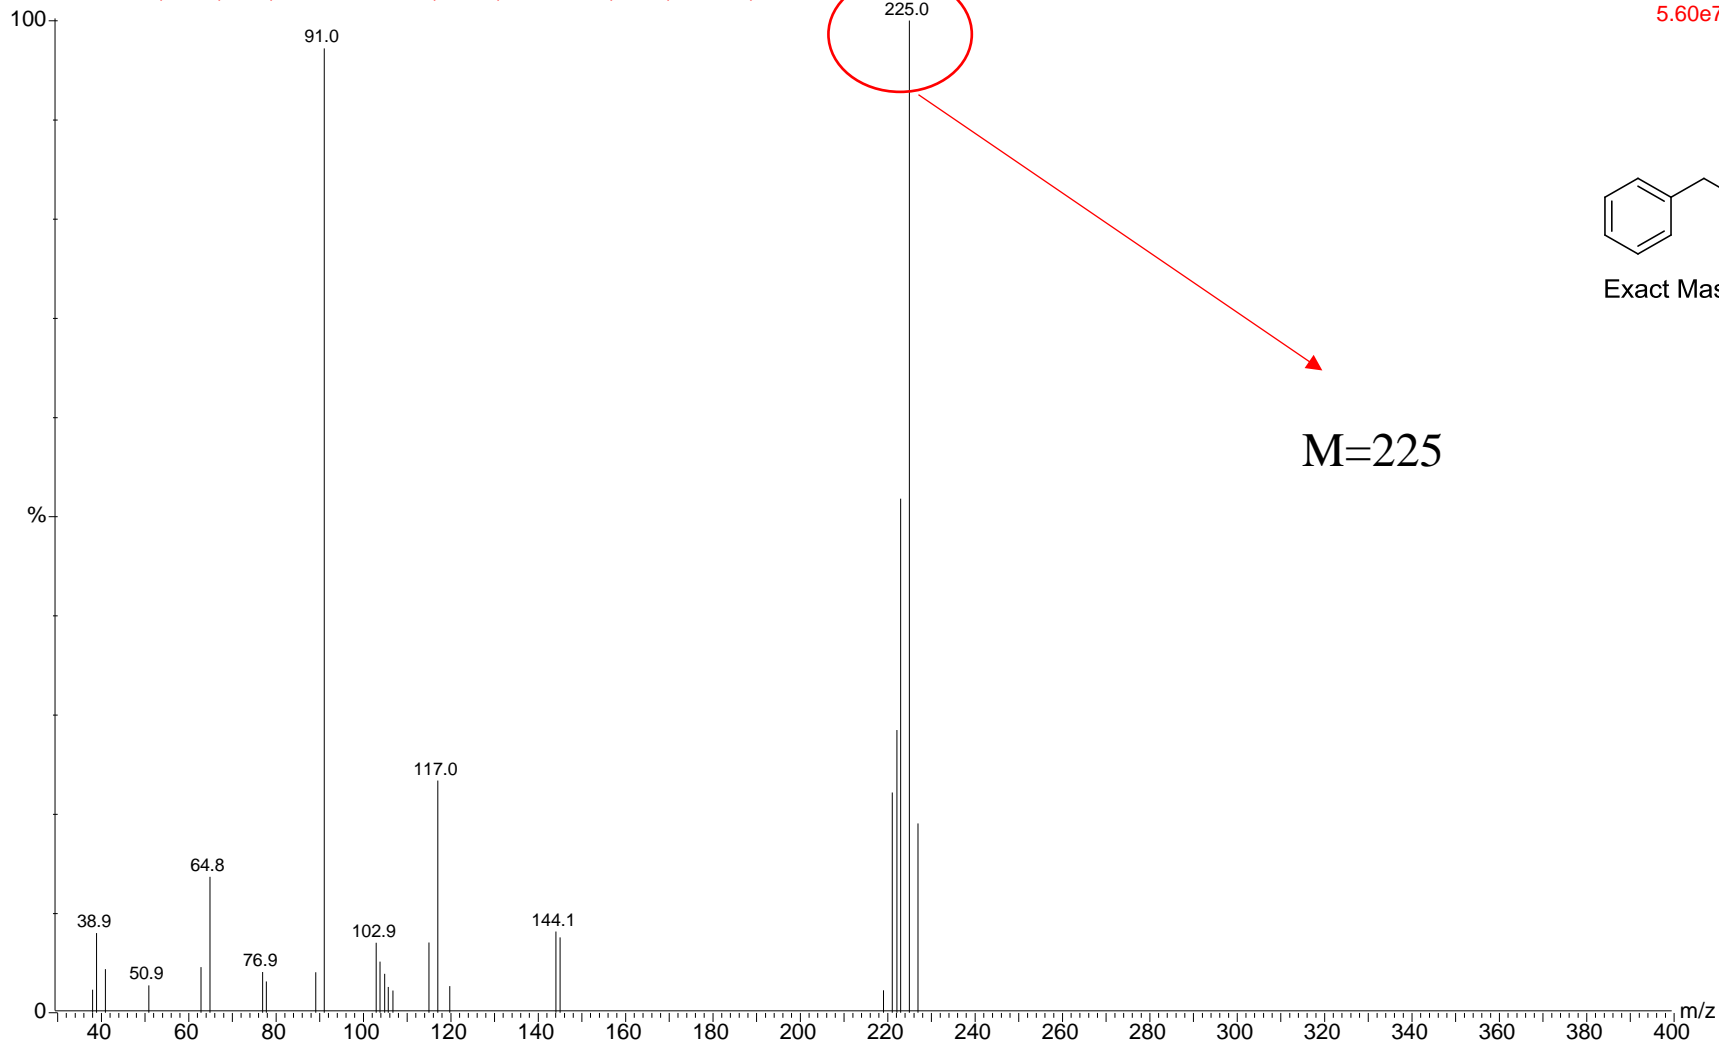

1b LR-MS

S23

2eihr-29-c1 #1 RT: 0,04 AV: 1 NL: 8,49E6  
T: + c EI Full ms [ 159,50-245,50]

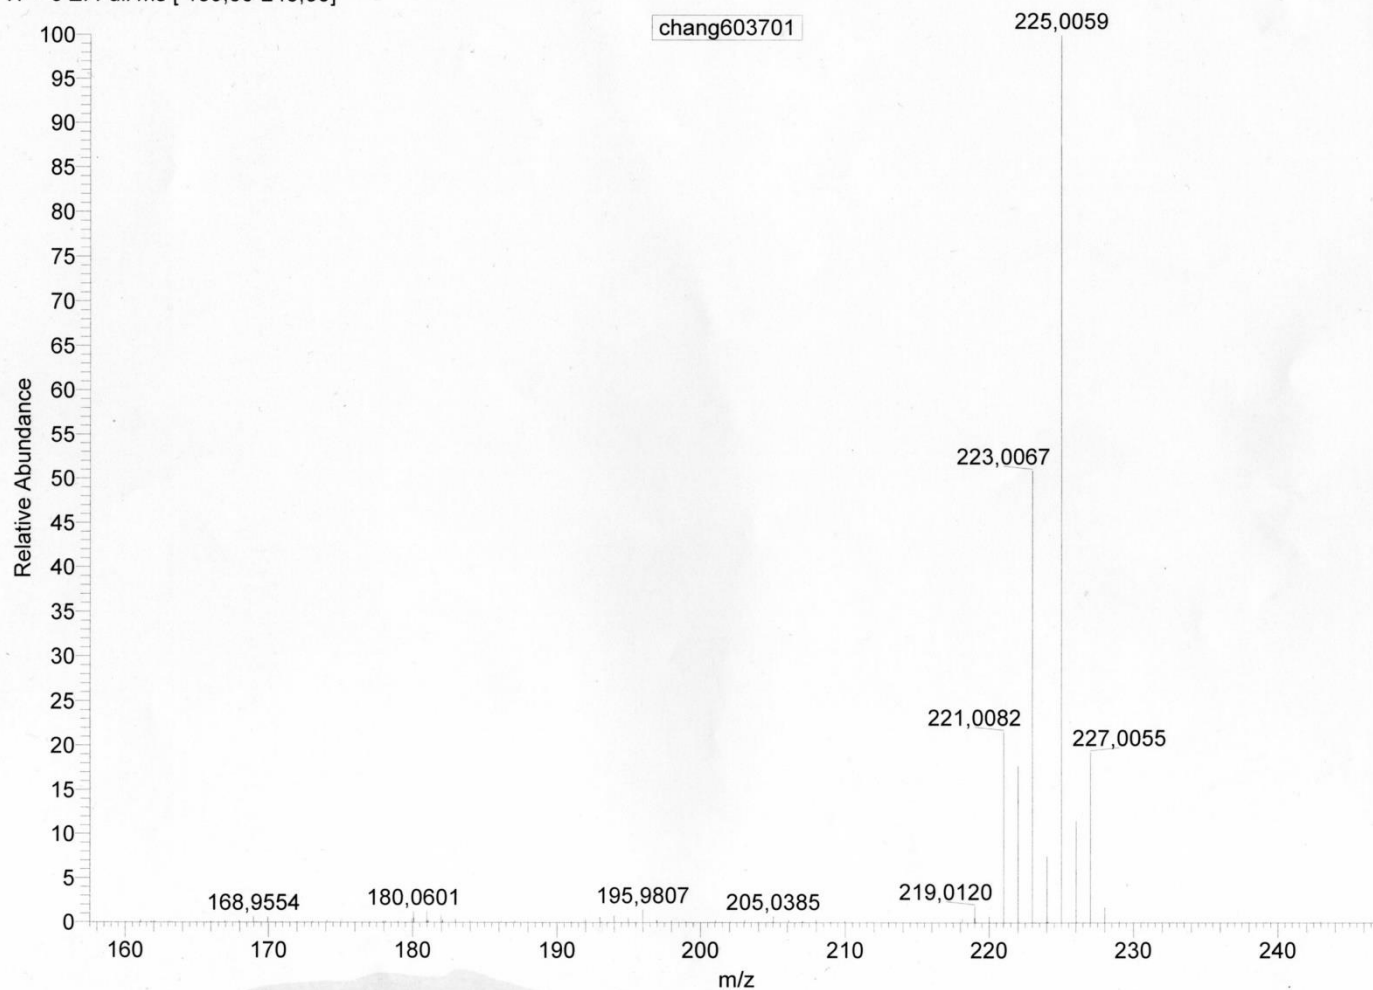

**1b HR-MS**



Isotope:           Min. ... Max.  
 12 C               0....15  
 1 H                0....30  
 14 N               0....3  
 80 Se              0....1  
 78 Se              0....1  
 Tolerance Window: +- 3.00 mmu  
 Db/Ring Equiv:    0.. 100           N-Rule: Do not use  
 Fits:             3                   Charge: 0

File : D:\Xcalibur\data\LIN-15-02\9\2e1hr-29-c1.RAW  
 Full ms [159.500 - 245.500 ] - Range: 159.500 - 245.500  
 Scan No. 1 of 10

| Mass     | Relative Intensity | Delta [mmu] | Composition                                                                  |
|----------|--------------------|-------------|------------------------------------------------------------------------------|
| 161.0847 | 0.3                |             |                                                                              |
| 168.9554 | 0.7                | -0.2        | C <sub>1</sub> H <sub>5</sub> Se <sub>1</sub>                                |
| 169.9629 | 0.6                | -0.6        | C <sub>1</sub> H <sub>6</sub> Se <sub>1</sub>                                |
| 179.9655 | 0.4                | 1.2         | C <sub>6</sub> H <sub>6</sub> <sup>78</sup> Se <sub>1</sub>                  |
| 180.0601 | 1.2                |             |                                                                              |
| 180.0844 | 0.5                |             |                                                                              |
| 180.9904 | 1.2                |             |                                                                              |
| 181.9641 | 0.8                | 0.6         | C <sub>6</sub> H <sub>6</sub> Se <sub>1</sub>                                |
| 182.0564 | 0.4                |             |                                                                              |
| 182.9702 | 0.4                | -1.1        | C <sub>6</sub> H <sub>7</sub> Se <sub>1</sub>                                |
| 191.9835 | 0.4                |             |                                                                              |
| 192.9842 | 0.6                |             |                                                                              |
| 193.9805 | 0.8                | 0.6         | C <sub>6</sub> H <sub>8</sub> <sup>78</sup> Se <sub>1</sub>                  |
| 194.9747 | 0.6                | -0.5        | C <sub>6</sub> H <sub>8</sub> N <sub>1</sub> <sup>78</sup> Se <sub>1</sub>   |
| 195.9807 | 1.4                | 1.6         | C <sub>6</sub> H <sub>9</sub> Se <sub>1</sub>                                |
|          |                    | -2.3        | C <sub>6</sub> H <sub>8</sub> N <sub>1</sub> <sup>78</sup> Se <sub>1</sub>   |
| 196.9728 | 0.3                | -1.6        | C <sub>6</sub> H <sub>9</sub> N <sub>1</sub> Se <sub>1</sub>                 |
| 203.0365 | 0.3                | -1.2        | C <sub>6</sub> H <sub>15</sub> N <sub>1</sub> <sup>78</sup> Se <sub>1</sub>  |
|          |                    | 2.6         | C <sub>6</sub> H <sub>15</sub> Se <sub>1</sub>                               |
| 205.0385 | 0.7                | 1.5         | C <sub>6</sub> H <sub>15</sub> N <sub>1</sub> Se <sub>1</sub>                |
|          |                    | -2.4        | C <sub>6</sub> H <sub>15</sub> N <sub>2</sub> <sup>78</sup> Se <sub>1</sub>  |
| 207.9833 | 0.3                | 0.3         | C <sub>6</sub> H <sub>8</sub> N <sub>1</sub> <sup>78</sup> Se <sub>1</sub>   |
| 218.1176 | 0.4                |             |                                                                              |
| 218.9833 | 0.5                |             |                                                                              |
| 219.0120 | 1.8                |             |                                                                              |
| 220.0011 | 0.7                |             |                                                                              |
| 221.0082 | 21.6               |             |                                                                              |
| 222.0094 | 17.8               | 0.2         | C <sub>15</sub> N <sub>1</sub>                                               |
|          |                    | -1.8        | C <sub>11</sub> H <sub>12</sub> <sup>78</sup> Se <sub>1</sub>                |
|          |                    | 0.3         | C <sub>10</sub> H <sub>11</sub> N <sub>1</sub> <sup>78</sup> Se <sub>1</sub> |
| 223.0067 | 50.9               |             |                                                                              |
| 224.0065 | 7.5                |             |                                                                              |
| 225.0059 | 100.0              | 0.2         | C <sub>10</sub> H <sub>11</sub> N <sub>1</sub> Se <sub>1</sub>               |
| 226.0085 | 11.5               |             |                                                                              |
| 227.0055 | 19.3               |             |                                                                              |
| 228.0098 | 1.7                |             |                                                                              |

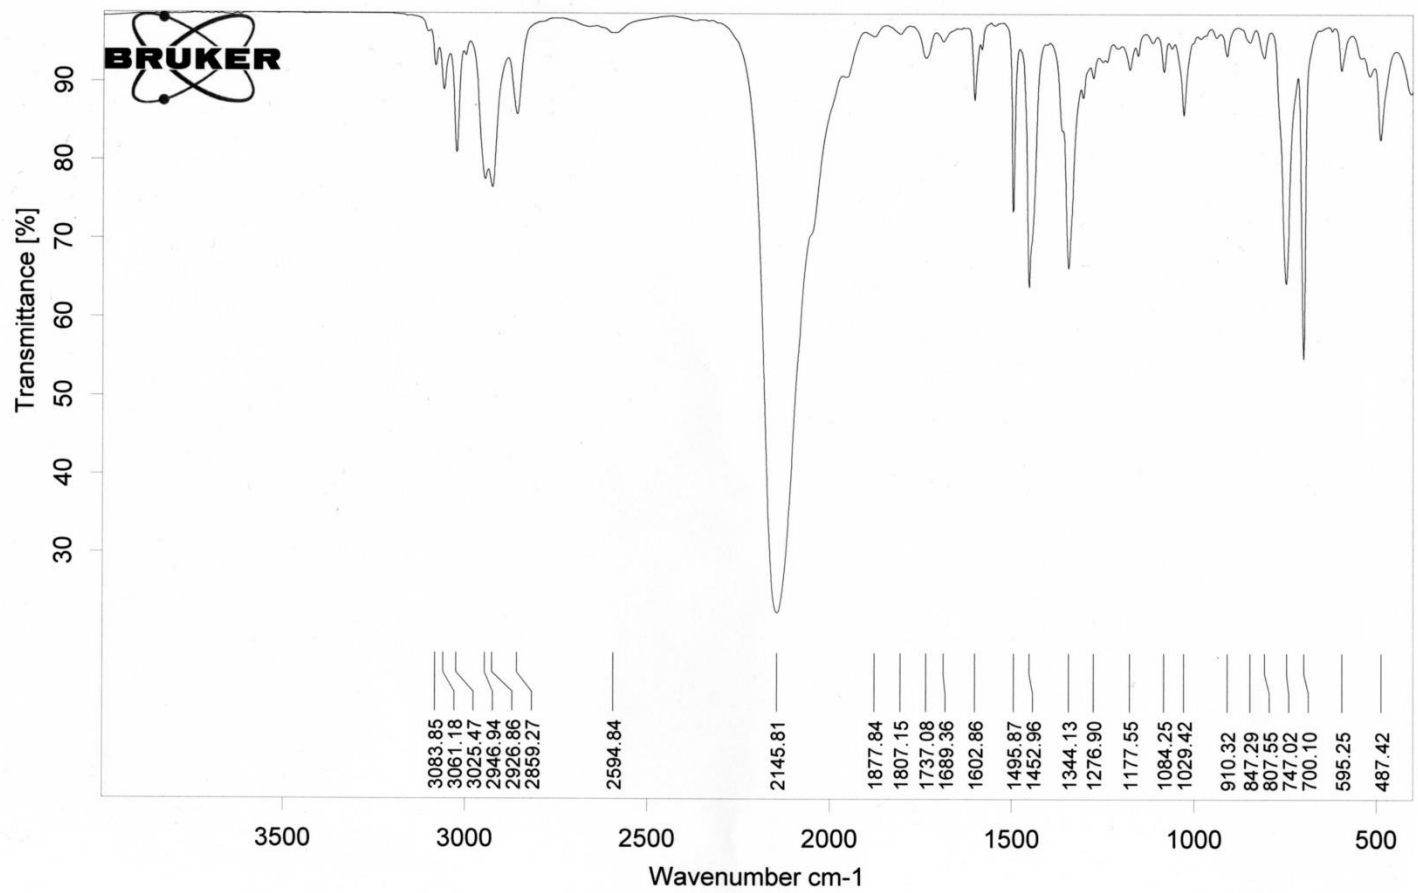

D:\temp-files\FTIR files\201502\20150210\MIR\_TR\_DTGS\_chang603701.0.dpt

1b FT-IR

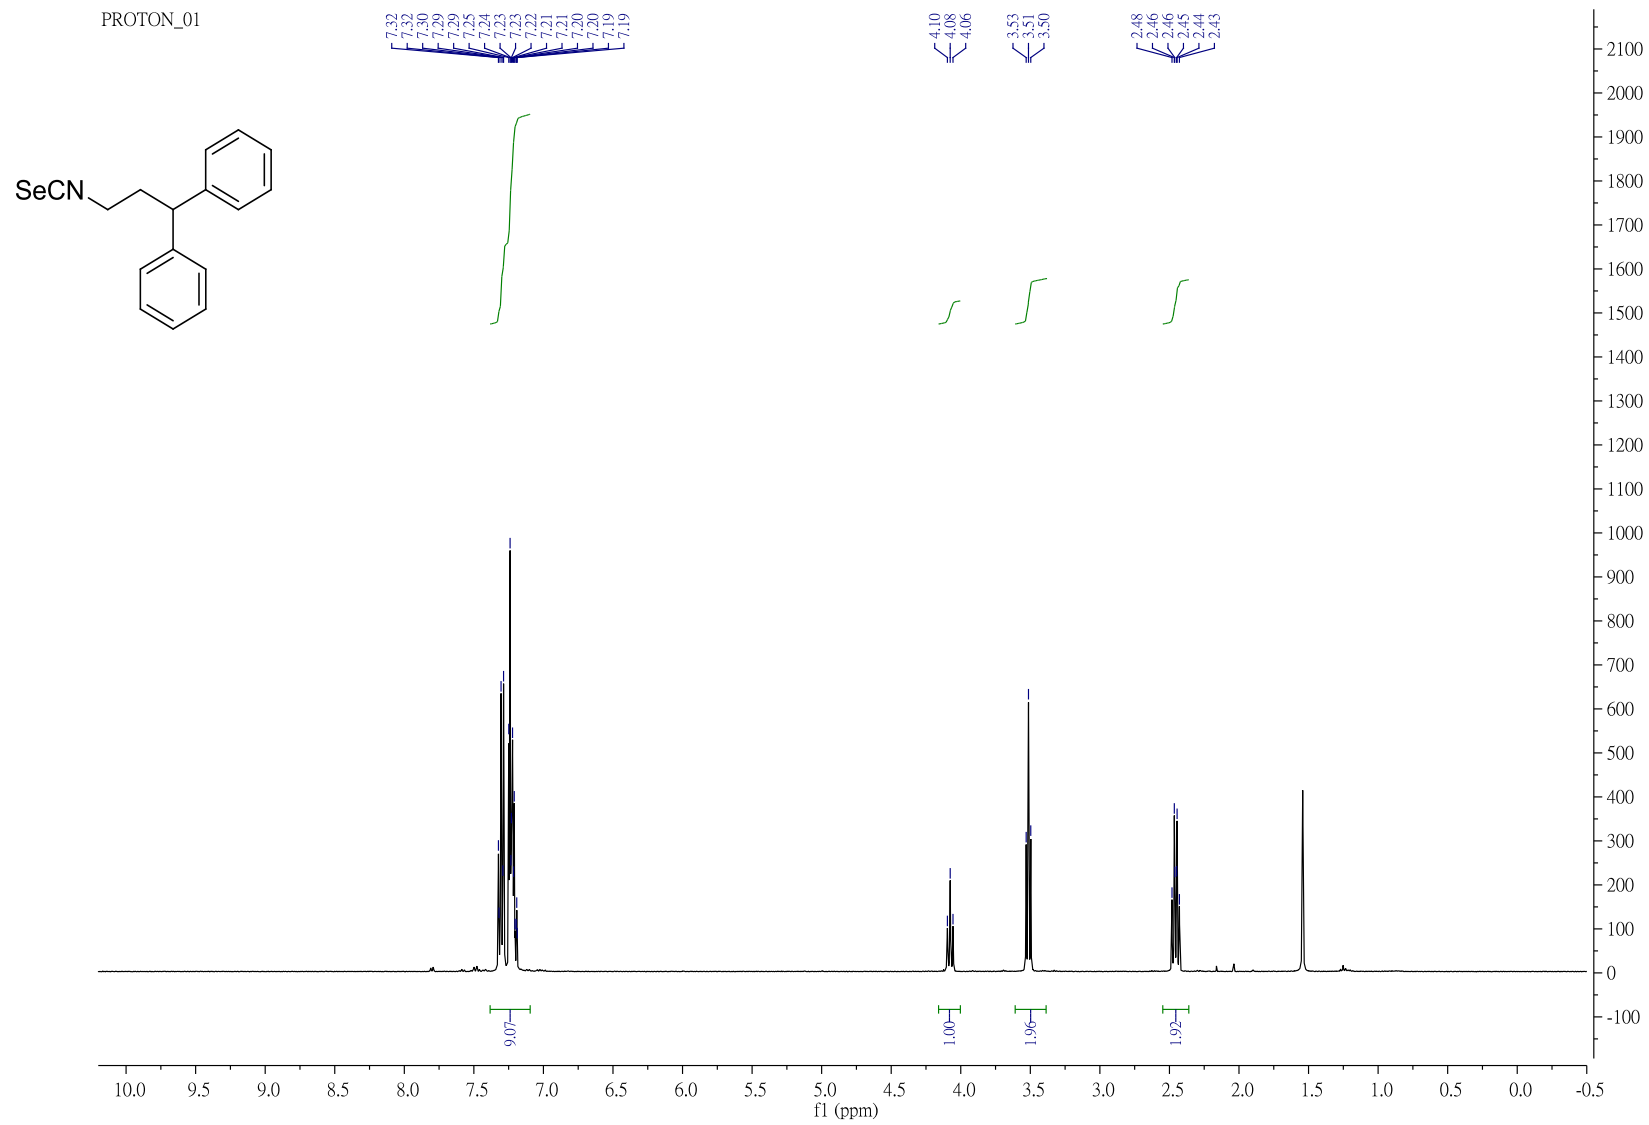

**1c**  $^1\text{H}$ -NMR

CARBON\_01

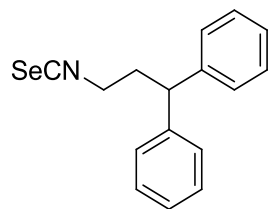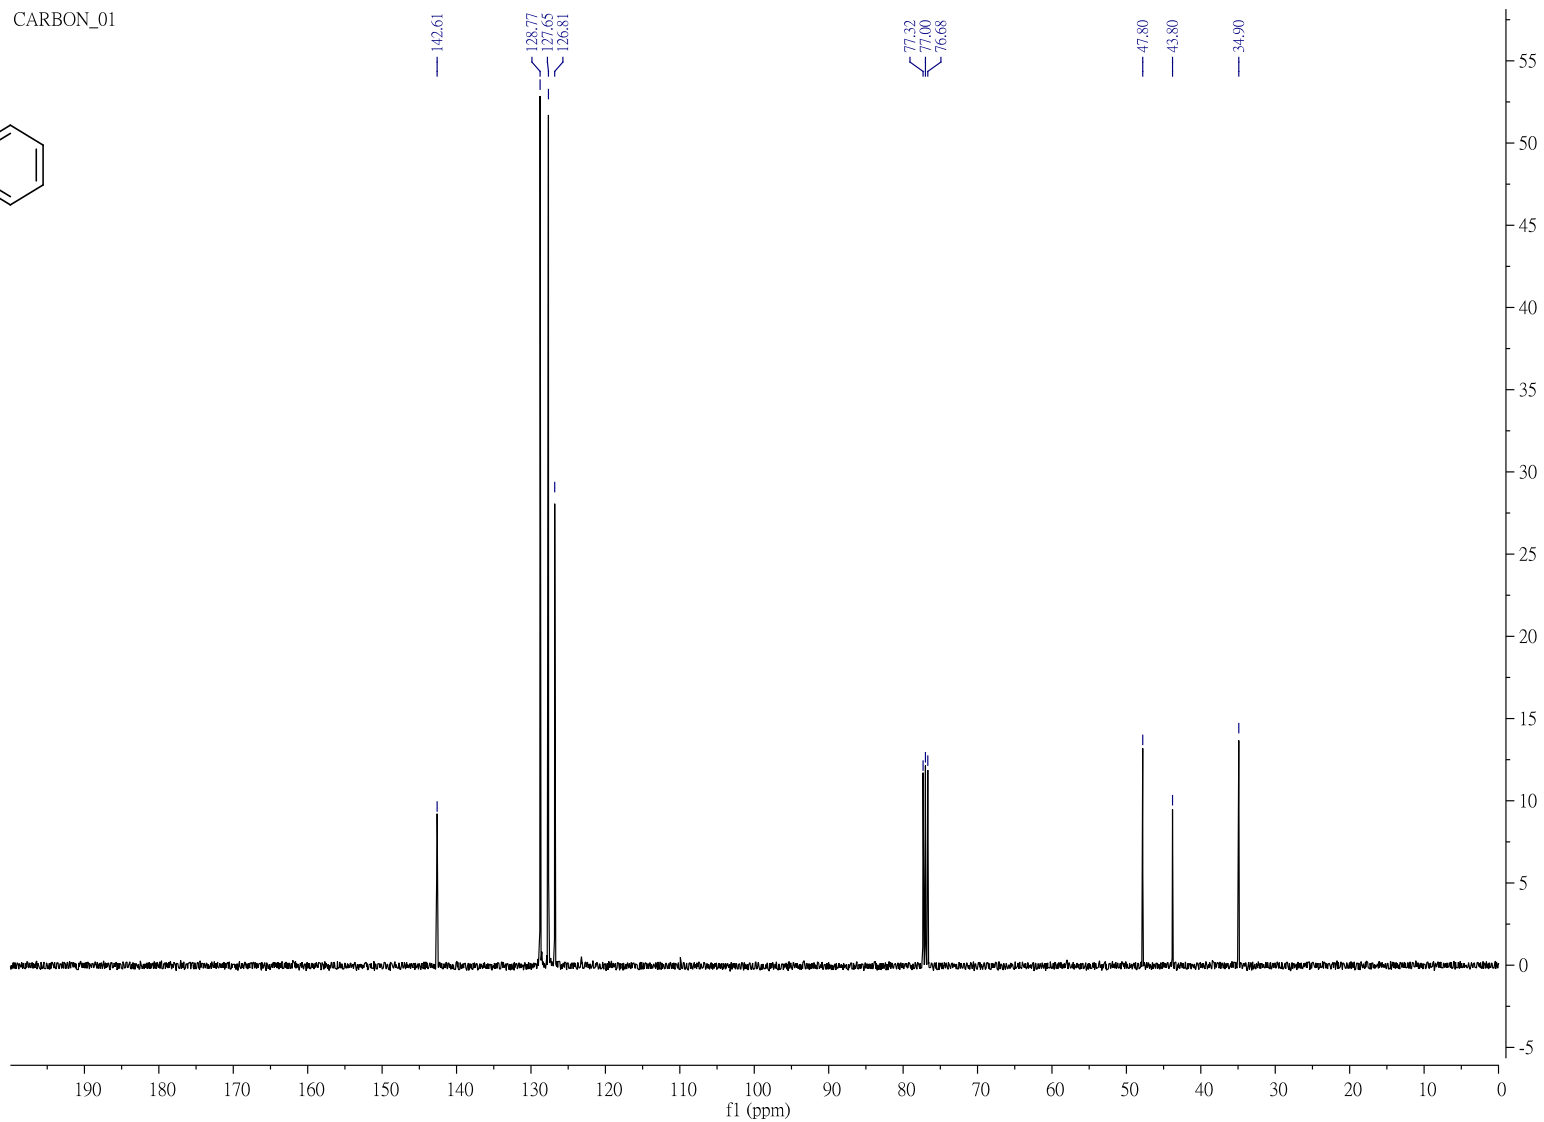

1c C<sup>13</sup>-NMR

2014022705\_chang702201 #211 RT: 0.75 AV: 1 NL: 1.06E8  
T: {0,0} + c EI Full ms [50.00-900.00]

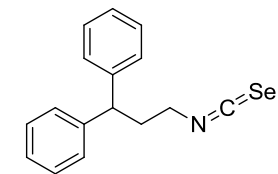

Exact Mass: 301.0370

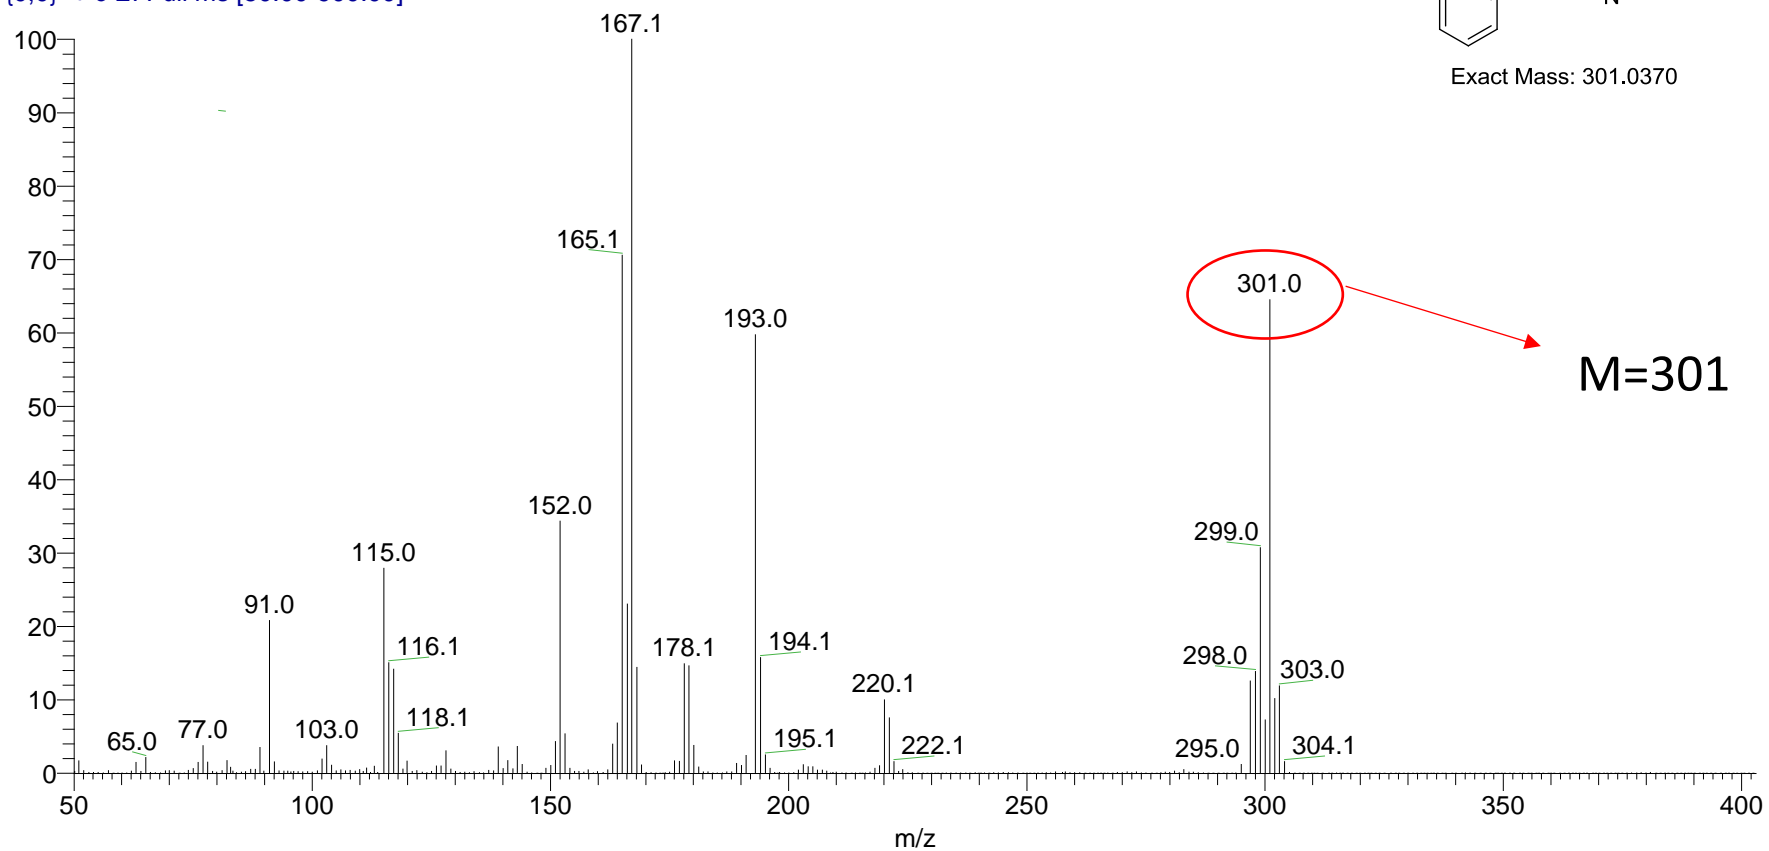

1c LR-MS

1eibr-79-c1 #3 RT: 0,20 AV: 1 NL: 1,10E7  
T: + c EI Full ms [ 209,50-320,50]

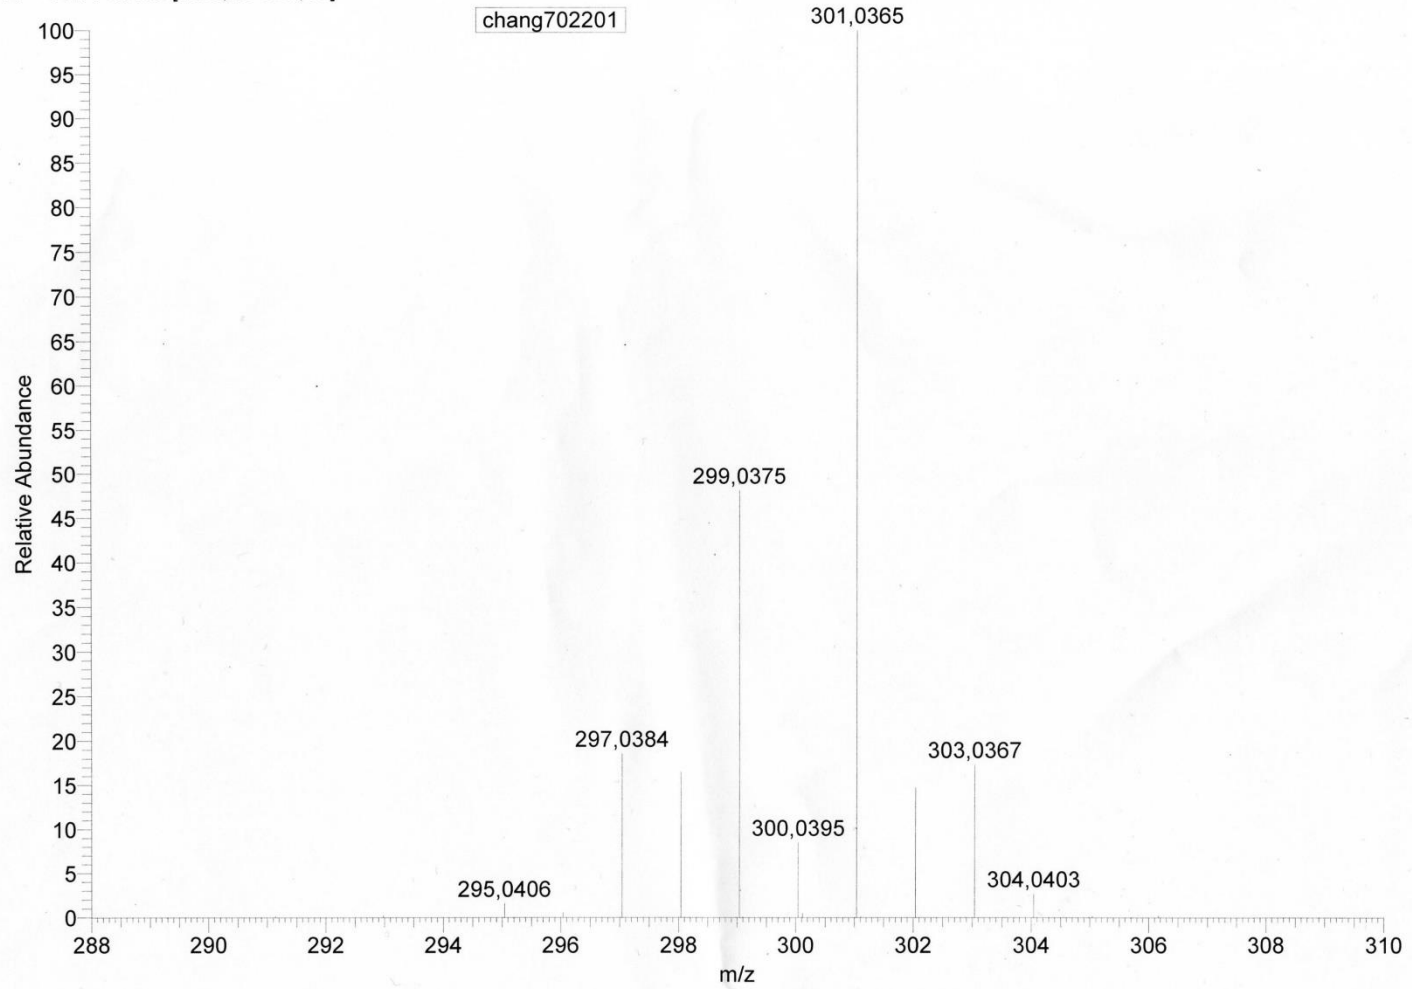

1c HR-MS

Isotope:           Min. . . Max.  
 12 C               0....20  
 1 H                0....25  
 14 N               0....1  
 80 Se              0....1  
 78 Se              0....1  
 Tolerance Window: +- 3.00 mmu  
 Db/Ring Equiv:    0.. 100           N-Rule: Do not use  
 Fits:              3                   Charge: 0

File : D:\Xcalibur\data\LIN-15-01\14\leibr-79-c1.RAW  
 Full ms [209.500 - 320.500] - Range: 209.500 - 320.500  
 Scan No. 3 of 10

| Mass     | Relative Intensity | Delta [mmu] | Composition                                                                  |
|----------|--------------------|-------------|------------------------------------------------------------------------------|
| 218.0942 | 0.7                | -2.8        | C <sub>16</sub> H <sub>12</sub> N <sub>1</sub>                               |
| 218.9842 | 2.6                |             |                                                                              |
| 219.1038 | 1.0                | -1.0        | C <sub>16</sub> H <sub>13</sub> N <sub>1</sub>                               |
| 220.1105 | 20.8               | -2.1        | C <sub>16</sub> H <sub>14</sub> N <sub>1</sub>                               |
| 221.1191 | 14.1               | -1.4        | C <sub>16</sub> H <sub>13</sub> N <sub>1</sub>                               |
| 222.1220 | 2.2                |             |                                                                              |
| 222.9758 | 1.1                |             |                                                                              |
| 224.9730 | 1.1                |             |                                                                              |
| 242.9855 | 1.0                | -2.3        | C <sub>13</sub> H <sub>9</sub> <sup>78</sup> Se <sub>1</sub>                 |
| 249.0925 | 0.9                |             |                                                                              |
| 250.0983 | 0.6                |             |                                                                              |
| 257.0954 | 0.7                | -1.8        | C <sub>13</sub> H <sub>23</sub> <sup>78</sup> Se <sub>1</sub>                |
| 295.0406 | 1.6                |             |                                                                              |
| 296.0394 | 0.6                |             |                                                                              |
| 297.0384 | 18.6               |             |                                                                              |
| 298.0398 | 16.5               | -2.7        | C <sub>17</sub> H <sub>16</sub> <sup>78</sup> Se <sub>1</sub>                |
| 299.0375 | 48.1               | -0.3        | C <sub>16</sub> H <sub>15</sub> N <sub>1</sub> <sup>78</sup> Se <sub>1</sub> |
| 300.0395 | 8.5                | -2.2        | C <sub>17</sub> H <sub>16</sub> Se <sub>1</sub>                              |
| 301.0365 | 100.0              | -0.5        | C <sub>16</sub> H <sub>15</sub> N <sub>1</sub> Se <sub>1</sub>               |
| 302.0401 | 14.7               |             |                                                                              |
| 303.0367 | 17.4               |             |                                                                              |
| 304.0403 | 2.7                |             |                                                                              |

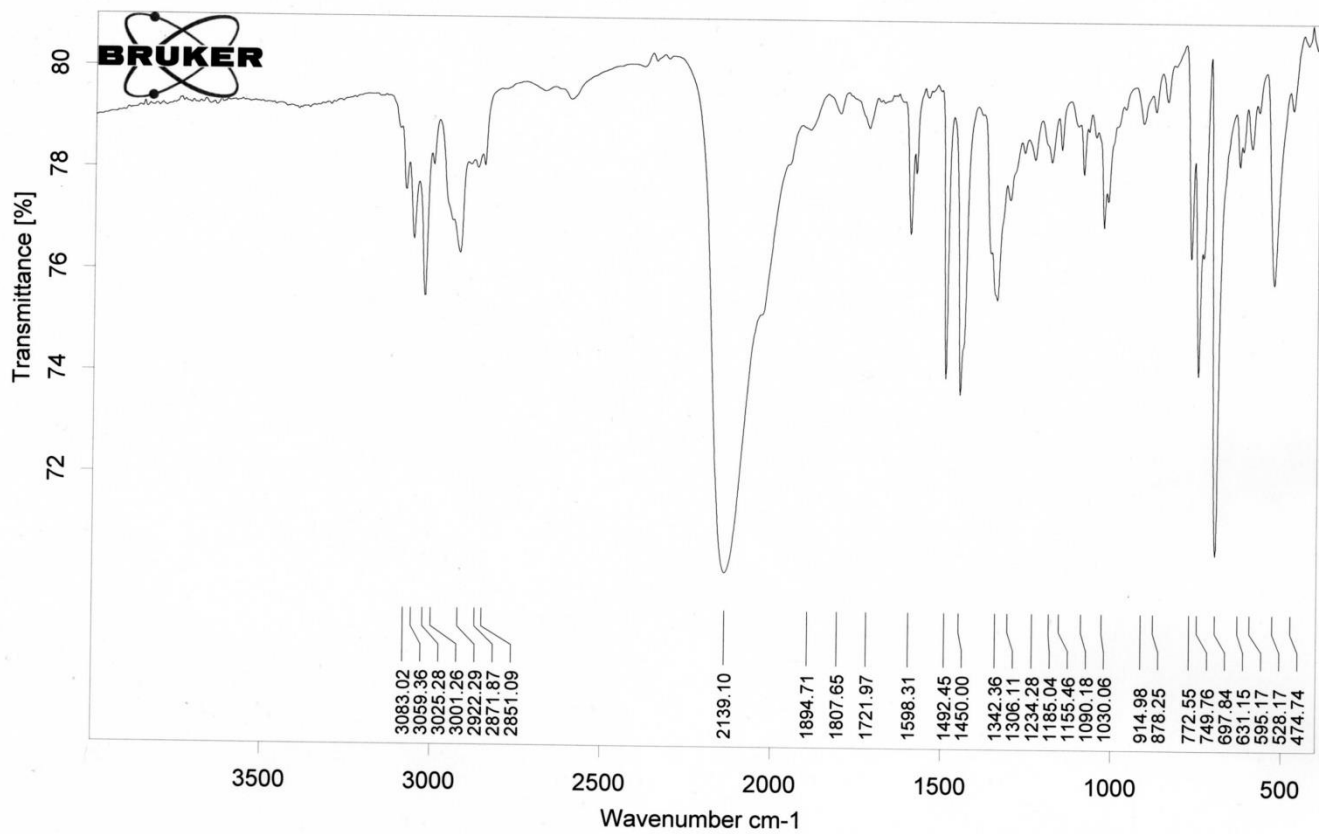

D:\temp-files\FTIR files\201501\20150121\MIR\_TR\_DTGS\_blank KBr\_chang702201.0.dpt

1c FT-IR



602303\_20130424\_01

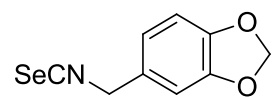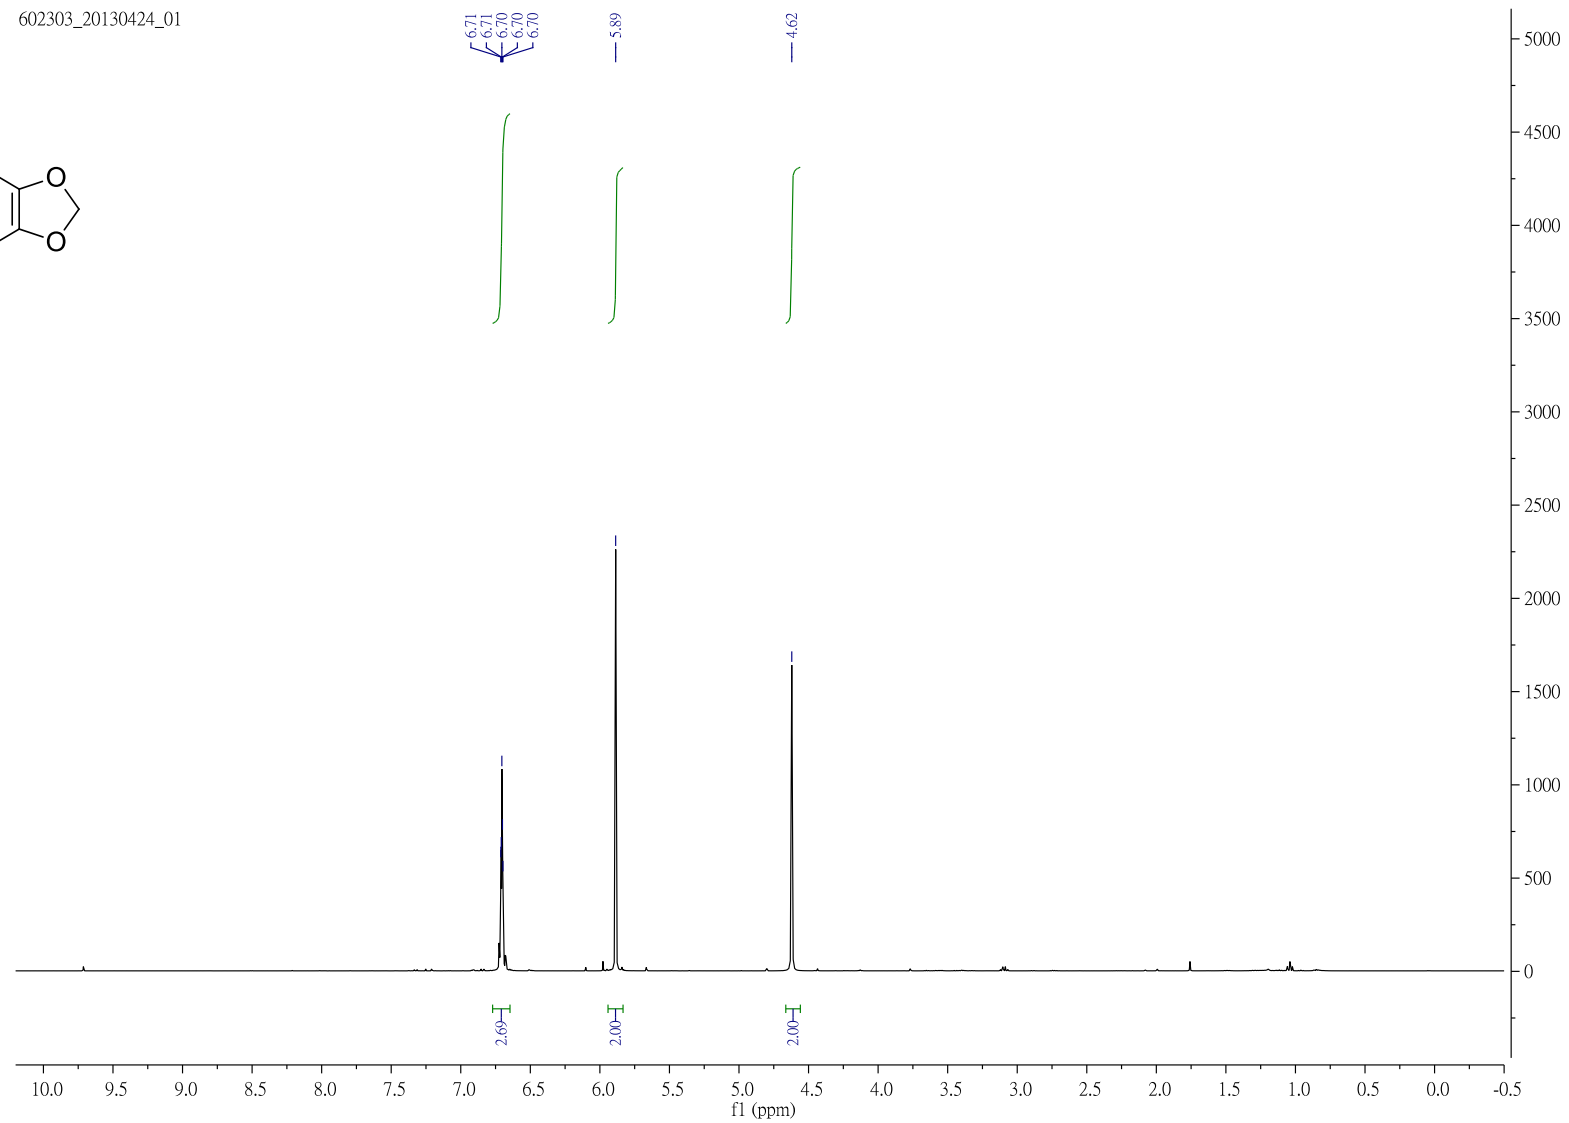

1d H<sup>1</sup>-NMR

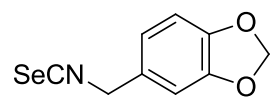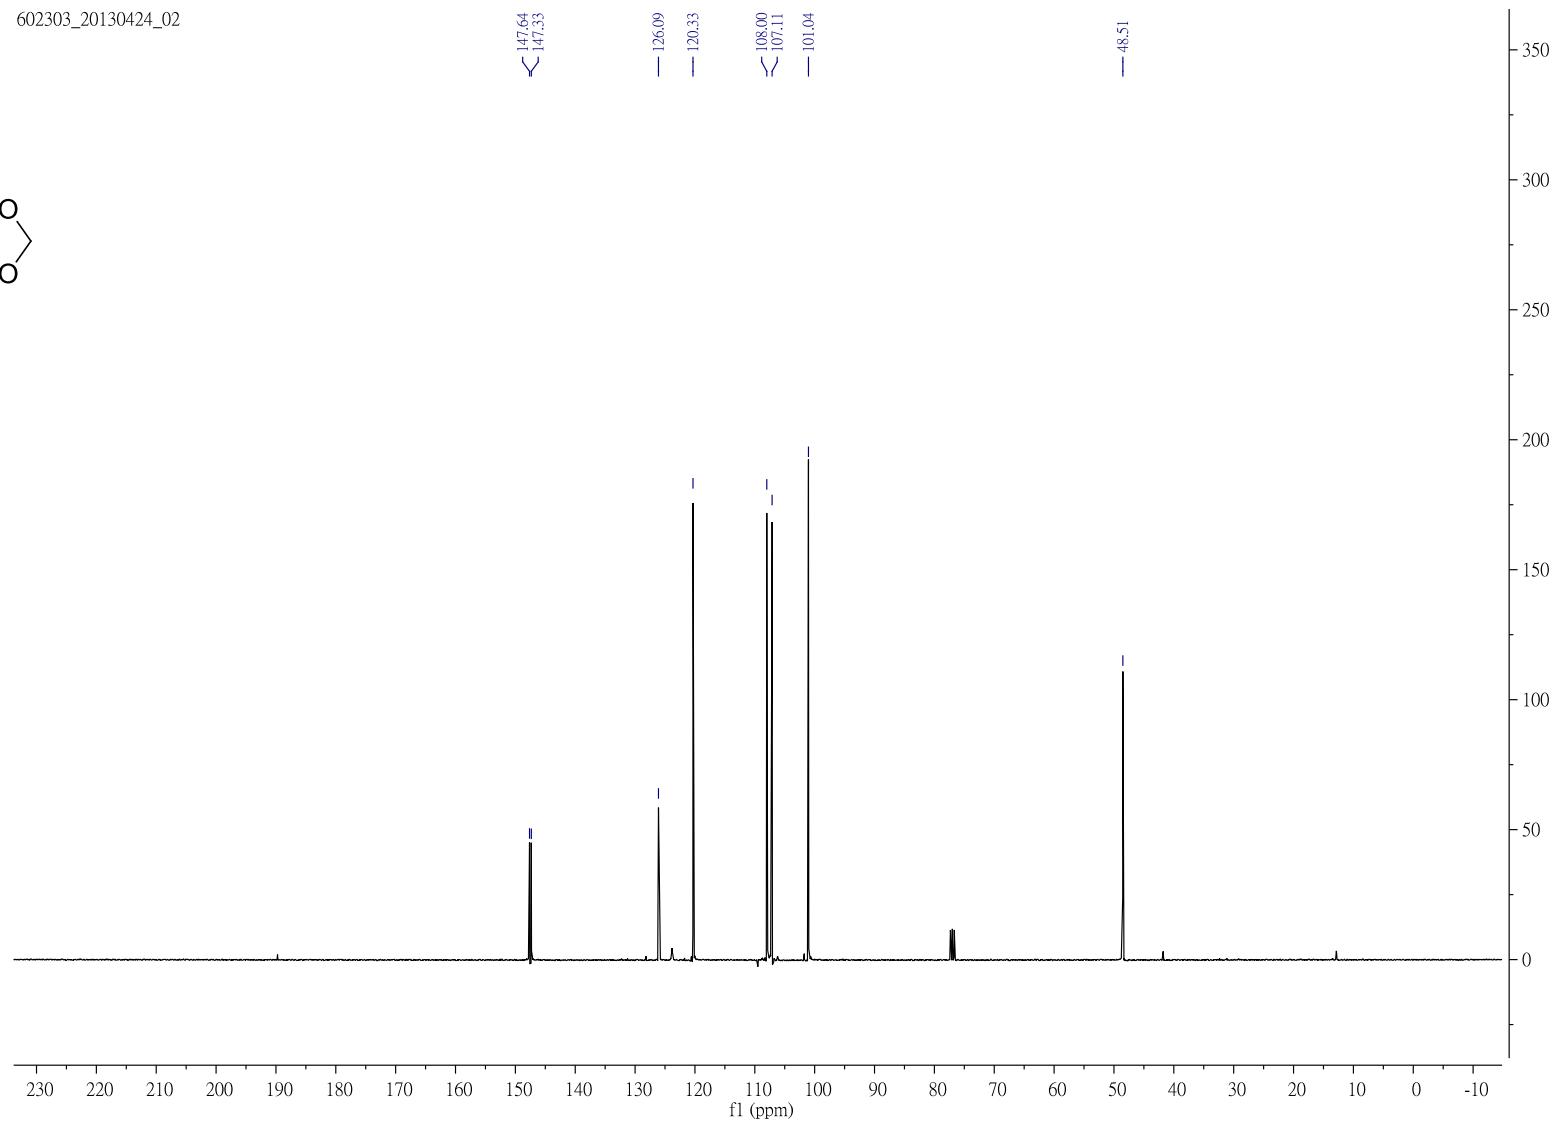**1d C<sup>13</sup>-NMR**

1e1lr-35  
Type: Unknown ID: Row: 1  
Sample Name: chang503301  
Comments: FINNIGAN MAT-95XL  
Study:  
Client:  
Operator: sclin  
:  
:

1e1lr-35 #1 RT: 0,08 AV: 1 NL: 1,48E7  
T: + c EI Full ms [ 49,50-500,50]

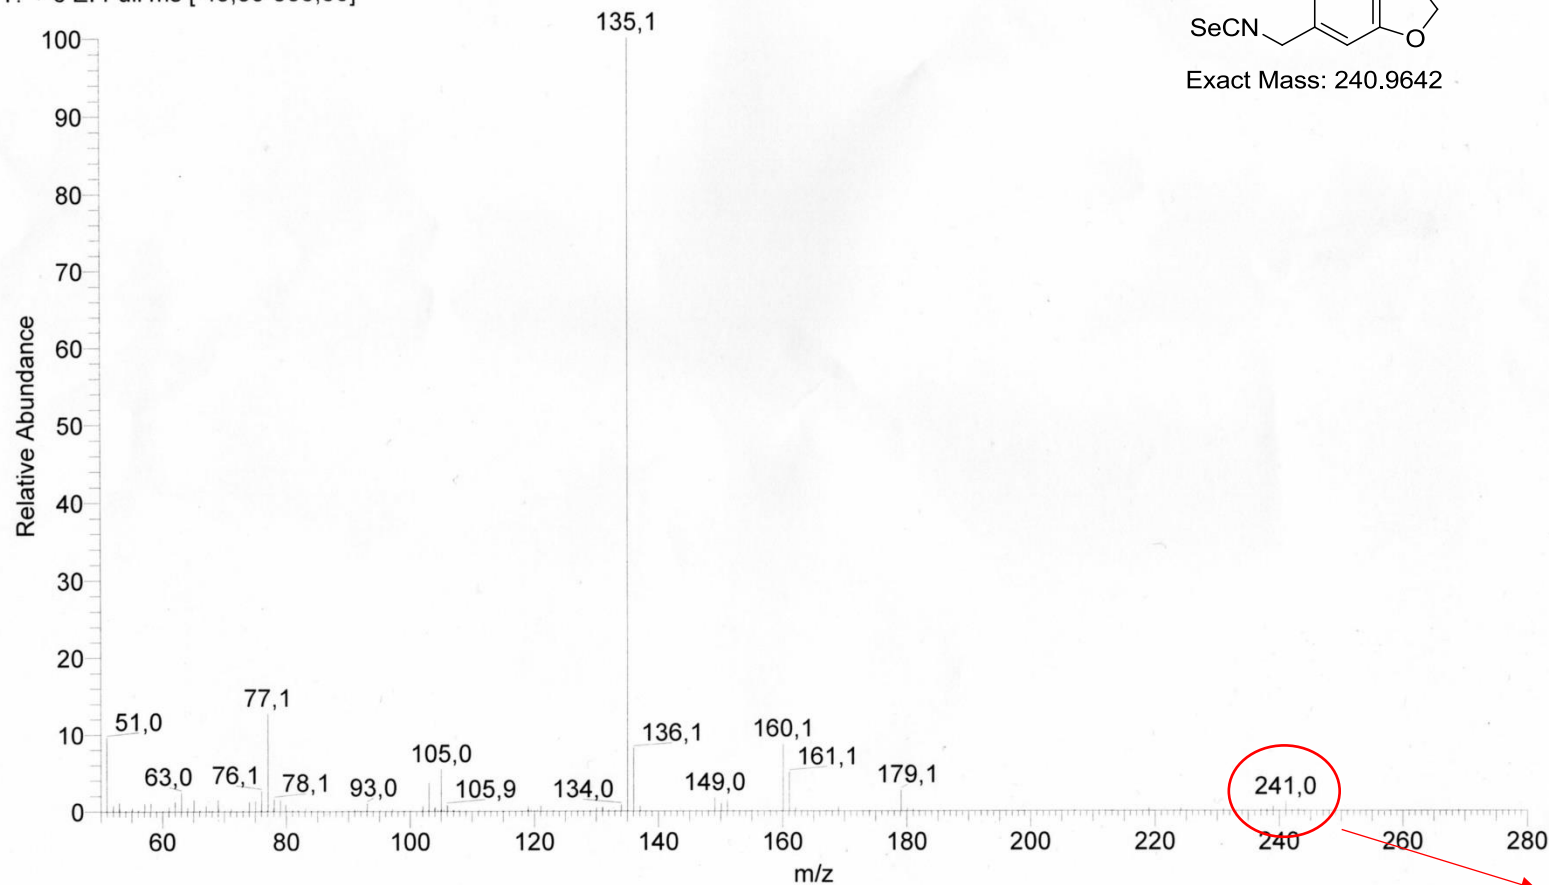

1d LR-MS

S35

M=241

1e1hr-113-c1 #1 RT: 0,14 AV: 1 NL: 4,83E6  
T: + c EI Full ms [ 166,50-258,50]

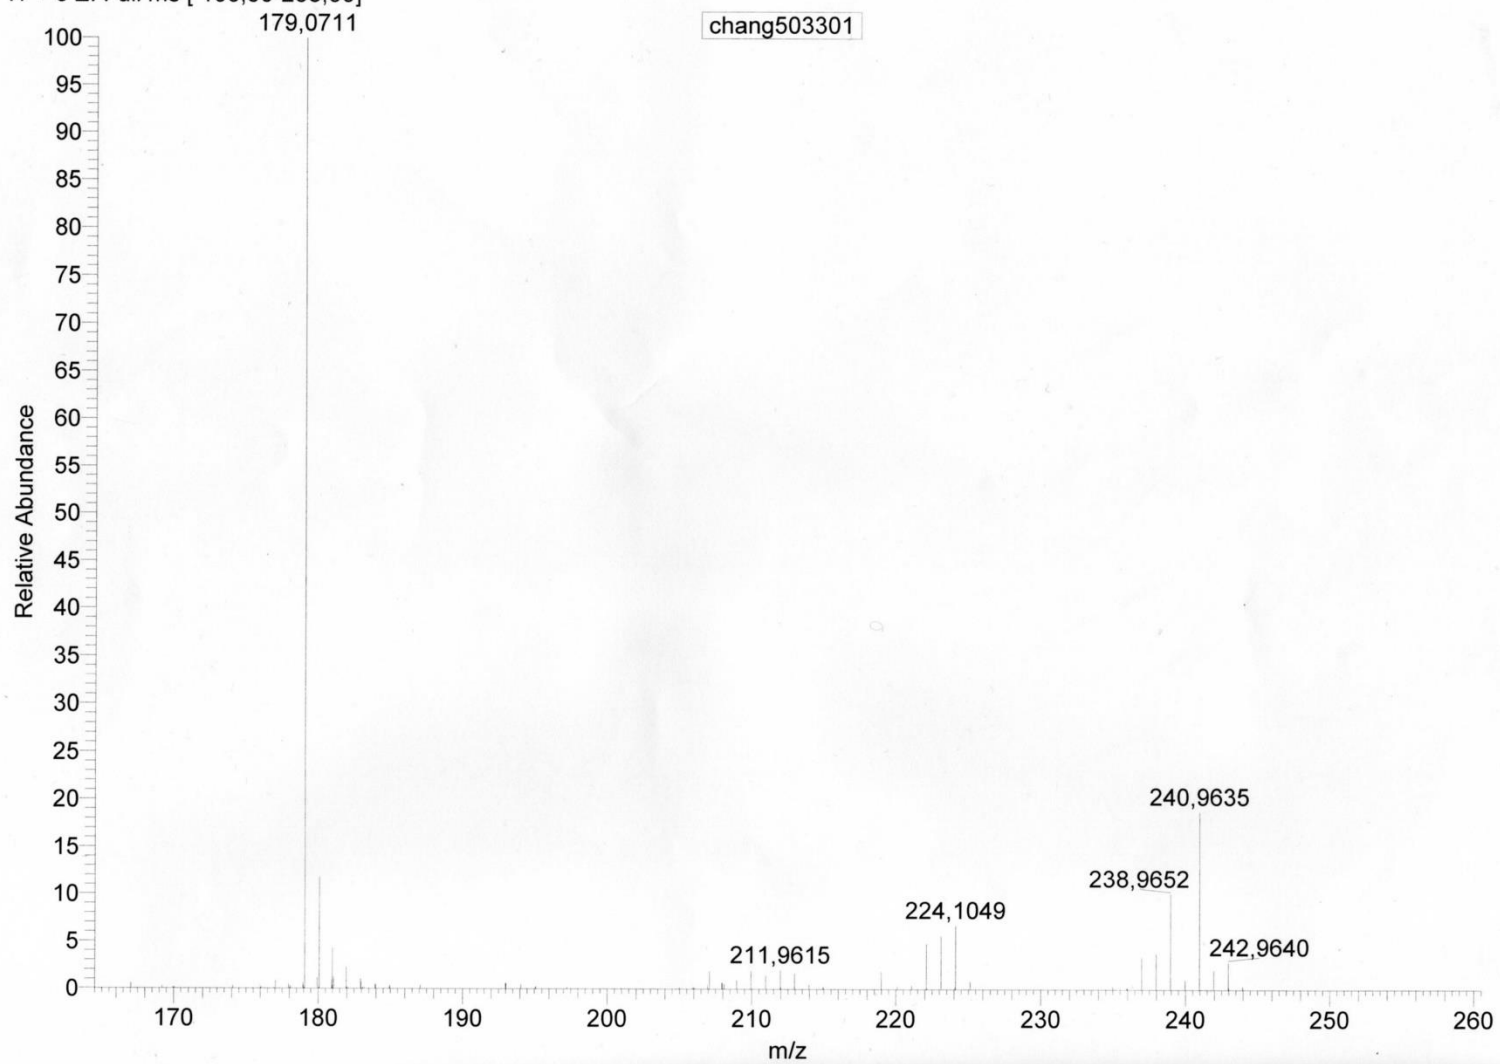

1d HR-MS

Isotope:           Min. ... Max.  
 12 C               0....10  
 1 H                0....18  
 14 N               0....1  
 16 O               0....3  
 80 Se              0....1  
 78 Se              0....1  
 Tolerance Window: +- 3.00 mmu  
 Db/Ring Equiv:    0.. 100           N-Rule: Do not use  
 Fits:              3                   Charge: 0

File : D:\Xcalibur\data\LIN-15-01\21\lehr-113-c1.RAW  
 Full ms [166.500 - 258.500 ] - Range: 166.500 - 258.500  
 Scan No. 1 of 9

| Mass     | Relative Intensity | Delta [mmu] | Composition                                                                               |
|----------|--------------------|-------------|-------------------------------------------------------------------------------------------|
| 179.0711 | 100.0              | 0.3         | C <sub>10</sub> H <sub>11</sub> O <sub>3</sub>                                            |
| 179.9498 | 1.2                | 0.8         | C <sub>8</sub> H <sub>6</sub> O <sub>3</sub> <sup>78</sup> Se <sub>1</sub>                |
|          |                    | -1.8        | C <sub>7</sub> H <sub>4</sub> N <sub>1</sub> <sup>78</sup> Se <sub>1</sub>                |
|          |                    | 2.0         | C <sub>8</sub> H <sub>4</sub> Se <sub>1</sub>                                             |
| 180.0743 | 11.8               |             |                                                                                           |
| 180.9894 | 4.2                |             |                                                                                           |
| 181.0772 | 1.2                |             |                                                                                           |
| 181.9509 | 2.3                | -0.0        | C <sub>7</sub> H <sub>4</sub> N <sub>1</sub> Se <sub>1</sub>                              |
|          |                    | -1.2        | C <sub>8</sub> H <sub>4</sub> O <sub>1</sub> N <sub>1</sub> <sup>78</sup> Se <sub>1</sub> |
|          |                    | 2.7         | C <sub>8</sub> H <sub>6</sub> O <sub>3</sub> Se <sub>1</sub>                              |
|          |                    | 0.6         | C <sub>7</sub> H <sub>4</sub> O <sub>1</sub> Se <sub>1</sub>                              |
| 182.9355 | 1.1                |             |                                                                                           |
| 207.0803 | 1.9                |             |                                                                                           |
| 209.9451 | 1.9                | -0.7        | C <sub>7</sub> H <sub>4</sub> O <sub>1</sub> N <sub>1</sub> Se <sub>1</sub>               |
| 210.9511 | 1.4                | -2.6        | C <sub>7</sub> H <sub>4</sub> O <sub>1</sub> N <sub>1</sub> Se <sub>1</sub>               |
| 211.9615 | 2.0                | 0.0         | C <sub>7</sub> H <sub>4</sub> O <sub>1</sub> N <sub>1</sub> Se <sub>1</sub>               |
| 212.9463 | 1.7                | 0.9         | C <sub>7</sub> H <sub>4</sub> O <sub>1</sub> Se <sub>1</sub>                              |
|          |                    | -3.0        | C <sub>7</sub> H <sub>5</sub> O <sub>2</sub> N <sub>1</sub> <sup>78</sup> Se <sub>1</sub> |
| 218.9848 | 1.9                |             |                                                                                           |
| 222.1025 | 4.8                |             |                                                                                           |
| 223.1101 | 5.7                |             |                                                                                           |
| 224.1049 | 6.7                |             |                                                                                           |
| 236.9658 | 3.4                |             |                                                                                           |
| 237.9654 | 3.8                |             |                                                                                           |
| 238.9652 | 10.1               | 0.2         | C <sub>8</sub> H <sub>7</sub> O <sub>2</sub> N <sub>1</sub> <sup>78</sup> Se <sub>1</sub> |
| 239.9653 | 1.0                |             |                                                                                           |
| 240.9635 | 18.8               | -0.7        | C <sub>8</sub> H <sub>7</sub> O <sub>2</sub> N <sub>1</sub> Se <sub>1</sub>               |
| 241.9657 | 2.1                | 1.0         | C <sub>8</sub> H <sub>6</sub> O <sub>3</sub> <sup>78</sup> Se <sub>1</sub>                |
| 242.9640 | 2.9                |             |                                                                                           |

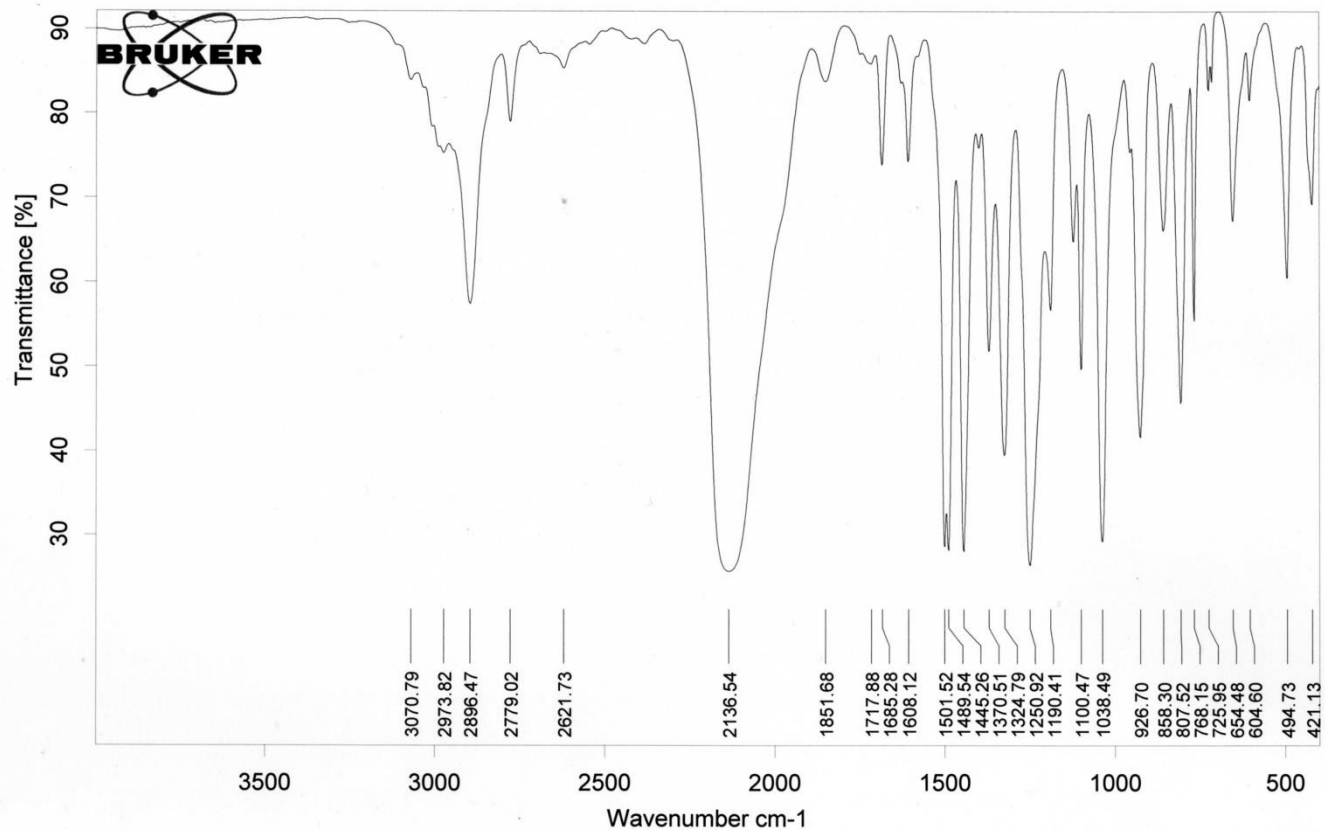

D:\temp-files\FTIR files\201501\20150121\MIR\_TR\_DTGS\_blank KBr\_chang503301.0.dpt

PROTON\_01

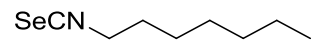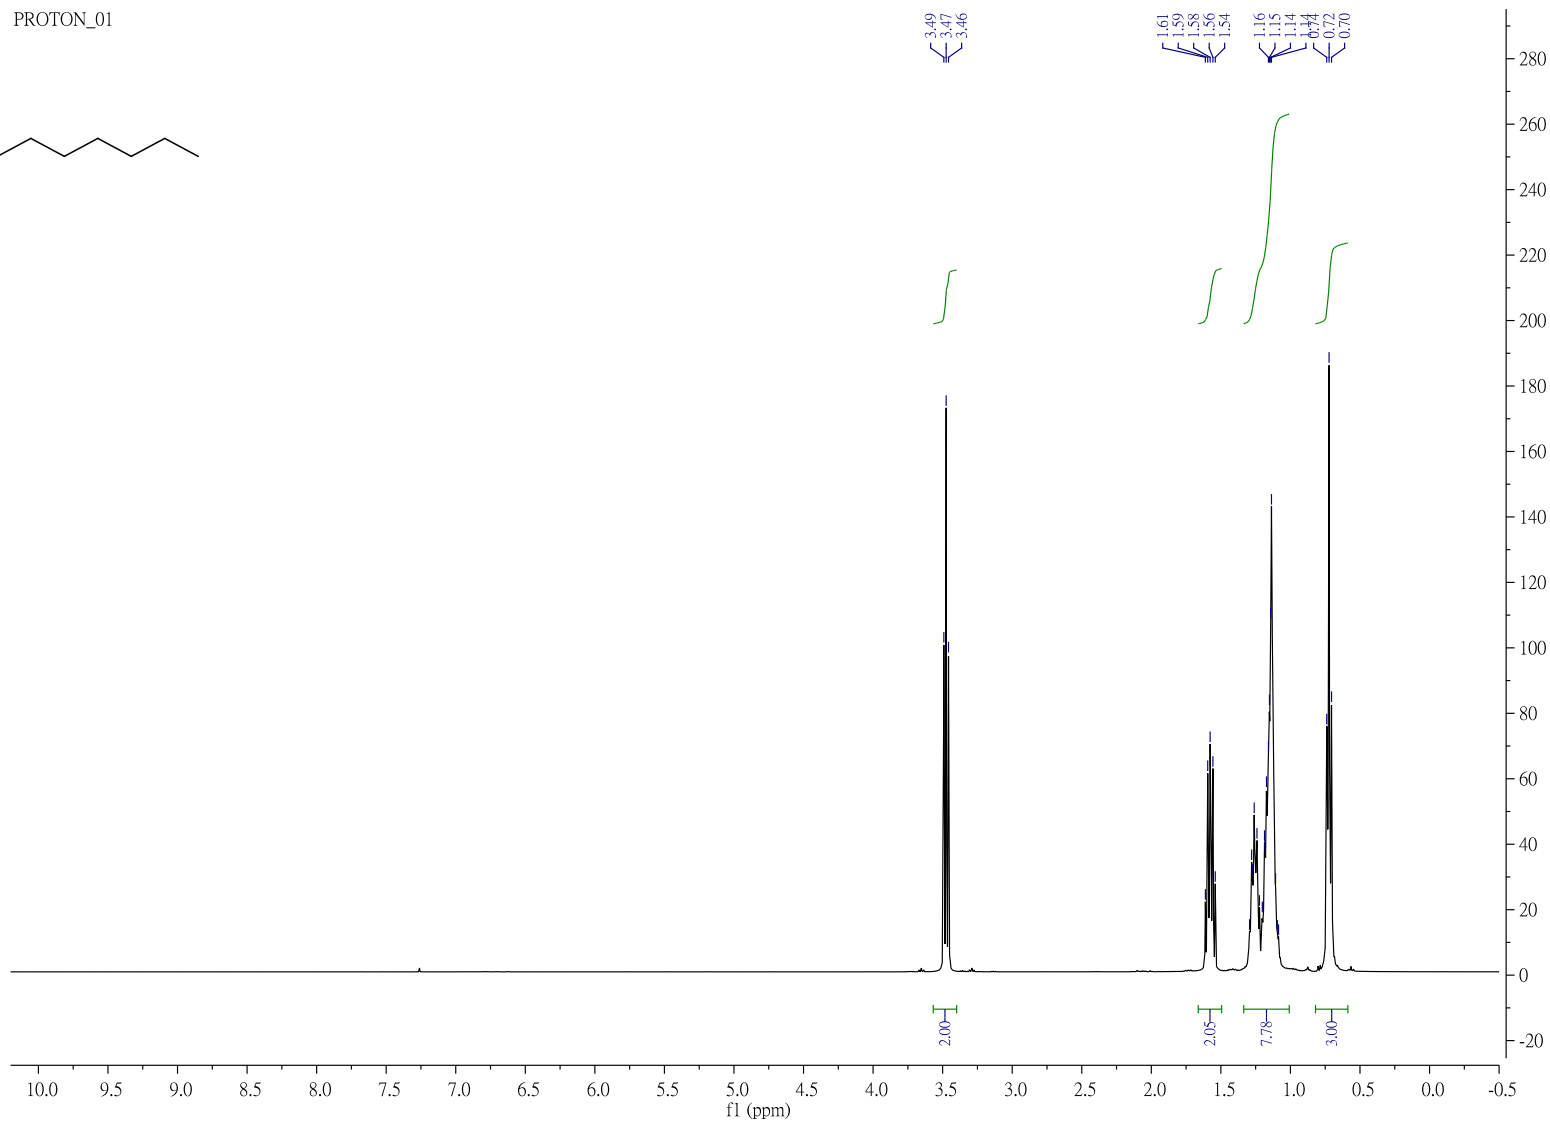

1e H<sup>1</sup>-NMR

CARBON\_01

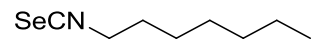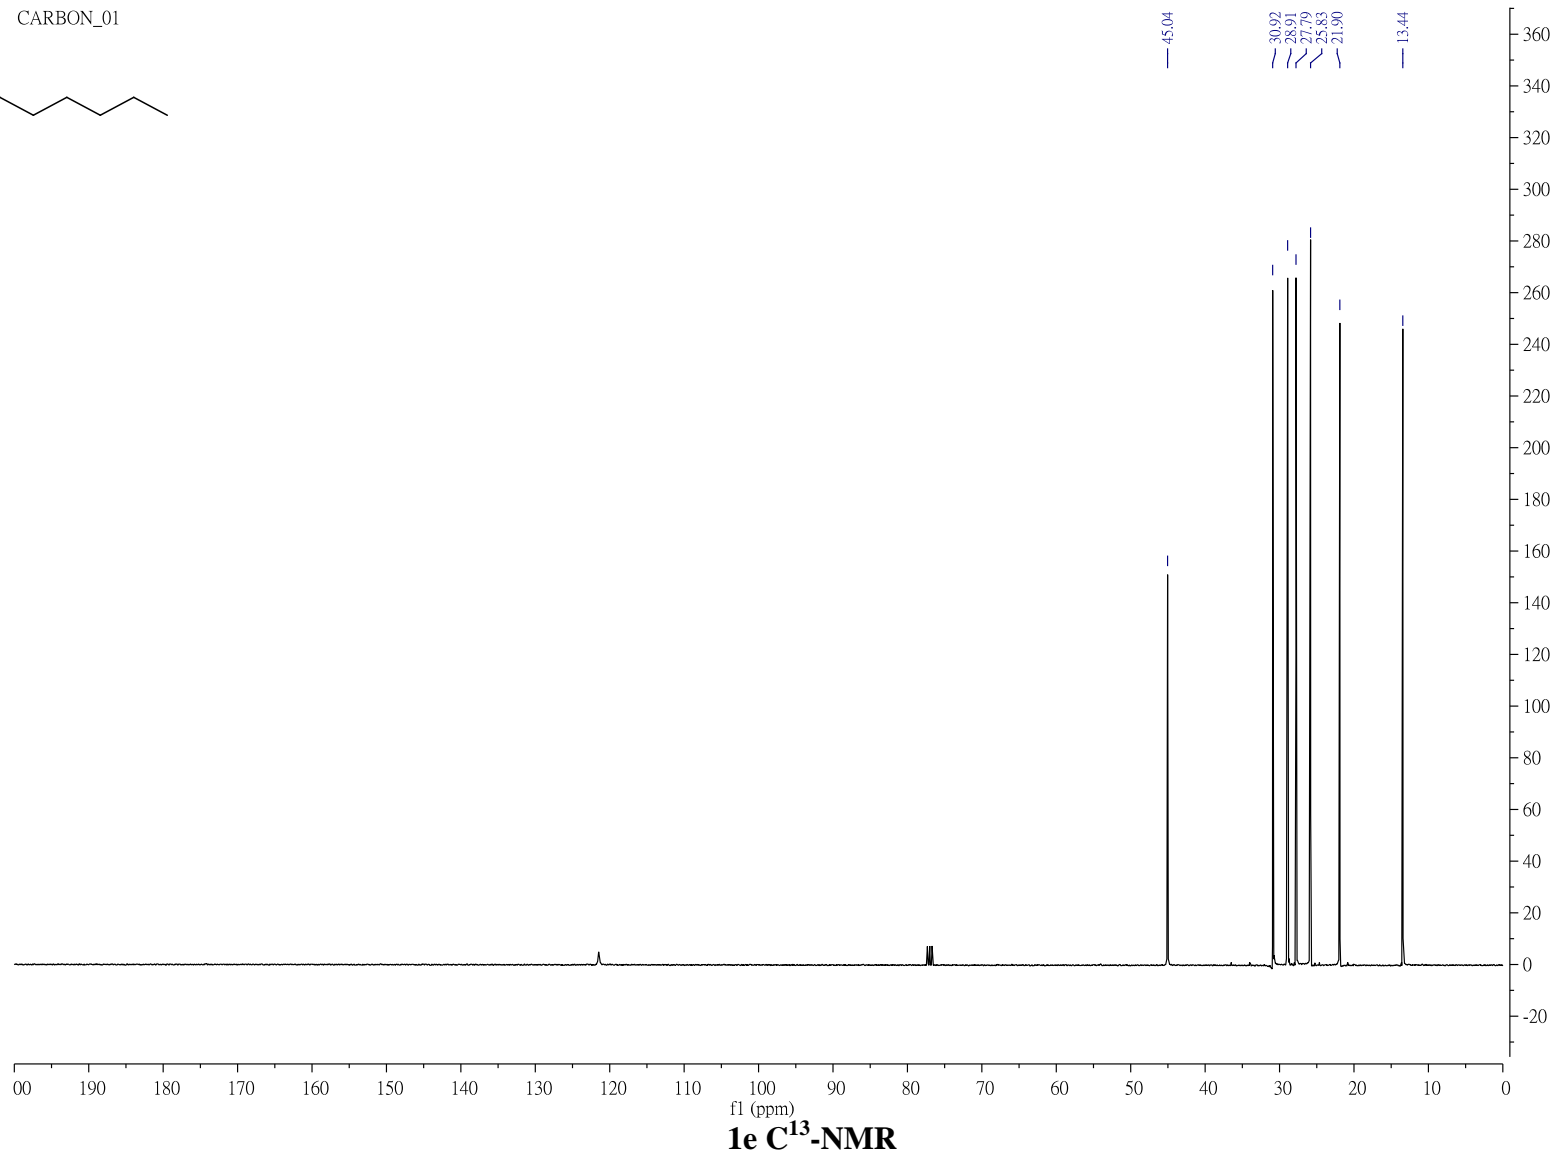



2014061003\_chang705101 #158 RT: 0.57 AV: 1 NL: 1.51E7  
T: {0,0} + c EI Full ms [50.00-900.00]

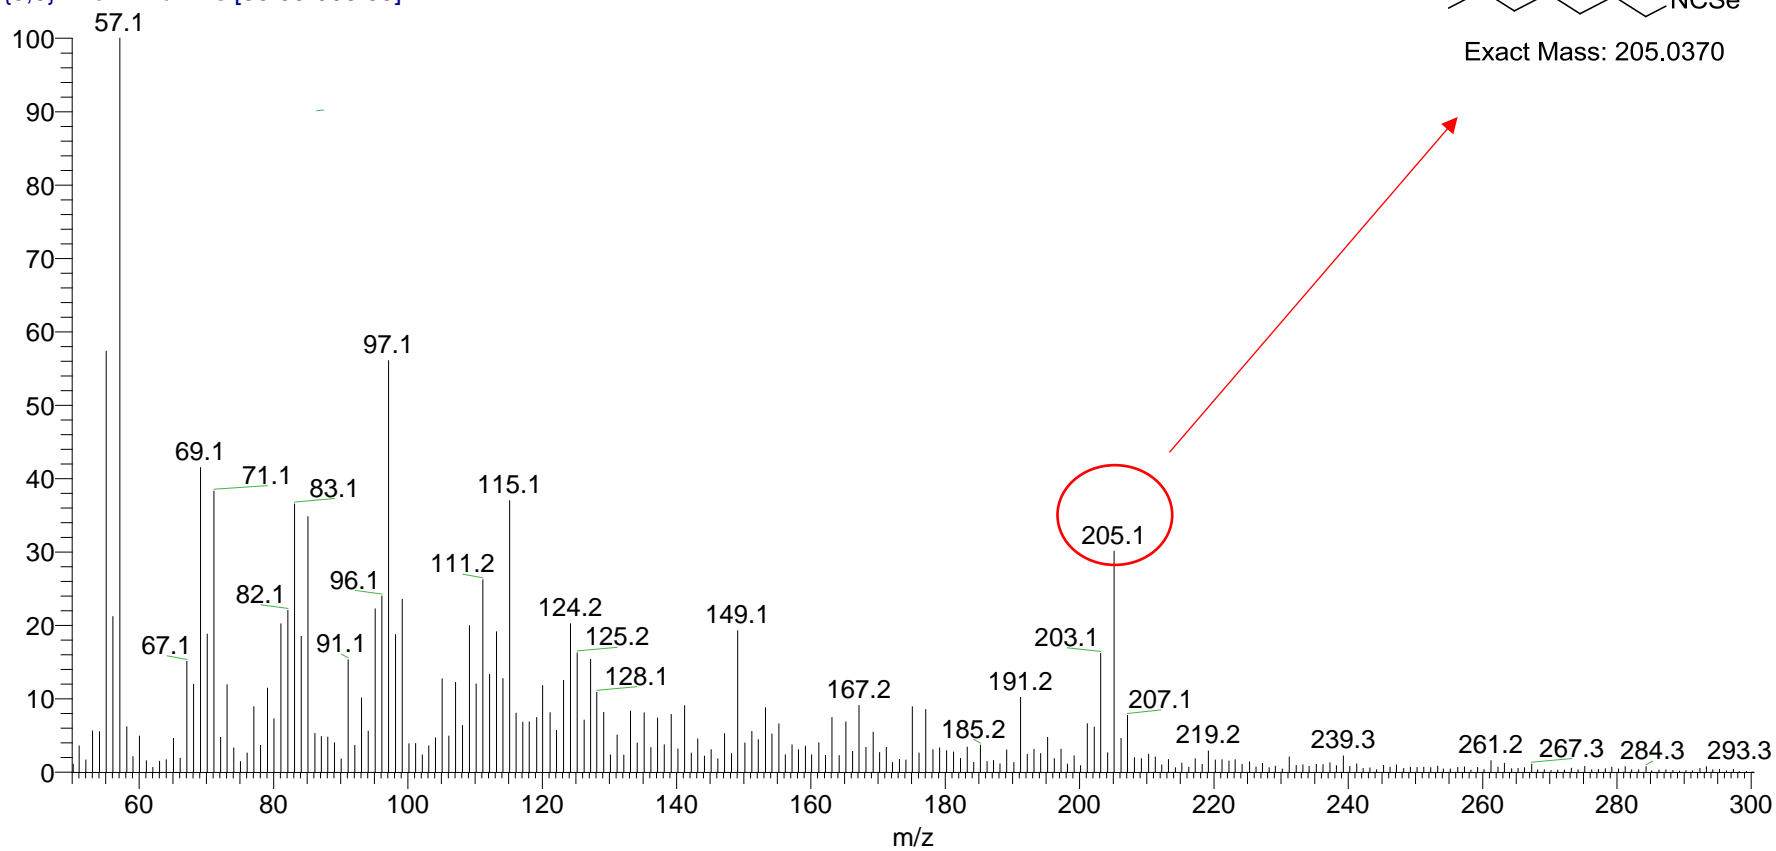

1e LR-MS

1e1hr-131-c1 #7 RT: 0,26 AV: 1 NL: 1,14E7  
T: + c EI Full ms [ 144,50-222,50]

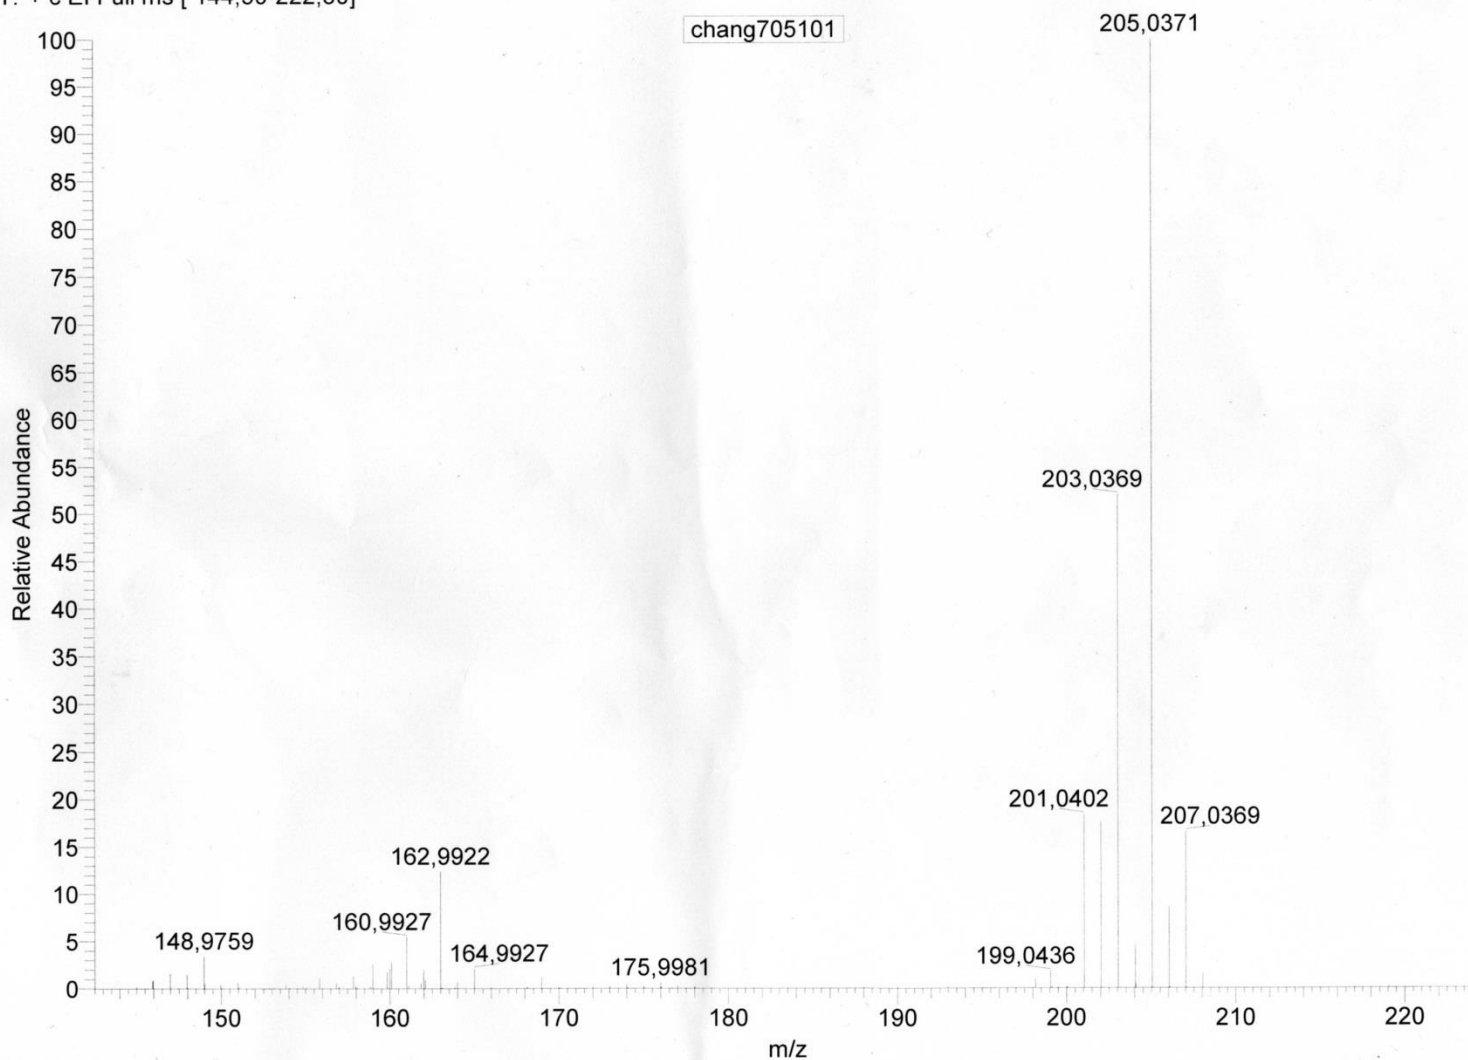

1e HR-MS

Isotope:           Min. .. Max.  
 12 C               0....10  
 1 H                0....20  
 80 Se              0....1  
 78 Se              0....1  
 14 N               0....1  
 Tolerance Window: +- 3.00 mmu  
 Db/Ring Equiv:    0... 100           N-Rule: Do not use  
 Fits:             3                    Charge: 0

File : D:\Xcalibur\data\LIN-15-01\29\lehr-131-cl.RAW  
 Full ms [144.500 - 222.500 ] - Range: 144.500 - 222.500  
 Scan No. 7 of 7

| Mass     | Relative Intensity | Delta [mmu] | Composition                                                                 |
|----------|--------------------|-------------|-----------------------------------------------------------------------------|
| 145.9512 | 0.7                | 0.3         | C <sub>4</sub> H <sub>4</sub> N <sub>1</sub> Se <sub>1</sub>                |
| 145.9674 | 0.9                | 0.0         | C <sub>4</sub> H <sub>4</sub> N <sub>1</sub> <sup>78</sup> Se <sub>1</sub>  |
| 145.9775 | 0.8                | -2.4        | C <sub>4</sub> H <sub>4</sub> <sup>78</sup> Se <sub>1</sub>                 |
| 146.9773 | 1.6                | 2.1         | C <sub>4</sub> H <sub>4</sub> N <sub>1</sub> <sup>78</sup> Se <sub>1</sub>  |
| 147.9689 | 1.5                | 2.4         | C <sub>4</sub> H <sub>4</sub> N <sub>1</sub> Se <sub>1</sub>                |
| 148.9759 | 3.4                | 1.6         | C <sub>4</sub> H <sub>4</sub> N <sub>1</sub> Se <sub>1</sub>                |
| 149.0264 | 0.6                |             |                                                                             |
| 150.9759 | 0.6                |             |                                                                             |
| 155.8378 | 1.1                |             |                                                                             |
| 156.8389 | 0.6                |             |                                                                             |
| 157.8366 | 1.3                | 2.8         | <sup>78</sup> Se <sub>1</sub> Se <sub>1</sub>                               |
| 158.9937 | 2.6                |             |                                                                             |
| 159.8356 | 1.7                |             |                                                                             |
| 159.9947 | 2.1                | -0.8        | C <sub>6</sub> H <sub>10</sub> <sup>78</sup> Se <sub>1</sub>                |
| 160.0921 | 2.9                |             |                                                                             |
| 160.9927 | 5.5                | 1.9         | C <sub>6</sub> H <sub>8</sub> N <sub>1</sub> <sup>78</sup> Se <sub>1</sub>  |
| 161.8359 | 0.5                |             |                                                                             |
| 161.9855 | 2.0                |             |                                                                             |
| 162.0883 | 0.9                |             |                                                                             |
| 162.9922 | 12.4               | 2.2         | C <sub>6</sub> H <sub>8</sub> N <sub>1</sub> Se <sub>1</sub>                |
| 163.9945 | 0.7                |             |                                                                             |
| 164.9927 | 2.1                |             |                                                                             |
| 168.9909 | 1.3                |             |                                                                             |
| 175.9981 | 0.6                | 0.3         | C <sub>6</sub> H <sub>10</sub> N <sub>1</sub> Se <sub>1</sub>               |
| 198.1498 | 1.0                |             |                                                                             |
| 199.0436 | 1.8                |             |                                                                             |
| 201.0402 | 18.4               |             |                                                                             |
| 202.0400 | 17.7               | -2.5        | C <sub>8</sub> H <sub>16</sub> <sup>78</sup> Se <sub>1</sub>                |
| 203.0369 | 52.0               | -0.8        | C <sub>8</sub> H <sub>15</sub> N <sub>1</sub> <sup>78</sup> Se <sub>1</sub> |
| 204.0400 | 4.5                | -1.7        | C <sub>8</sub> H <sub>16</sub> Se <sub>1</sub>                              |
| 205.0371 | 100.0              | 0.2         | C <sub>8</sub> H <sub>15</sub> N <sub>1</sub> Se <sub>1</sub>               |
| 206.0404 | 8.6                |             |                                                                             |
| 207.0369 | 16.6               |             |                                                                             |
| 208.0397 | 1.5                |             |                                                                             |

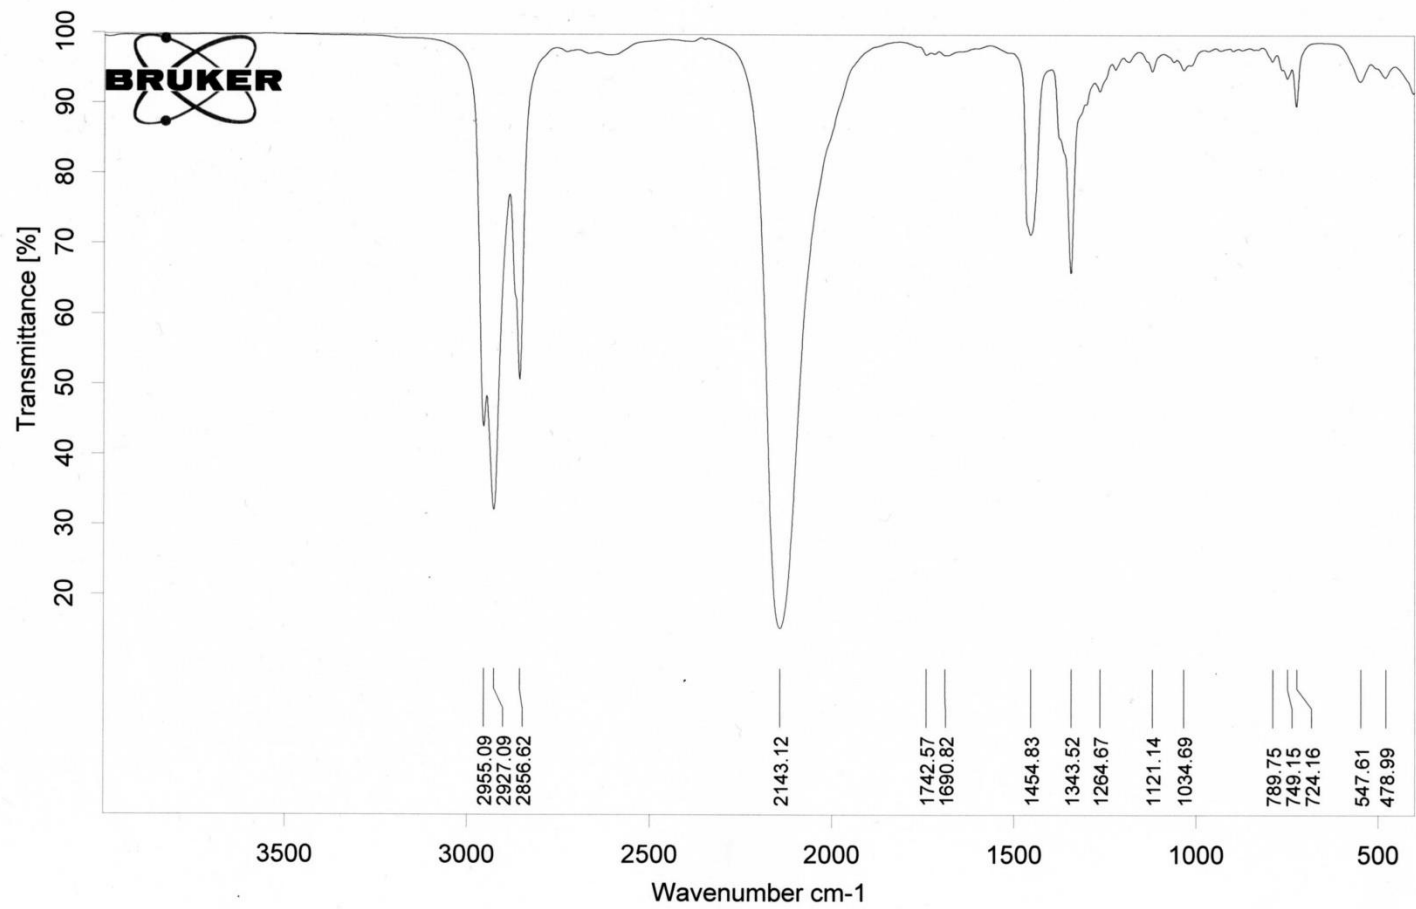

D:\temp-files\FTIR files\201502\20150210\MIR\_TR\_DTGS\_chang705101.0.dpt

PROTON\_01

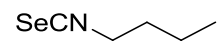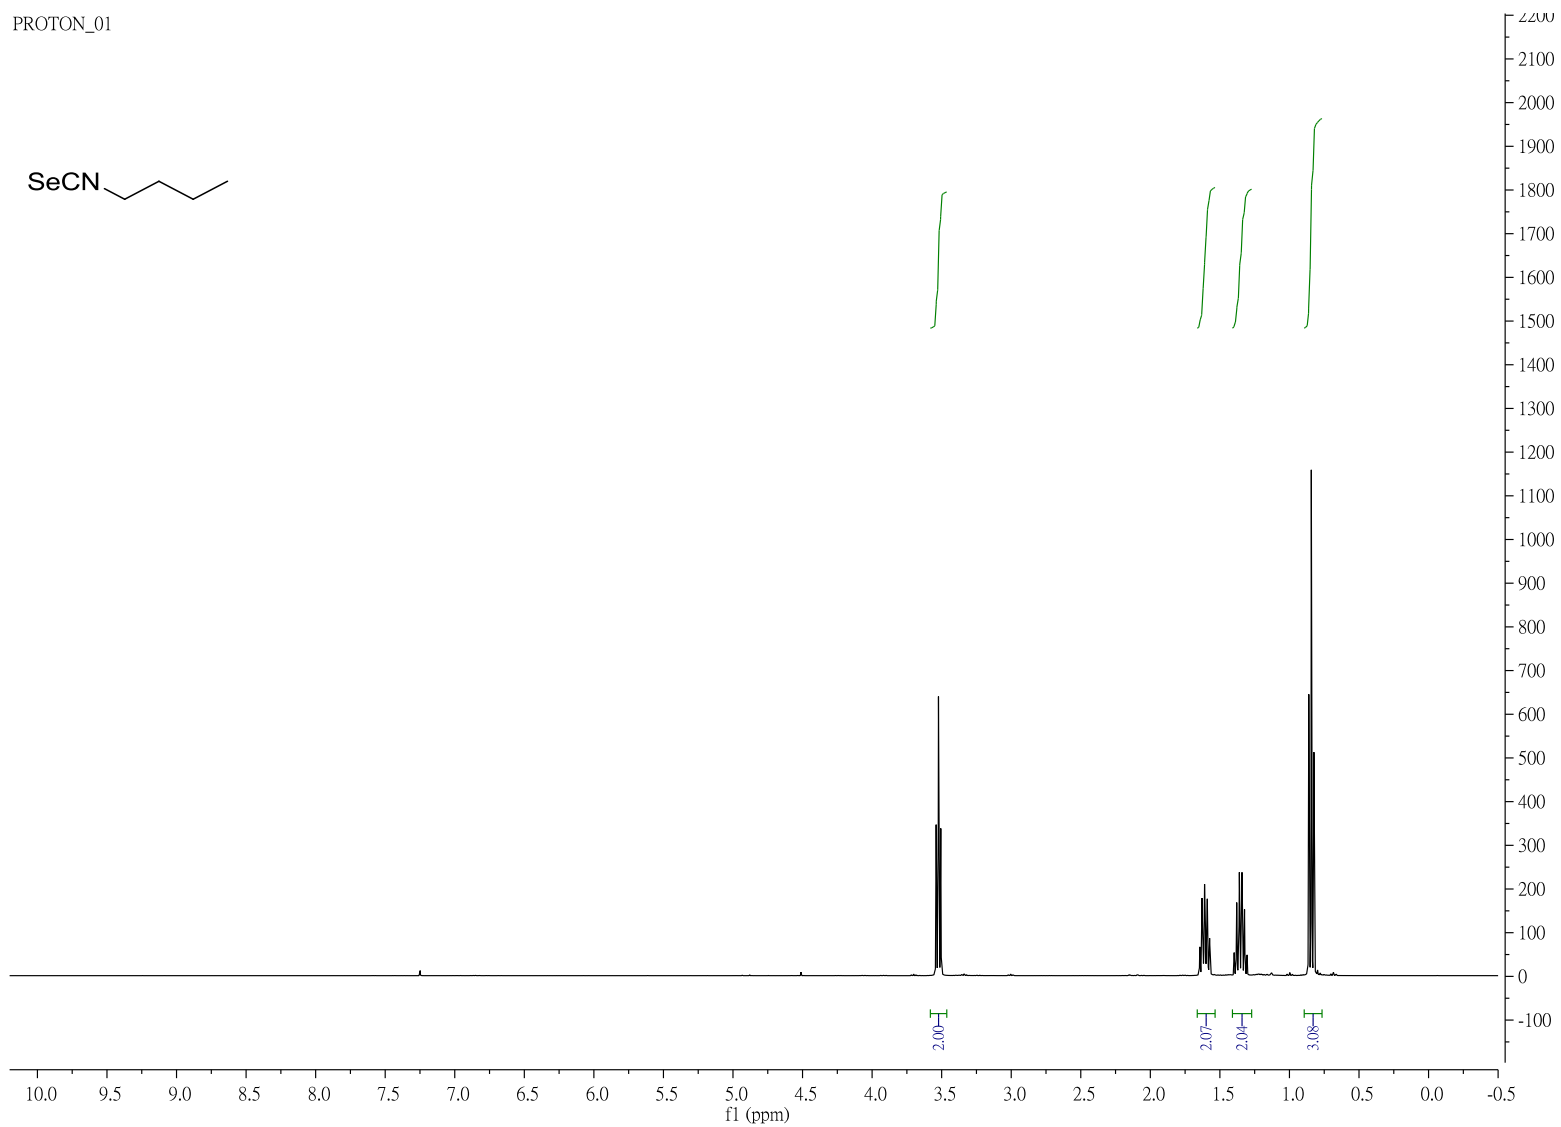

**1f  $^1\text{H}$ -NMR**

S45

CARBON\_01

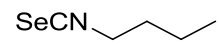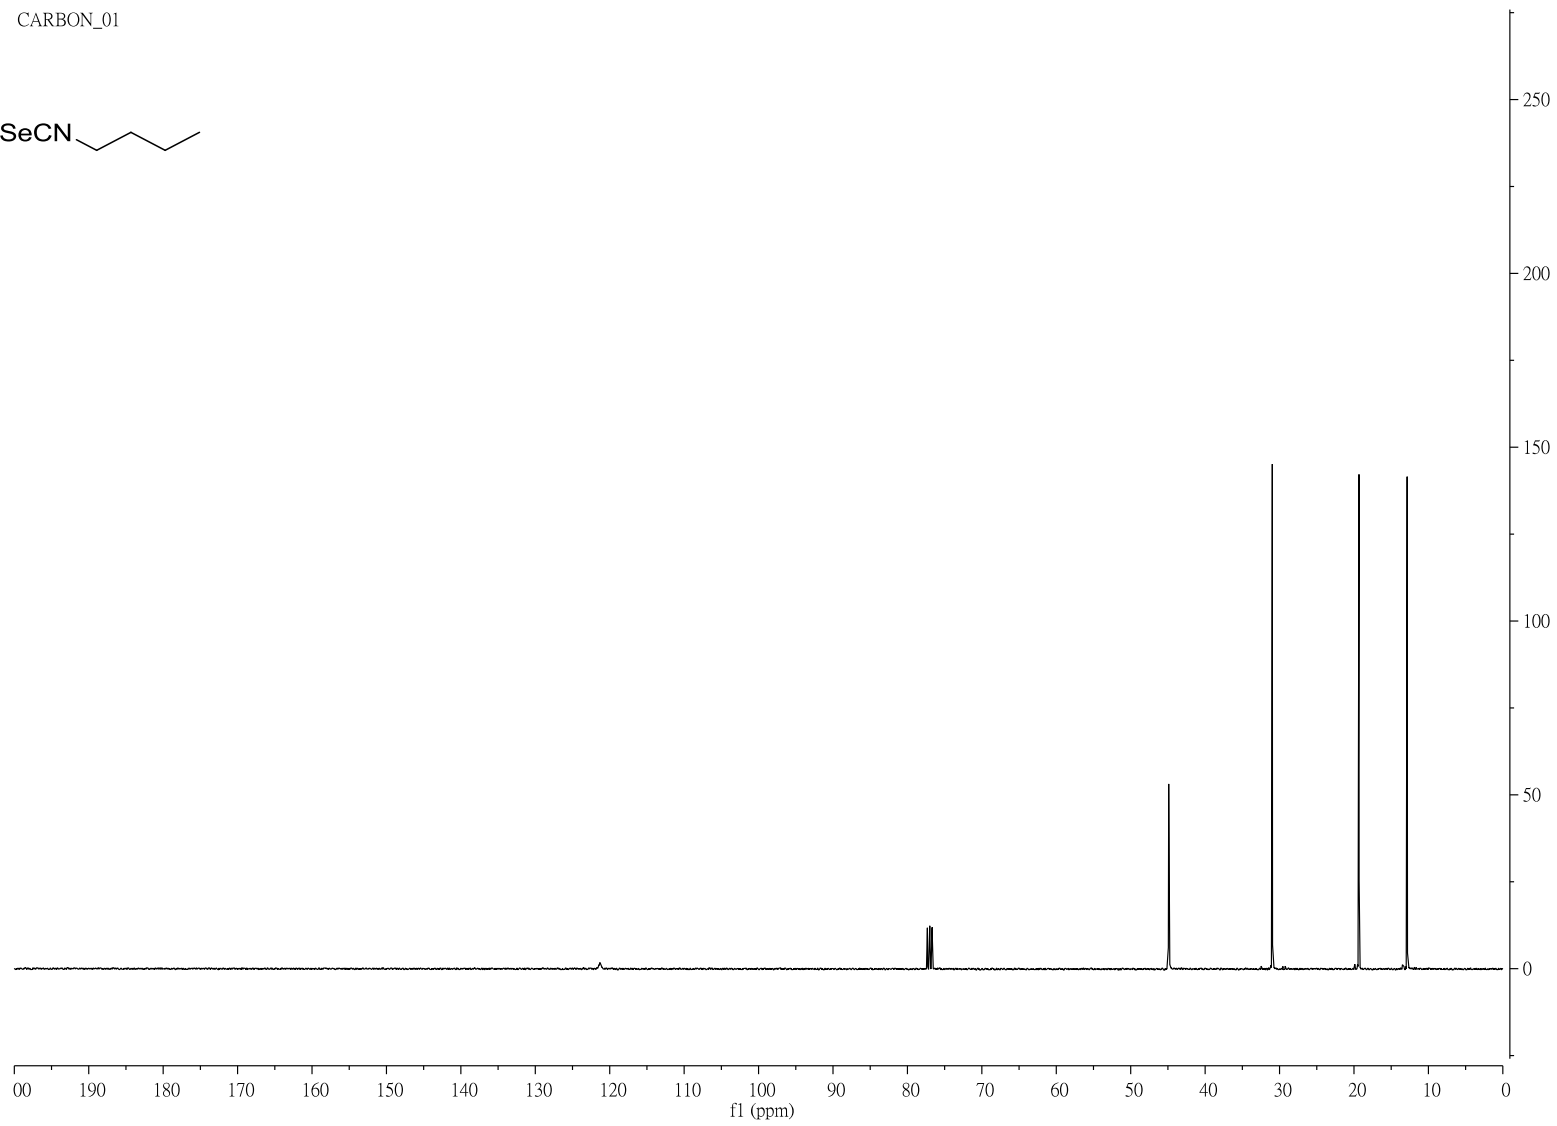

**1f C<sup>13</sup>-NMR**

2014061605\_chang705401\_140616112246 #4 RT: 0.04 AV: 1 NL: 1.27E7  
T: {0,0} + c EI Full ms [50.00-900.00]

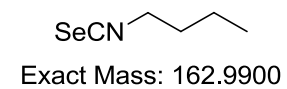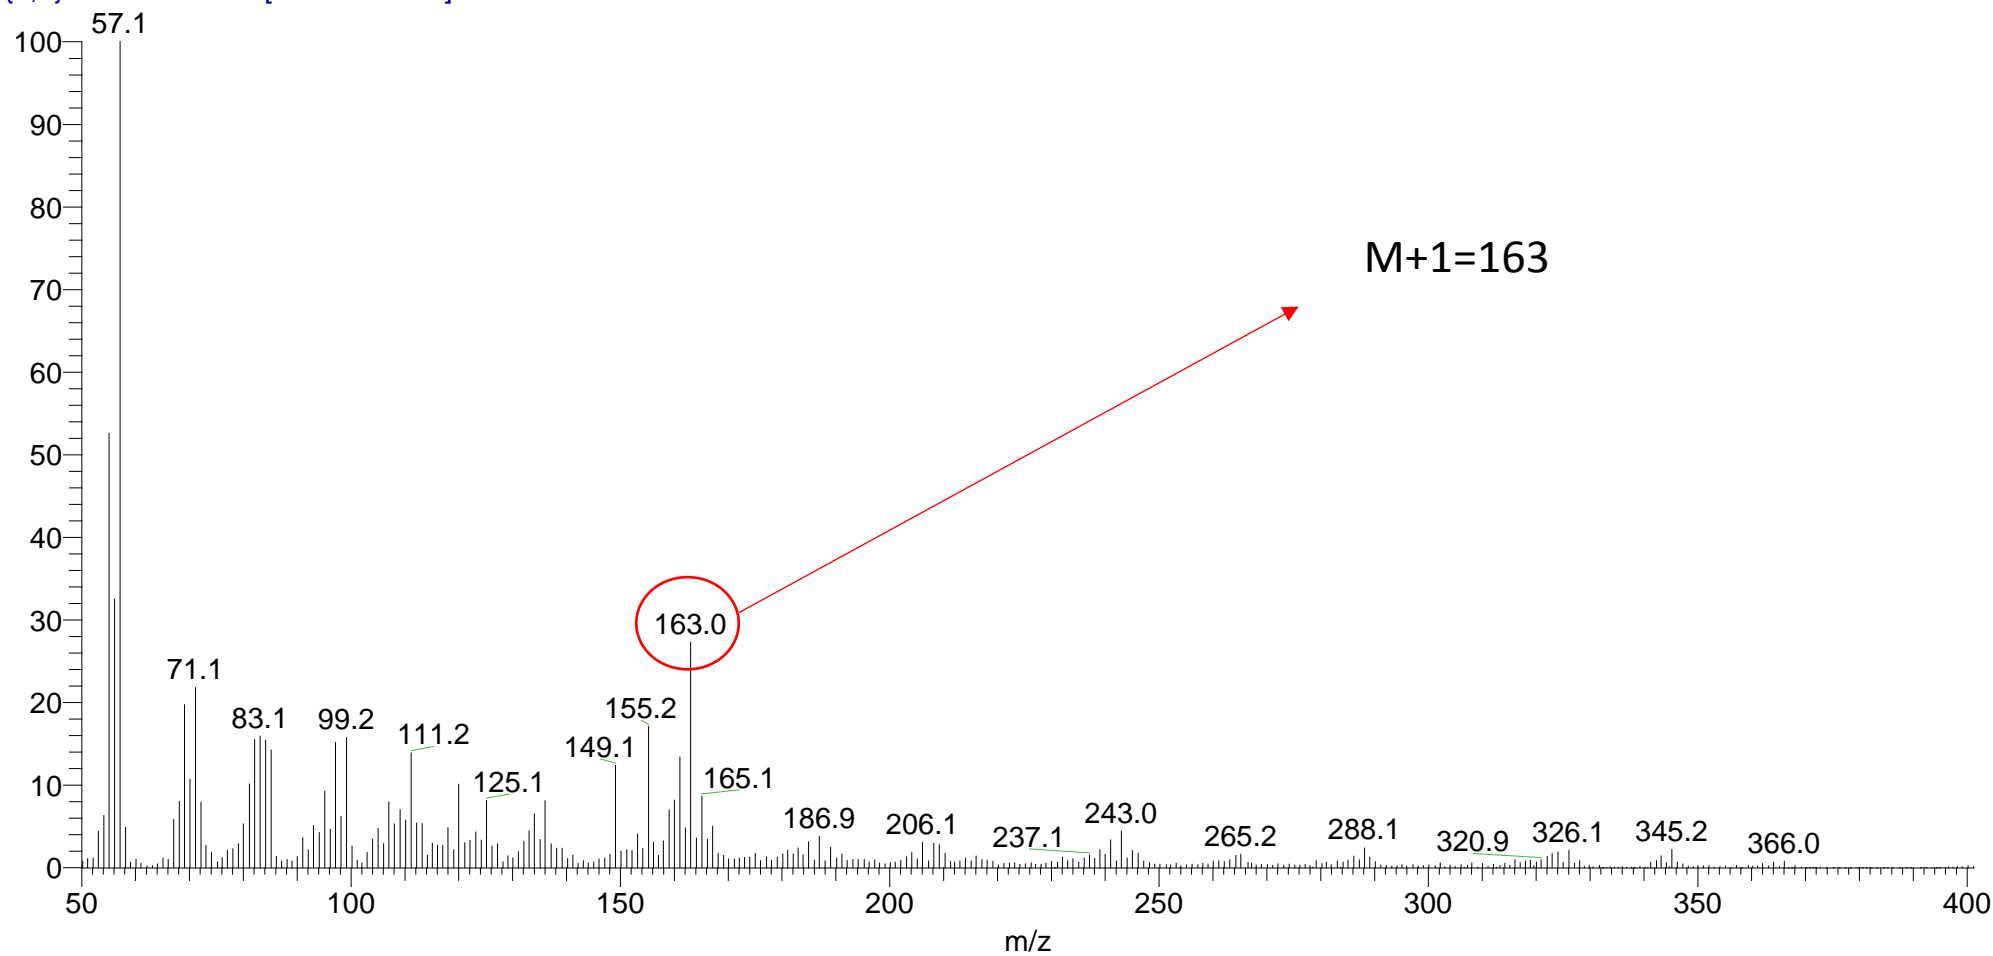

1f LR-MS

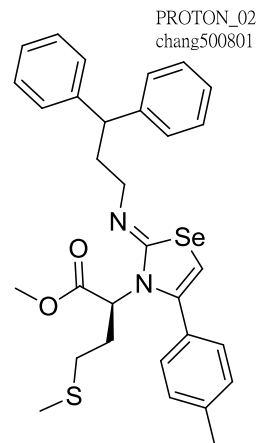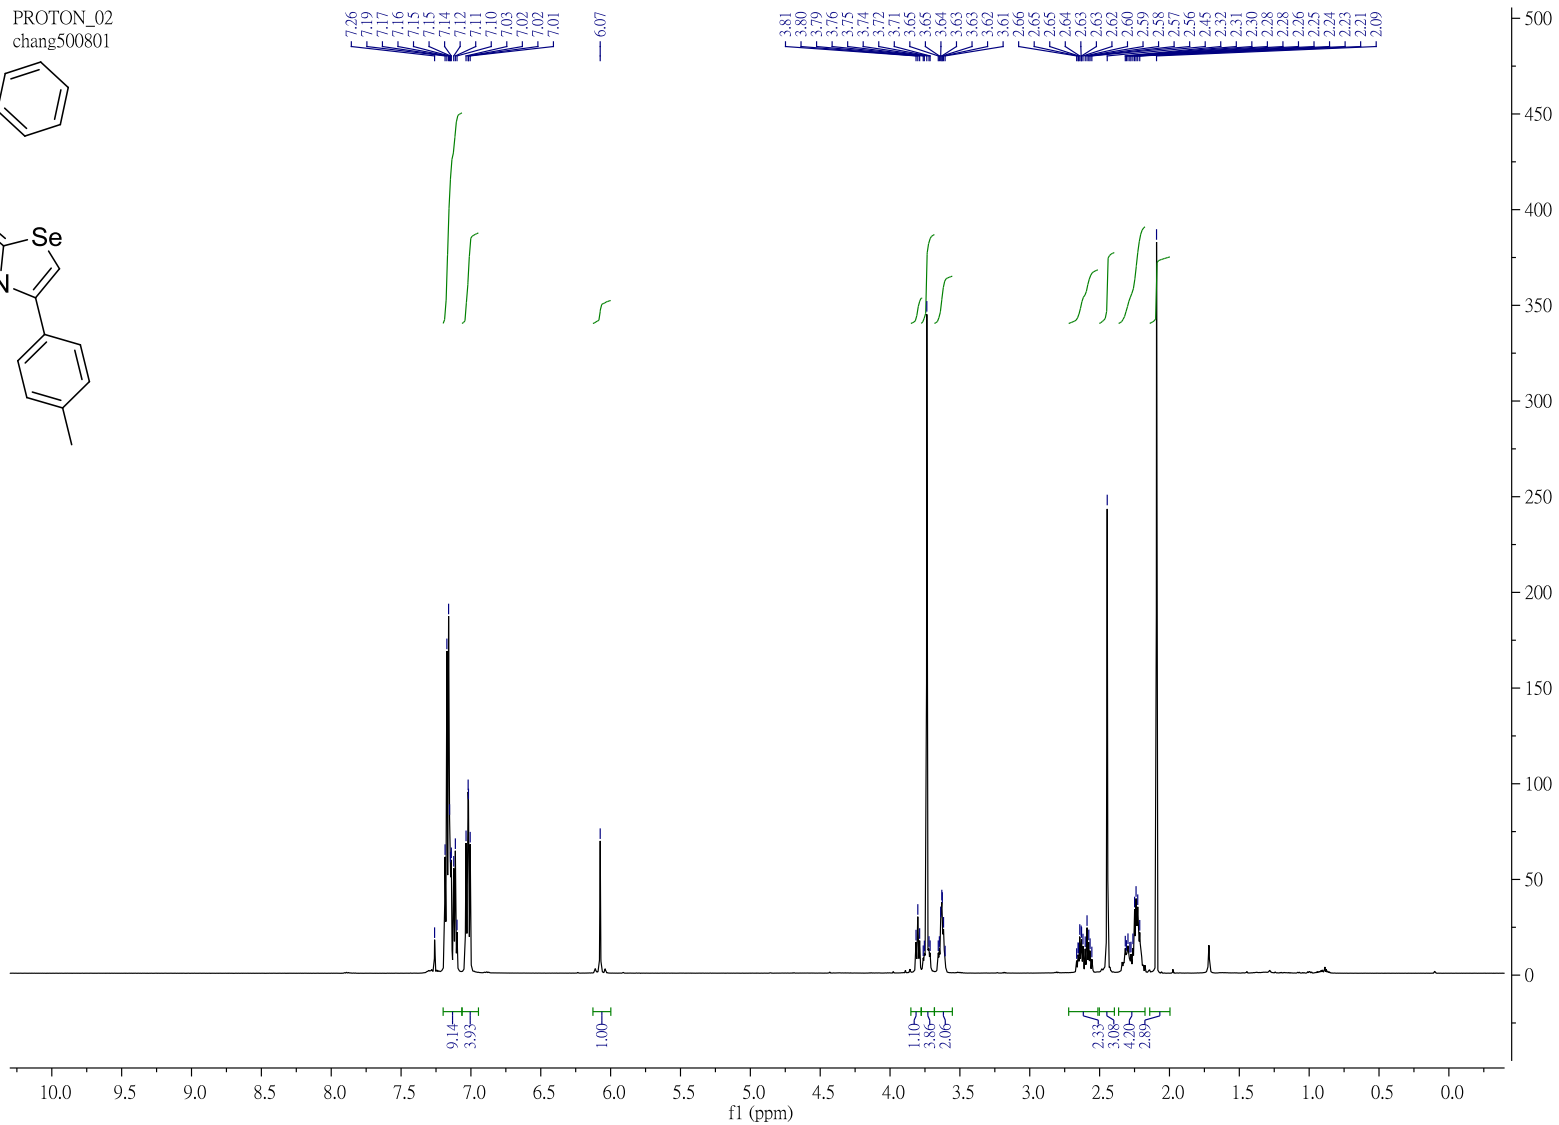

**5a**  $^1\text{H-NMR}$



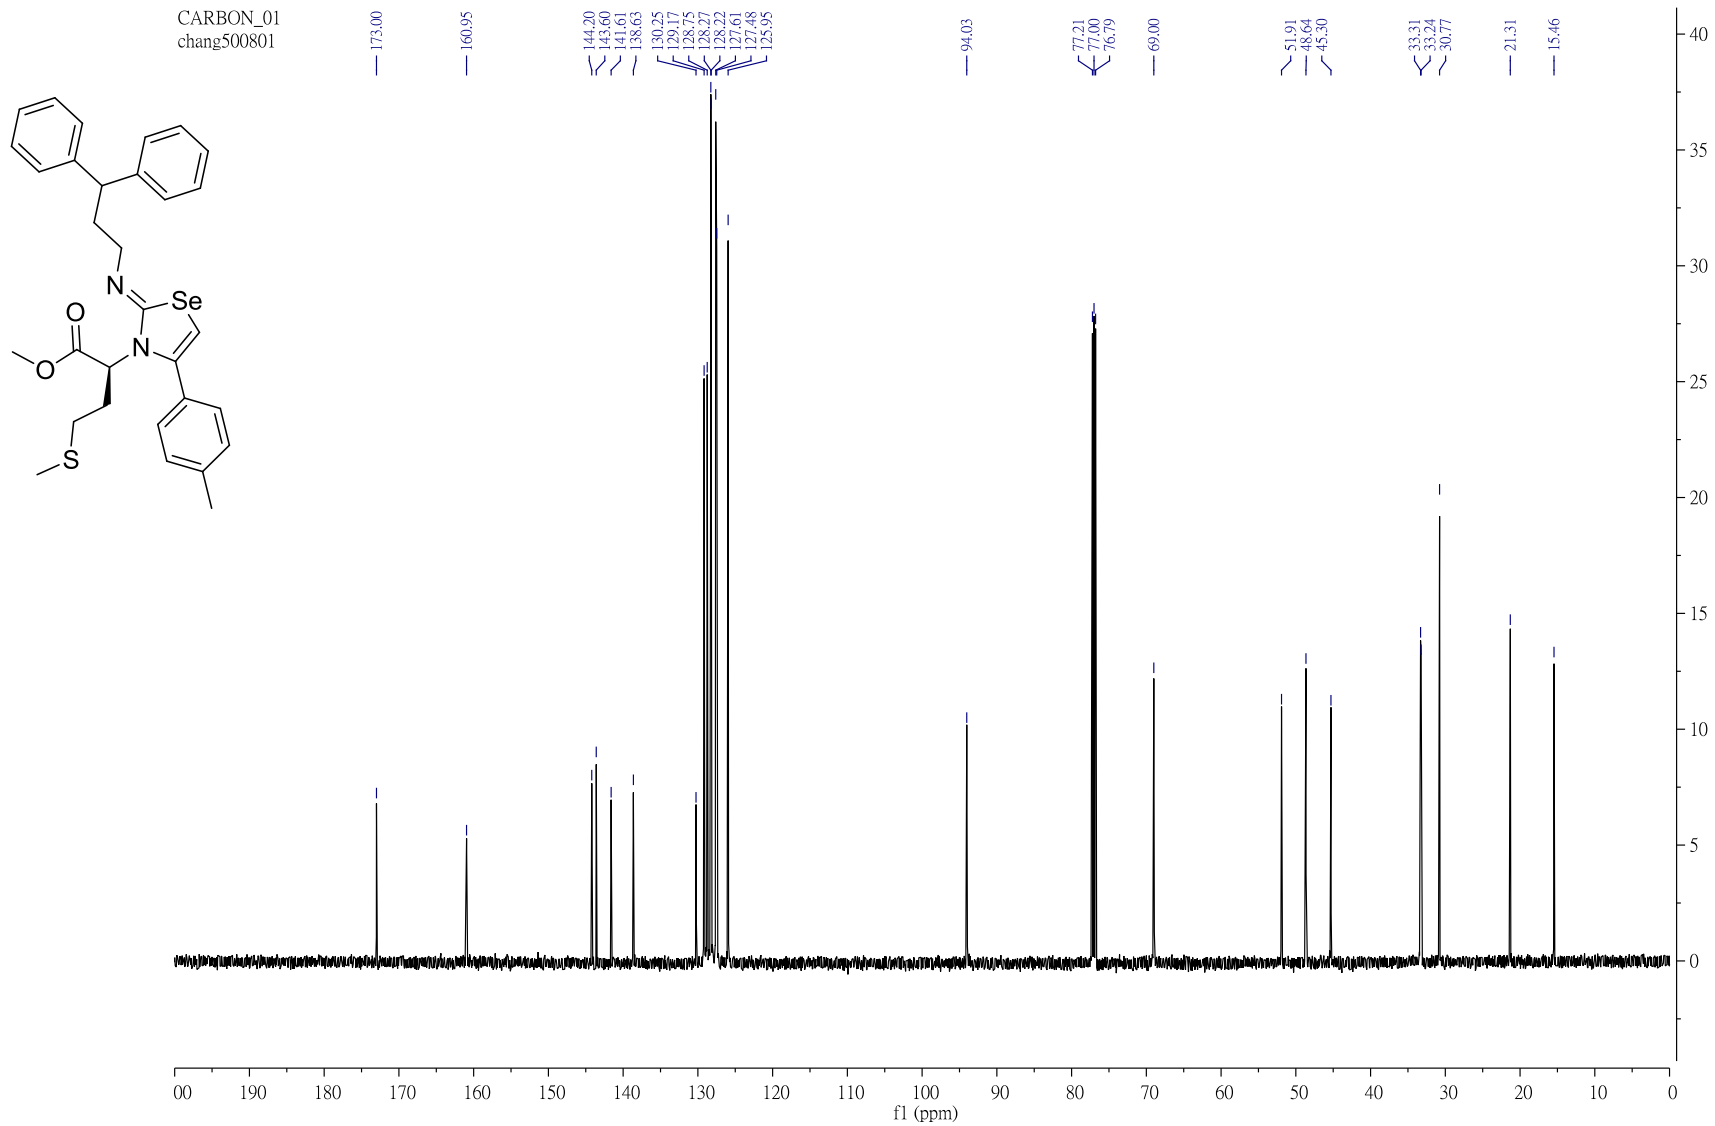

**5a C<sup>13</sup>-NMR**

chang500801

Sample Name:  
chang500801  
Data Collected on:  
localhost.localdomain-vmwrs600  
Archive directory:  
/home/suncm/vnmrsws/data  
Sample directory:  
chang500801\_20111024\_01  
FidFile: DEPT\_02

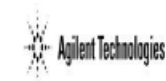

Pulse Sequence: DEPT  
Solvent: cdcl3  
Data collected on: Oct 24 2011

Temp. 25.0 C / 298.1 K  
Operator: chang

Relax. delay 1.000 sec  
Pulse 90.0 degrees  
Acq. time 0.865 sec  
Width 37878.8 Hz  
32 repetitions  
OBSERVE c13, 150.8029851 MHz  
DECOUPLE H1, 599.7359663 MHz  
Power 43 dB  
on during acquisition  
off during delay  
WALTZ-16 modulated  
DATA PROCESSING  
Line broadening 1.0 Hz  
FT size 65536  
Total time 12 min

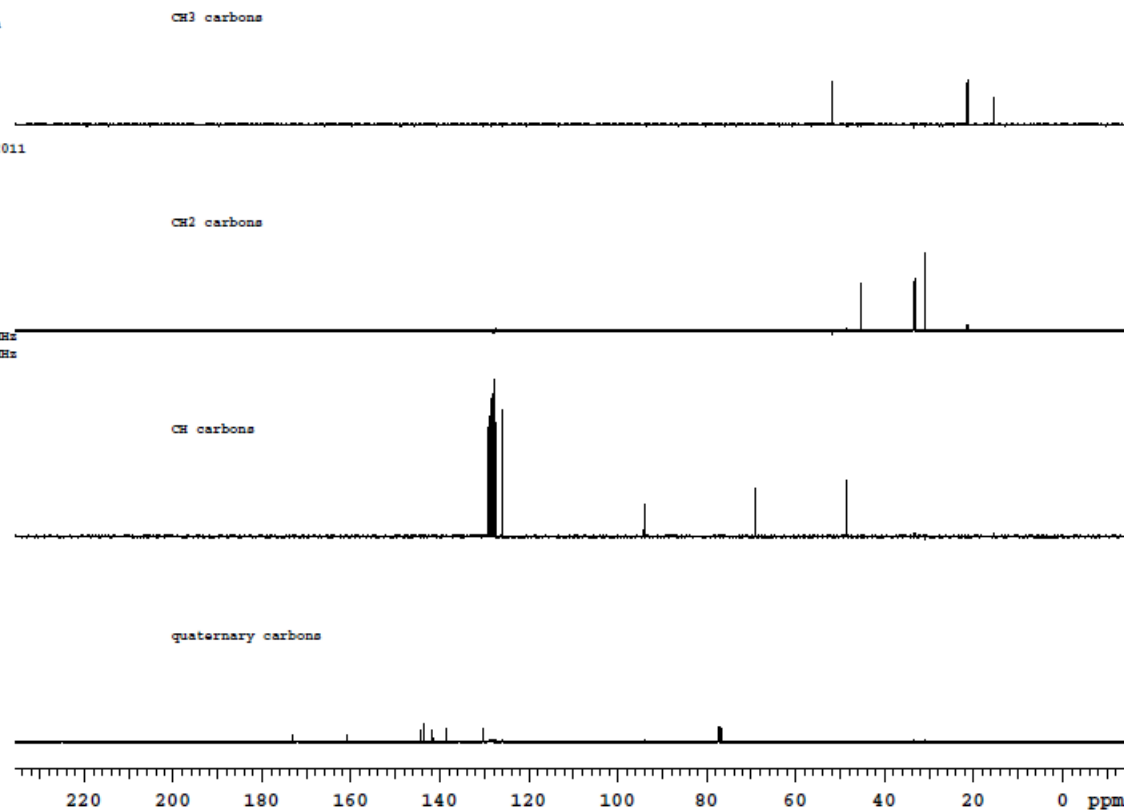

Plotname: DEPT\_02\_plot01

## 5a DEPT

Chang 500901

20111025-2 338 (3.411) Cm (338:348-1:249)

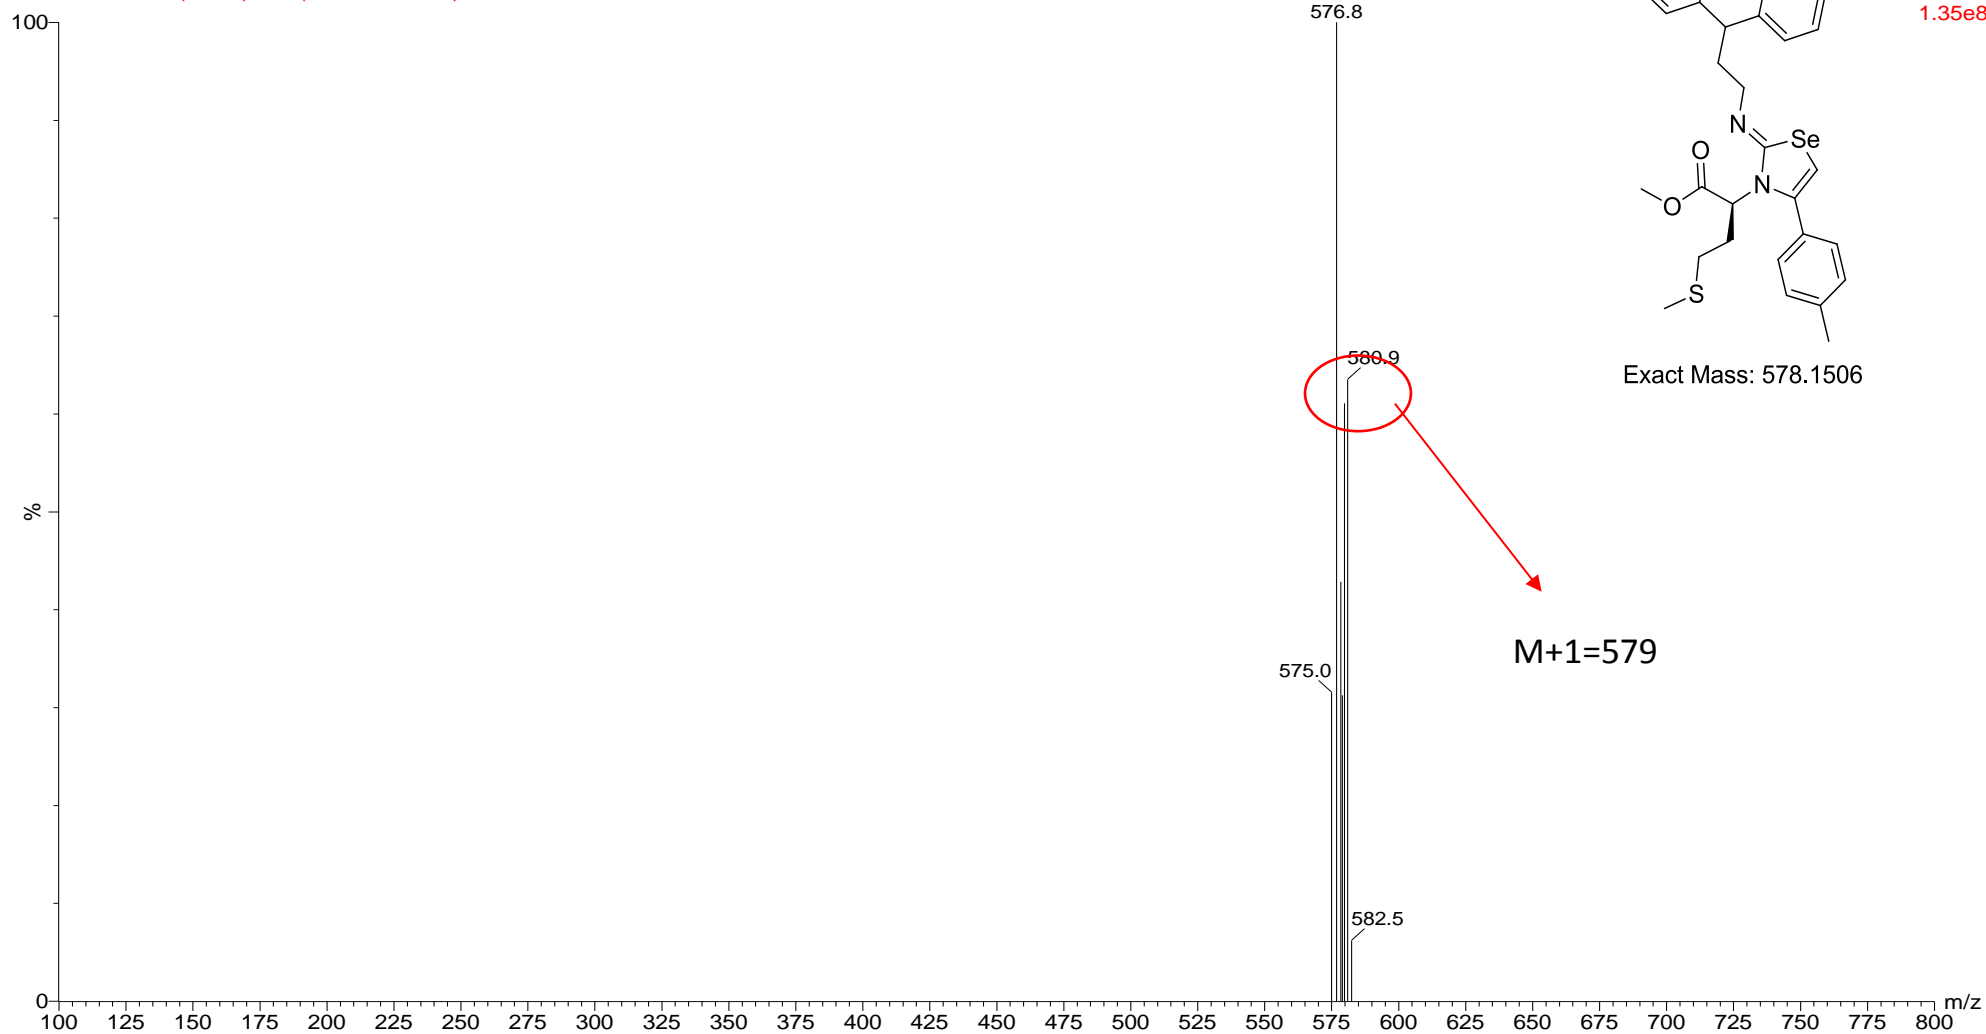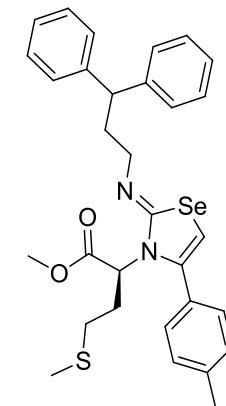

Scan ES+  
1.35e8

Exact Mass: 578.1506

5a LR-MS

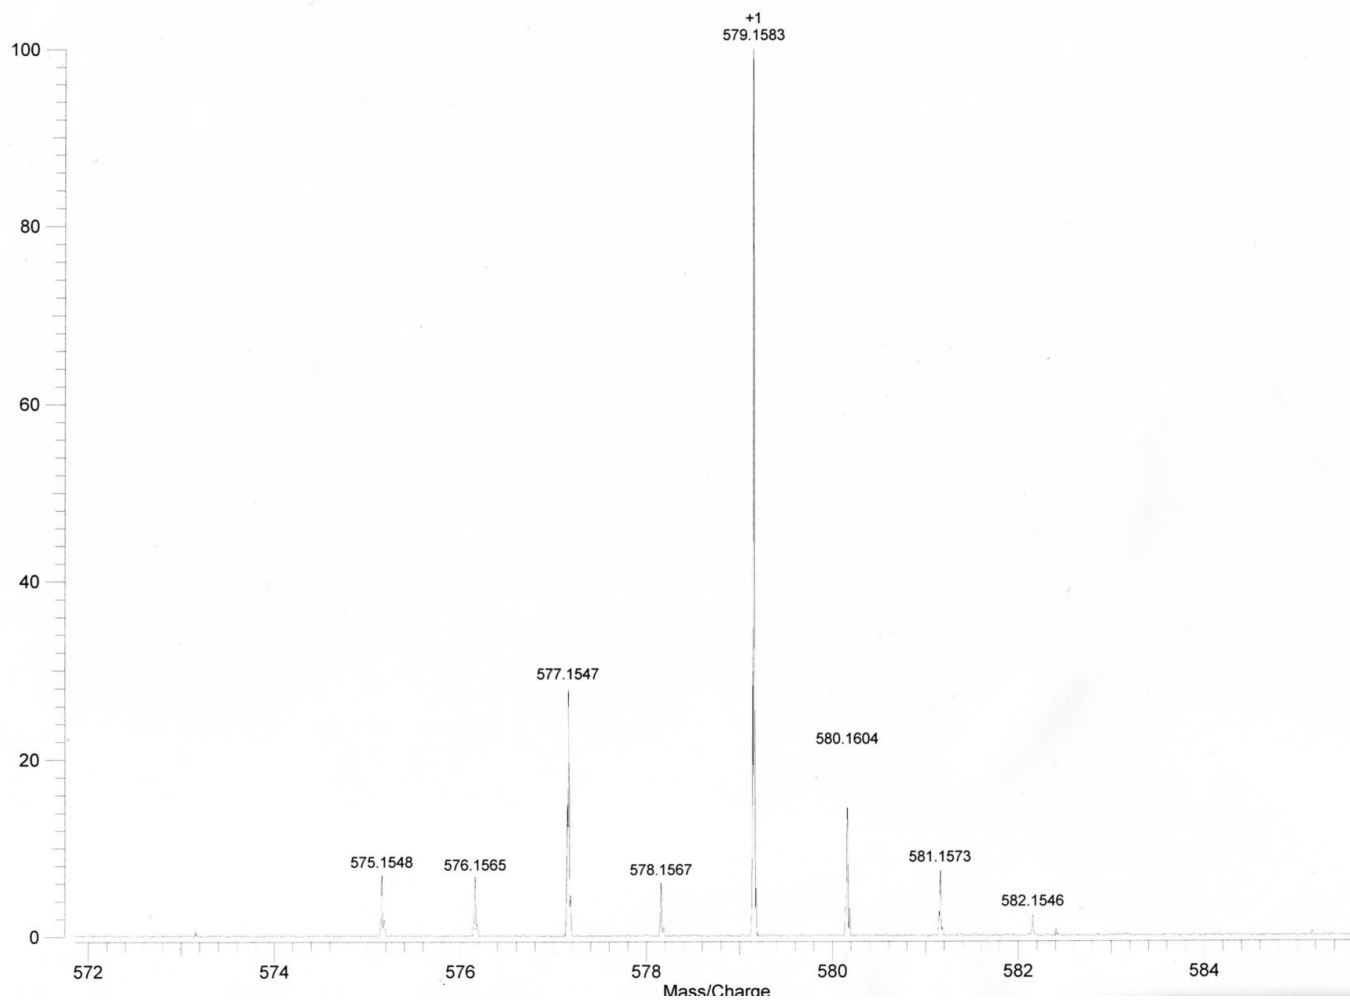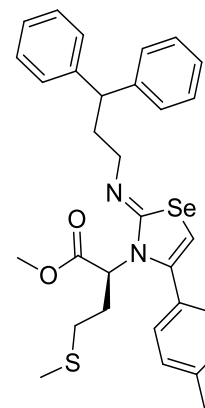

Exact Mass: 578.1506

### 5a HR-MS

File: C:\Program Files\Omega\DataFiles\2012-01\SMS0053002012010103-15007-+-10-3.trans  
Acquired: 12-JAN-2012 10:48:33

| <i>Mass</i> | <i>Ampl.</i> | <i>Rel. Ampl.</i> |
|-------------|--------------|-------------------|
| 107.00091   | 0.5          | 0.51              |
| 109.12527   | 0.3          | 0.35              |
| 128.24300   | 0.5          | 0.54              |
| 179.19543   | 0.5          | 0.56              |
| 192.04721   | 0.3          | 0.38              |
| 192.05102   | 0.7          | 0.75              |
| 217.13208   | 0.4          | 0.39              |
| 245.25071   | 0.4          | 0.46              |
| 245.25301   | 1.0          | 1.09              |
| 287.57089   | 0.8          | 0.87              |
| 287.58002   | 0.5          | 0.60              |
| 288.57782   | 1.8          | 1.97              |
| 306.81349   | 0.4          | 0.47              |
| 306.81837   | 0.4          | 0.42              |
| 344.01505   | 0.6          | 0.68              |
| 344.01699   | 0.6          | 0.69              |
| 344.02681   | 0.6          | 0.61              |
| 344.04321   | 0.5          | 0.59              |
| 344.06459   | 1.0          | 1.07              |
| 344.07354   | 0.6          | 0.70              |
| 359.31384   | 2.7          | 2.92              |
| 375.10890   | 0.4          | 0.45              |
| 375.28736   | 1.0          | 1.14              |
| 394.44883   | 0.7          | 0.72              |
| 394.62020   | 0.5          | 0.57              |
| 407.29773   | 2.6          | 2.91              |
| 412.25496   | 0.7          | 0.72              |
| 415.34370   | 0.4          | 0.44              |
| 423.27131   | 0.7          | 0.77              |
| 426.32896   | 0.6          | 0.60              |
| 429.23177   | 0.5          | 0.56              |
| 434.23306   | 0.5          | 0.58              |
| 436.18325   | 18.1         | 19.83             |
| 437.32612   | 3.5          | 3.81              |
| 450.20961   | 0.6          | 0.66              |
| 452.15618   | 7.8          | 8.62              |
| 452.16763   | 0.6          | 0.64              |

| <i>Mass</i> | <i>Ampl.</i> | <i>Rel. Ampl.</i> |
|-------------|--------------|-------------------|
| 453.29030   | 1.1          | 1.25              |
| 478.24083   | 0.5          | 0.57              |
| 515.32430   | 0.7          | 0.77              |
| 516.52432   | 0.8          | 0.85              |
| 516.58577   | 0.5          | 0.53              |
| 516.60415   | 0.6          | 0.65              |
| 531.30235   | 1.2          | 1.26              |
| 567.28011   | 0.5          | 0.59              |
| 572.14926   | 0.5          | 0.54              |
| 574.14692   | 10.0         | 11.00             |
| 574.17072   | 2.5          | 2.79              |
| 576.14212   | 15.3         | 16.81             |
| 576.14684   | 20.5         | 22.56             |
| 576.16788   | 4.3          | 4.74              |
| 577.14128   | 2.4          | 2.63              |
| 578.13647   | 22.3         | 24.52             |
| 578.15046   | 91.0         | 100.00            |
| 578.16702   | 7.4          | 8.13              |
| 580.13944   | 3.7          | 4.12              |
| 580.14485   | 5.8          | 6.35              |
| 581.39565   | 0.6          | 0.70              |
| 584.15410   | 0.4          | 0.44              |
| 594.13672   | 0.4          | 0.43              |
| 600.12270   | 0.4          | 0.46              |
| 658.06300   | 0.9          | 1.02              |
| 658.55330   | 0.6          | 0.70              |
| 696.63929   | 1.6          | 1.81              |

5a HR-MS

S53

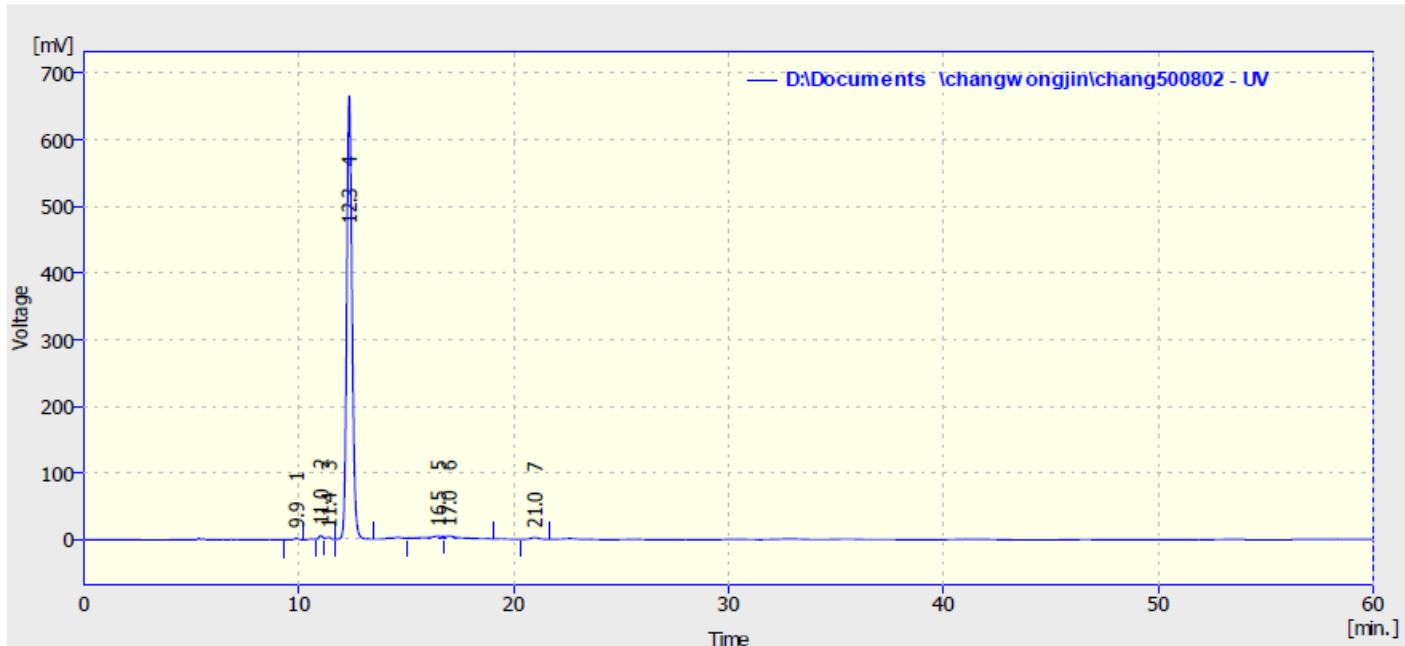

Result Table (Uncal - D:\Documents \changwongjin\chang500802 - UV)

|   | Reten. Time [min] | Area [mV.s] | Height [mV] | Area [%] | Height [%] |
|---|-------------------|-------------|-------------|----------|------------|
| 1 | 9.884             | 25.193      | 2.248       | 0.2      | 0.3        |
| 2 | 11.020            | 74.003      | 5.942       | 0.6      | 0.9        |
| 3 | 11.404            | 50.088      | 3.160       | 0.4      | 0.5        |
| 4 | 12.344            | 11499.032   | 664.988     | 95.3     | 96.9       |
| 5 | 16.492            | 160.982     | 3.639       | 1.3      | 0.5        |
| 6 | 16.980            | 181.835     | 3.782       | 1.5      | 0.6        |
| 7 | 20.988            | 76.680      | 2.545       | 0.6      | 0.4        |
|   | Total             | 12067.813   | 686.305     | 100.0    | 100.0      |

### 5a chiral HPLC

SAMPLE : -----  
 ID # : 002  
 LAMP λ : 589 nm  
 CONC : 0.03000 g/ml  
 CELL LG: 010 mm  
 TEMP CORR: +0.00037  
 INTERVAL: 1 min

SPECIFIC ROTATION [α]  
 COUNT [α](°) TEMP(°C)  
 01 - 64.3340 18.2  
 02 - 65.8339 18.2  
 03 - 66.8340 18.2  
 04 - 67.3339 18.2  
 05 - 67.8340 18.2  
 06 - 68.1673 18.2  
 07 - 68.6672 18.3  
 08 - 68.6672 18.3  
 09 - 68.8339 18.3  
 10 - 69.1672 18.3

MEAN = - 67.5673°  
 σ(N-1) = 1.5299°  
 C. V. = 2.2643%

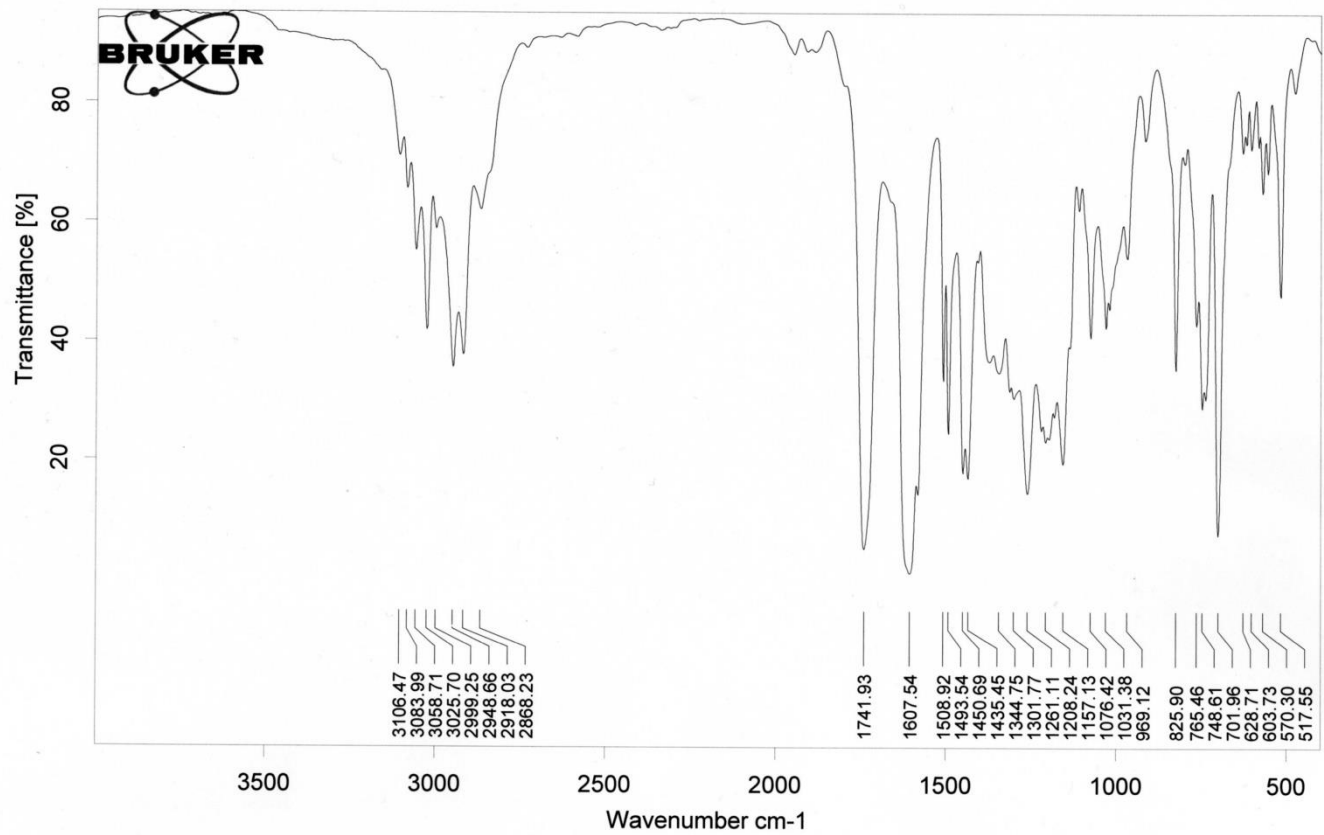

D:\temp-files\FTIR files\201501\20150121\MIR\_TR\_DTGS\_blank KBr\_chang500801.0.dpt

603202\_20130507\_02

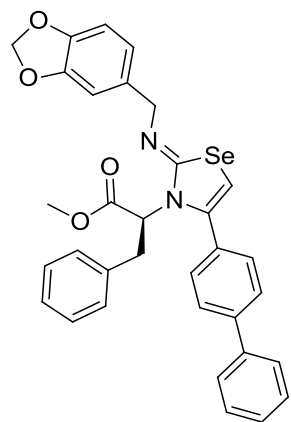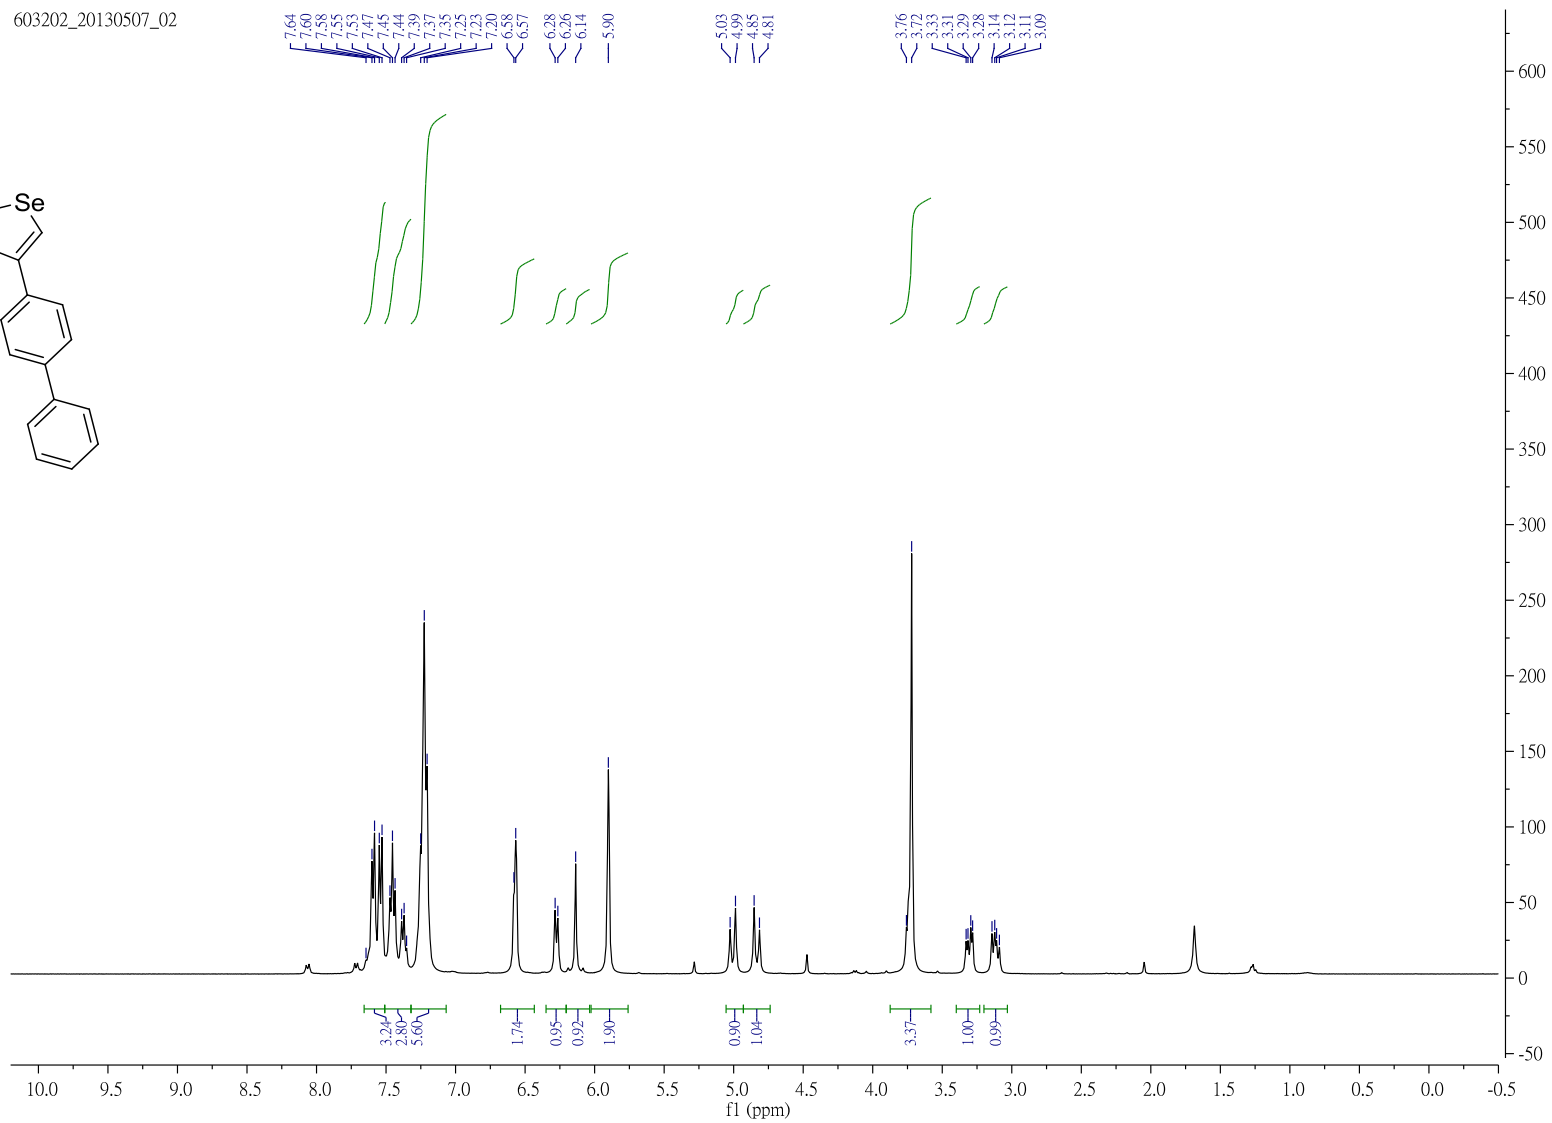

5b  $^1\text{H}$ NMR



603202\_20130507\_03

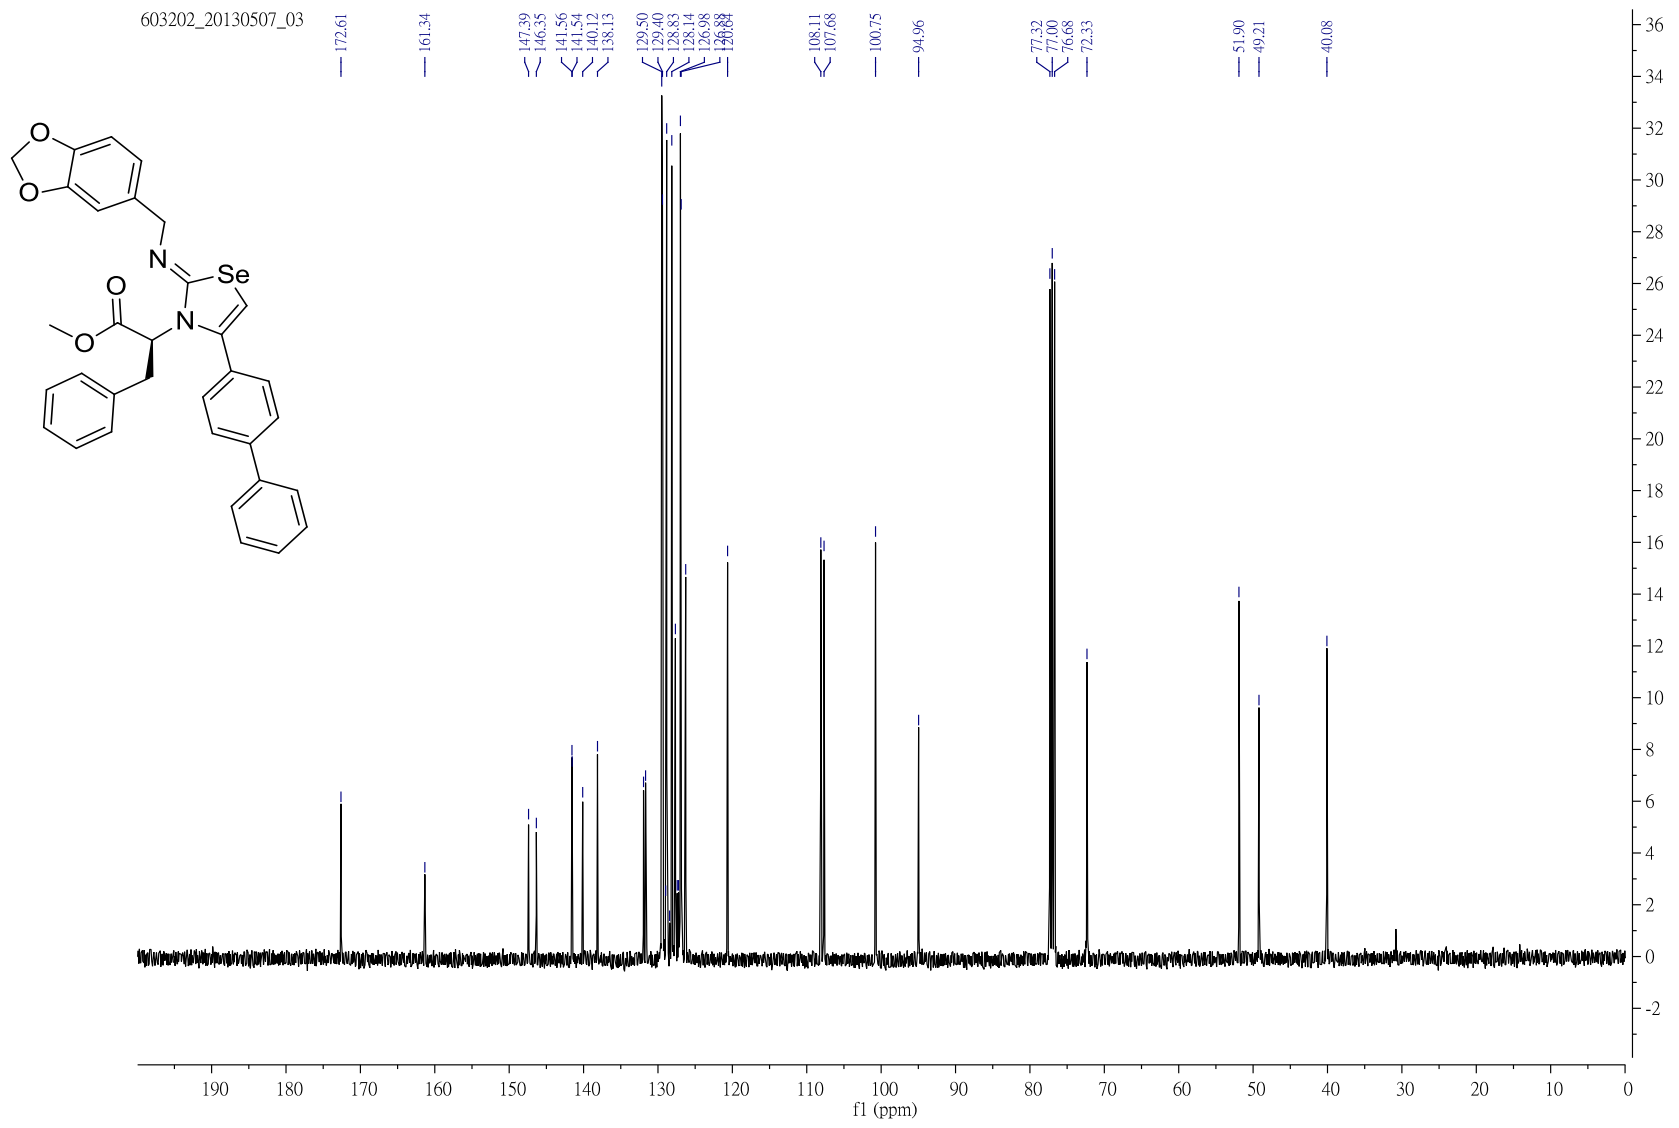

5b  $C^{13}$  NMR

chang503401

20120131-04 122 (8.357) Cn (Cen,2, 80.00, Ht); Sm (Mn, 2x0.75); Sb (3,40.00 ); Cm (121:124-1:113x5.000)

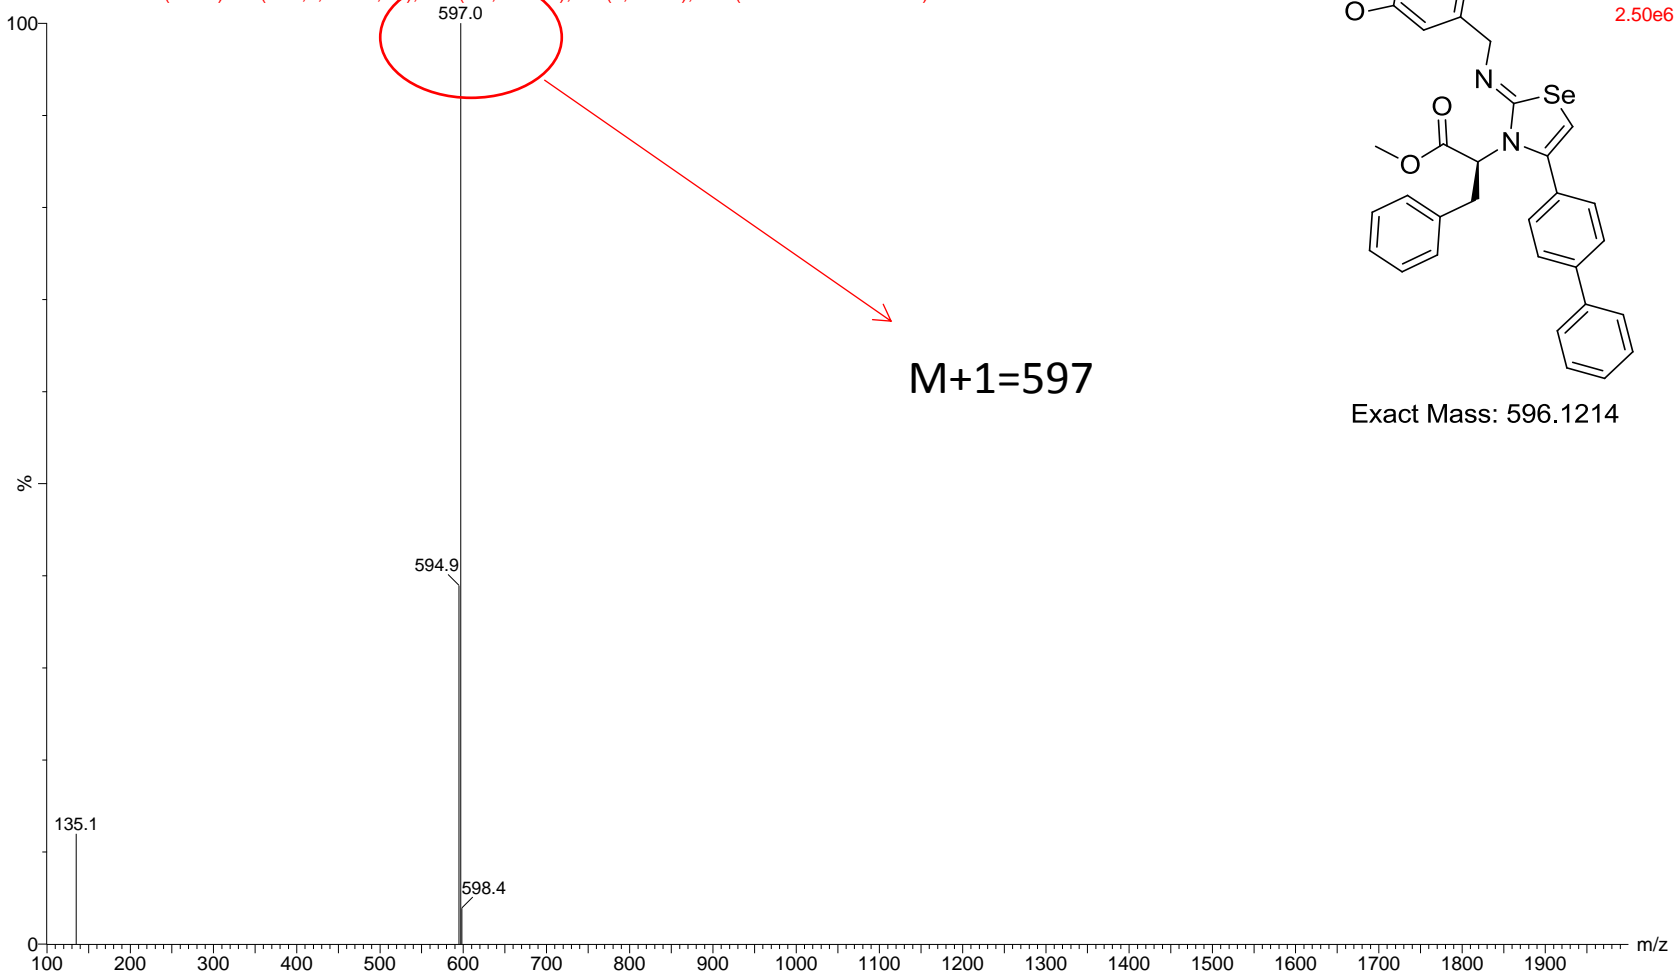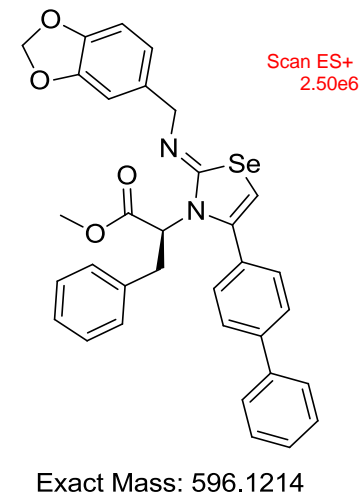

5b LR-MS

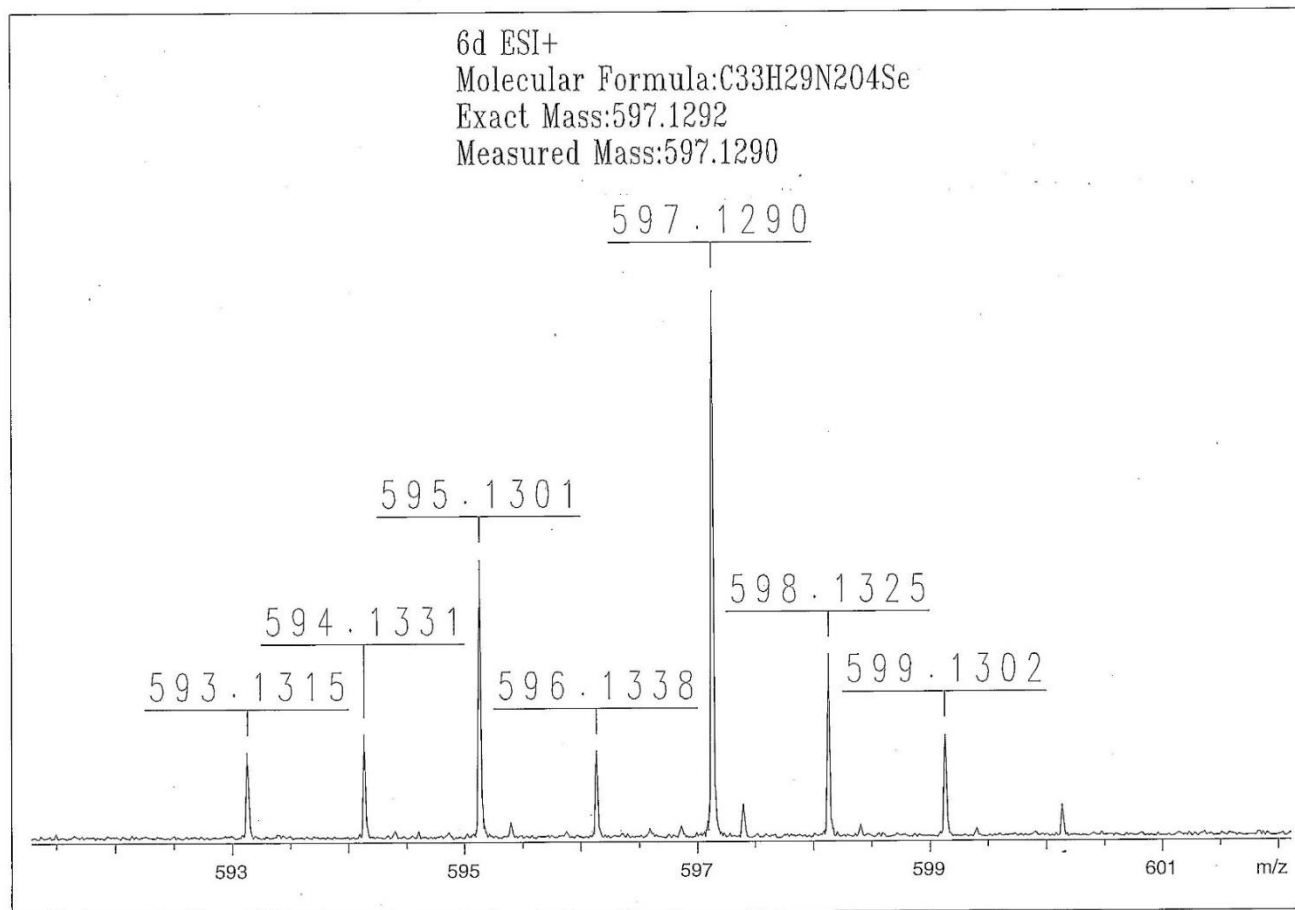

/d=/Data/yu/6d/4/pdata/1 Administrator Thu Aug 1 15:25:45 2013

**5b HR-MS**

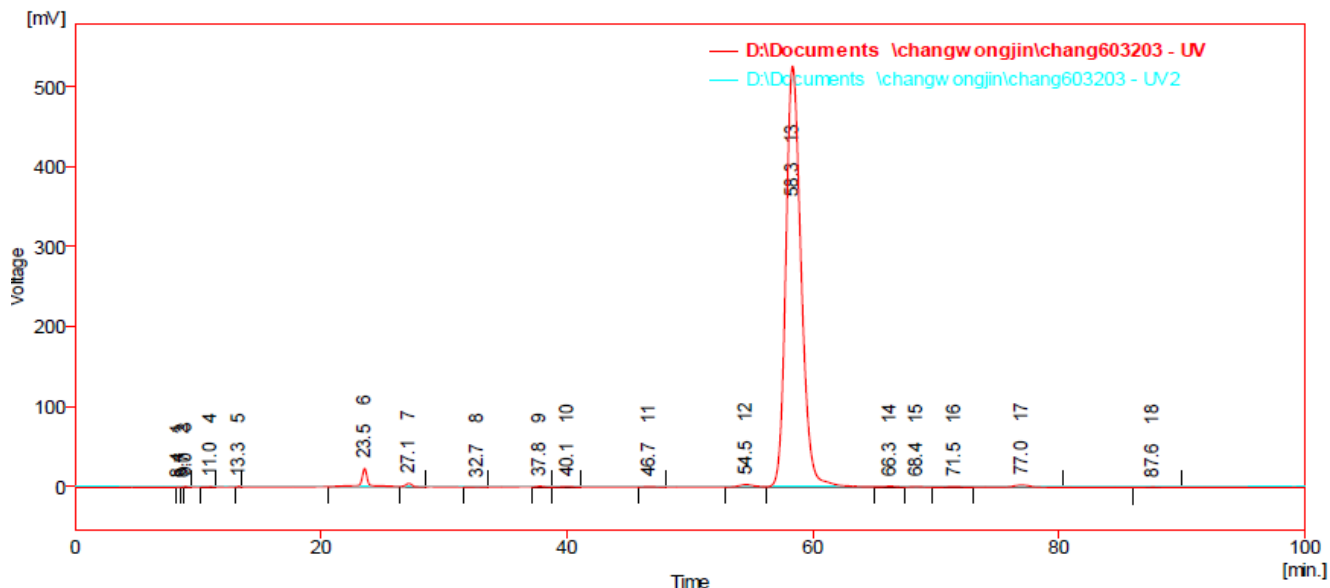

Result Table (Uncal - D:\Documents \changwongjin\chang603203 - UV)

|    | Reten. Time [min] | Area [mV.s] | Height [mV] | Area [%] | Height [%] |
|----|-------------------|-------------|-------------|----------|------------|
| 1  | 8.356             | 3.179       | 0.307       | 0.0      | 0.1        |
| 2  | 8.724             | 2.685       | 0.269       | 0.0      | 0.0        |
| 3  | 8.968             | 14.837      | 1.075       | 0.0      | 0.2        |
| 4  | 11.028            | 15.909      | 1.019       | 0.0      | 0.2        |
| 5  | 13.312            | 15.732      | 1.113       | 0.0      | 0.2        |
| 6  | 23.540            | 851.844     | 22.864      | 1.8      | 4.0        |
| 7  | 27.140            | 158.060     | 4.313       | 0.3      | 0.8        |
| 8  | 32.720            | 19.286      | 0.359       | 0.0      | 0.1        |
| 9  | 37.772            | 32.365      | 0.867       | 0.1      | 0.2        |
| 10 | 40.064            | 37.008      | 0.708       | 0.1      | 0.1        |
| 11 | 46.704            | 34.257      | 0.547       | 0.1      | 0.1        |
| 12 | 54.544            | 248.861     | 2.877       | 0.5      | 0.5        |
| 13 | 58.344            | 45448.384   | 526.052     | 95.8     | 92.6       |
| 14 | 66.292            | 102.885     | 1.079       | 0.2      | 0.2        |
| 15 | 68.432            | 65.018      | 0.864       | 0.1      | 0.2        |
| 16 | 71.504            | 77.580      | 0.784       | 0.2      | 0.1        |
| 17 | 76.976            | 283.044     | 2.770       | 0.6      | 0.5        |
| 18 | 87.632            | 27.622      | 0.282       | 0.1      | 0.0        |
|    | Total             | 47438.556   | 568.147     | 100.0    | 100.0      |

Result Table (Uncal - D:\Documents \changwongjin\chang603203 - UV2)

| Reten. Time [min] | Area [mV.s] | Height [mV] | Area [%] | Height [%] |
|-------------------|-------------|-------------|----------|------------|
| No peak to report |             |             |          |            |

### 5b chiral HPLC

SAMPLE : -----  
 ID # : 001  
 LAMP λ : 589 nm  
 CONC : 0.04000 g/ml  
 CELL LG: 010 mm  
 TEMP CORR: +0.00037  
 INTERVAL: 1 min

SPECIFIC ROTATION [α]  
 COUNT [α](°) TEMP(°C)  
 01 -215.6260 18.1  
 02 -216.1260 18.2  
 03 -217.0010 18.2  
 04 -216.6260 18.2  
 05 -216.7510 18.2  
 06 -217.7510 18.2  
 07 -219.2510 18.2  
 08 -219.2510 18.2  
 09 -219.6260 18.2  
 10 -220.8760 18.2

MEAN = -217.8880°  
 σ(N-1) = 1.7504°  
 C.V. = 0.80337%

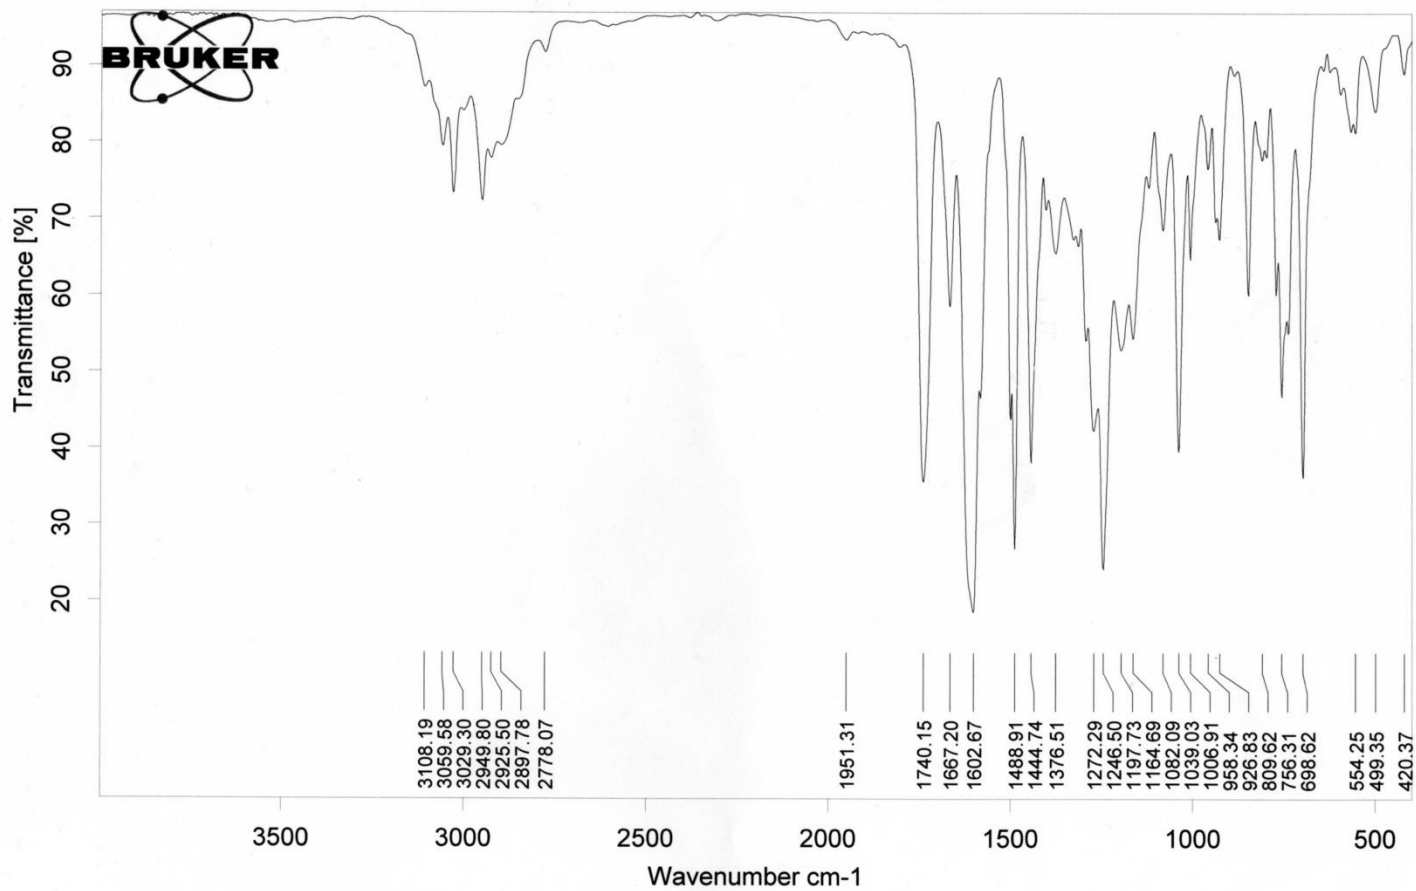

D:\temp-files\FTIR files\201502\20150210\MIR\_TR\_DTGS\_chang603201.0.dpt

PROTON\_01  
chang501202

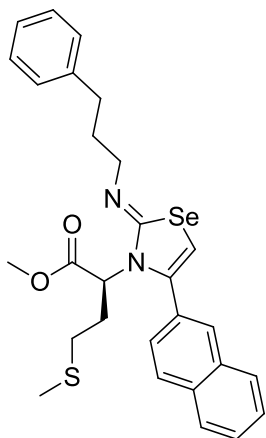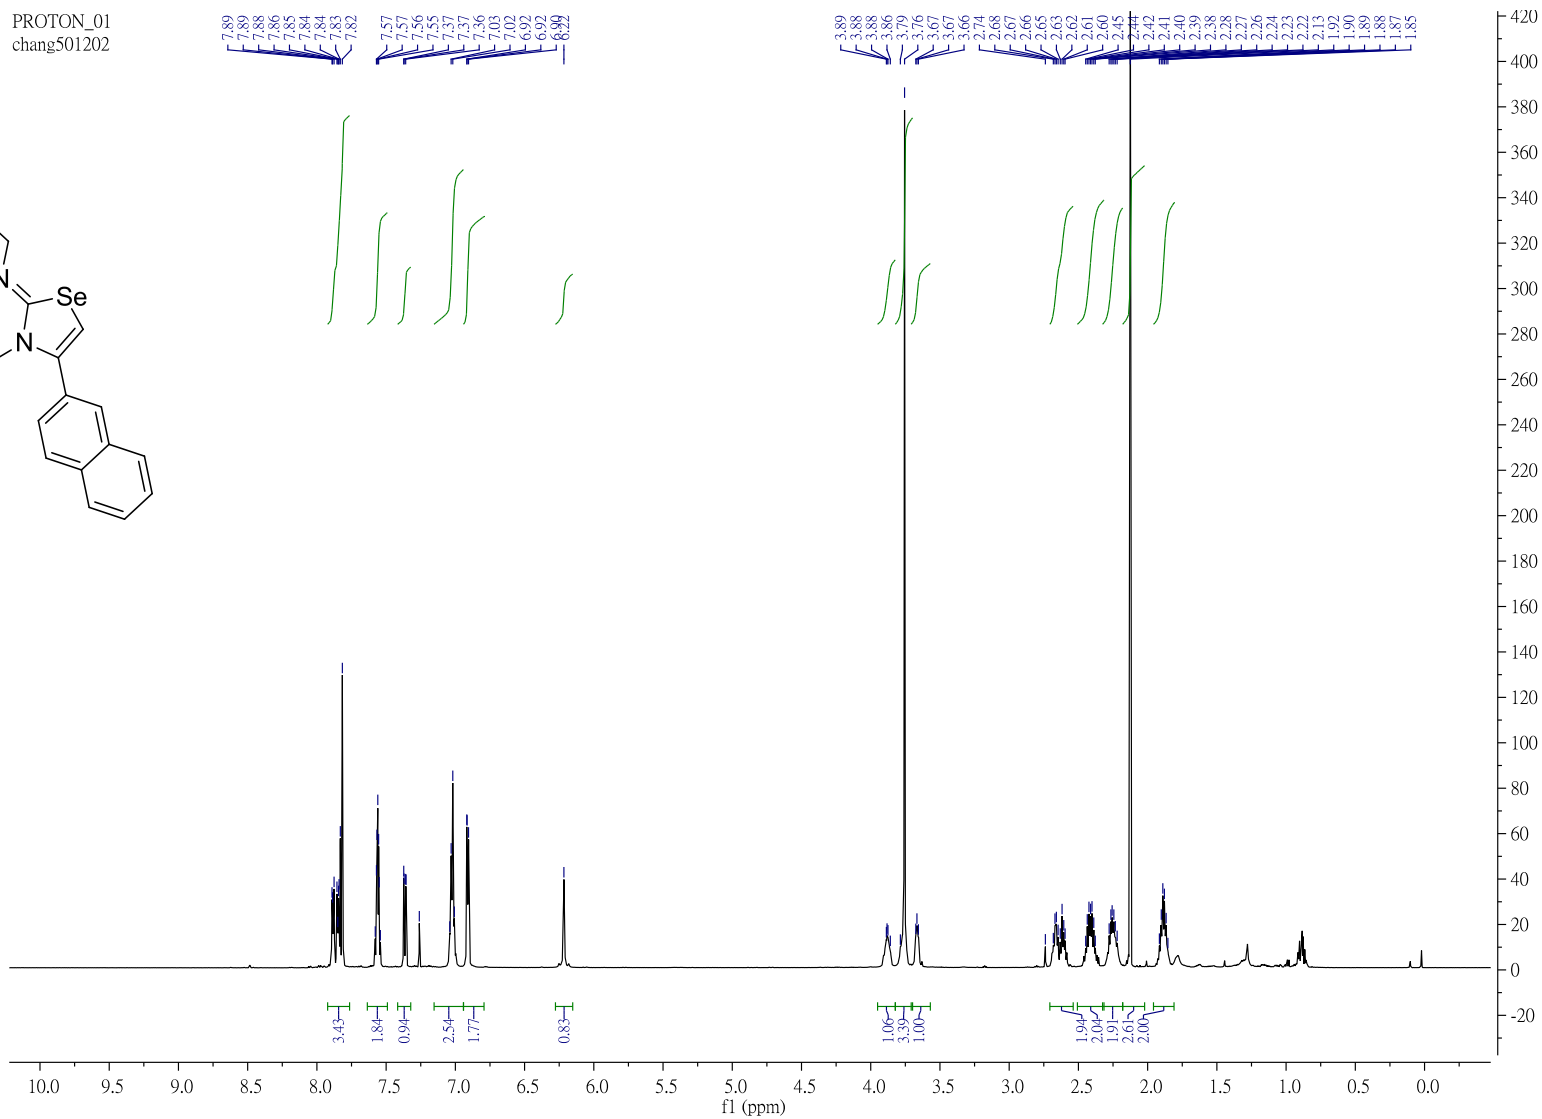

5c  $^1\text{H}$ NMR

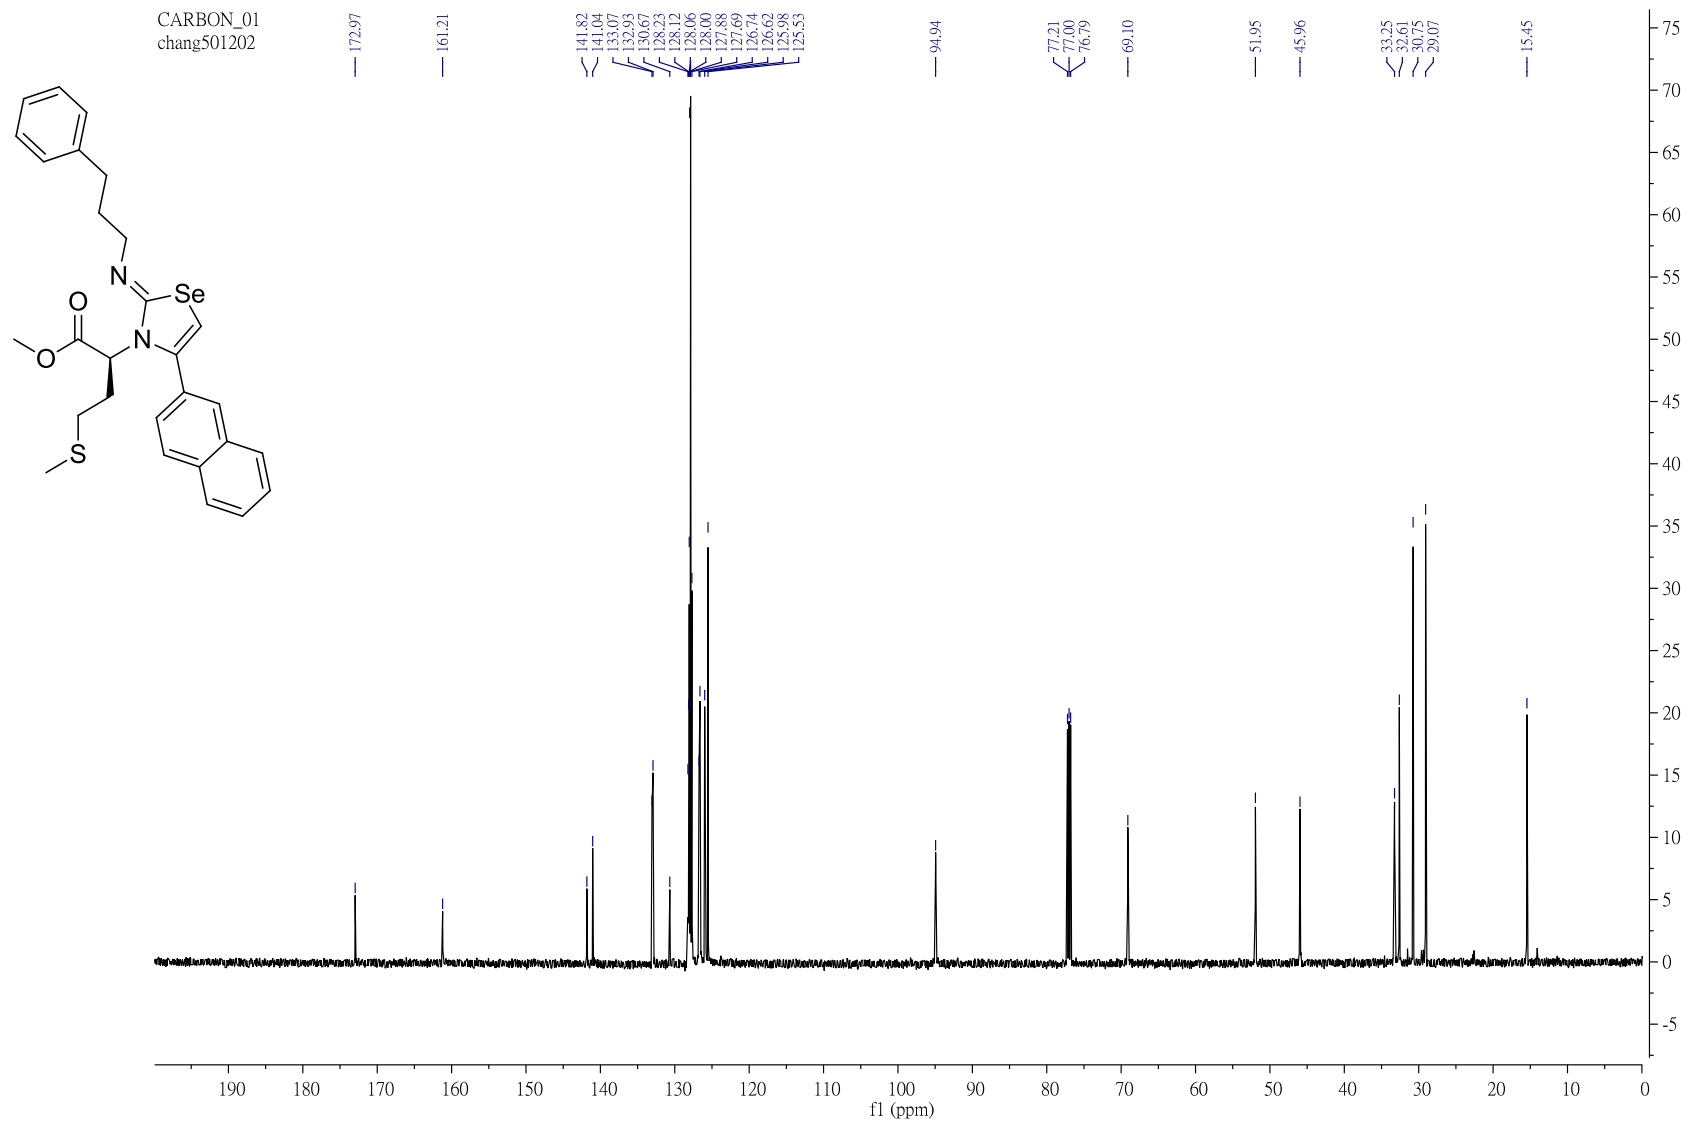

5c C<sup>13</sup>NMR

chang501201

Sample Name:  
chang501201  
Data Collected on:  
localhost.localdomain-vnmrs600  
Archive directory:  
/home/suncm/vnmrsys/data  
Sample directory:  
chang501201\_20111110\_01  
Fidfile: DEPT\_01

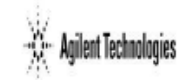

Pulse Sequence: DEPT  
Solvent: cdcl3  
Data collected on: Nov 10 2011

Temp. 25.0 C / 298.1 K  
Operator: chang

Relax. delay 1.000 sec  
Pulse 90.0 degrees  
Acq. time 0.865 sec  
Width 37878.8 Hz  
32 repetitions  
OBSERVE C13, 150.8029926 MHz  
DECOUPLE H1, 599.7359663 MHz  
Power 43 dB  
on during acquisition  
off during delay  
WALTZ-16 modulated  
DATA PROCESSING  
Line broadening 1.0 Hz  
FT size 65536  
Total time 12 min

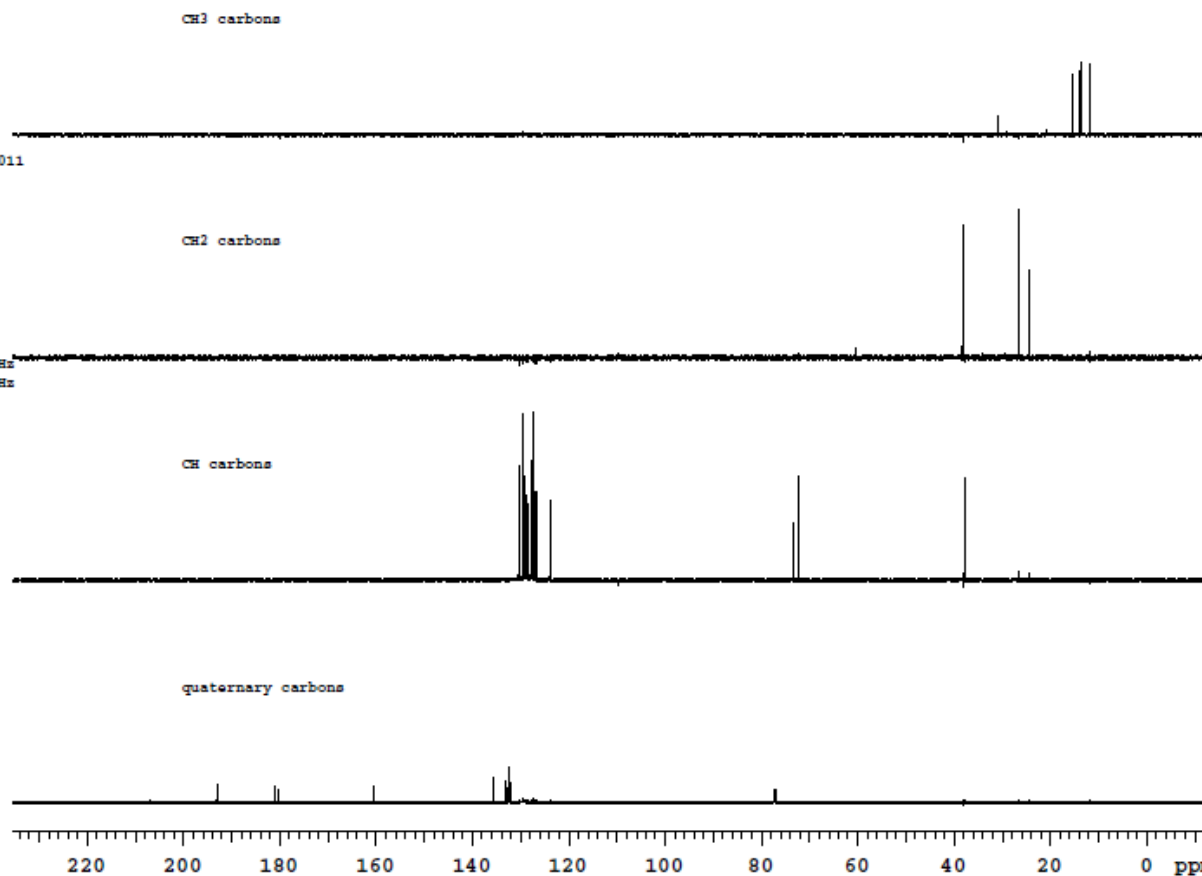

Plotname: DEPT\_01\_plot01

### 5c DEPT



chang501201

20111114-3 24 (1.644) Cn (Top,4, Ht); Sm (Min, 2x0.75); Sb (3,40.00); Cm (22:25-1:18x2.000)

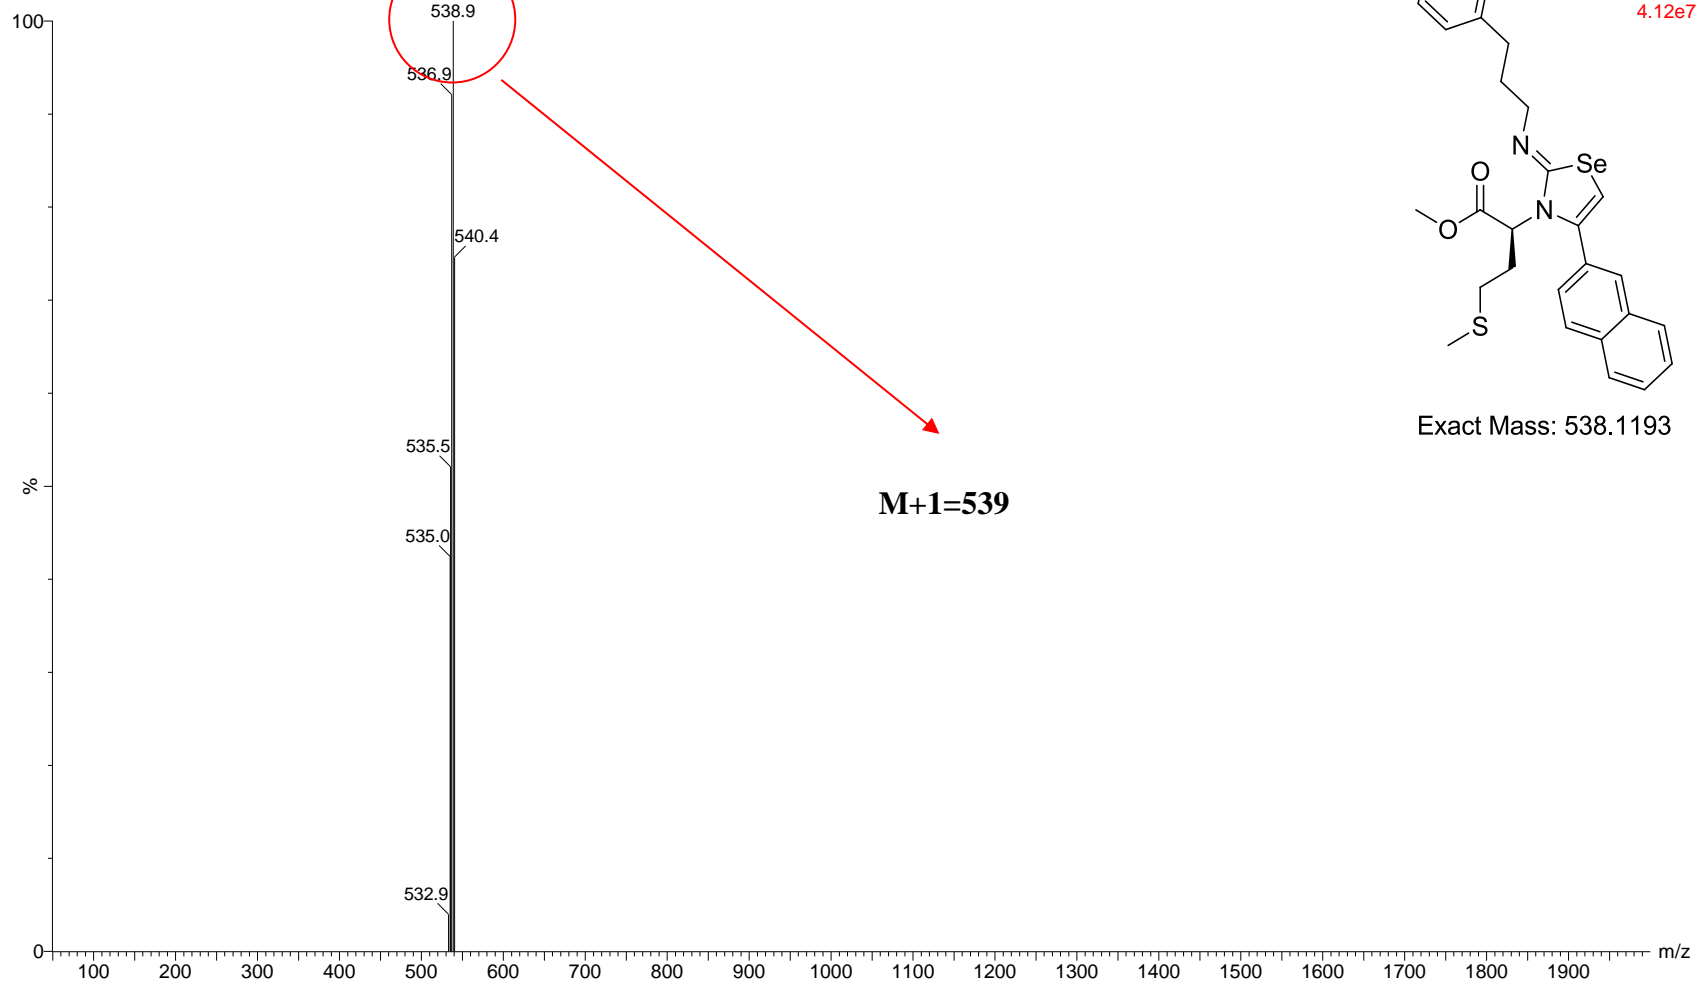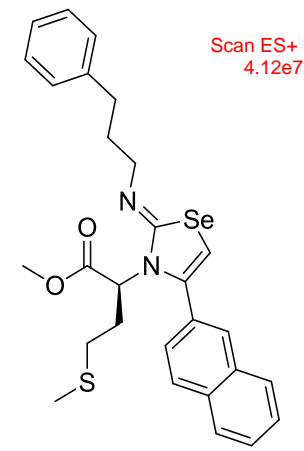

Exact Mass: 538.1193

5c LR-MS

S65

Varian MS

File: C:\Program Files\Omega\DataFiles\2012-01\SMS0053002012010103-15006-+-10-1.trans  
Base-Peak Amplitude: 262.3999 Total Intensity: 511.497 Scans: 10 Positive Ions External Calibration

Remove Noises 12-JAN-2012 11:06:44

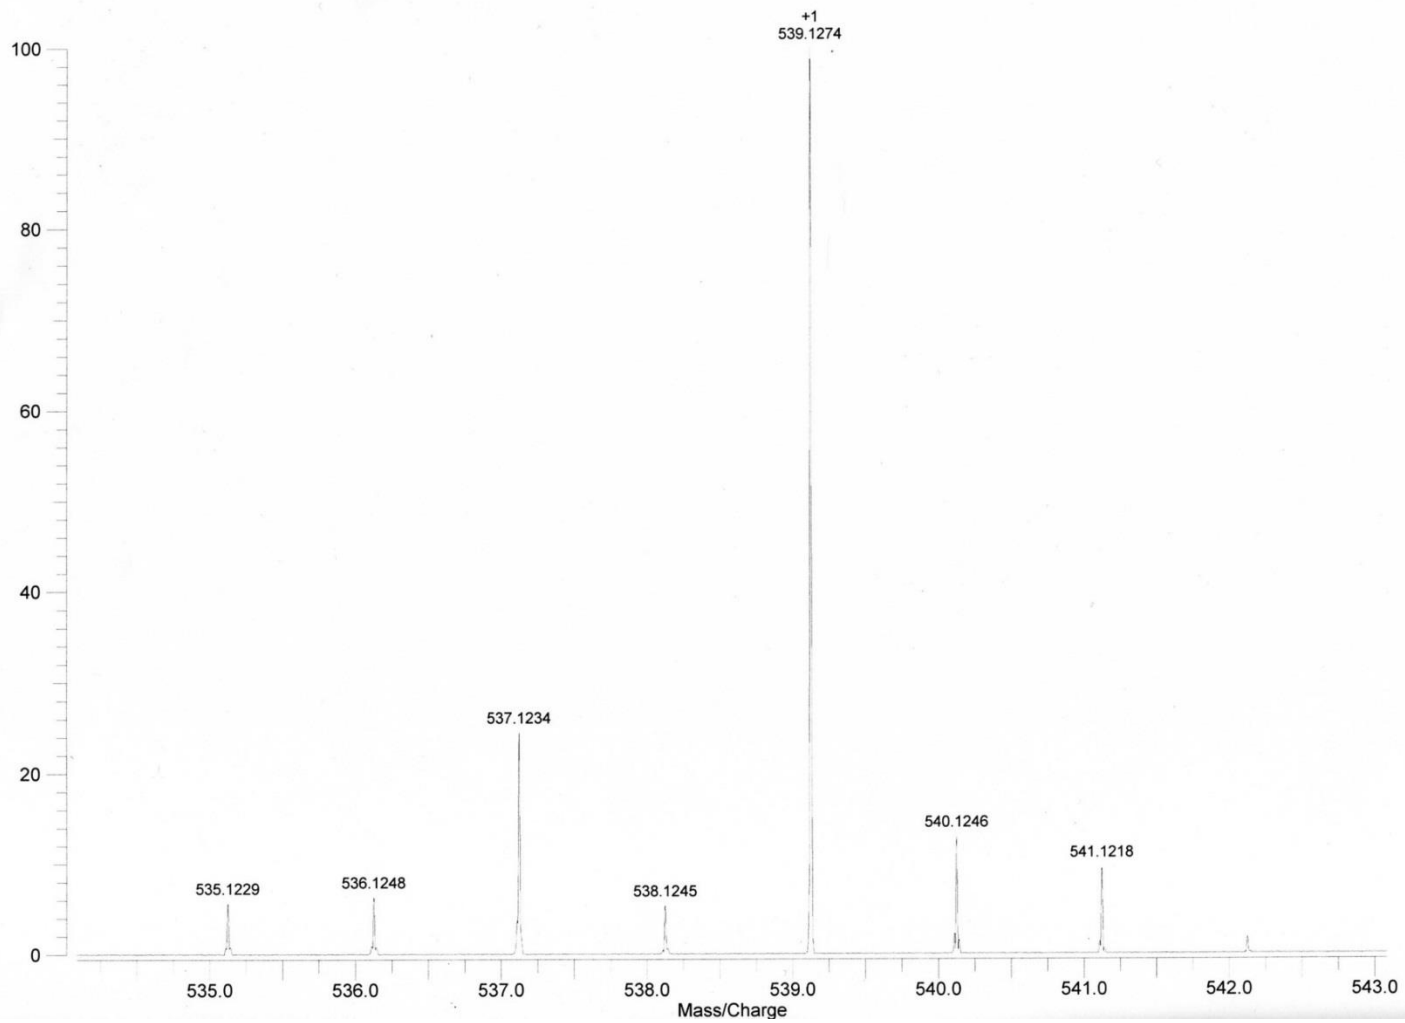

5c HR-MS

S66

Mass/Intensity Table - Varian ESI FTMS with Omega v9.1.20

File: C:\Program Files\Omega\DataFiles\2012-01\SMS0053002012010103-15006--10-1.trans  
Acquired: 12-JAN-2012 11:06:44  
Accumulated Transients: 10

Mode: Positive Ions  
Threshold: 0.35%

External CAL  
Total Peak Area: 4941.1468  
Total Intensity: 511.4965

| <u>m/z</u> | Rel.<br>Abund. | Resolution |
|------------|----------------|------------|
| 179.04792  | 0.32           | 123900     |
| 179.71486  | 0.94           | 136200     |
| 268.56894  | 0.56           | 110100     |
| 269.56957  | 2.23           | 70300      |
| 345.10088  | 0.46           | 65400      |
| 345.11237  | 0.45           | 58100      |
| 360.31923  | 0.53           | 67600      |
| 437.18884  | 5.22           | 54100      |
| 438.19046  | 0.97           | 54700      |
| 438.33090  | 0.54           | 55800      |
| 453.16158  | 2.01           | 55500      |
| 535.12288  | 5.70           | 47100      |
| 535.13841  | 0.85           | 32600      |
| 536.11055  | 0.92           | 35700      |
| 536.12477  | 6.36           | 47700      |
| 536.14038  | 0.84           | 33800      |
| 537.11022  | 3.81           | 33900      |
| 537.12345  | 24.53          | 46000      |
| 538.10963  | 0.50           | 50600      |
| 538.12446  | 5.40           | 46600      |
| 538.14073  | 0.64           | 31000      |
| 539.12739  | 100.00         | 44400      |
| 540.10960  | 2.13           | 45900      |
| 540.12464  | 13.01          | 49200      |
| 540.14008  | 1.56           | 46100      |
| 541.10743  | 1.37           | 44700      |
| 541.12185  | 9.63           | 48700      |
| 541.13785  | 0.64           | 42300      |
| 542.12297  | 1.77           | 45300      |
| 659.05260  | 0.62           | 27200      |
| 697.64444  | 0.44           | 31600      |

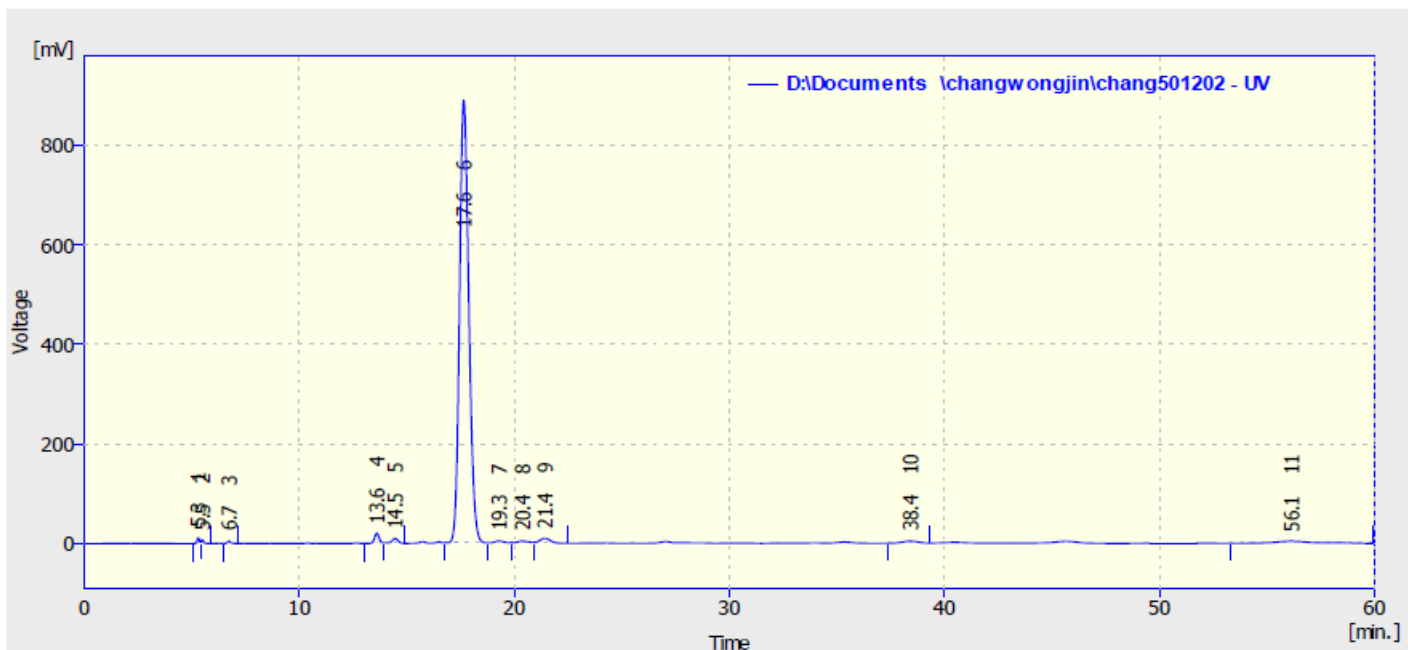

Result Table (Uncal - D:\Documents \changwongjin\chang501202 - UV)

|    | Reten. Time [min.] | Area [mV.s] | Height [mV] | Area [%] | Height [%] |
|----|--------------------|-------------|-------------|----------|------------|
| 1  | 5.304              | 83.097      | 11.850      | 0.3      | 1.2        |
| 2  | 5.484              | 60.351      | 7.343       | 0.2      | 0.8        |
| 3  | 6.724              | 49.096      | 4.875       | 0.2      | 0.5        |
| 4  | 13.612             | 314.587     | 20.748      | 1.1      | 2.1        |
| 5  | 14.464             | 209.177     | 9.709       | 0.7      | 1.0        |
| 6  | 17.648             | 26669.174   | 889.464     | 92.7     | 91.6       |
| 7  | 19.288             | 136.842     | 4.170       | 0.5      | 0.4        |
| 8  | 20.372             | 151.700     | 4.244       | 0.5      | 0.4        |
| 9  | 21.428             | 338.807     | 9.698       | 1.2      | 1.0        |
| 10 | 38.424             | 199.907     | 4.108       | 0.7      | 0.4        |
| 11 | 56.140             | 554.114     | 4.324       | 1.9      | 0.4        |
|    | Total              | 28766.853   | 970.534     | 100.0    | 100.0      |

### 5c chiral HPLC

SAMPLE : 5c  
 ID # : 002  
 LAMP λ : 589 nm  
 CONC : 0.03000 g/ml  
 CELL LG: 010 mm  
 TEMP CORR: +0.00037  
 INTERVAL: 1 min

SPECIFIC ROTATION [α]  
 COUNT [α](°) TEMP(°C)  
 01 - 80.5002 19.2  
 02 - 81.8336 19.2  
 03 - 82.6669 19.2  
 04 - 82.5002 19.2  
 05 - 83.3336 19.2  
 06 - 84.0003 19.2  
 07 - 84.1669 19.2  
 08 - 84.5003 19.2  
 09 - 84.8336 19.2  
 10 - 85.5003 19.2

MEAN = - 83.3836°  
 σ(N-1) = 1.5215°  
 C.V. = 1.8247%

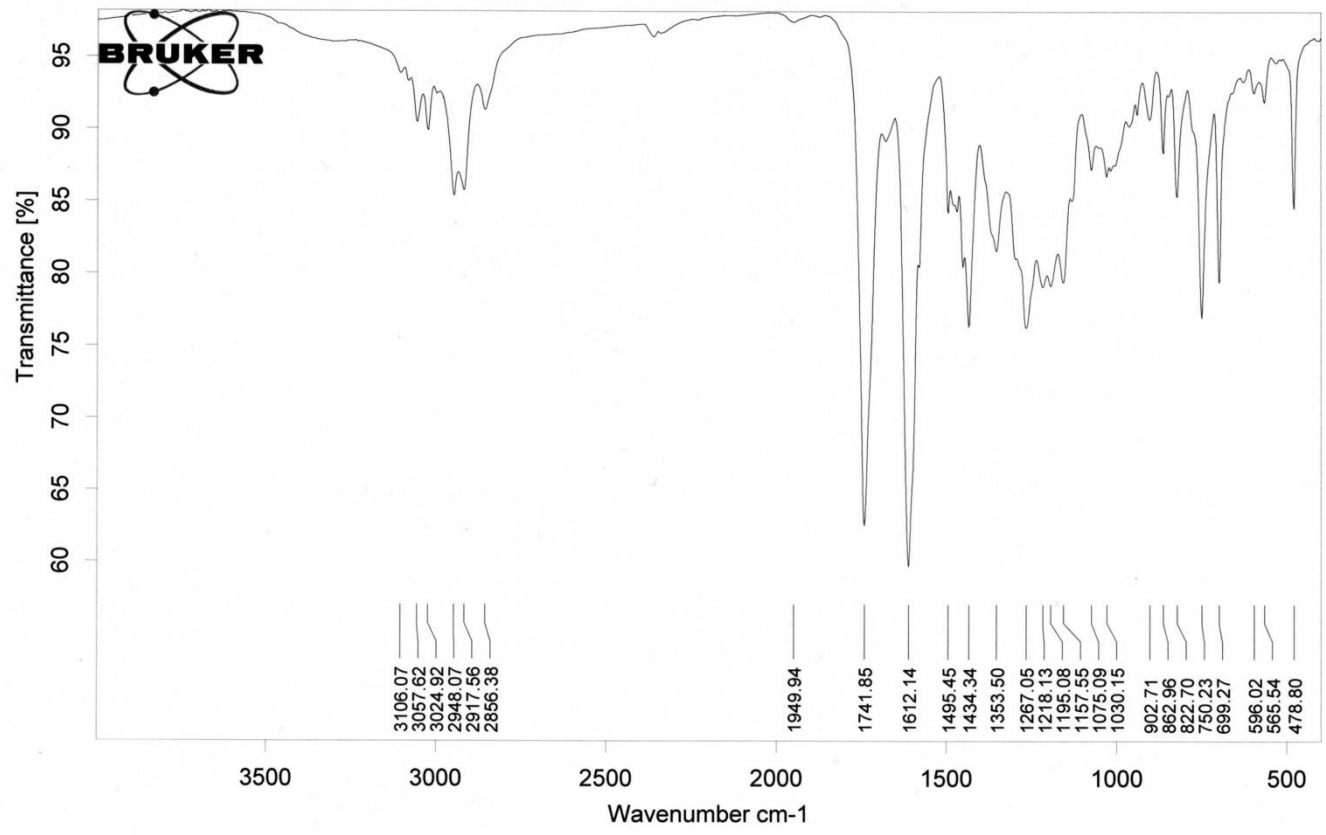

D:\temp-files\FTIR files\201501\20150121\MIR\_TR\_DTGS\_blank KBr\_chang501202.0.dpt

5c FT-IR

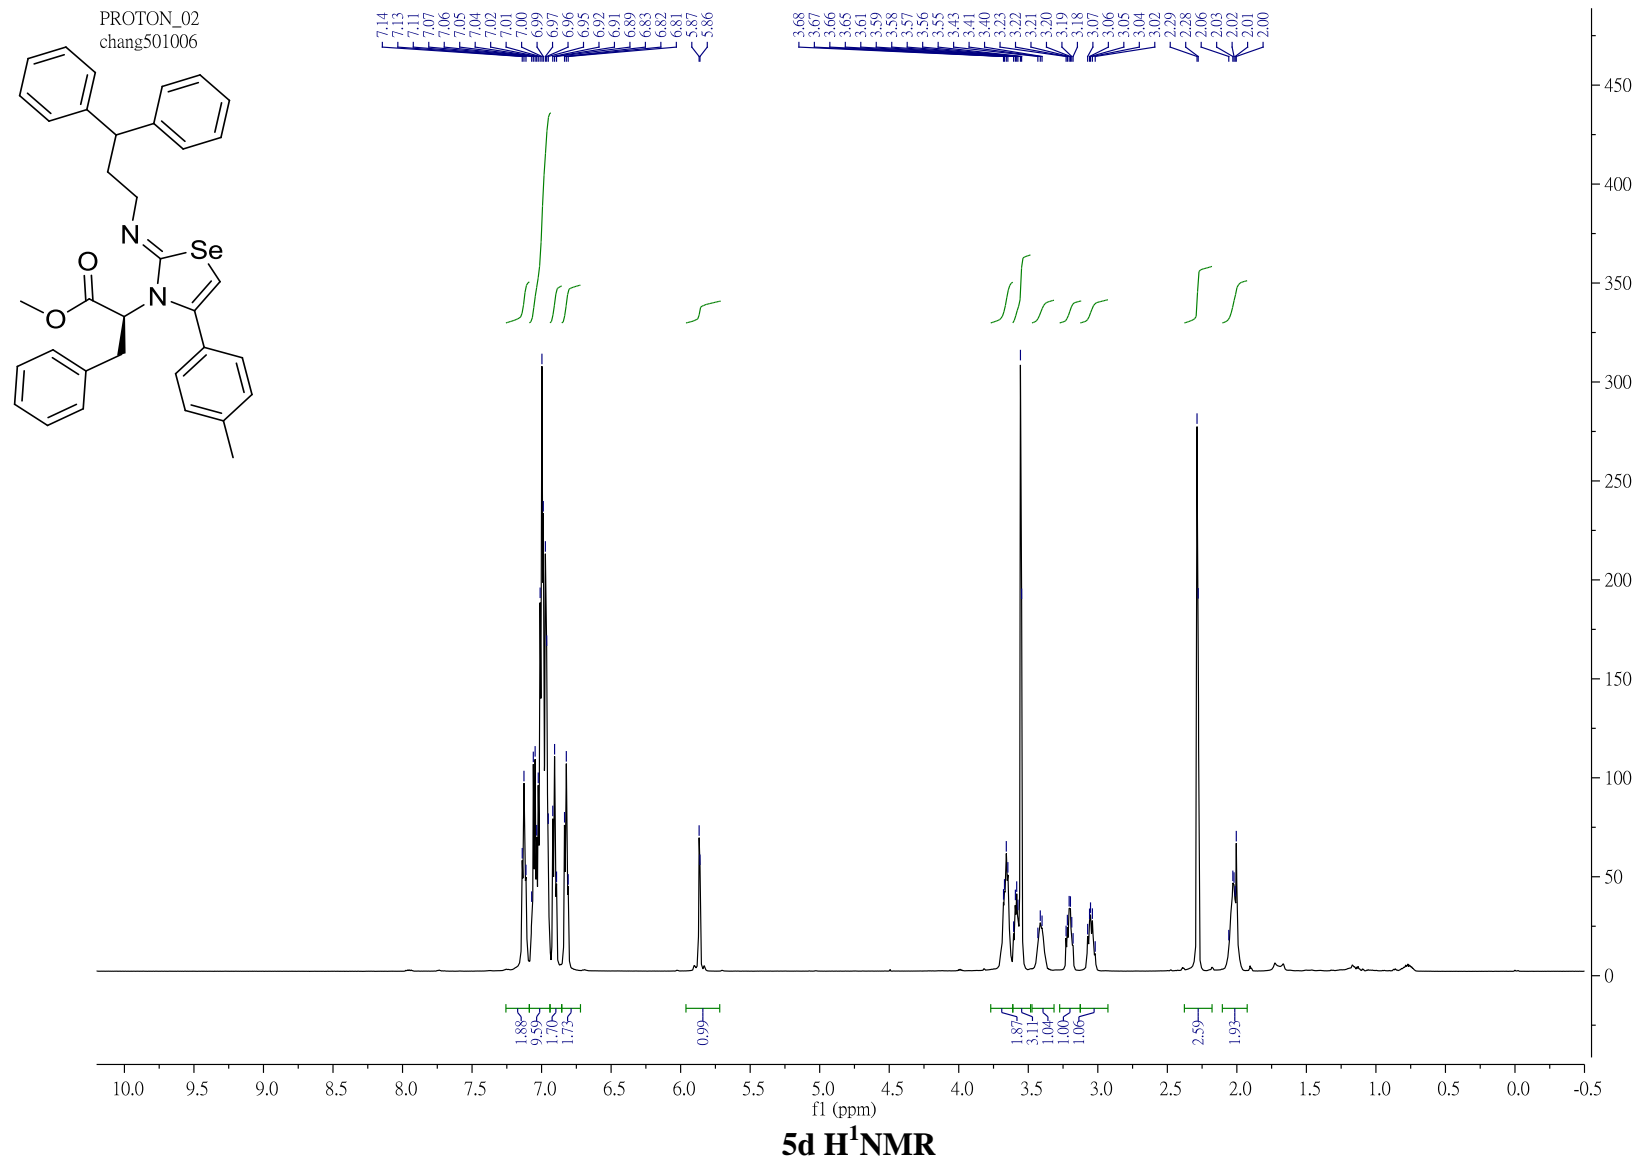

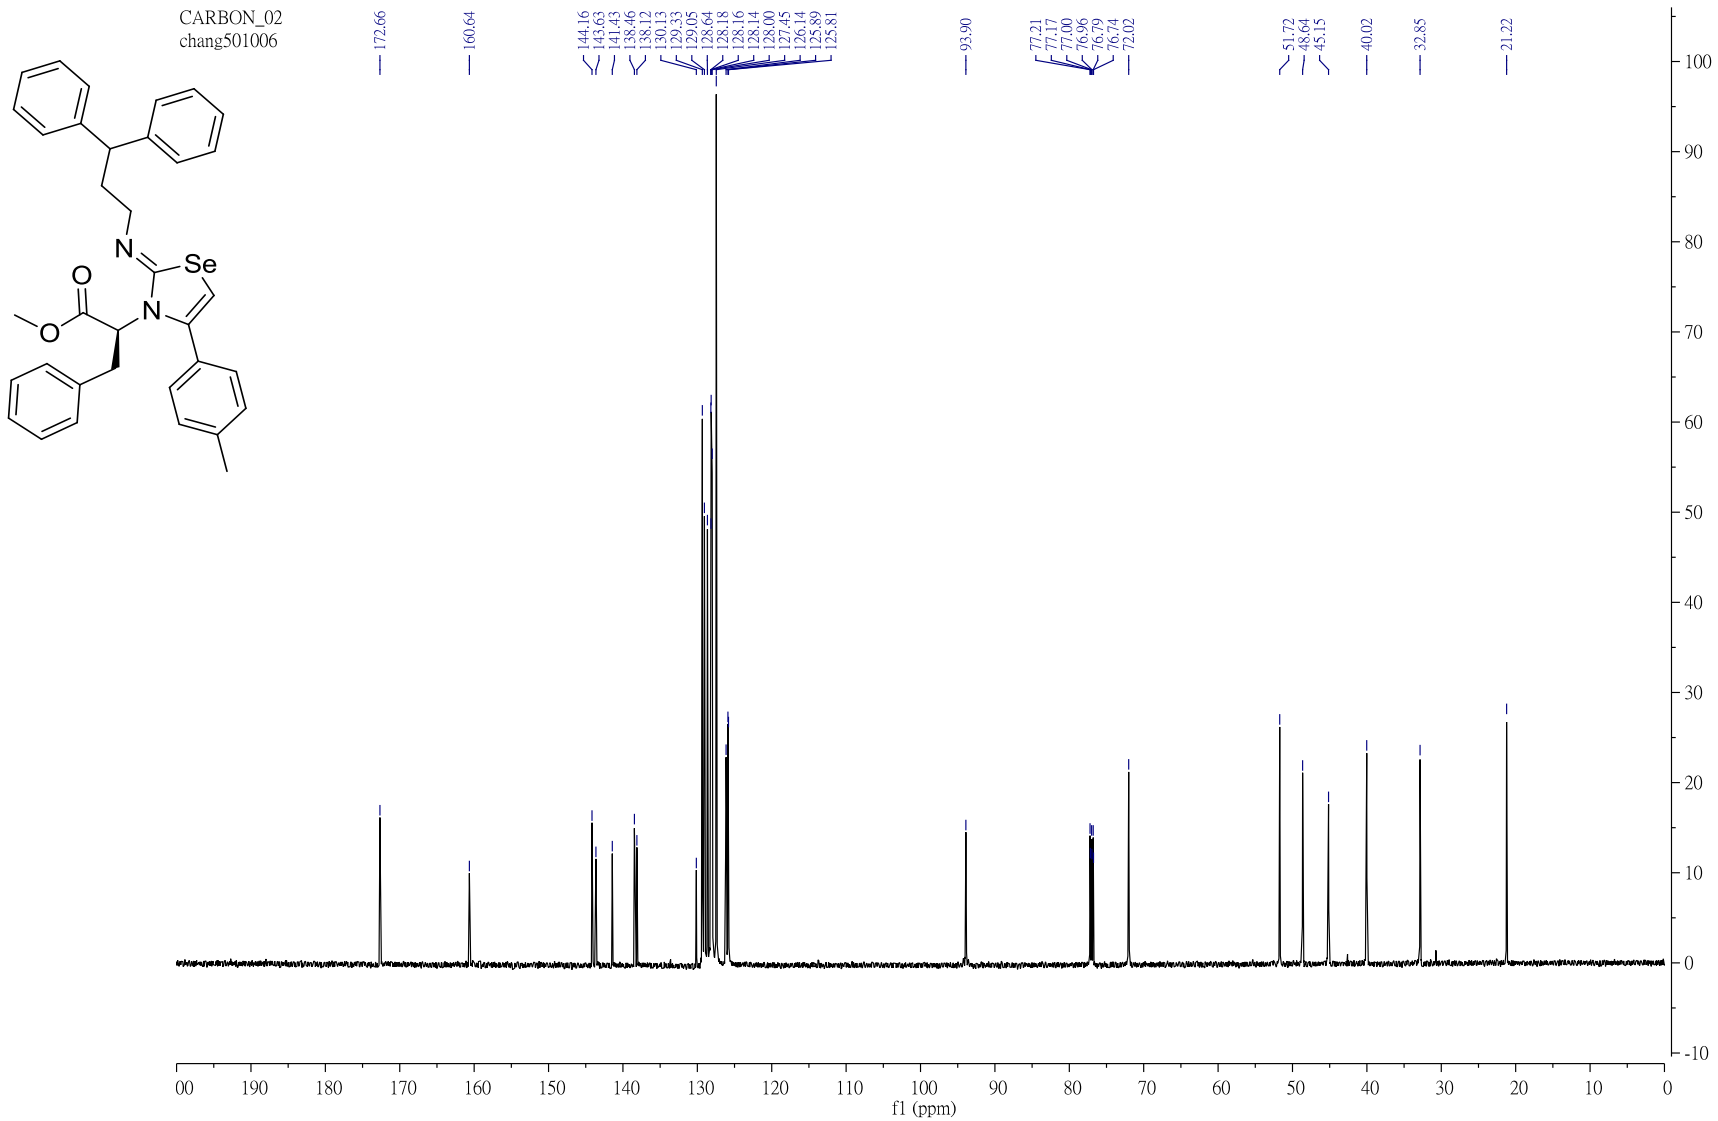

5d  $C^{13}$ NMR

chang501001

20111114-1 58 (3.973) Cn (Top,4, Ht); Sm (Mn, 2x0.75); S6 (3,40.00); Cm (57:60-1:41x2.00)

Scan ES+  
4.26e7

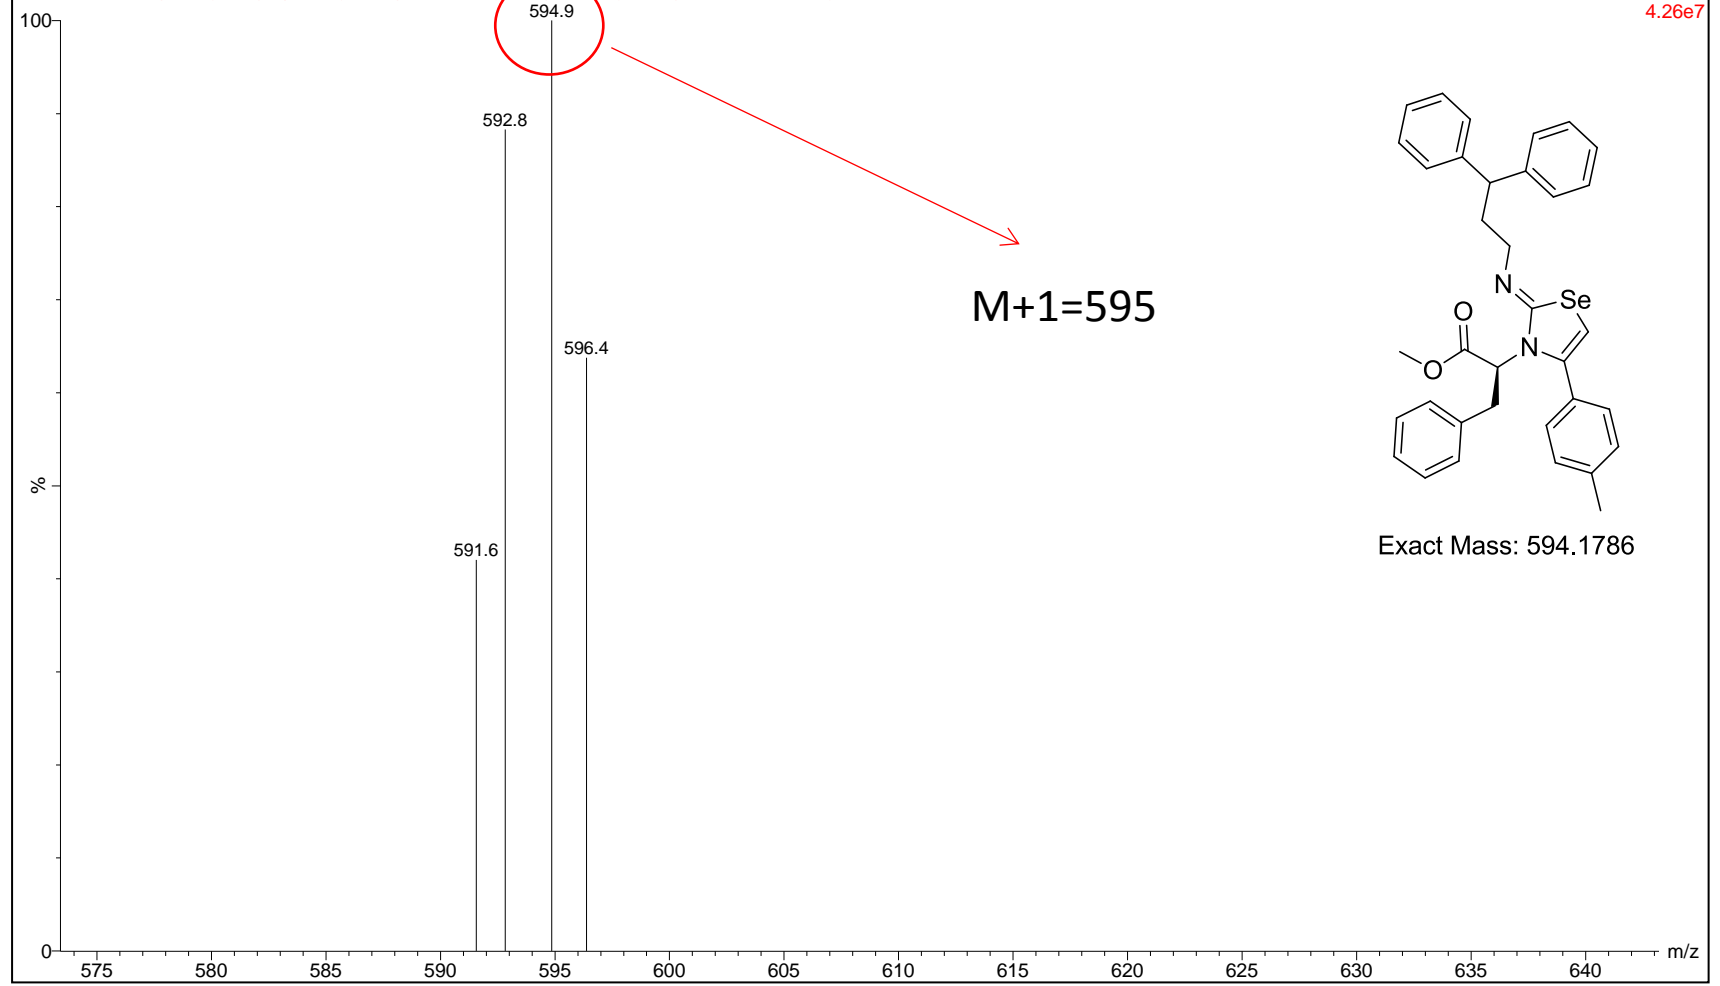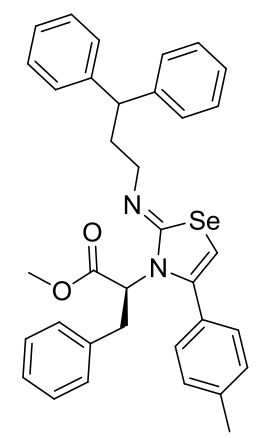

Exact Mass: 594.1786

5d LR-MS



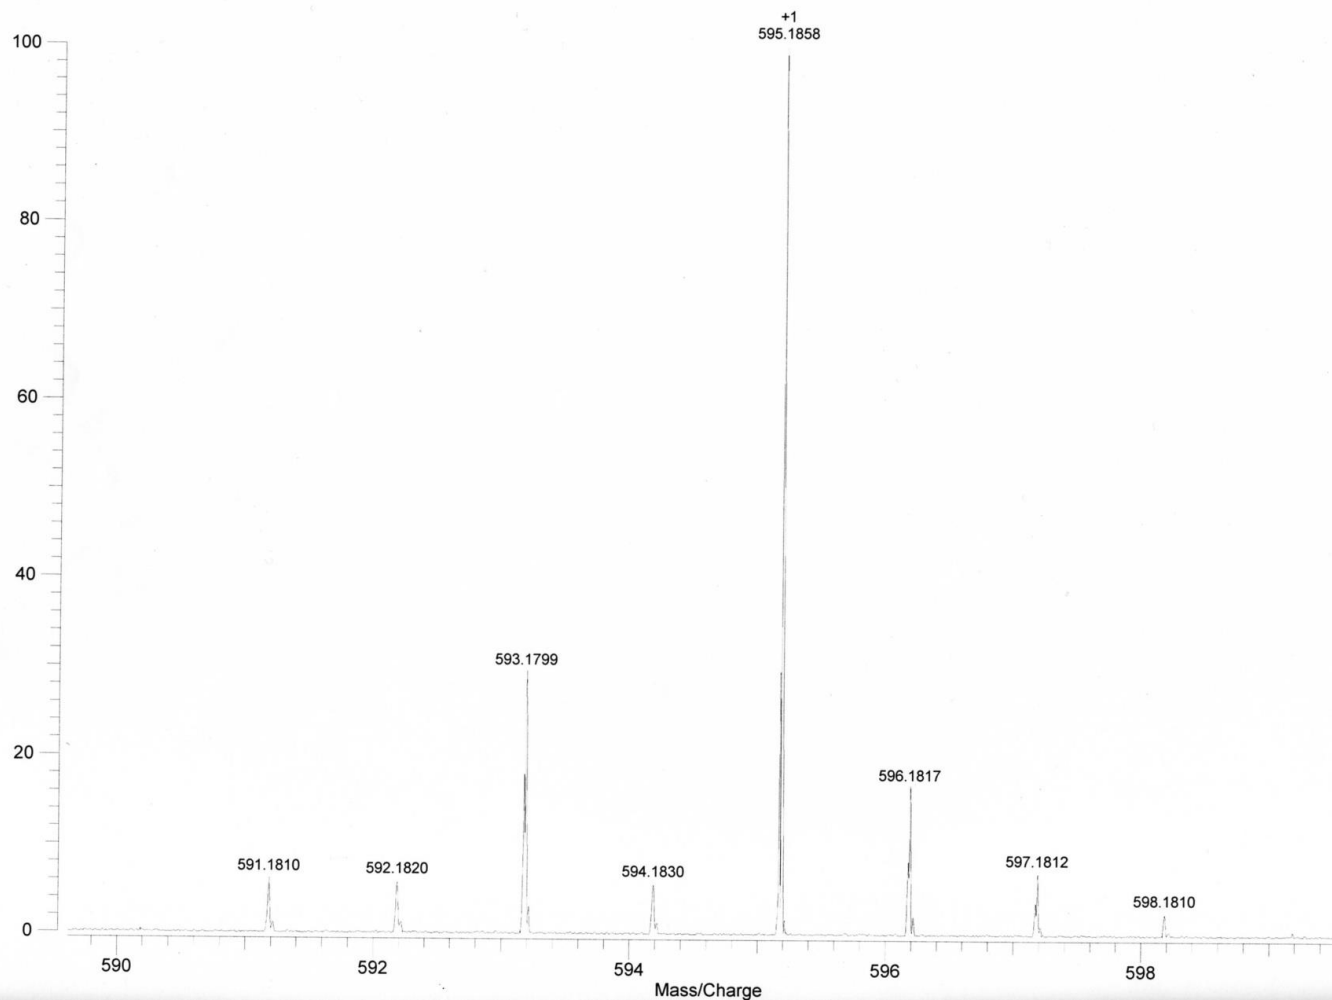

5d HR-MS

File: C:\Program Files\Omega\DataFiles\2012-01\SMS0053002012010103-15005+-10-4.trans  
Acquired: 12-JAN-2012 10:18:02  
Accumulated Transients: 10

Mode: Positive Ions  
Threshold: 0.50%

External CAL  
Total Peak Area: 1992.7401  
Total Intensity: 222.8925

| <u>m/z</u> | Rel.<br>Abund. | Resolution | <u>m/z</u> | Rel.<br>Abund. | Resolution |
|------------|----------------|------------|------------|----------------|------------|
| 246.25534  | 0.67           | 96300      | 597.18118  | 6.90           | 45200      |
| 296.59192  | 1.33           | 58500      | 597.20994  | 1.02           | 41500      |
| 296.60124  | 0.79           | 82800      | 598.18104  | 2.48           | 31300      |
| 297.59272  | 1.68           | 51400      | 658.56719  | 0.78           | 37200      |
| 297.59907  | 1.28           | 90300      | 659.05107  | 0.76           | 21000      |
| 298.09329  | 0.93           | 69200      | 659.53327  | 0.67           | 29400      |
| 344.97208  | 0.71           | 70400      |            |                |            |
| 344.97948  | 1.78           | 67800      |            |                |            |
| 344.98564  | 1.44           | 47400      |            |                |            |
| 344.98998  | 0.75           | 45400      |            |                |            |
| 345.02916  | 0.65           | 63200      |            |                |            |
| 360.32091  | 0.67           | 71800      |            |                |            |
| 395.26225  | 0.61           | 66300      |            |                |            |
| 395.43721  | 0.97           | 62700      |            |                |            |
| 413.26255  | 0.70           | 59100      |            |                |            |
| 437.18959  | 2.34           | 51000      |            |                |            |
| 438.33323  | 1.09           | 55200      |            |                |            |
| 453.16278  | 1.28           | 50400      |            |                |            |
| 589.18296  | 0.66           | 35600      |            |                |            |
| 591.18103  | 5.99           | 27700      |            |                |            |
| 591.21167  | 1.22           | 28300      |            |                |            |
| 592.18197  | 5.73           | 26200      |            |                |            |
| 592.21088  | 1.26           | 25000      |            |                |            |
| 593.17360  | 16.70          | 30800      |            |                |            |
| 593.17993  | 29.93          | 48600      |            |                |            |
| 593.20823  | 3.12           | 45200      |            |                |            |
| 594.18304  | 5.55           | 27100      |            |                |            |
| 594.21094  | 1.30           | 30400      |            |                |            |
| 595.16917  | 32.64          | 63100      |            |                |            |
| 595.18582  | 100.00         | 46200      |            |                |            |
| 595.20955  | 1.72           | 64300      |            |                |            |
| 596.17418  | 8.12           | 30500      |            |                |            |
| 596.18167  | 16.52          | 43600      |            |                |            |
| 596.21425  | 2.15           | 44800      |            |                |            |
| 597.17211  | 3.37           | 29600      |            |                |            |

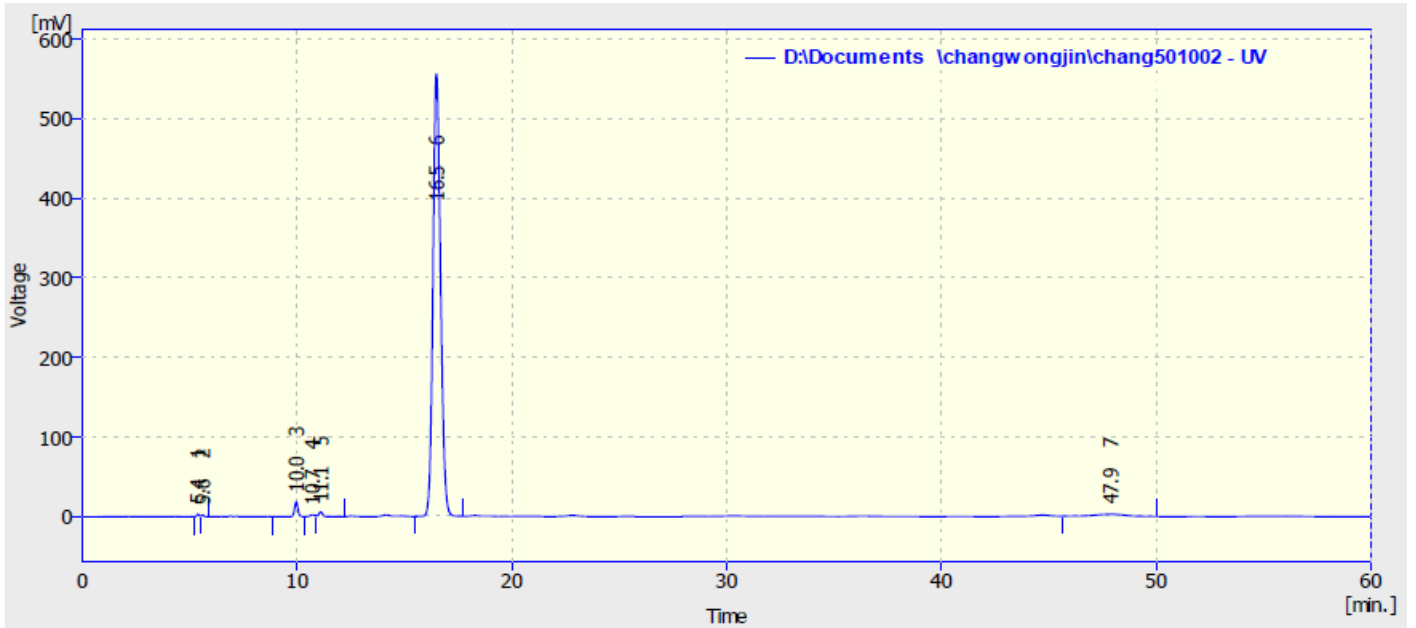

Result Table (Uncal - D:\Documents [changwongjin]chang501002 - UV)

|   | Reten. Time [min] | Area [mV.s] | Height [mV] | Area [%] | Height [%] |
|---|-------------------|-------------|-------------|----------|------------|
| 1 | 5.380             | 24.336      | 3.401       | 0.2      | 0.6        |
| 2 | 5.604             | 17.284      | 2.042       | 0.1      | 0.3        |
| 3 | 9.960             | 204.851     | 18.503      | 1.4      | 3.1        |
| 4 | 10.712            | 35.424      | 2.342       | 0.2      | 0.4        |
| 5 | 11.100            | 76.162      | 6.011       | 0.5      | 1.0        |
| 6 | 16.488            | 13651.457   | 556.116     | 95.7     | 94.1       |
| 7 | 47.880            | 251.772     | 2.691       | 1.8      | 0.5        |
|   | Total             | 14261.287   | 591.105     | 100.0    | 100.0      |

### 5d chiral HPLC

SAMPLE : -----  
 ID # : 003  
 LAMP  $\lambda$  : 589 nm  
 CONC : 0.05000 g/ml  
 CELL LG: 010 mm  
 TEMP CORR: +0.00037  
 INTERVAL: 1 min

SPECIFIC ROTATION  $[\alpha]$   
 COUNT  $[\alpha](^\circ)$  TEMP( $^\circ\text{C}$ )  
 01 - 53.4002 19.2  
 02 - 55.1002 19.2  
 03 - 55.9003 19.2  
 04 - 55.8003 19.2  
 05 - 55.8003 19.2  
 06 - 56.1002 19.2  
 07 - 56.2002 19.2  
 08 - 56.7002 19.2  
 09 - 57.0002 19.3  
 10 - 57.3002 19.3

MEAN = - 55.9302°  
 $\sigma(N-1)$  = 1.0975°  
 C. V. = - 1.9622%

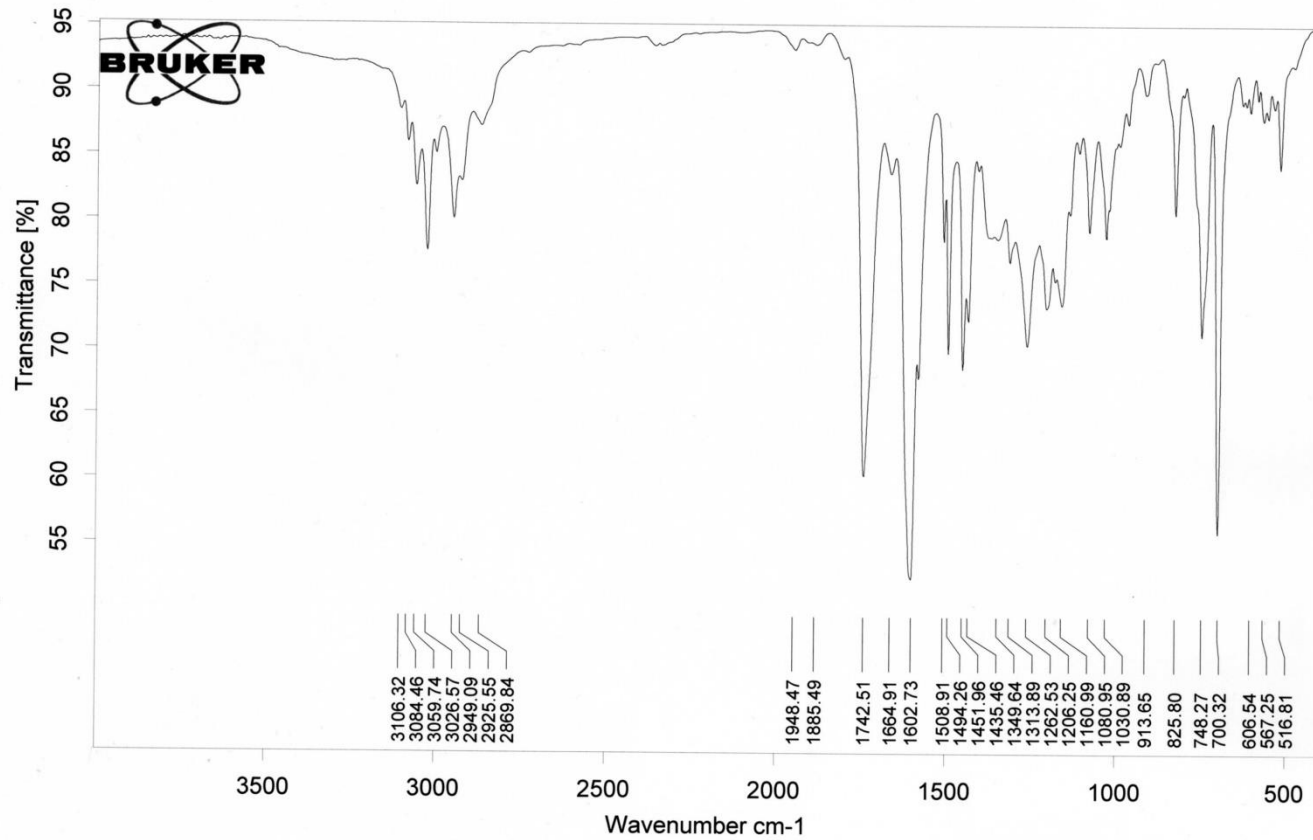

D:\temp-files\FTIR files\201501\20150121\MIR\_TR\_DTGS\_blank KBr\_chang609104.0.dpt

5d FT-IR

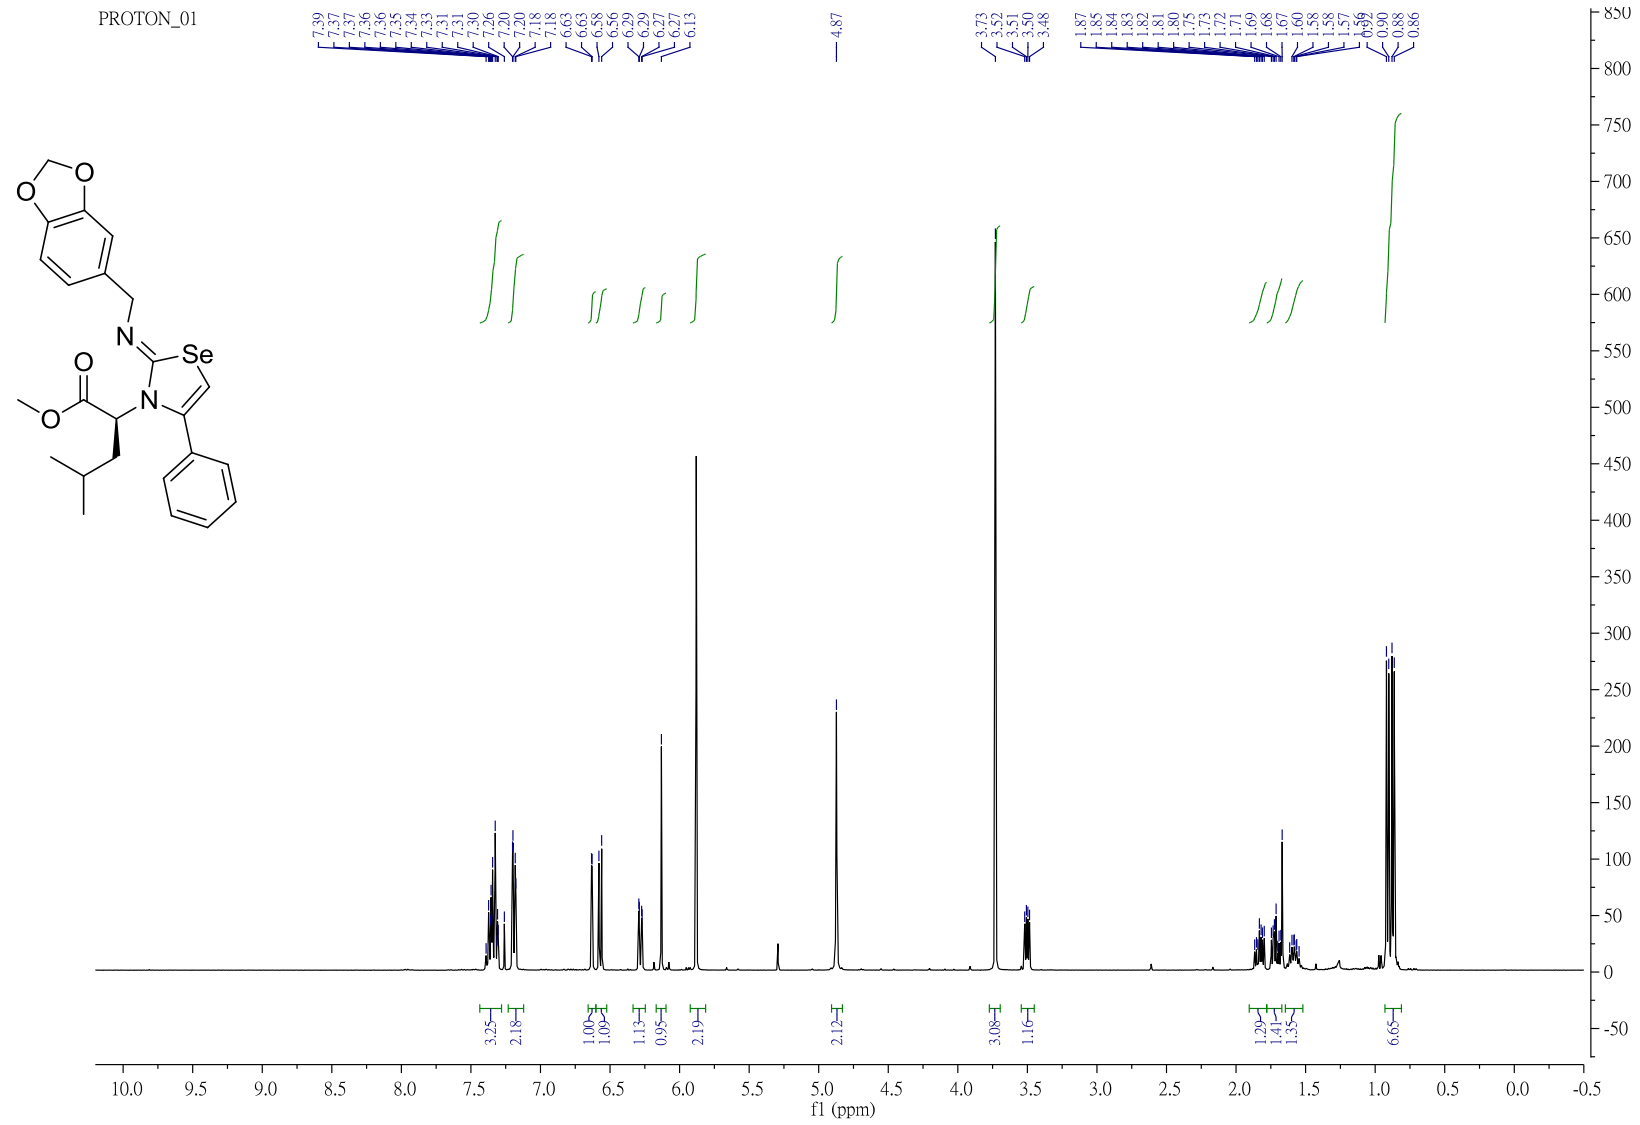

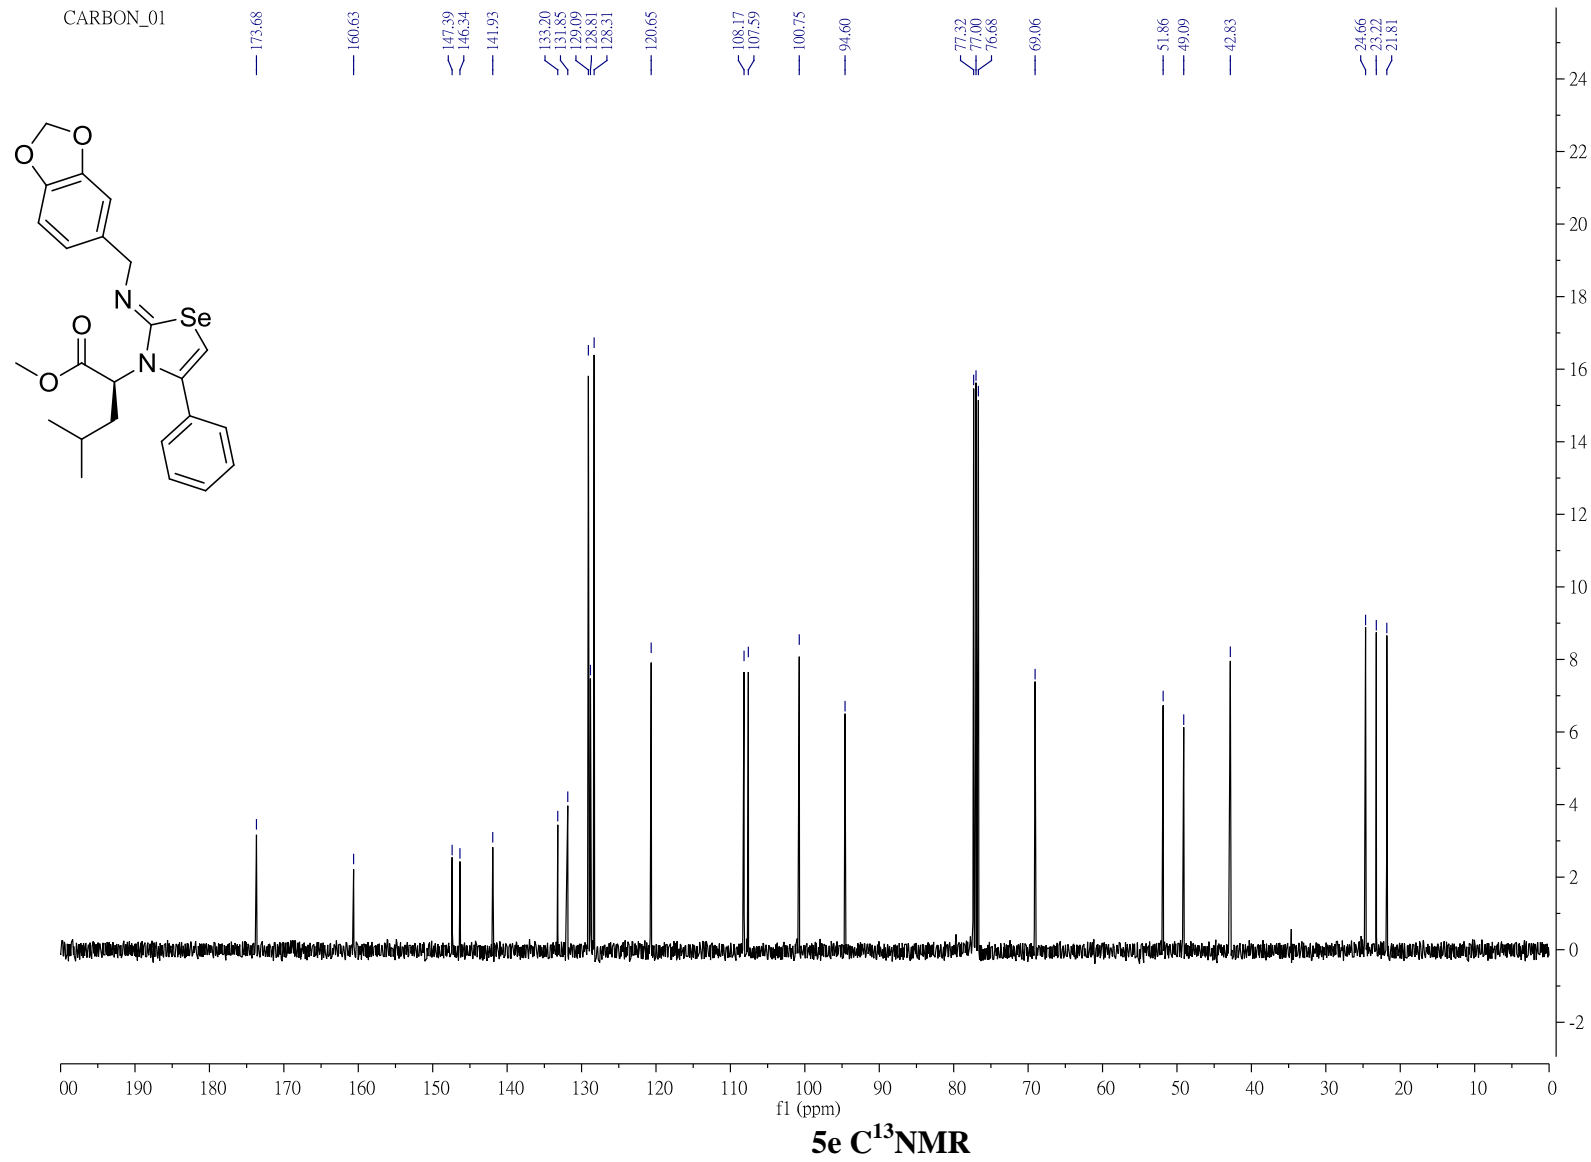

M+1=487.1

Scan 14 from c:\service\direct\20140425\2014-04-25\_chang703601.xms

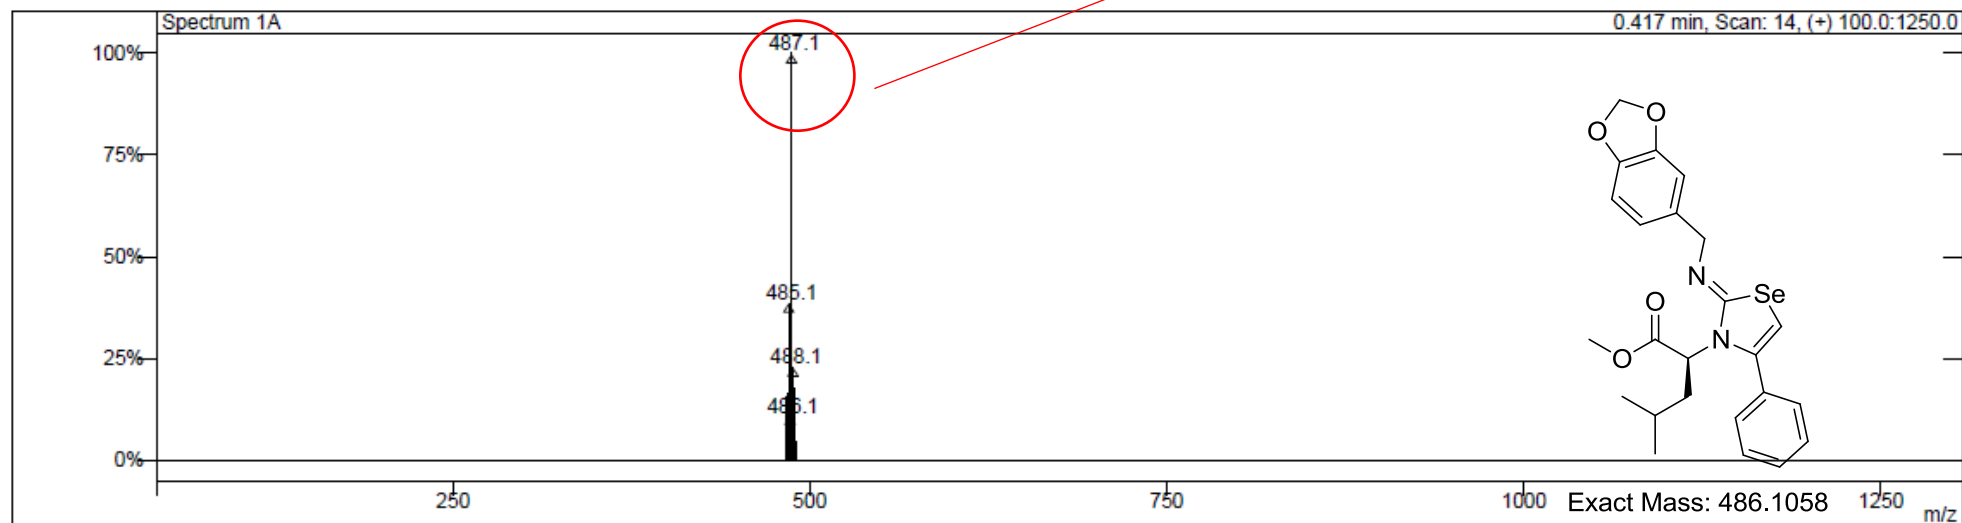

Spectrum from ...vice\direct\20140425\2014-04-25\_chang703601.xms  
Scan No: 14, Time: 0.417 minutes  
No averaging. Background corrected.  
Name: HESI-FS-POS  
Comment: 0.417 min. Scan: 14 (+) 100.0:1250.0 RIC: 2454431205  
Pair Count: 8 MW: 0 Formula: None  
CAS No: None Acquired Range: 100.0 - 1250.0 m/z

5e LR-MS

# Display Report

## Analysis Info

Analysis Name D:\Data\NCTU SERVICE\Data\20140626\702701 485 ESI+\_GD5\_01\_2022.d Acquisition Date 6/26/2014 9:52:30 AM  
Method Small molecule.m Operator NCTU  
Sample Name 702701 485 ESI+ Instrument impact HD 1819696.00164  
Comment

## Acquisition Parameter

|             |          |                      |          |                  |           |
|-------------|----------|----------------------|----------|------------------|-----------|
| Source Type | ESI      | Ion Polarity         | Positive | Set Nebulizer    | 1.0 Bar   |
| Focus       | Active   | Set Capillary        | 4500 V   | Set Dry Heater   | 200 °C    |
| Scan Begin  | 50 m/z   | Set End Plate Offset | -500 V   | Set Dry Gas      | 6.0 l/min |
| Scan End    | 1500 m/z | Set Charging Voltage | 2000 V   | Set Divert Valve | Waste     |
|             |          | Set Corona           | 0 nA     | Set APCI Heater  | 0 °C      |

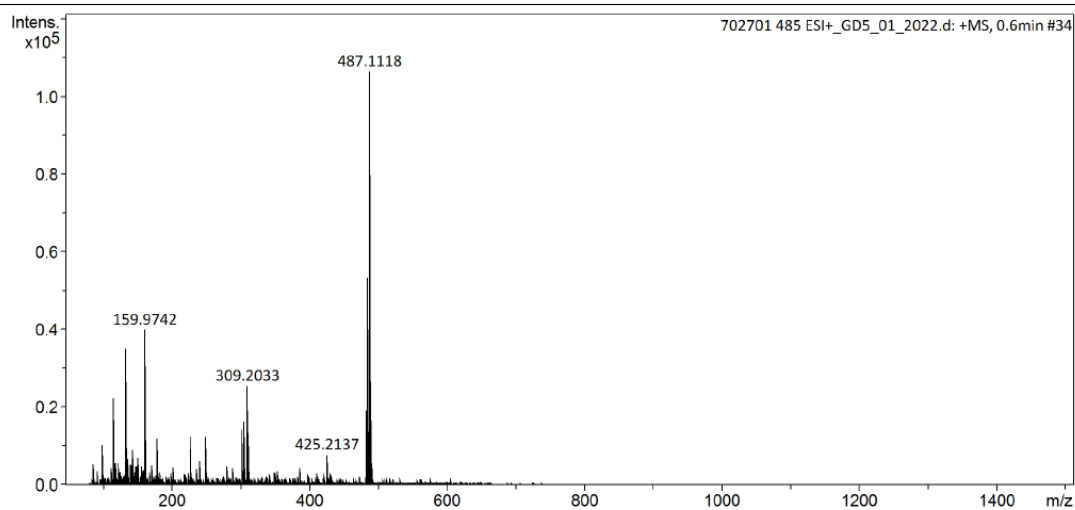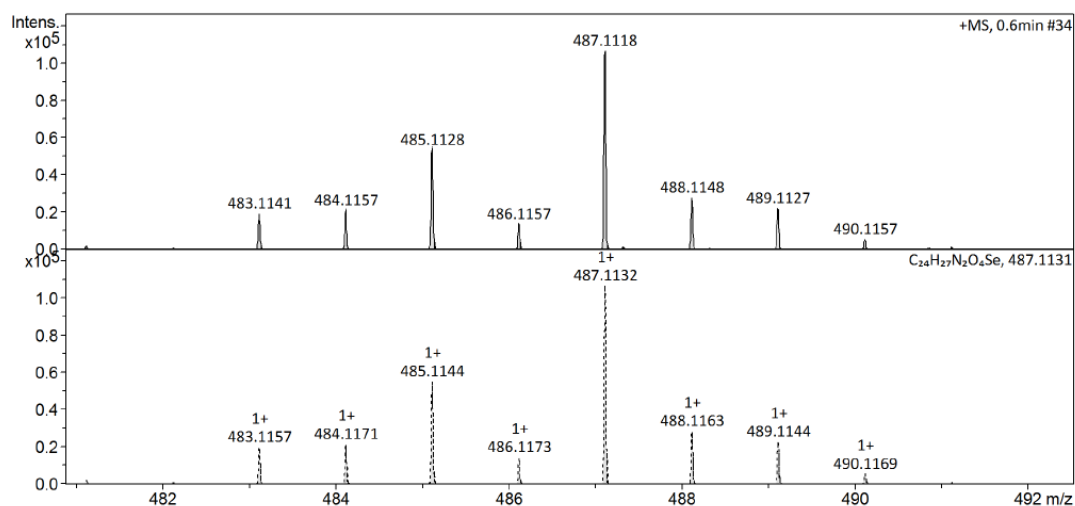

## 5e HR-MS



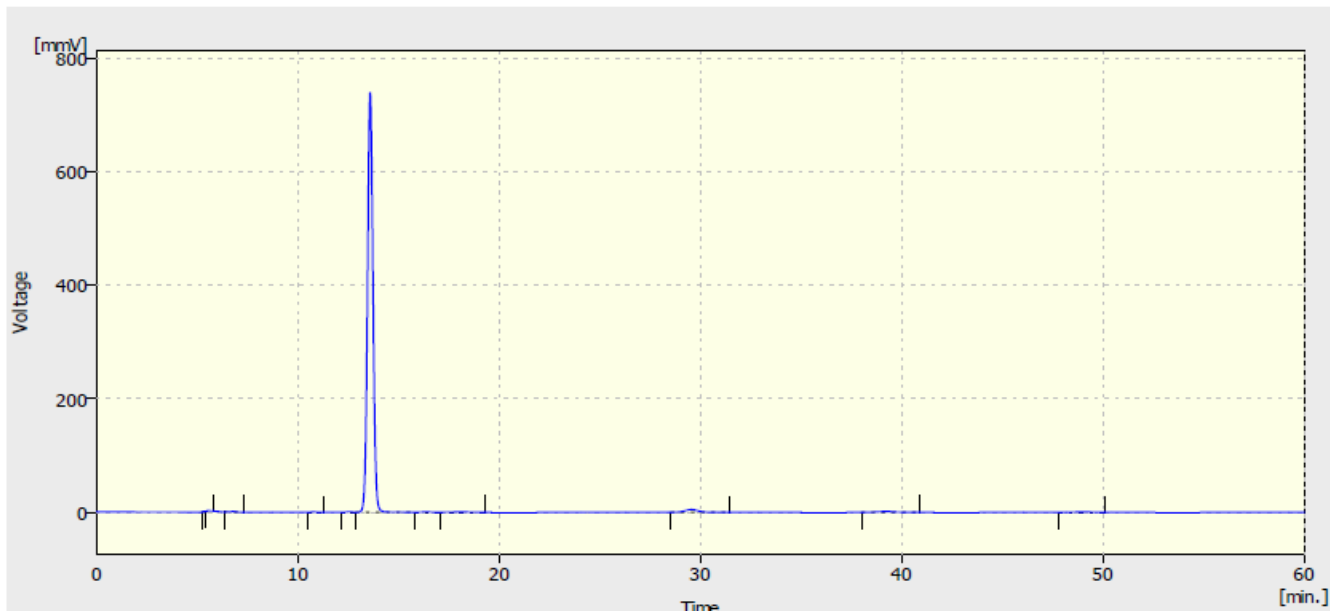

Result Table (Uncal - D:\Documents\changwongjin\chang703603)

|    | Reten. Time [min] | Area [mV.s] | Height [mV] | Area [%] | Height [%] | W05 [min] |
|----|-------------------|-------------|-------------|----------|------------|-----------|
| 1  | 5.336             | 5.330       | 0.924       | 0.0      | 0.1        | 0.09      |
| 2  | 5.536             | 21.229      | 1.739       | 0.1      | 0.2        | 0.32      |
| 3  | 6.792             | 23.004      | 1.117       | 0.2      | 0.1        | 0.34      |
| 4  | 10.764            | 12.813      | 0.958       | 0.1      | 0.1        | 0.21      |
| 5  | 12.572            | 19.964      | 1.124       | 0.1      | 0.1        | 0.28      |
| 6  | 13.596            | 13972.431   | 739.565     | 96.7     | 98.1       | 0.29      |
| 7  | 16.376            | 24.355      | 1.061       | 0.2      | 0.1        | 0.32      |
| 8  | 18.248            | 33.287      | 0.601       | 0.2      | 0.1        | 0.93      |
| 9  | 29.564            | 216.935     | 4.753       | 1.5      | 0.6        | 0.70      |
| 10 | 39.224            | 75.595      | 1.499       | 0.5      | 0.2        | 0.77      |
| 11 | 49.016            | 47.948      | 0.836       | 0.3      | 0.1        | 0.91      |
|    | Total             | 14452.892   | 754.177     | 100.0    | 100.0      |           |

### 5e chair HPLC

SAMPLE : \_\_\_\_\_  
 ID # : 017  
 LAMP  $\lambda$  : 589 nm  
 CONC : 0.02000 g/ml  
 CELL LG: 010 mm  
 TEMP CORR: +0.00037  
 INTERVAL: 1 min

SPECIFIC ROTATION  $[\alpha]$   
 COUNT  $[\alpha](^\circ)$  TEMP  $(^\circ\text{C})$   
 01 + 18.4999 19.9  
 02 + 20.2499 19.9  
 03 + 19.2499 19.9  
 04 + 18.4999 19.9  
 05 + 18.2499 19.9  
 06 + 15.9999 19.9  
 07 + 15.4999 19.9  
 08 + 13.4999 19.9  
 09 + 13.4999 19.9  
 10 + 12.7499 19.9

MEAN = + 16.5999°  
 $\sigma(N-1)$  = 2.7059°  
 C. V. = + 16.3010%

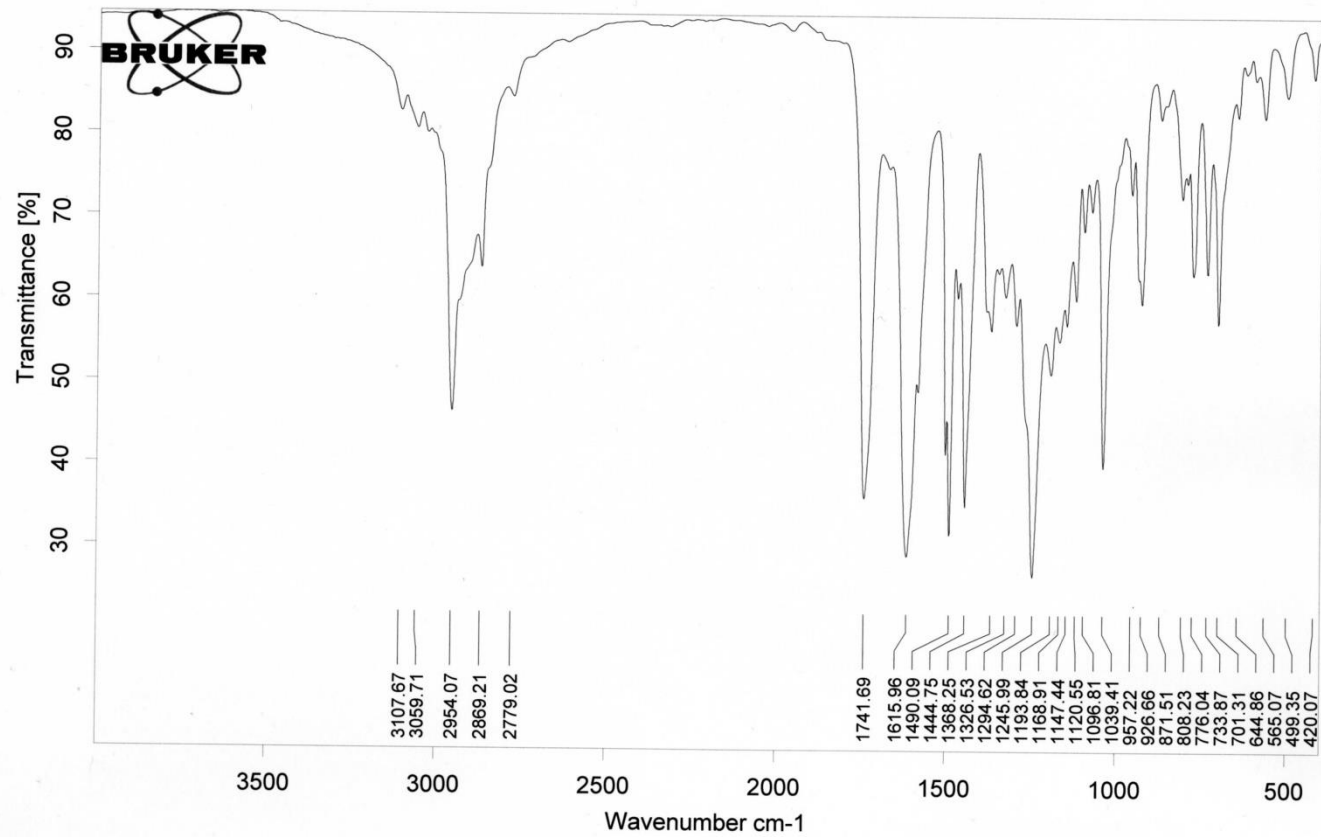

D:\temp-files\FTIR files\201501\20150121\MIR\_TR\_DTGS\_blank KBr\_chang703201.0.dpt

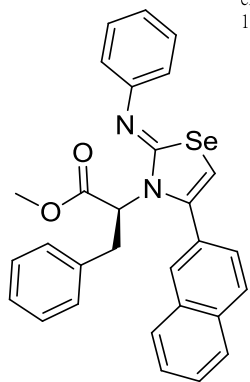

chang  
1H

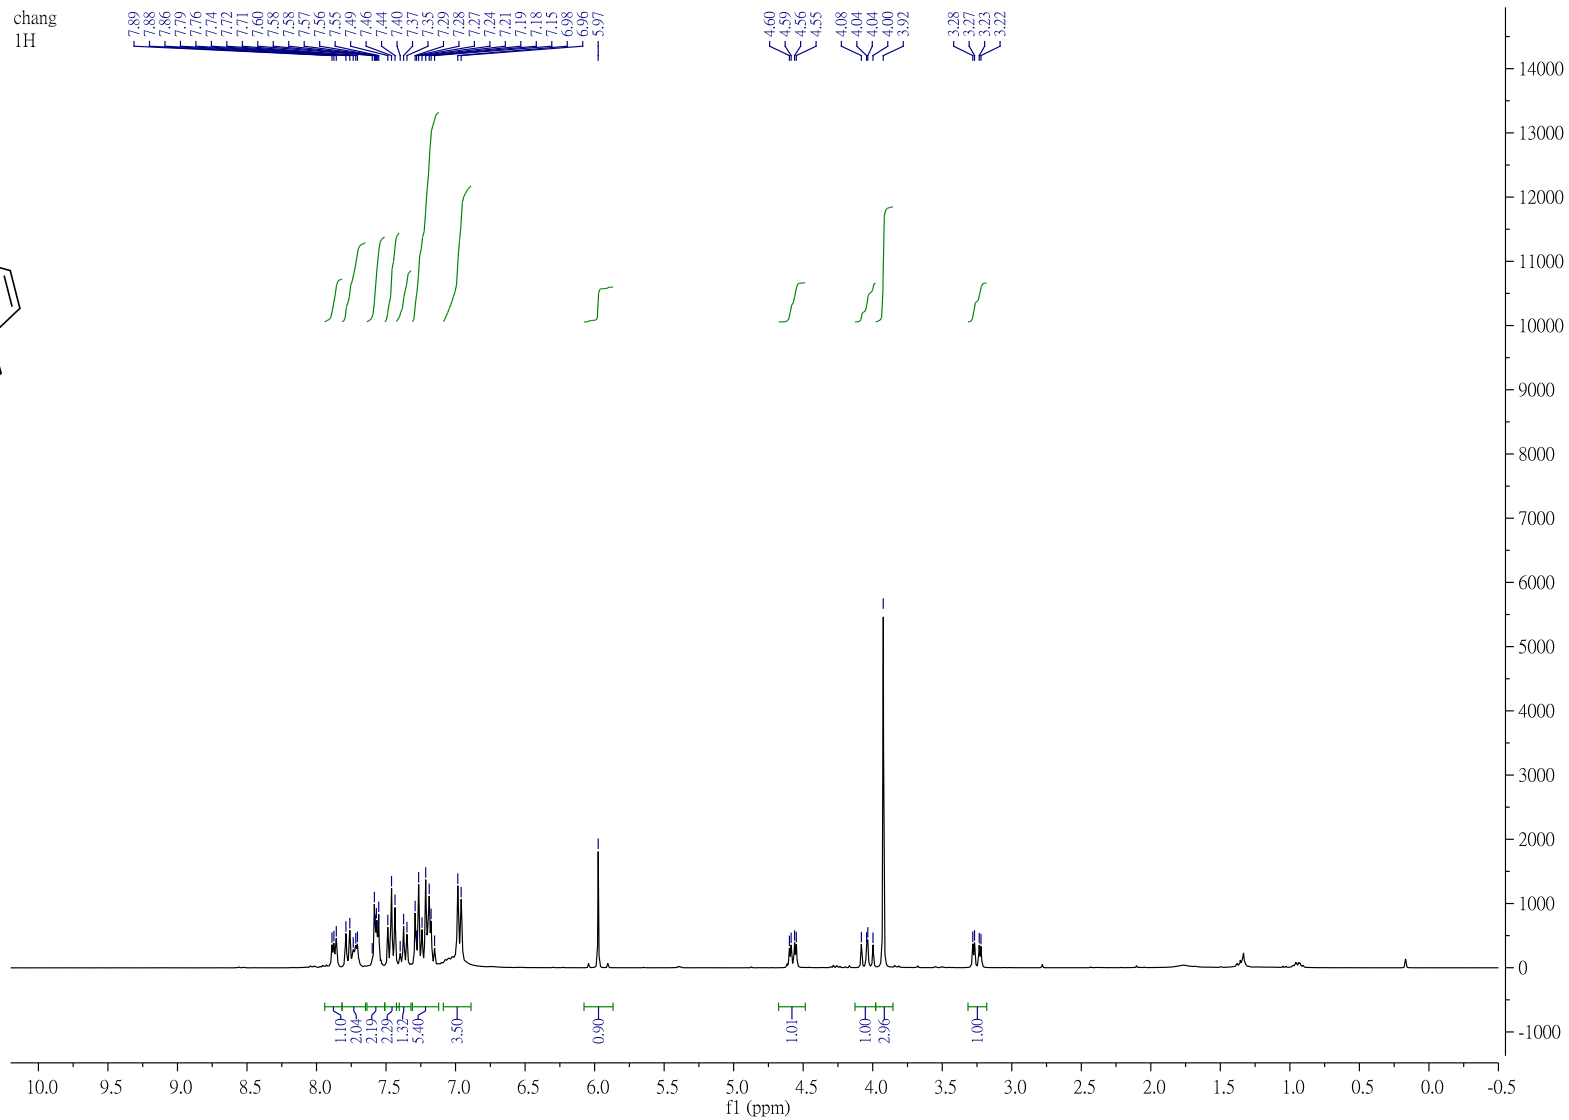

5f <sup>1</sup>H NMR

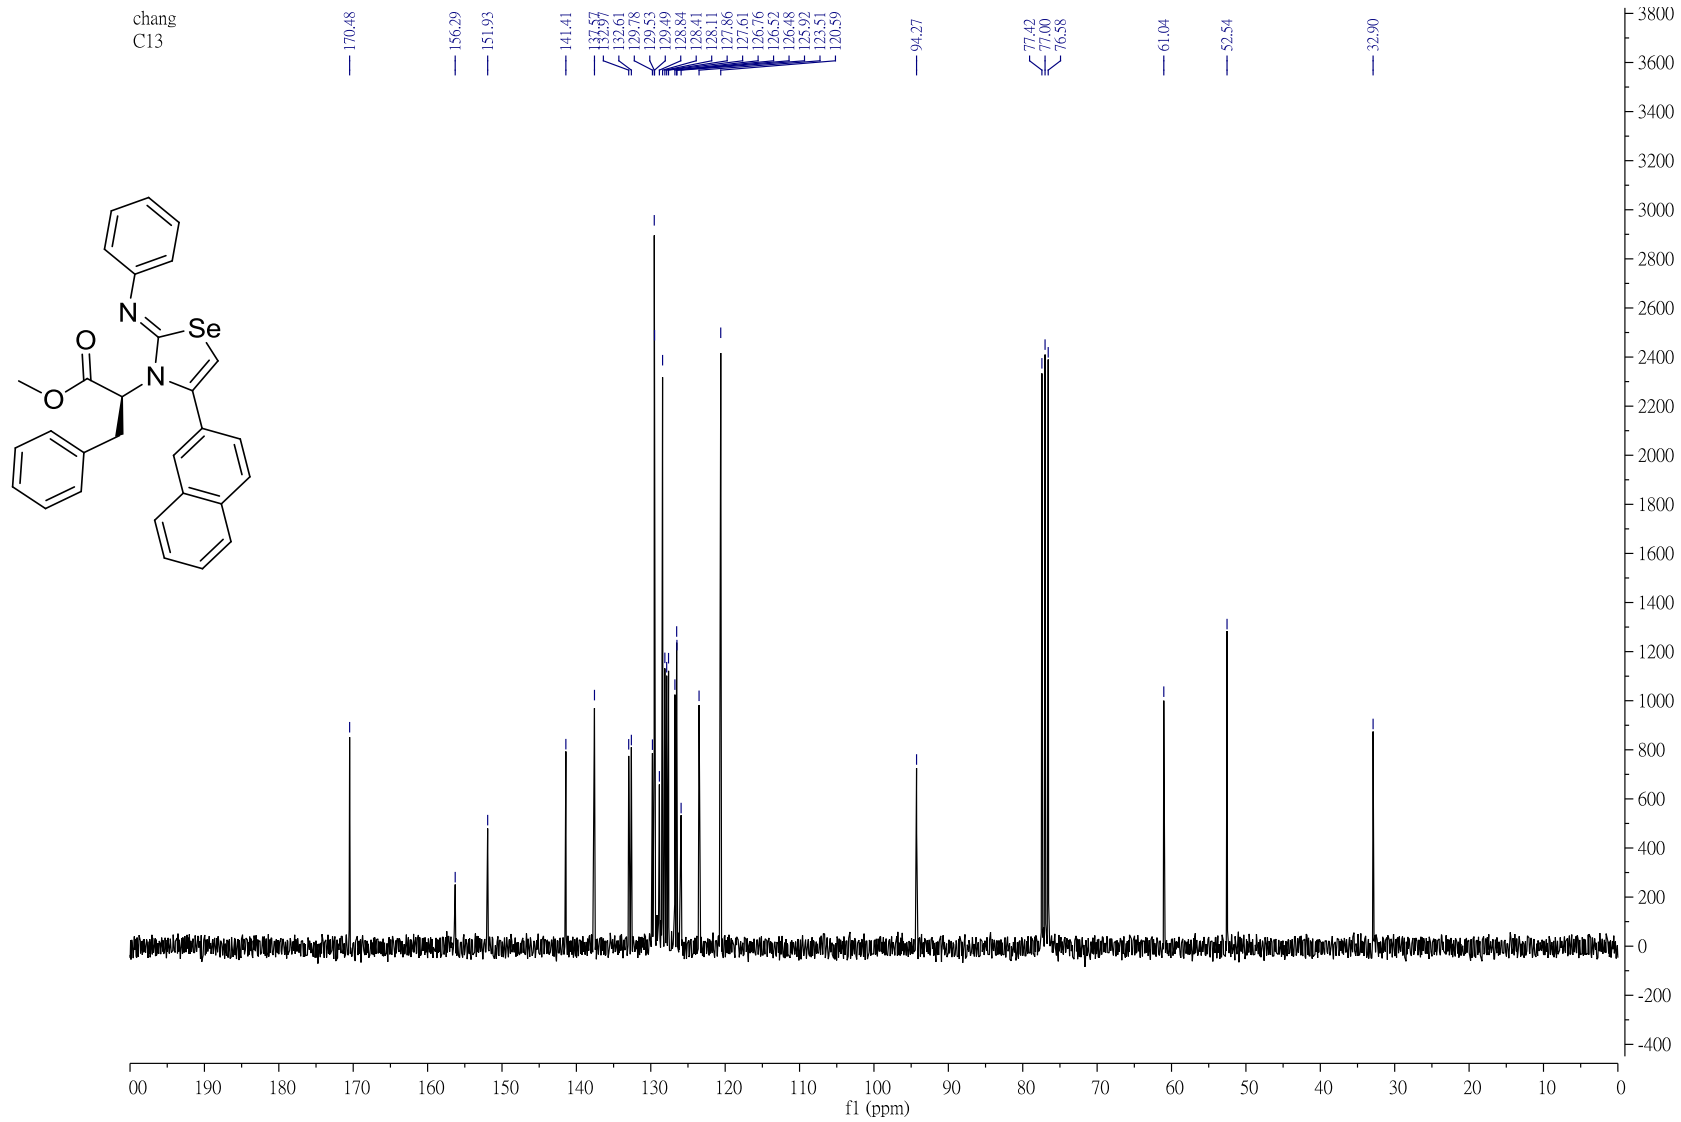

5f C<sup>13</sup>NMR

S84

chang504701

2012040614 38 (2.603) Cn (Cen.2, 60.00, Ht); Sm (Mn, 2x0.75); Sb (3,40.00); Cm (23:40-11:17x2.000)

Scan ES+  
3.40e7

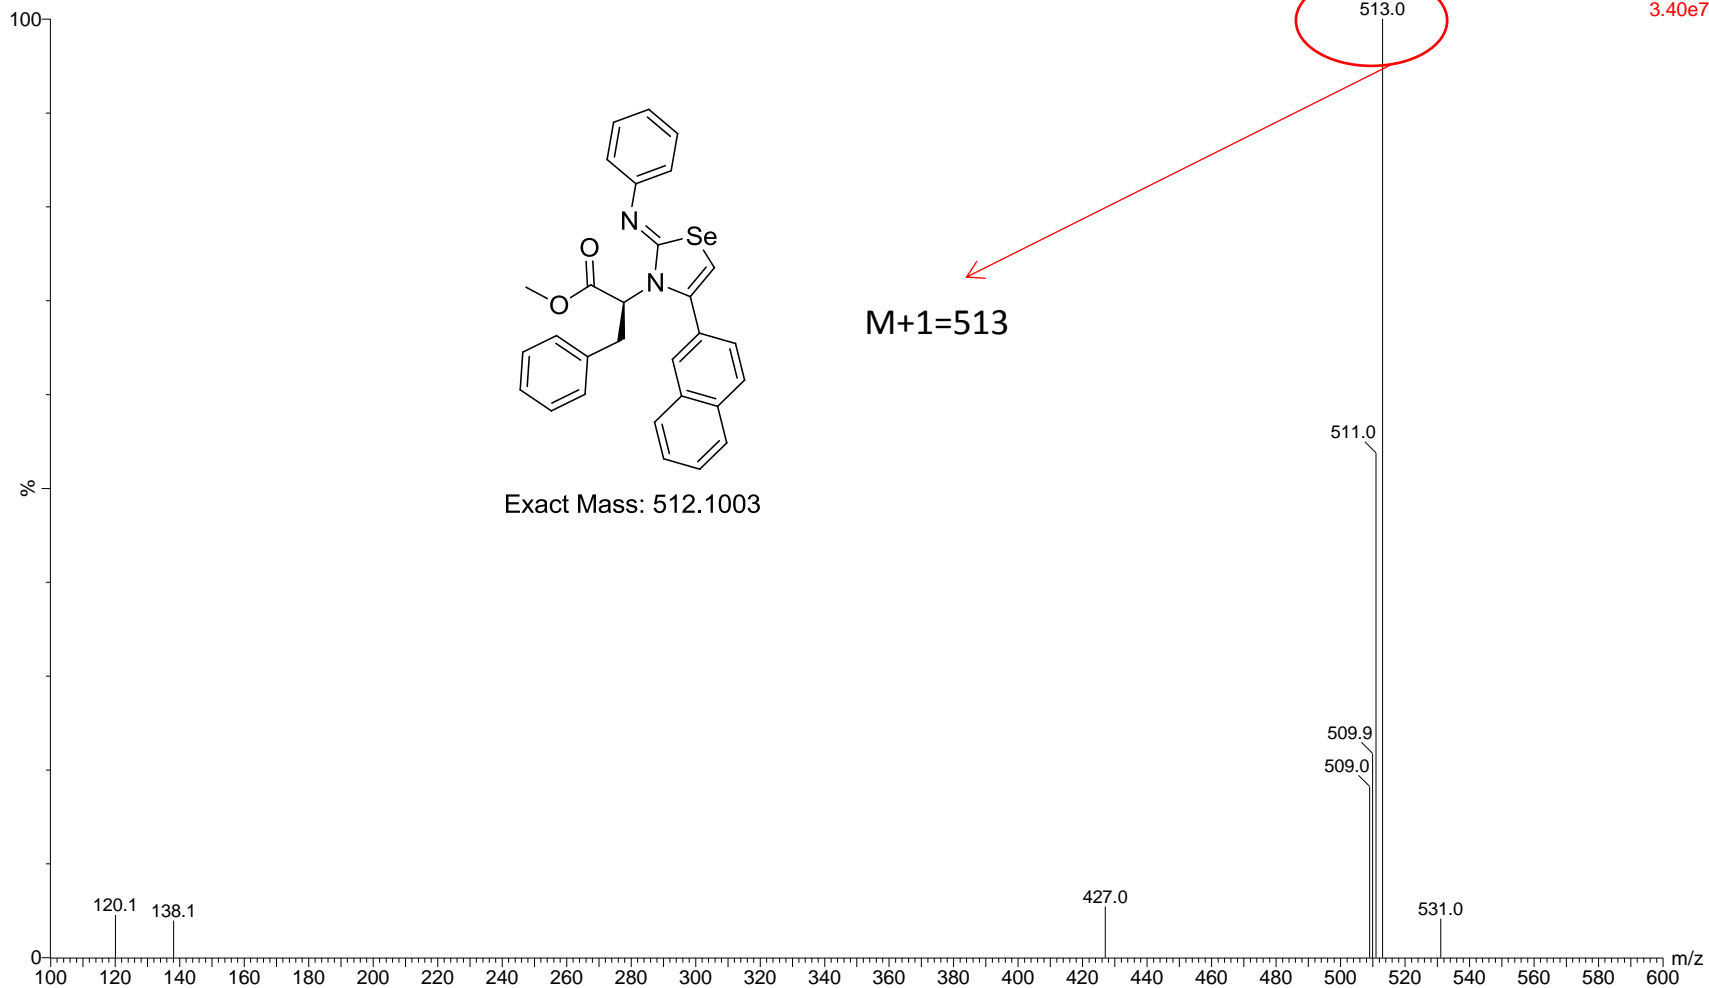

5f LR-MS

6f ESI+  
Molecular Formula: C<sub>29</sub>H<sub>25</sub>N<sub>2</sub>O<sub>2</sub>Se  
Exact Mass: 513.1081  
Measured Mass: 513.1077

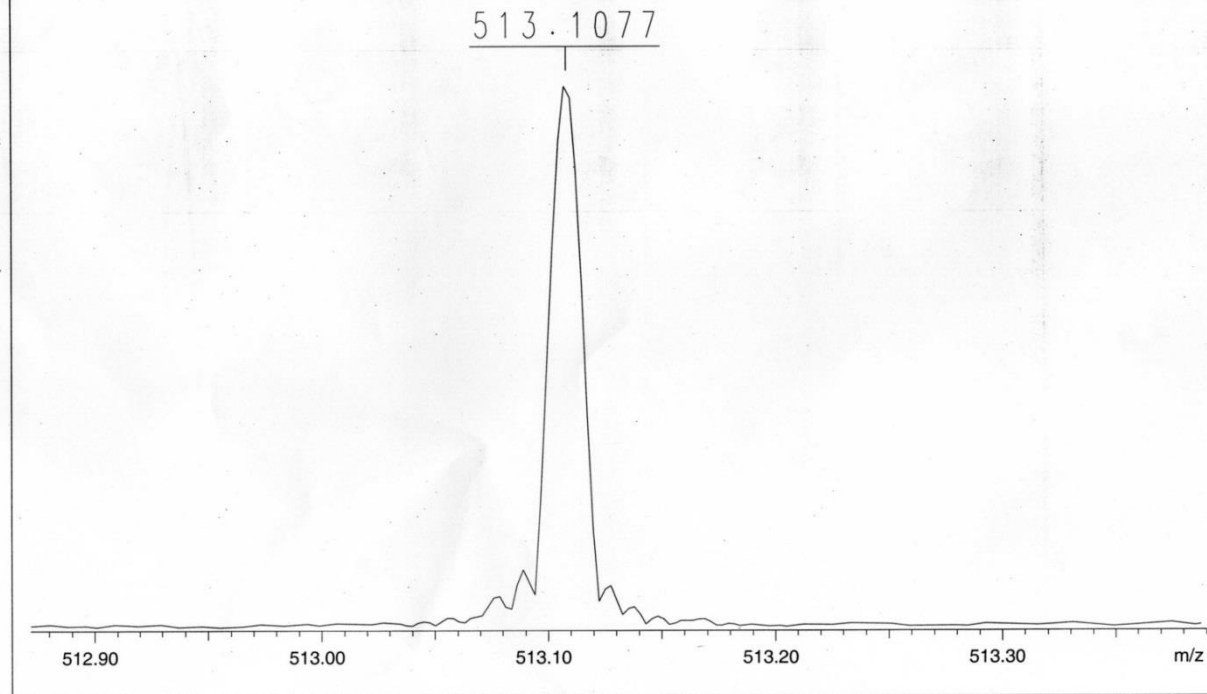

/d=/Data/6f/2/pdata/1 Administrator Wed Mar 13 12:24:39 2013

5f HR-MS

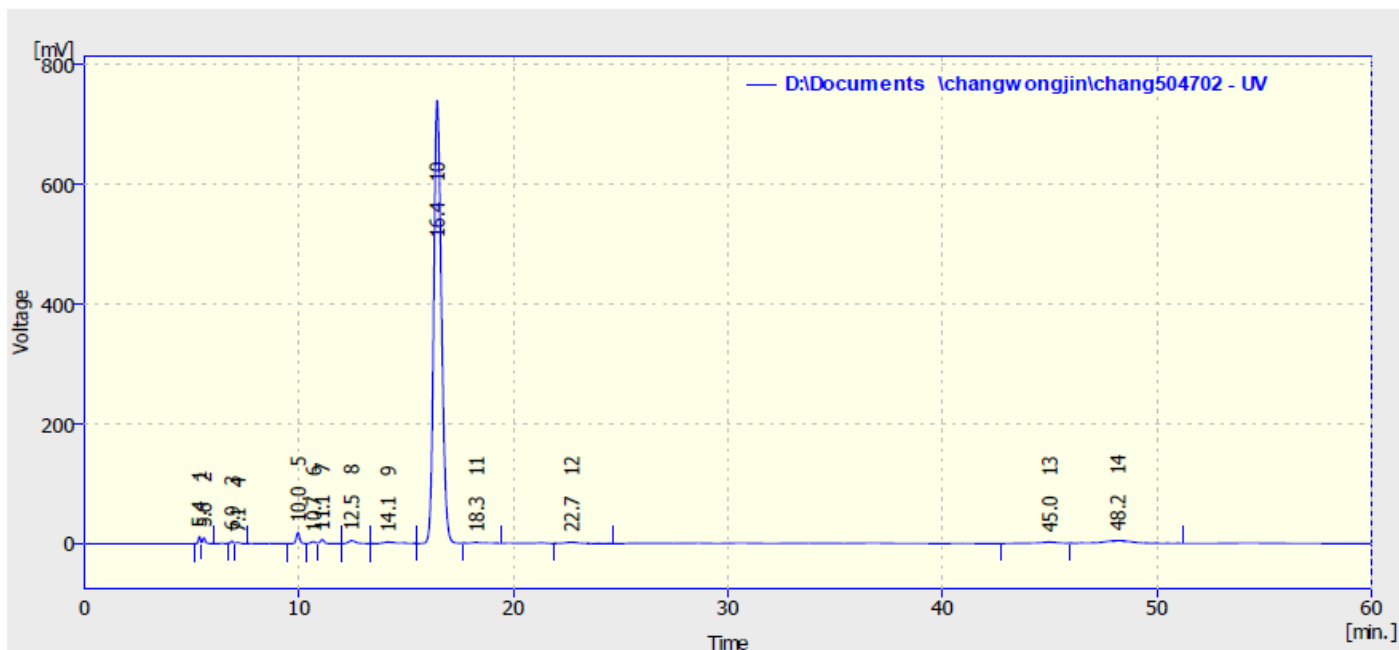

Result Table (Uncal - D:\Documents [changwongjin]chang504702 - UV)

|    | Reten. Time [min] | Area [mV.s] | Height [mV] | Area [%] | Height [%] |
|----|-------------------|-------------|-------------|----------|------------|
| 1  | 5.360             | 84.494      | 11.888      | 0.4      | 1.5        |
| 2  | 5.576             | 88.819      | 9.501       | 0.4      | 1.2        |
| 3  | 6.880             | 33.937      | 4.293       | 0.2      | 0.5        |
| 4  | 7.148             | 21.741      | 1.776       | 0.1      | 0.2        |
| 5  | 9.956             | 199.560     | 18.178      | 1.0      | 2.2        |
| 6  | 10.672            | 48.946      | 3.116       | 0.2      | 0.4        |
| 7  | 11.092            | 86.050      | 6.647       | 0.4      | 0.8        |
| 8  | 12.452            | 108.955     | 4.559       | 0.5      | 0.6        |
| 9  | 14.148            | 106.838     | 2.443       | 0.5      | 0.3        |
| 10 | 16.444            | 18479.281   | 739.517     | 92.2     | 91.0       |
| 11 | 18.264            | 72.691      | 1.650       | 0.4      | 0.2        |
| 12 | 22.708            | 89.729      | 2.220       | 0.4      | 0.3        |
| 13 | 45.004            | 159.266     | 2.264       | 0.8      | 0.3        |
| 14 | 48.172            | 458.907     | 4.756       | 2.3      | 0.6        |
|    | Total             | 20039.214   | 812.808     | 100.0    | 100.0      |

### 5f chiral HPLC

SAMPLE : -----  
 ID # : 005  
 LAMP λ : 589 nm  
 CONC : 0.04000 g/ml  
 CELL LG: 010 mm  
 TEMP CORR: +0.00037  
 INTERVAL: 1 min

SPECIFIC ROTATION [α]<sub>D</sub>  
 COUNT [α]<sub>D</sub>(°) TEMP(°C)  
 01 - 76.5002 19.3  
 02 - 77.3752 19.3  
 03 - 78.8752 19.3  
 04 - 79.6252 19.3  
 05 - 80.2502 19.3  
 06 - 80.1252 19.3  
 07 - 81.0002 19.3  
 08 - 81.5002 19.3  
 09 - 82.1252 19.4  
 10 - 83.2502 19.4

MEAN = - 80.0627°  
 σ(N-1) = 2.0793°  
 C. V. = 2.5971%

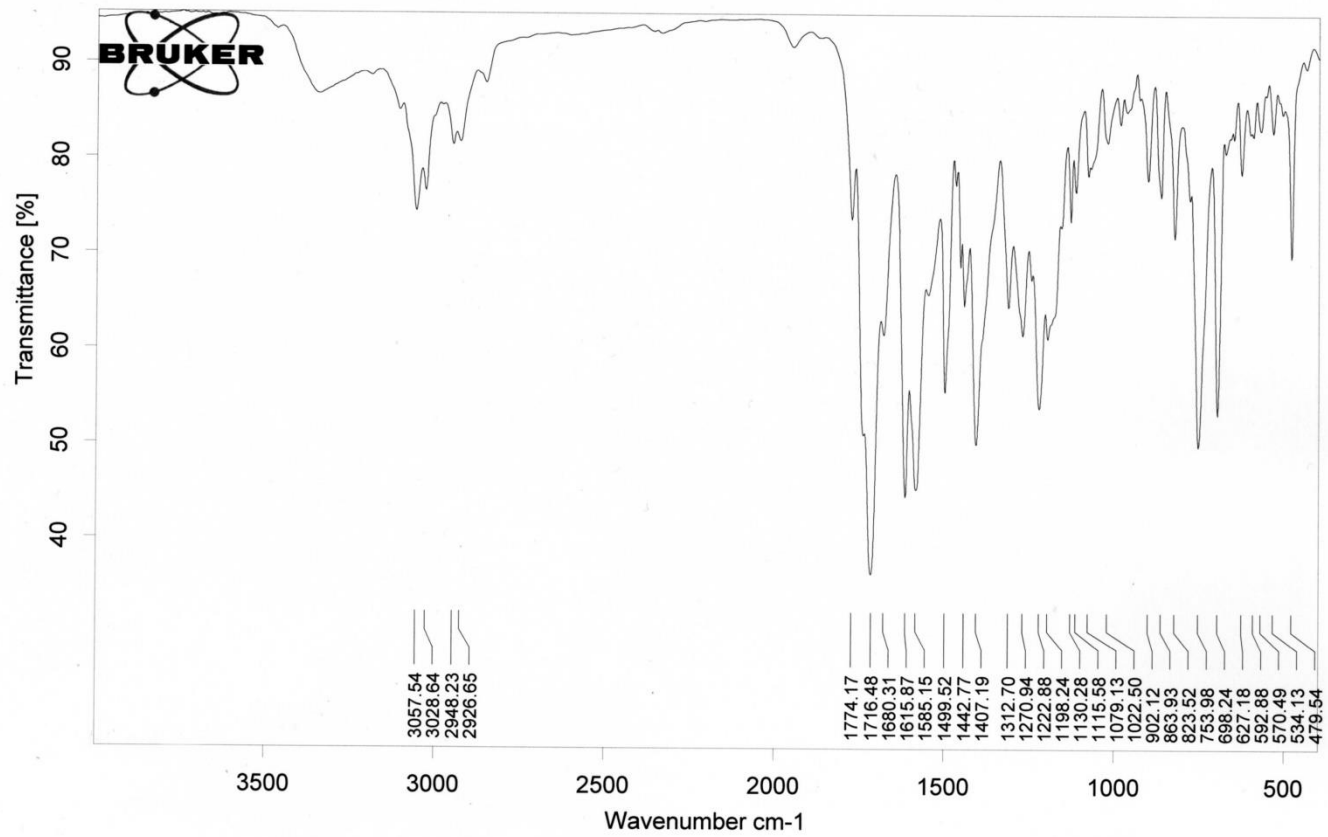

D:\temp-files\FTIR files\201501\20150121\MIR\_TR\_DTGS\_blank KBr\_chang504802.0.dpt



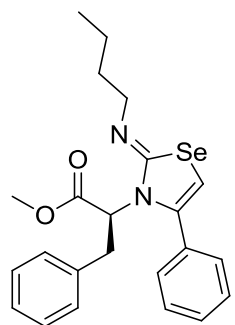

PROTON\_01

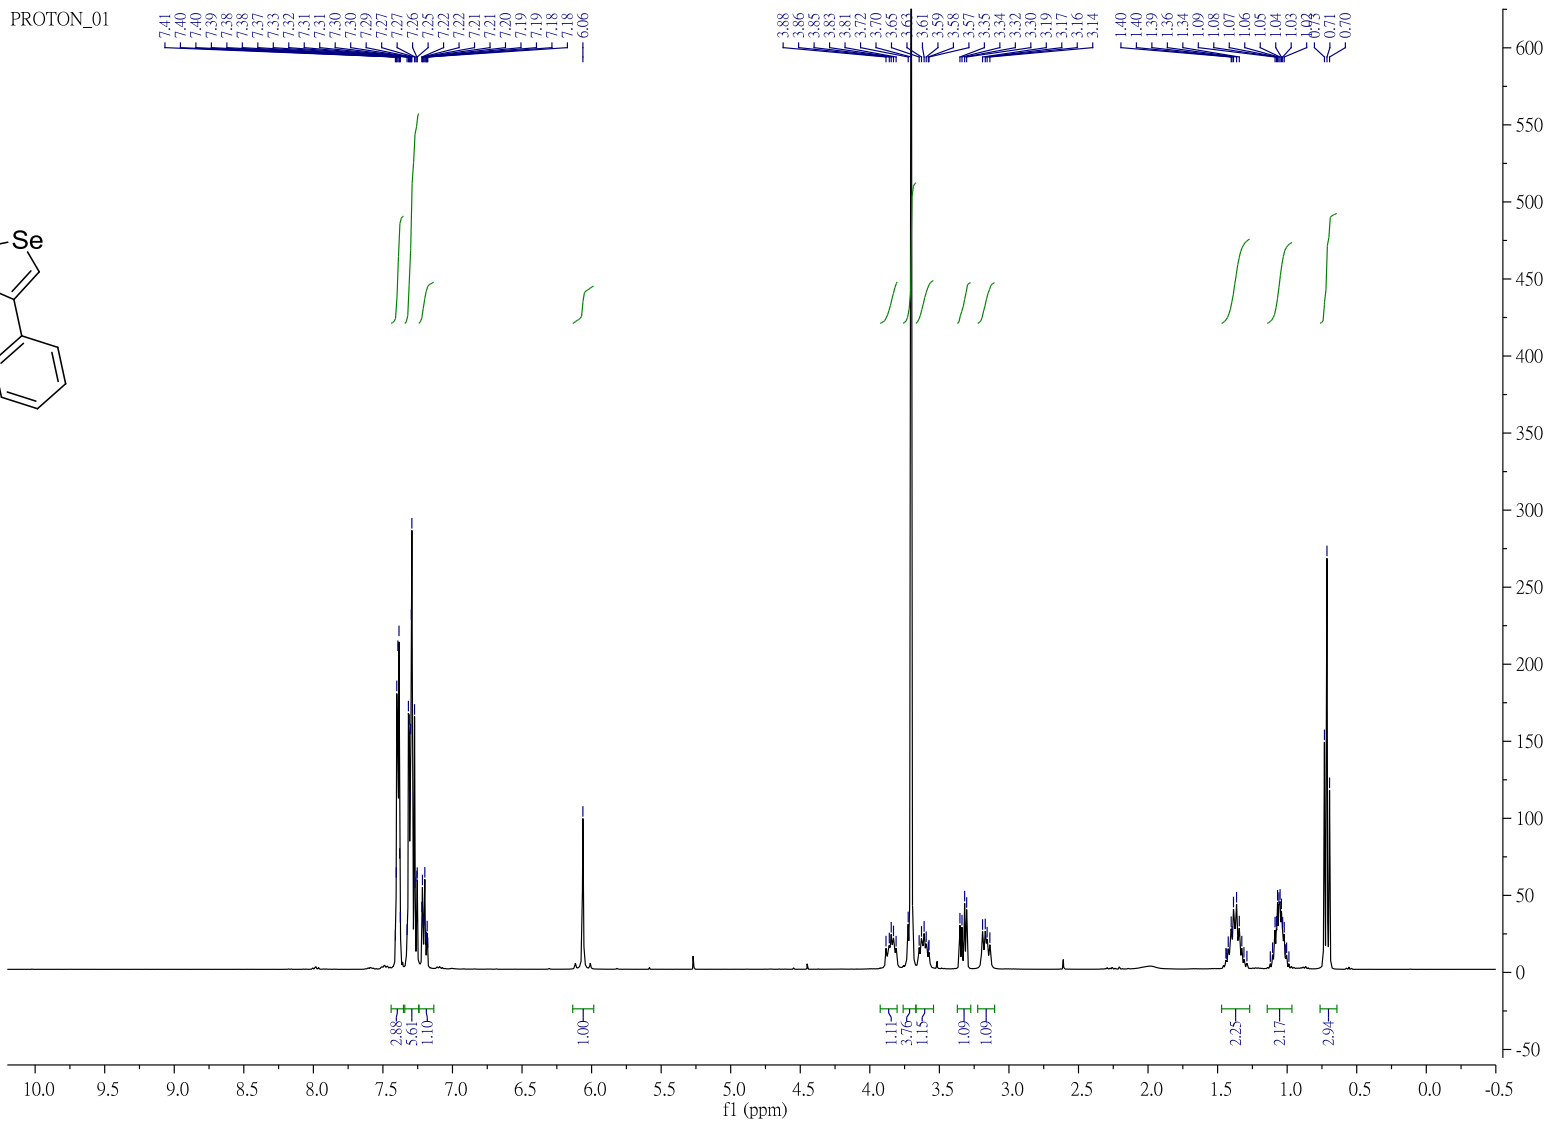

5g  $^1\text{H}$ NMR

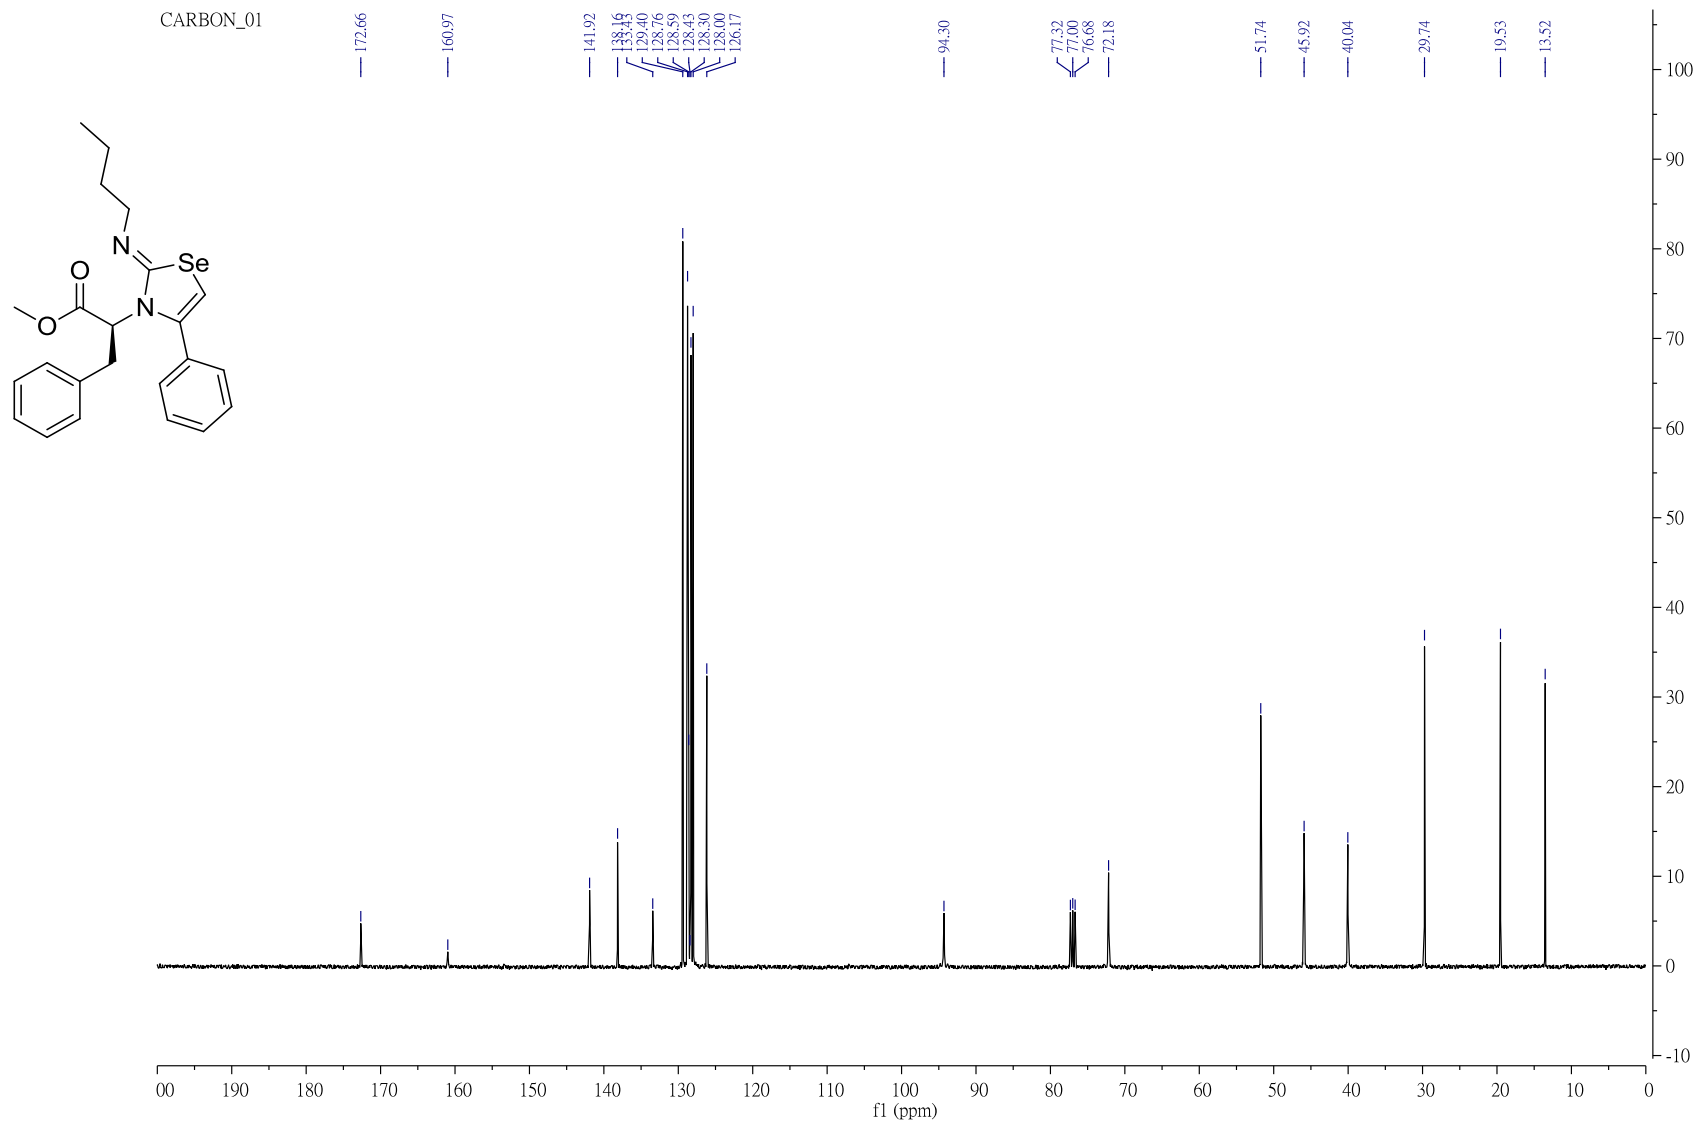

5g C<sup>13</sup>NMR

S90

Chang705801

20140620004 14 (0.959) Cn (Cen,2, 80.00, Ht); Sm (Mn, 2x0.75); Sb (3,20.00); Cm (14:21-2:9x3.000)

Scan ES+  
7.39e7

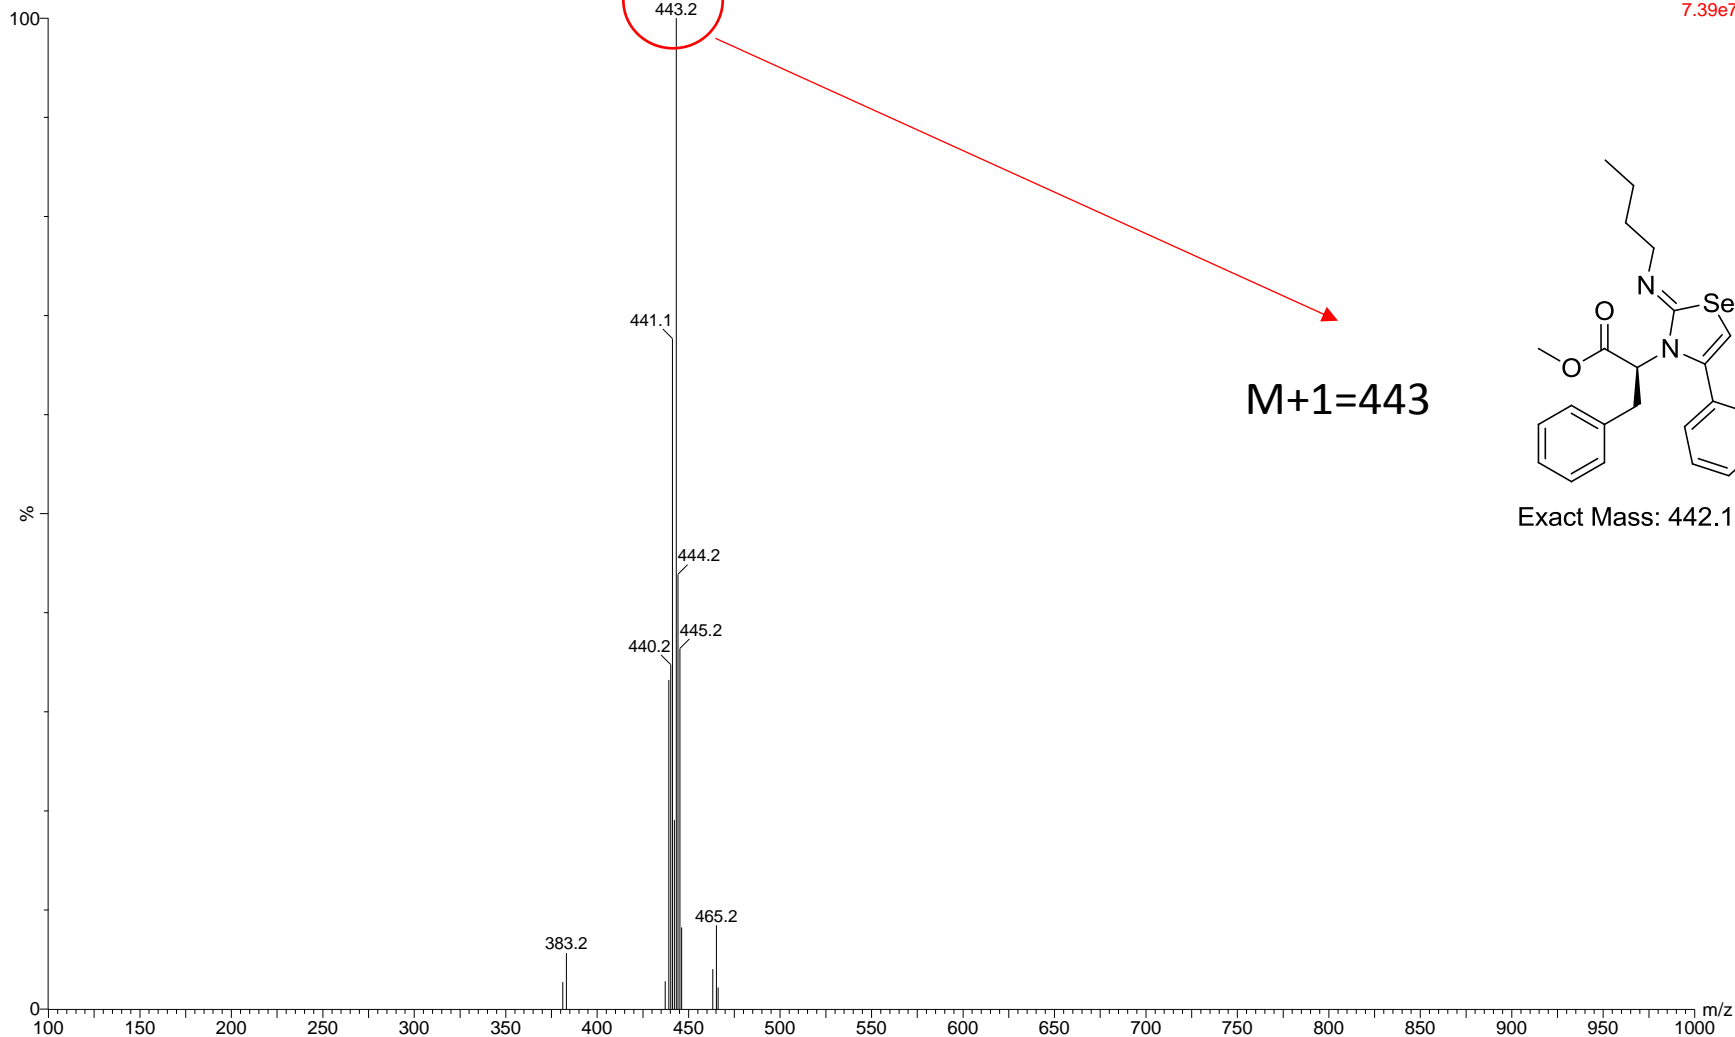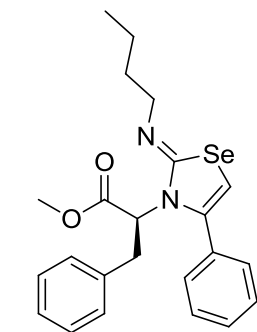

Exact Mass: 442.1159

5g LR-MS

# Display Report

## Analysis Info

Analysis Name D:\Data\NCTU SERVICE\Data\20140626\705801 441 ESI+\_GE4\_01\_2029.d  
Method Small molecule.m  
Sample Name 705801 441 ESI+  
Comment

Acquisition Date 6/26/2014 10:22:43 AM  
Operator NCTU  
Instrument impact HD 1819696.00164

## Acquisition Parameter

|             |          |                      |          |                  |           |
|-------------|----------|----------------------|----------|------------------|-----------|
| Source Type | ESI      | Ion Polarity         | Positive | Set Nebulizer    | 1.0 Bar   |
| Focus       | Active   | Set Capillary        | 4500 V   | Set Dry Heater   | 200 °C    |
| Scan Begin  | 50 m/z   | Set End Plate Offset | -500 V   | Set Dry Gas      | 6.0 l/min |
| Scan End    | 1500 m/z | Set Charging Voltage | 2000 V   | Set Divert Valve | Waste     |
|             |          | Set Corona           | 0 nA     | Set APCI Heater  | 0 °C      |

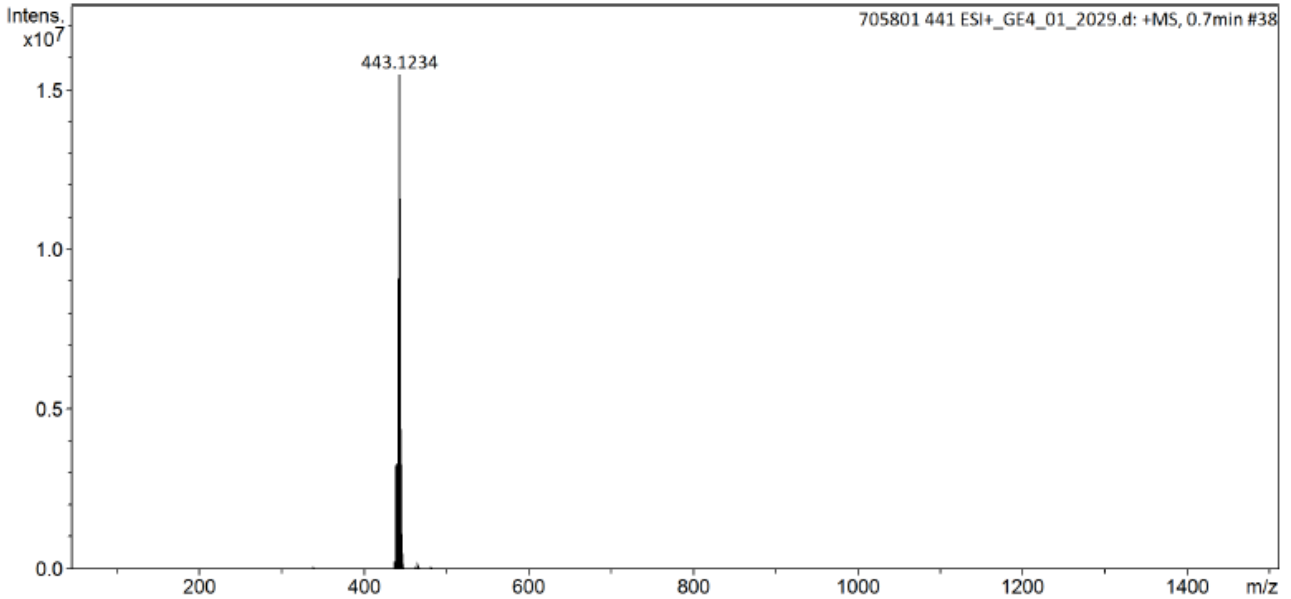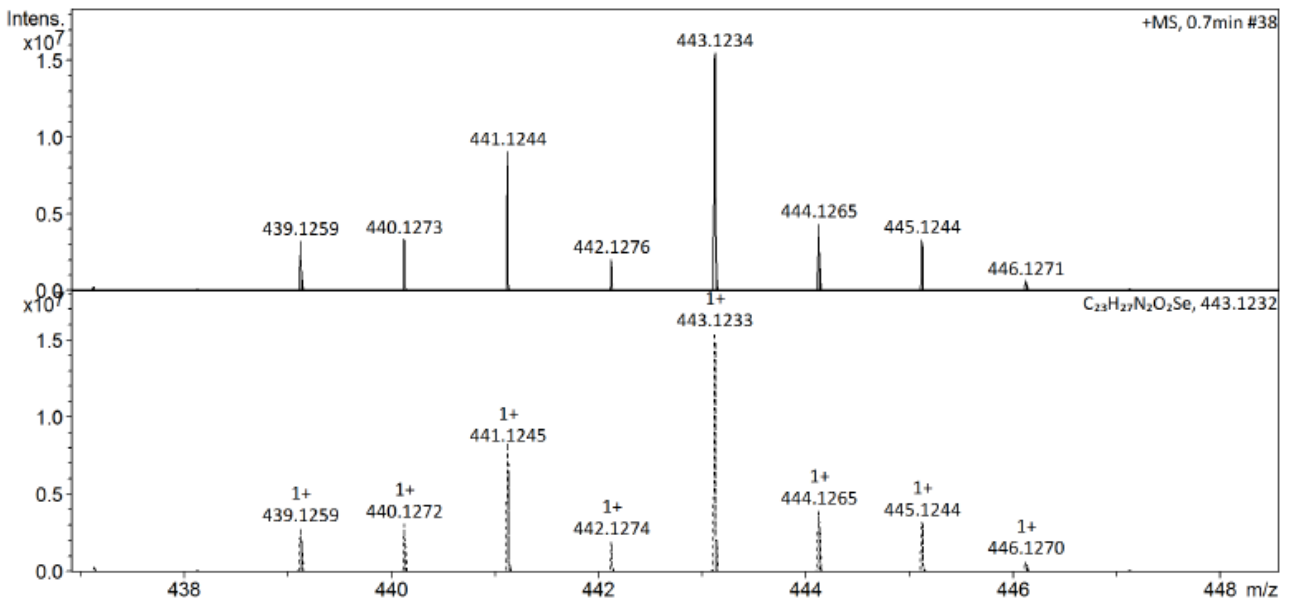

5g HR-MS

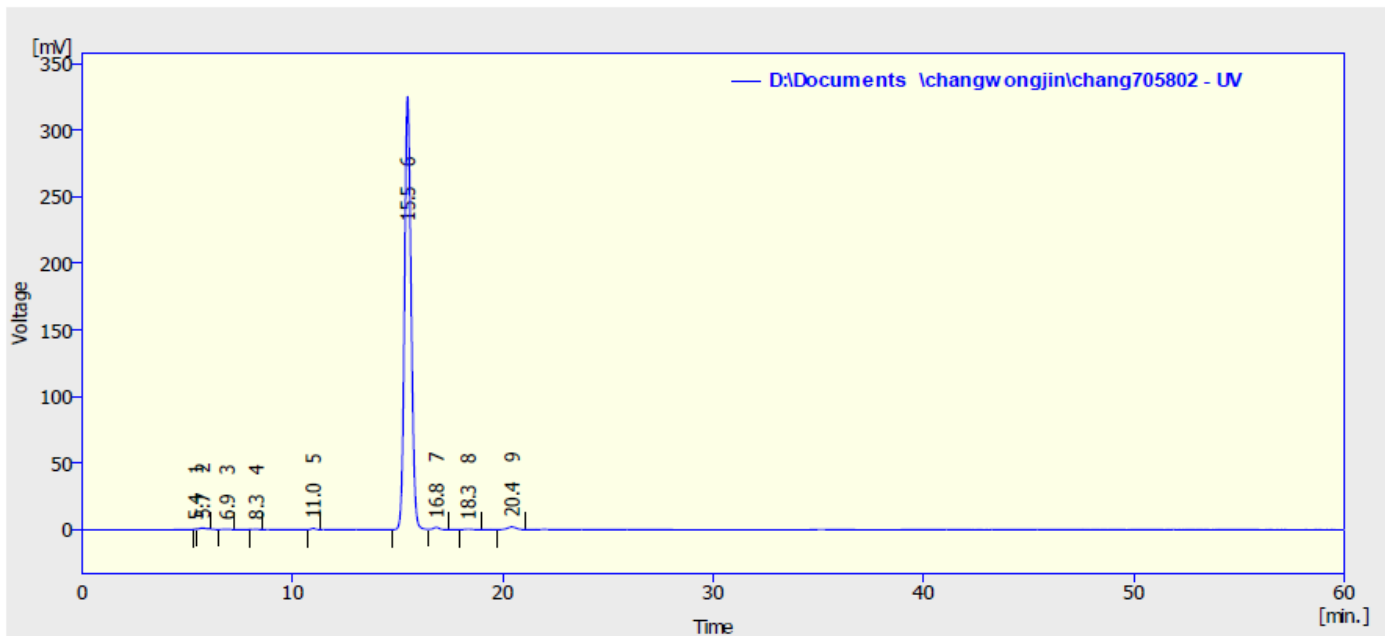

Result Table (Uncal - D:\Documents \changwongjin\chang705802 - UV)

|   | Reten. Time [min] | Area [mV.s] | Height [mV] | Area [%] | Height [%] | W05 [min] |
|---|-------------------|-------------|-------------|----------|------------|-----------|
| 1 | 5.392             | 2.026       | 0.345       | 0.0      | 0.1        | 0.10      |
| 2 | 5.724             | 18.635      | 0.939       | 0.3      | 0.3        | 0.33      |
| 3 | 6.896             | 5.986       | 0.261       | 0.1      | 0.1        | 0.39      |
| 4 | 8.264             | 4.579       | 0.260       | 0.1      | 0.1        | 0.29      |
| 5 | 10.988            | 11.450      | 0.916       | 0.2      | 0.3        | 0.20      |
| 6 | 15.468            | 7098.171    | 324.964     | 98.0     | 97.9       | 0.34      |
| 7 | 16.840            | 34.370      | 1.693       | 0.5      | 0.5        | 0.31      |
| 8 | 18.348            | 9.593       | 0.407       | 0.1      | 0.1        | 0.37      |
| 9 | 20.436            | 58.700      | 2.012       | 0.8      | 0.6        | 0.46      |
|   | Total             | 7243.511    | 331.798     | 100.0    | 100.0      |           |

### 5g chair HPLC

SAMPLE : -----  
 ID # : 013  
 LAMP  $\lambda$  : 589 nm  
 CONC : 0.05000 g/ml  
 CELL LG: 010 mm  
 TEMP CORR: +0.00037  
 INTERVAL: 1 min

SPECIFIC ROTATION  $[\alpha]$   
 COUNT  $[\alpha](^\circ)$  TEMP( $^\circ\text{C}$ )  
 01 -365.9000 20.4  
 02 -366.0000 20.4  
 03 -366.2000 20.4  
 04 -366.4000 20.4  
 05 -366.7000 20.4  
 06 -366.8000 20.4  
 07 -367.0000 20.4  
 08 -367.2000 20.4  
 09 -367.5000 20.4  
 10 -367.8000 20.4

MEAN = -366.7500°  
 $\sigma(N-1)$  = 0.63640°  
 C. V. = - 0.17352%

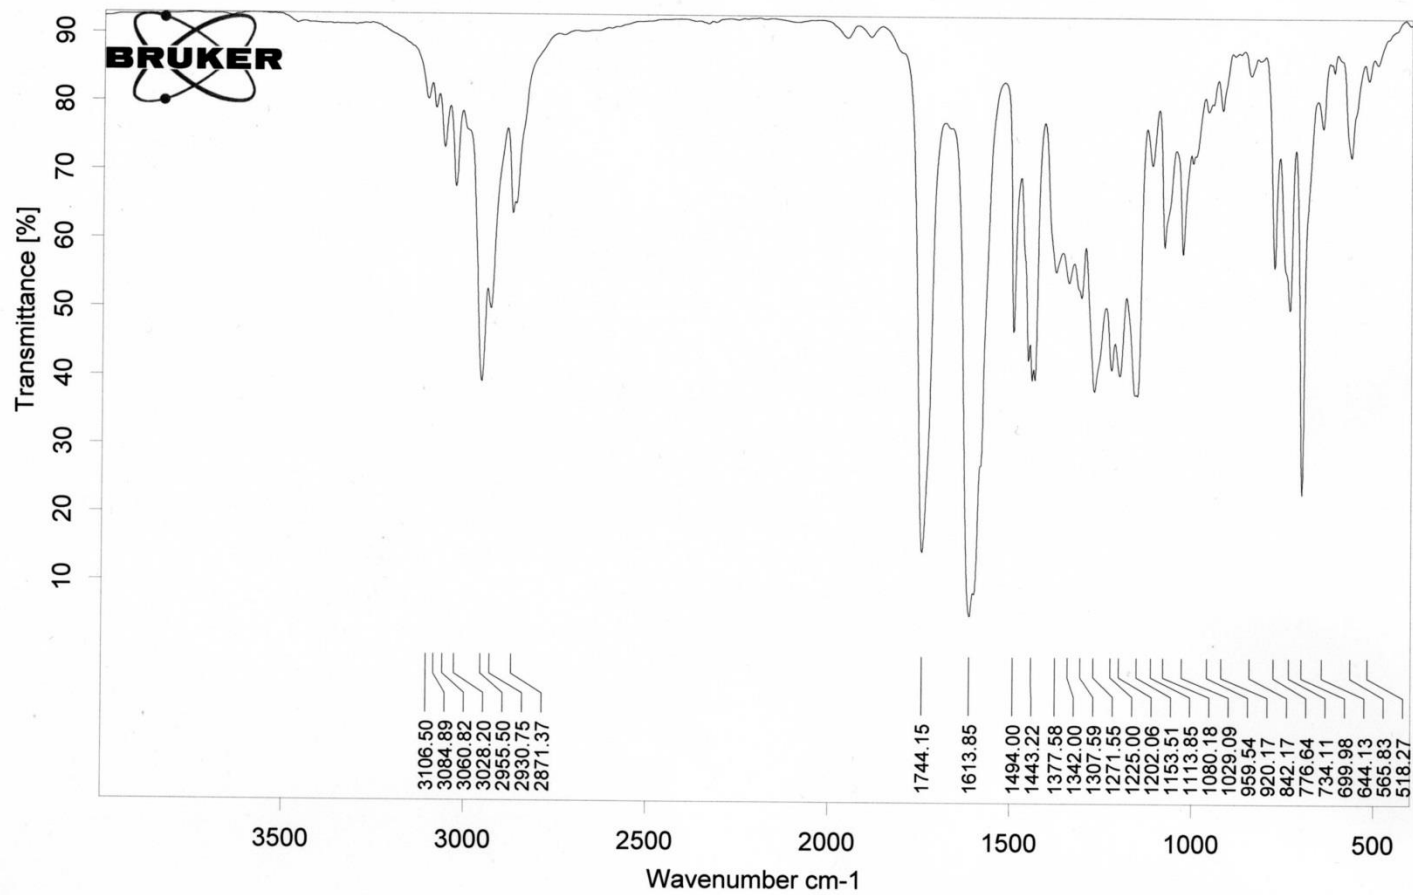

D:\temp-files\FTIR files\201501\20150121\MIR\_TR\_DTGS\_blank KBr\_chang705801.0.dpt

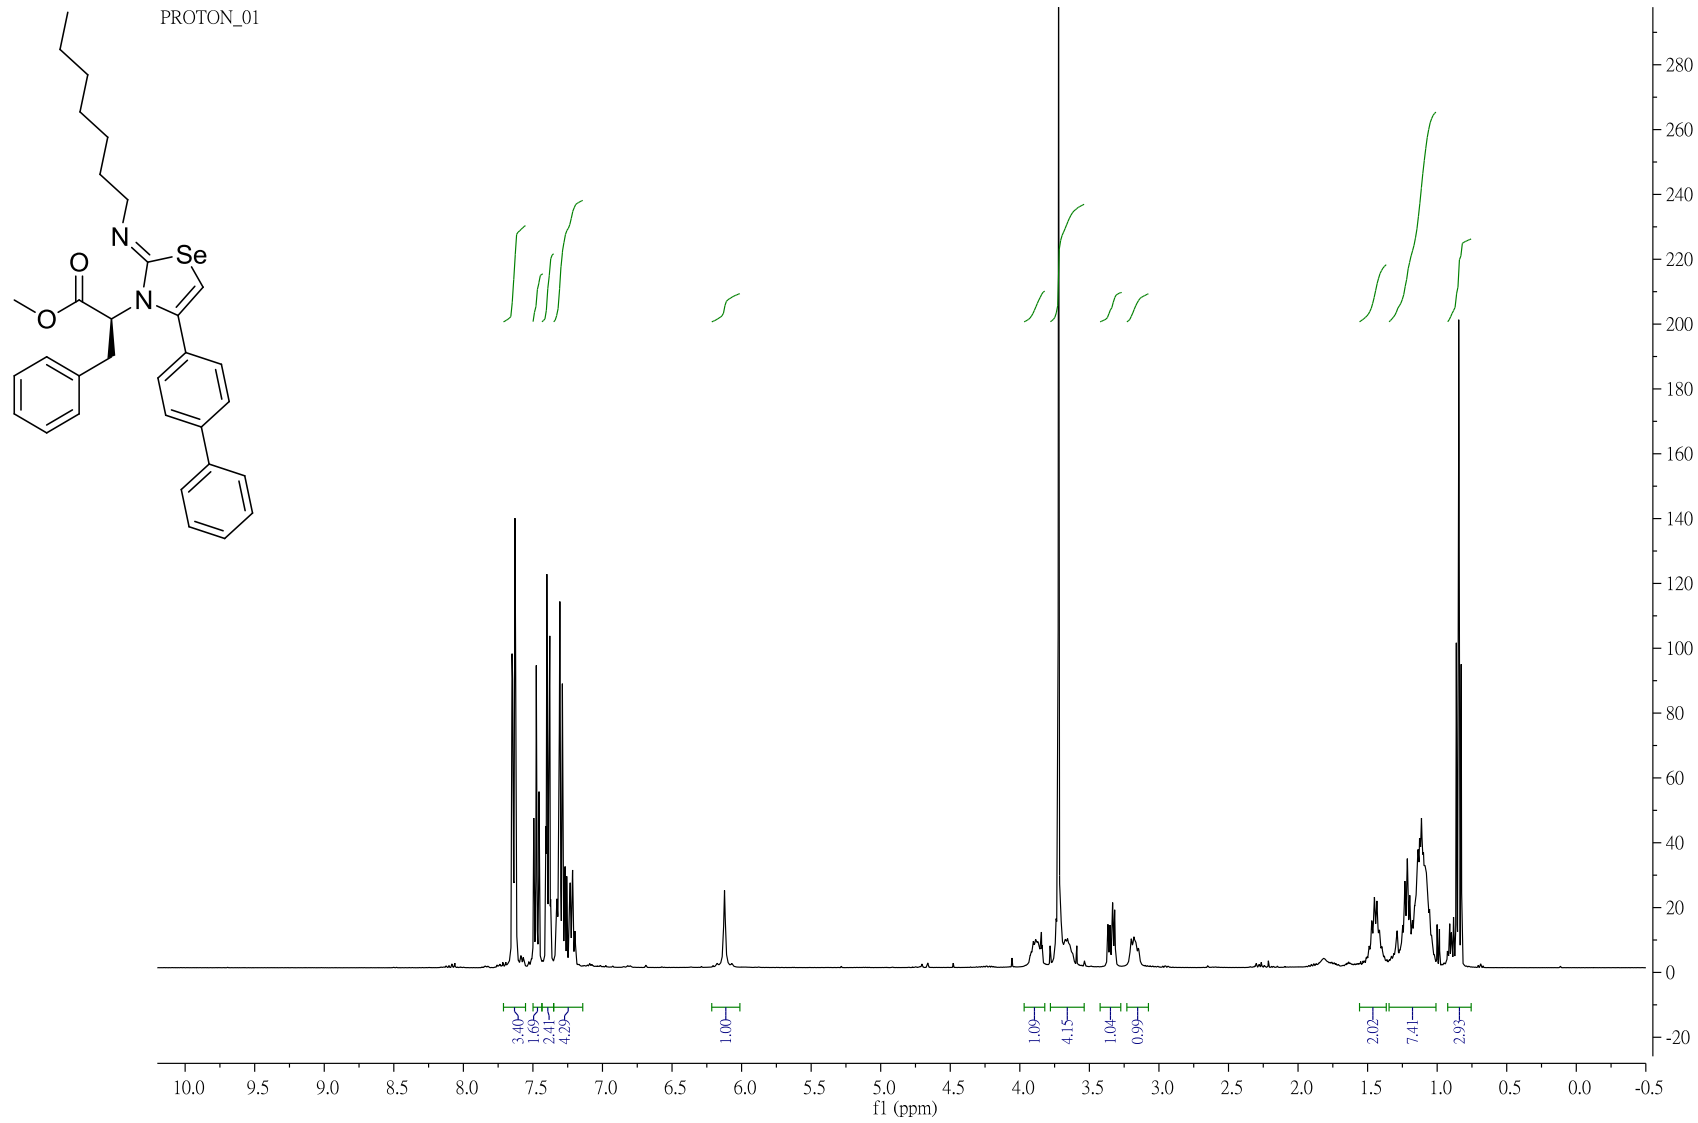

5h  $^1\text{H}$ NMR

S95

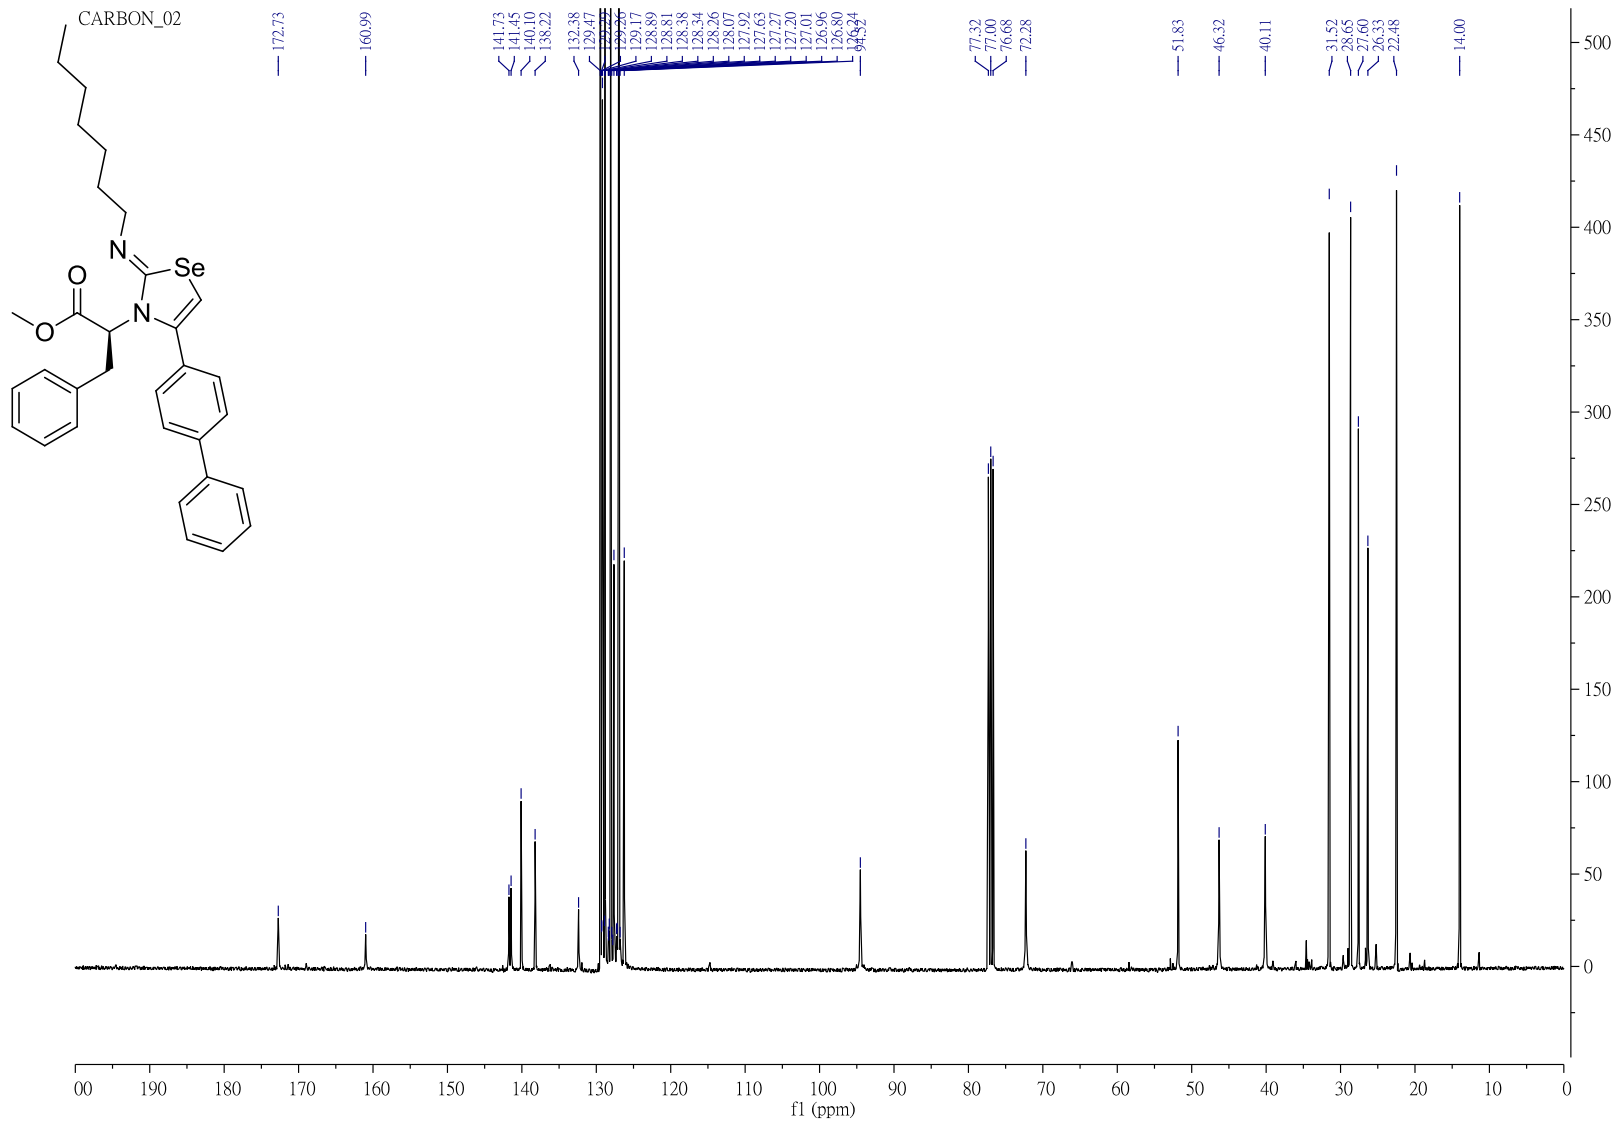

5h  $\text{C}^{13}$  NMR

S96



Chang705601

20140613040 17 (1.164) Cn (Cen,2, 80.00, Ht); Sm (Mn, 2x0.75); Sb (3,60.00 ); Cm (14:21-1:12x3.000)

Scan ES+  
5.02e7

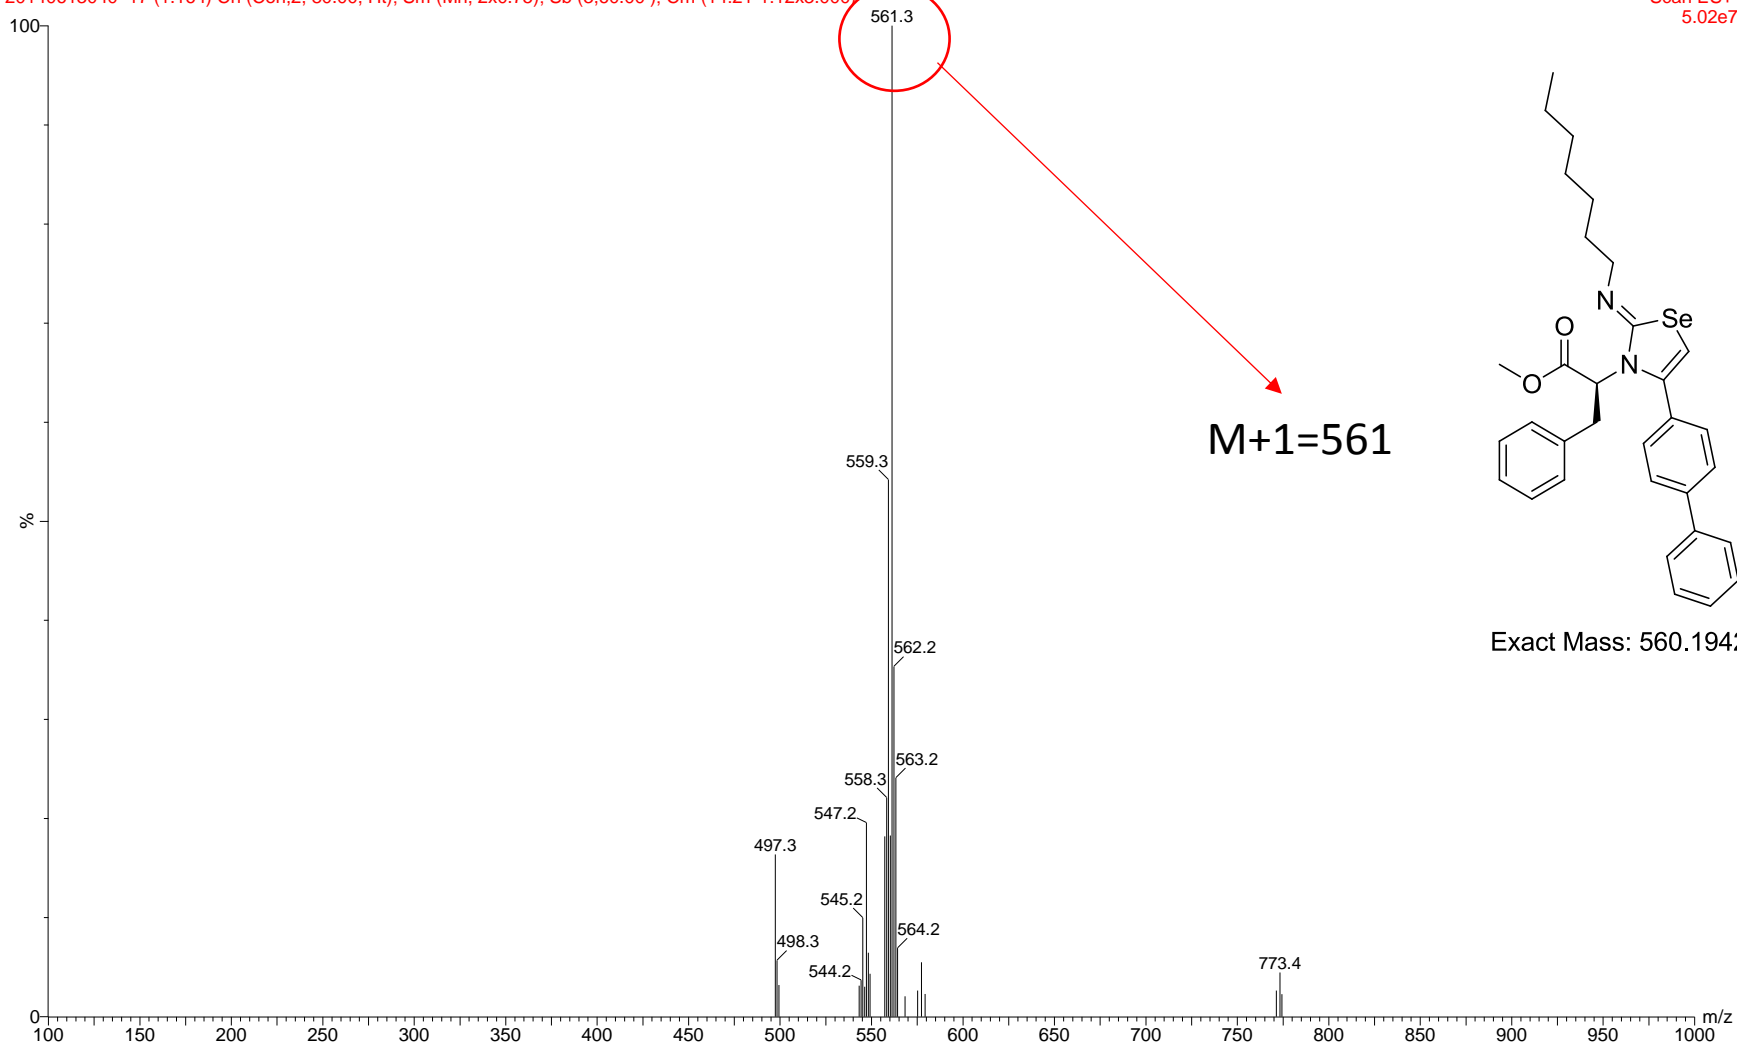

M+1=561

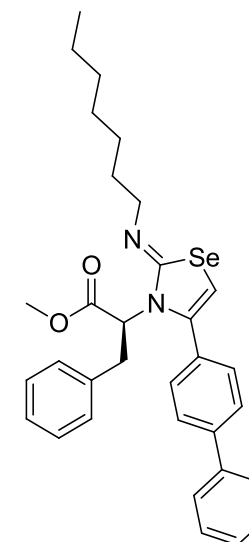

Exact Mass: 560.1942

5h LR-MS

S97

# Display Report

## Analysis Info

Analysis Name D:\Data\NCTU SERVICE\Data\20140626\705601 559 ESI+\_GE2\_01\_2027.d  
Method Small molecule.m  
Sample Name 705601 559 ESI+  
Comment

Acquisition Date 6/26/2014 10:14:05 AM

Operator NCTU  
Instrument impact HD 1819696.00164

## Acquisition Parameter

|             |          |                      |          |                  |           |
|-------------|----------|----------------------|----------|------------------|-----------|
| Source Type | ESI      | Ion Polarity         | Positive | Set Nebulizer    | 1.0 Bar   |
| Focus       | Active   | Set Capillary        | 4500 V   | Set Dry Heater   | 200 °C    |
| Scan Begin  | 50 m/z   | Set End Plate Offset | -500 V   | Set Dry Gas      | 6.0 l/min |
| Scan End    | 1500 m/z | Set Charging Voltage | 2000 V   | Set Divert Valve | Waste     |
|             |          | Set Corona           | 0 nA     | Set APCI Heater  | 0 °C      |

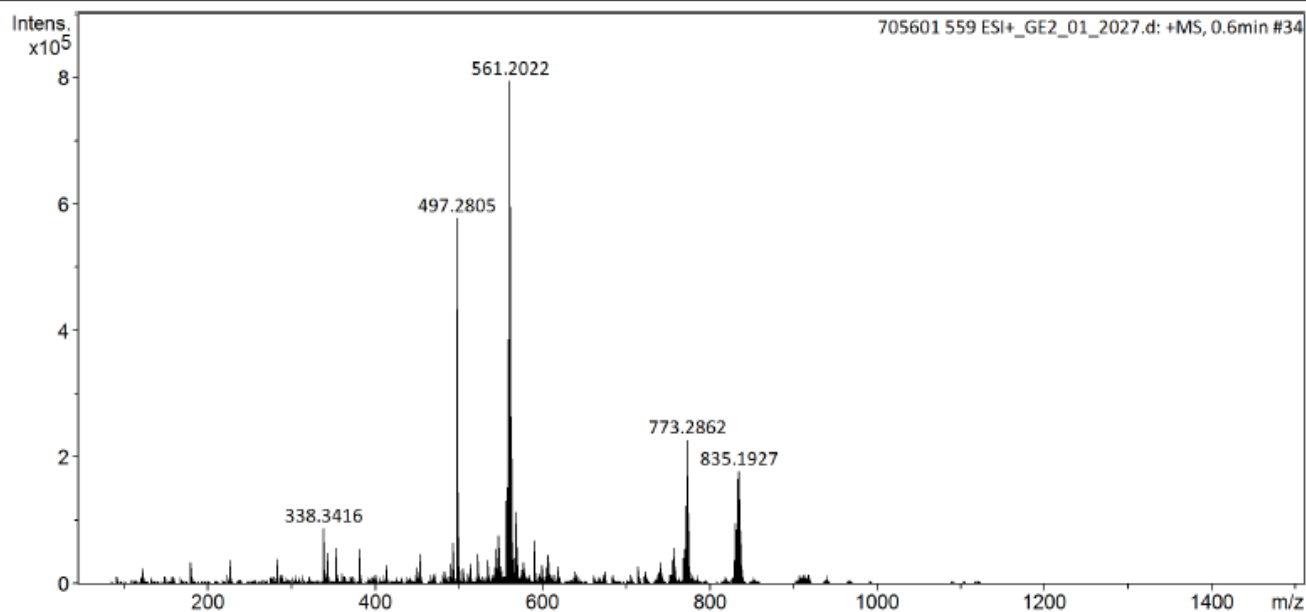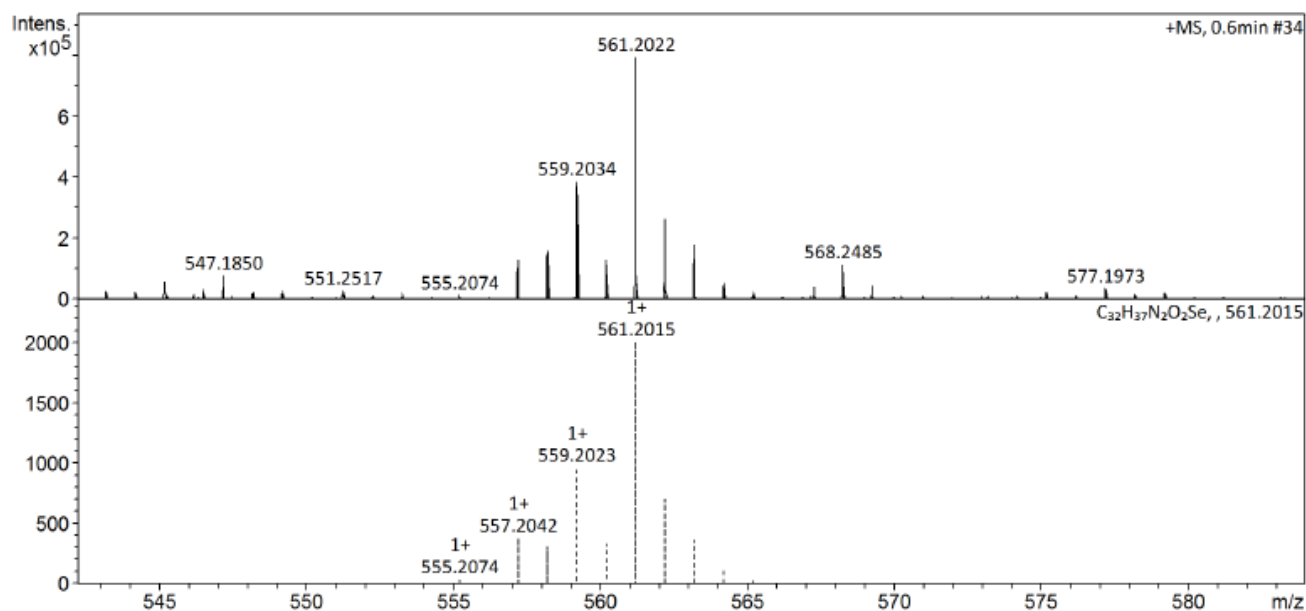

5h HR-MS

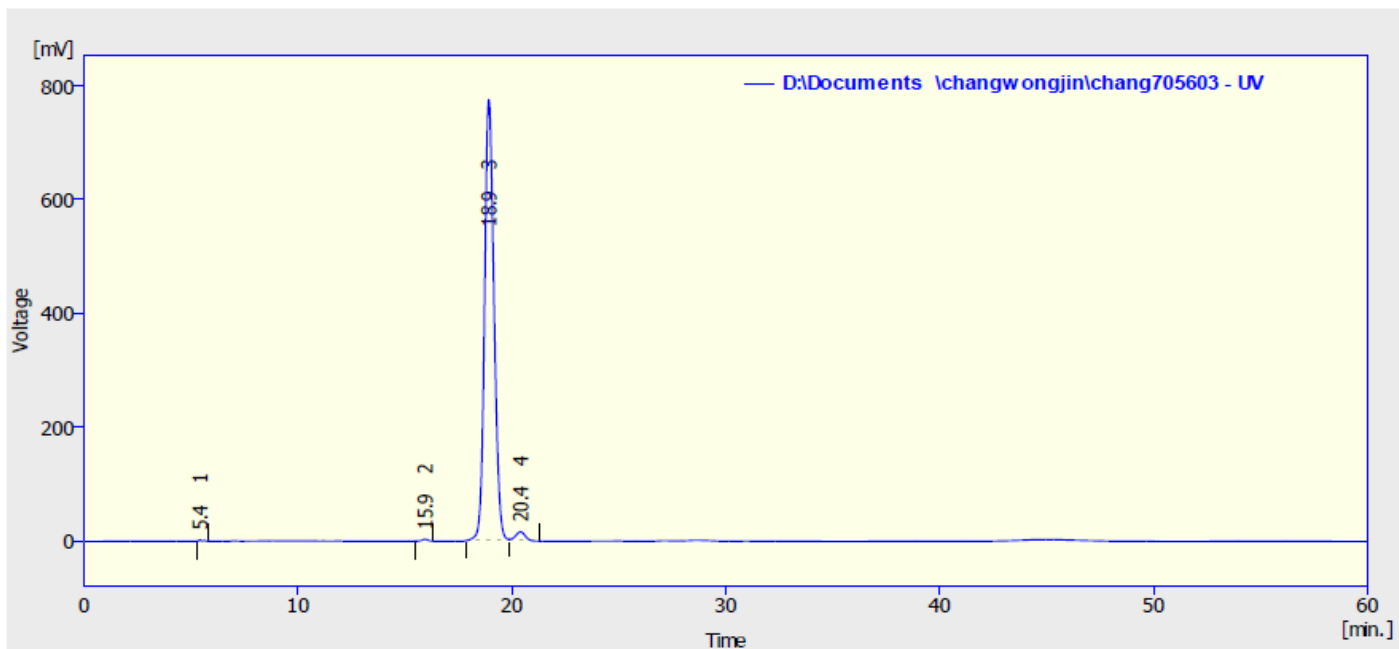

Result Table (Uncal - D:\Documents \changwongjin\chang705603 - UV)

|   | Reten. Time [min] | Area [mV.s] | Height [mV] | Area [%] | Height [%] |
|---|-------------------|-------------|-------------|----------|------------|
| 1 | 5.424             | 28.846      | 2.324       | 0.1      | 0.3        |
| 2 | 15.940            | 67.280      | 3.514       | 0.3      | 0.4        |
| 3 | 18.924            | 23859.500   | 774.547     | 97.4     | 97.2       |
| 4 | 20.408            | 534.313     | 16.218      | 2.2      | 2.0        |
|   | Total             | 24489.938   | 796.604     | 100.0    | 100.0      |

### 5h chiral HPLC

SAMPLE : \_\_\_\_\_  
 ID # : 014  
 LAMP  $\lambda$  : 589 nm  
 CONC : 0.03000 g/ml  
 CELL LG: 010 mm  
 TEMP CORR: +0.00037  
 INTERVAL: 1 min

SPECIFIC ROTATION  $[\alpha]$   
 COUNT  $[\alpha](^\circ)$  TEMP( $^\circ\text{C}$ )

|    |           |      |
|----|-----------|------|
| 01 | + 34.5000 | 20.1 |
| 02 | + 33.5000 | 20.1 |
| 03 | + 32.6667 | 20.1 |
| 04 | + 32.1667 | 20.1 |
| 05 | + 31.5000 | 20.1 |
| 06 | + 30.0000 | 20.1 |
| 07 | + 29.6667 | 20.1 |
| 08 | + 29.0000 | 20.1 |
| 09 | + 28.3333 | 20.1 |
| 10 | + 27.5000 | 20.1 |

MEAN = + 30.8833°  
 $\sigma(N-1)$  = 2.3307°  
 C. V. = + 7.5469%

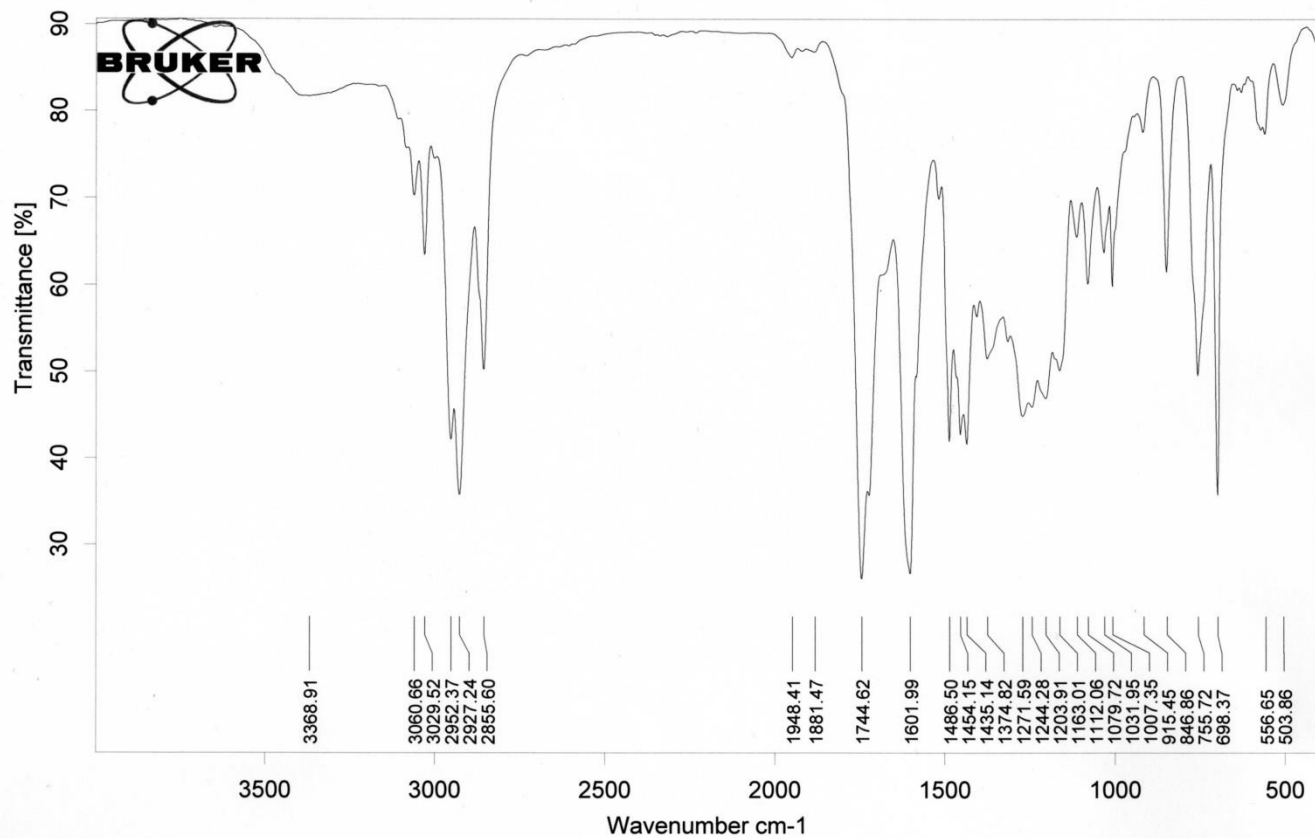

D:\temp-files\FTIR files\201501\20150121\MIR\_TR\_DTGS\_blank KBr\_chang705601.0.dpt

5h FT-IR

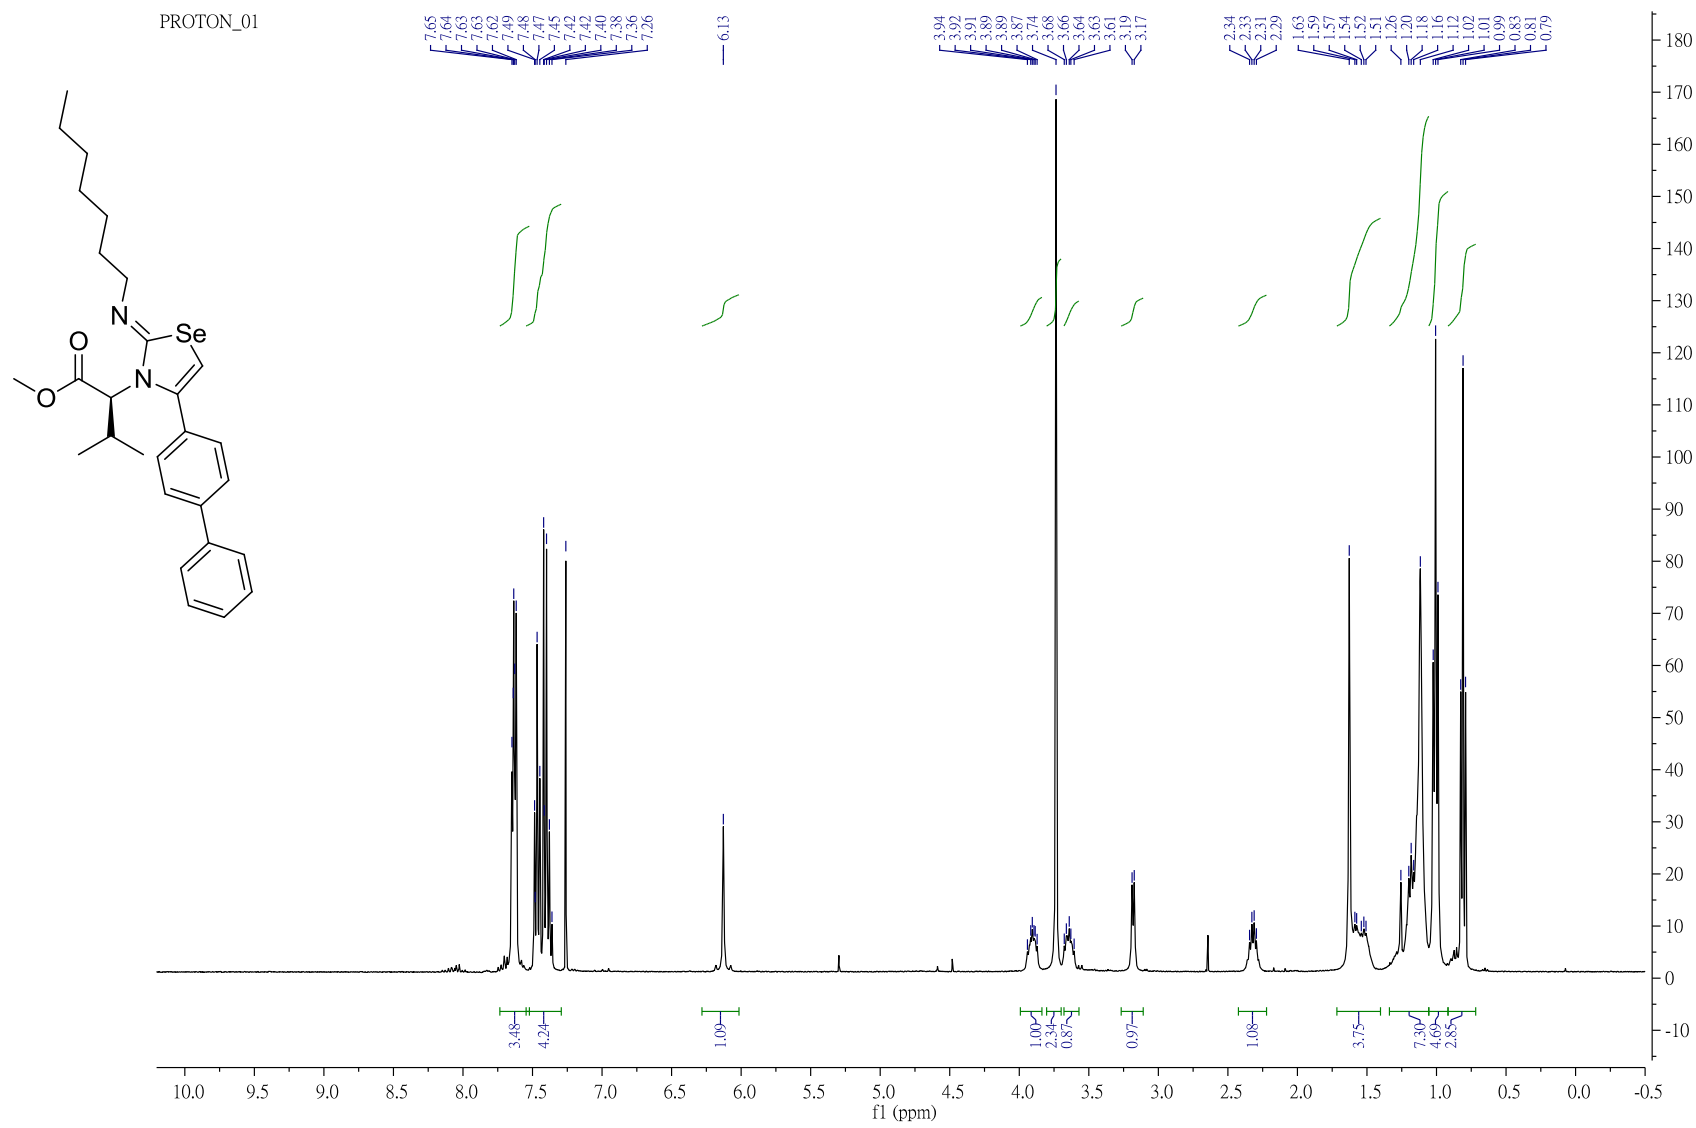

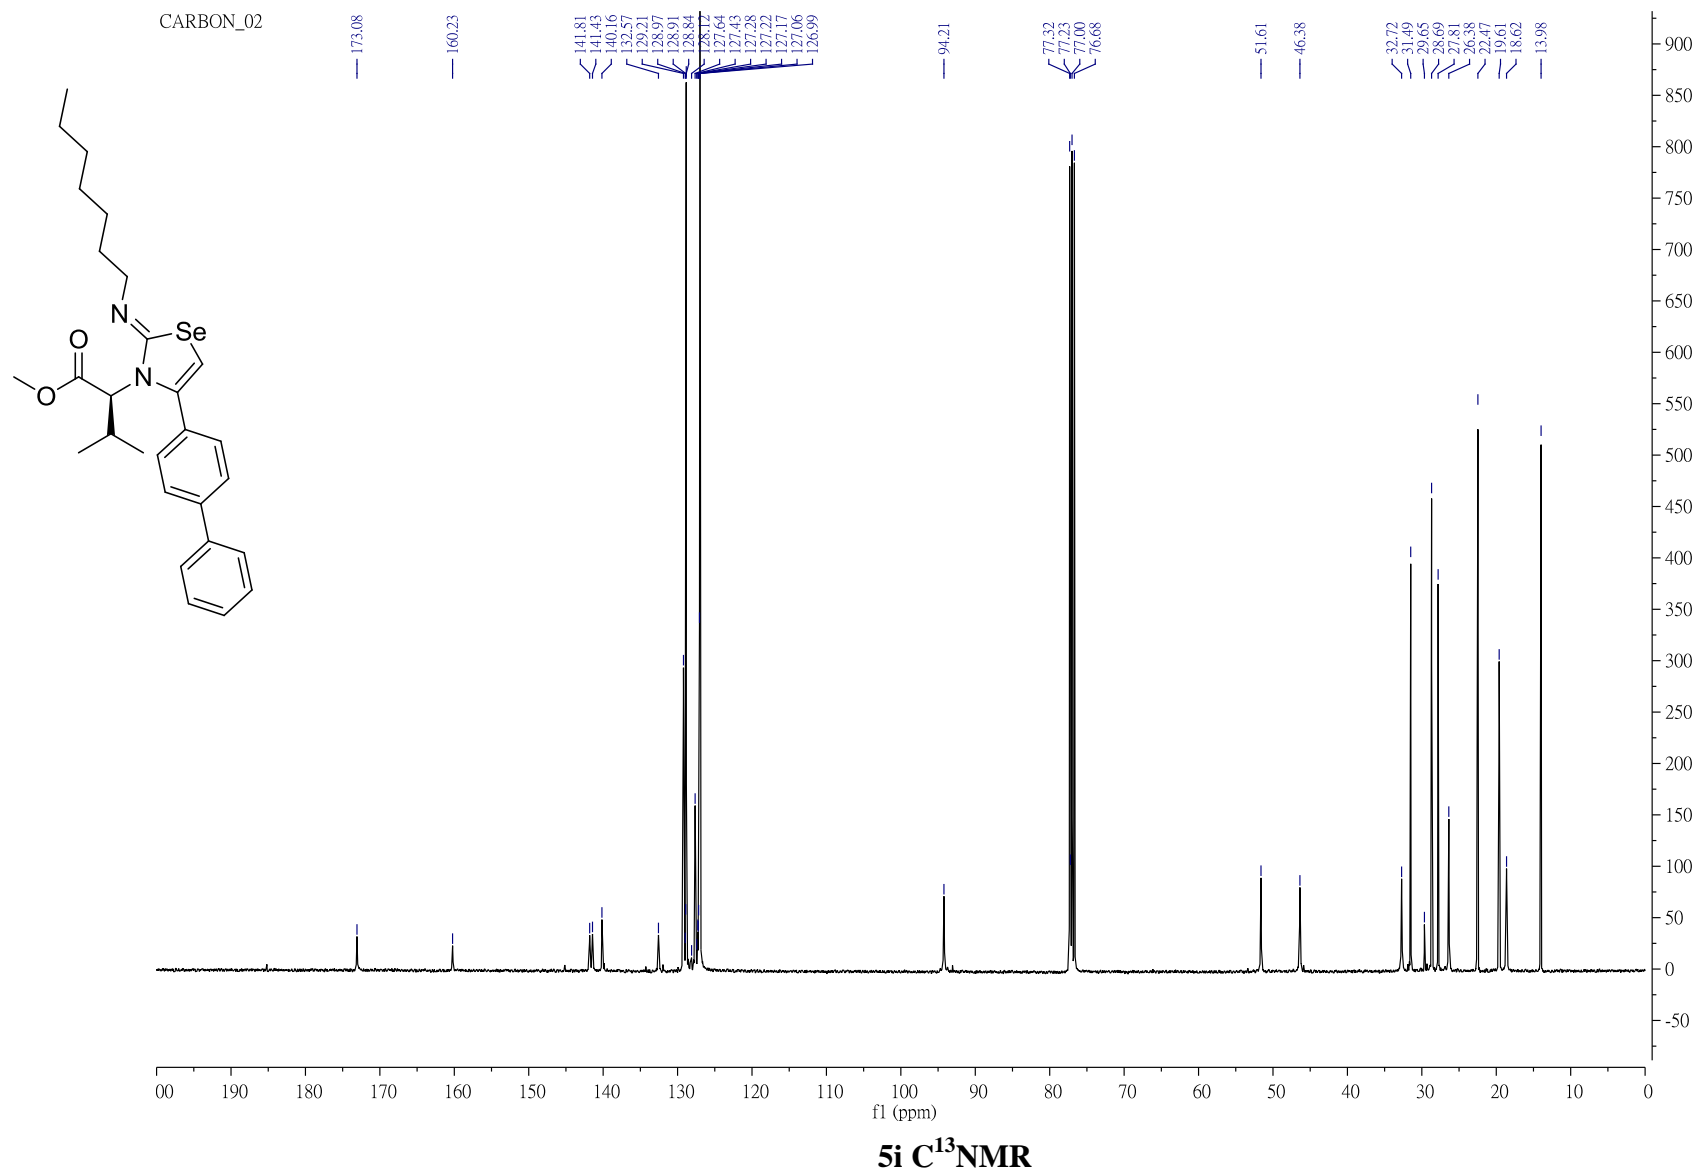

chang705501

20140613042 17 (1.164) Cn (Cen,2, 80.00, Ht); Sm (Mn, 2x0.75); Sb (3.60.00); Cm (16:18)

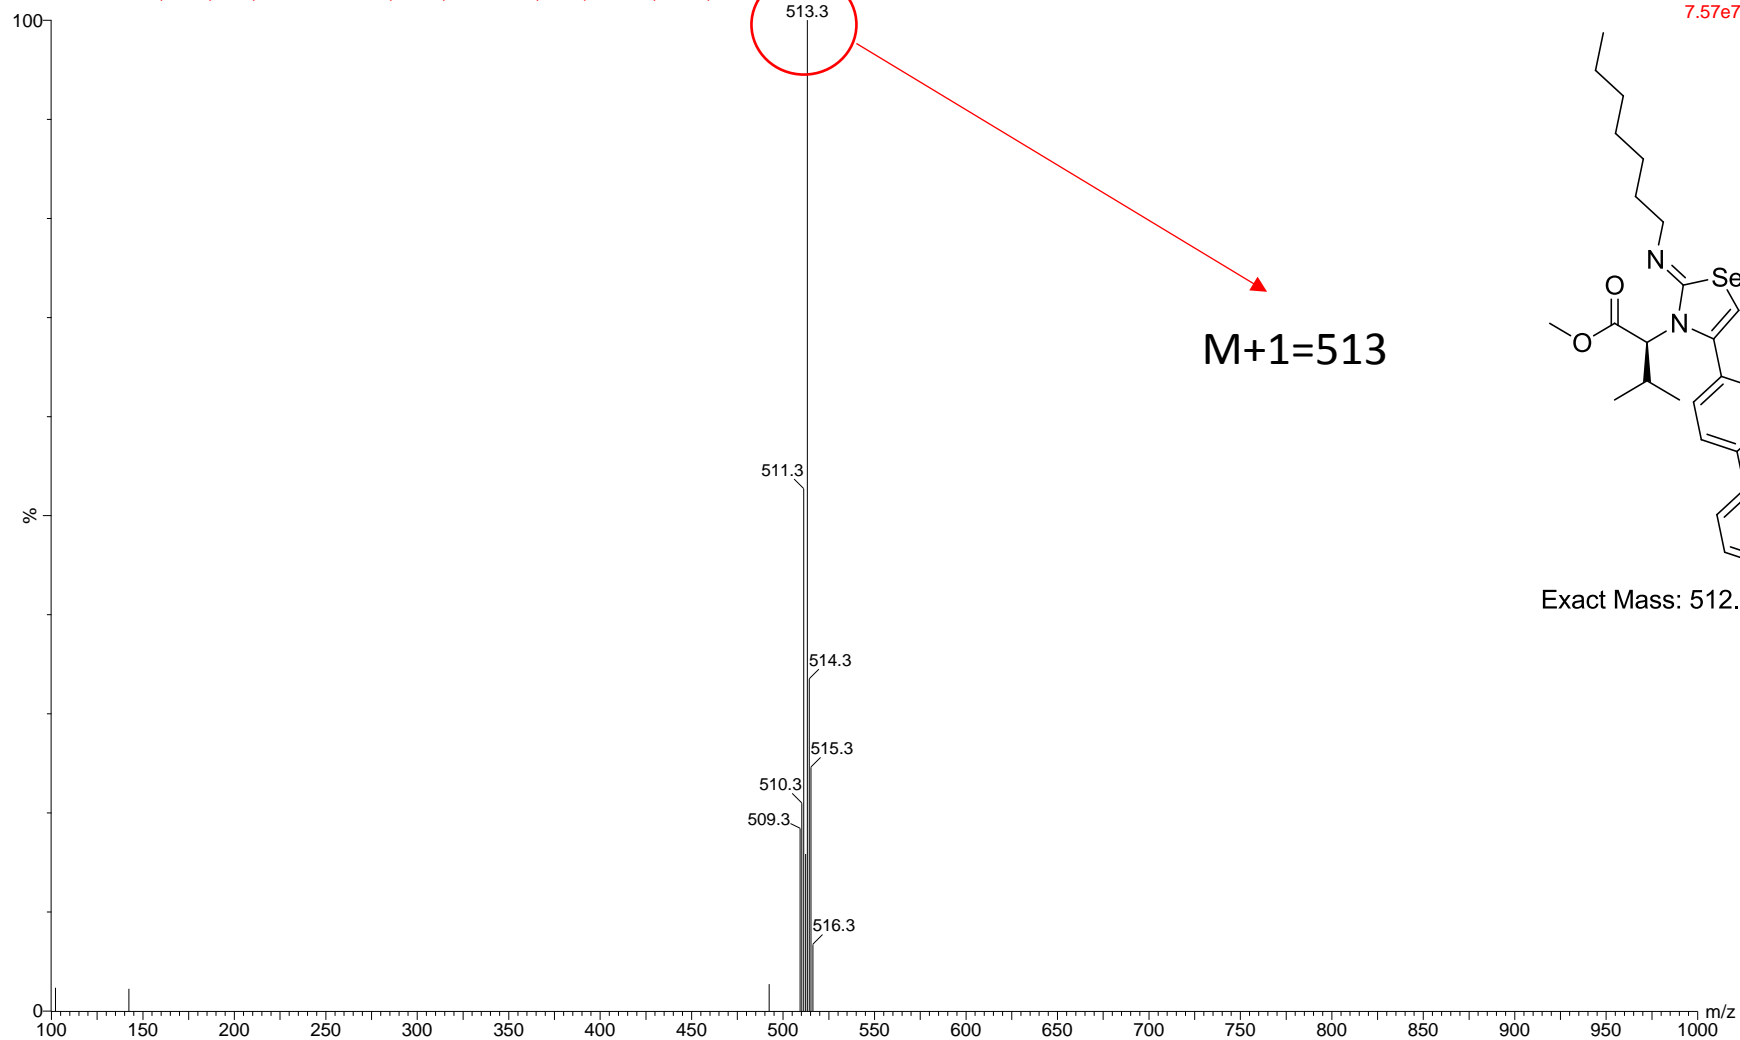

5i LR-MS

S103

# Display Report

## Analysis Info

Analysis Name D:\Data\NCTU SERVICE\Data\20140626\705501 511 ESI+\_GE1\_01\_2026.d  
Method Small molecule.m  
Sample Name 705501 511 ESI+  
Comment

Acquisition Date 6/26/2014 10:09:48 AM

Operator NCTU  
Instrument impact HD 1819696.00164

## Acquisition Parameter

|             |          |                      |          |                  |           |
|-------------|----------|----------------------|----------|------------------|-----------|
| Source Type | ESI      | Ion Polarity         | Positive | Set Nebulizer    | 1.0 Bar   |
| Focus       | Active   | Set Capillary        | 4500 V   | Set Dry Heater   | 200 °C    |
| Scan Begin  | 50 m/z   | Set End Plate Offset | -500 V   | Set Dry Gas      | 6.0 l/min |
| Scan End    | 1500 m/z | Set Charging Voltage | 2000 V   | Set Divert Valve | Waste     |
|             |          | Set Corona           | 0 nA     | Set APCI Heater  | 0 °C      |

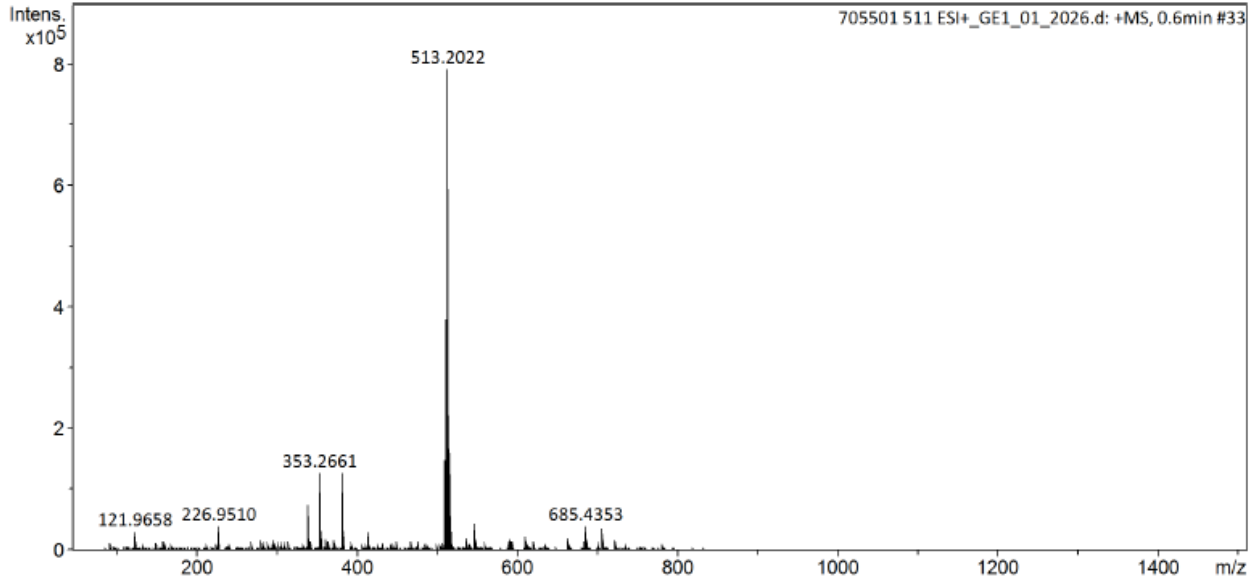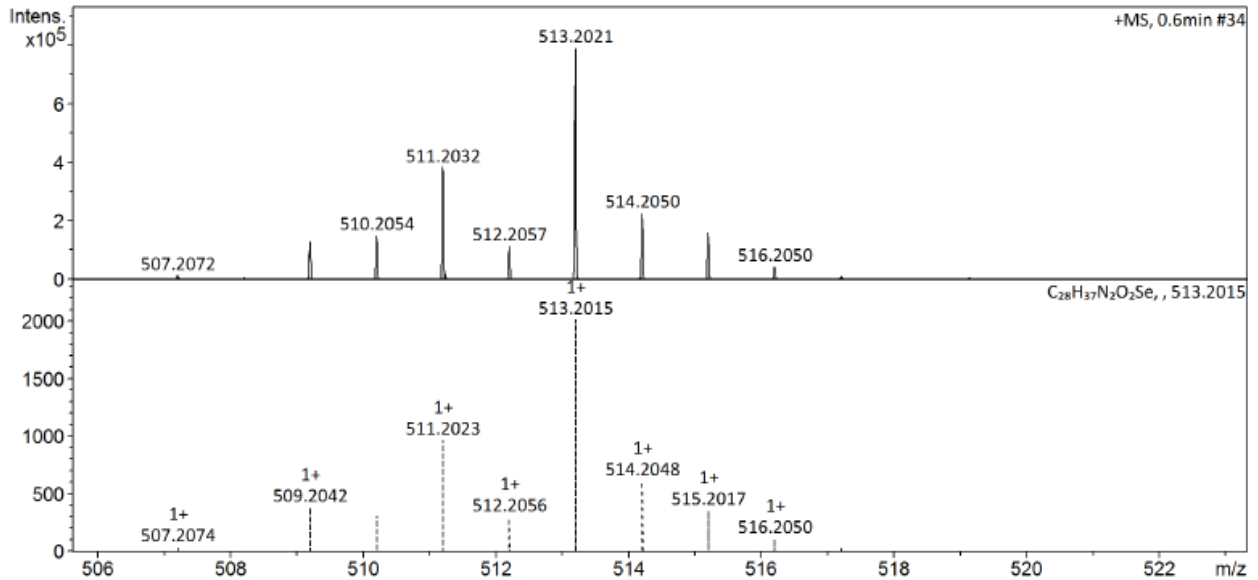

5i HR-MS



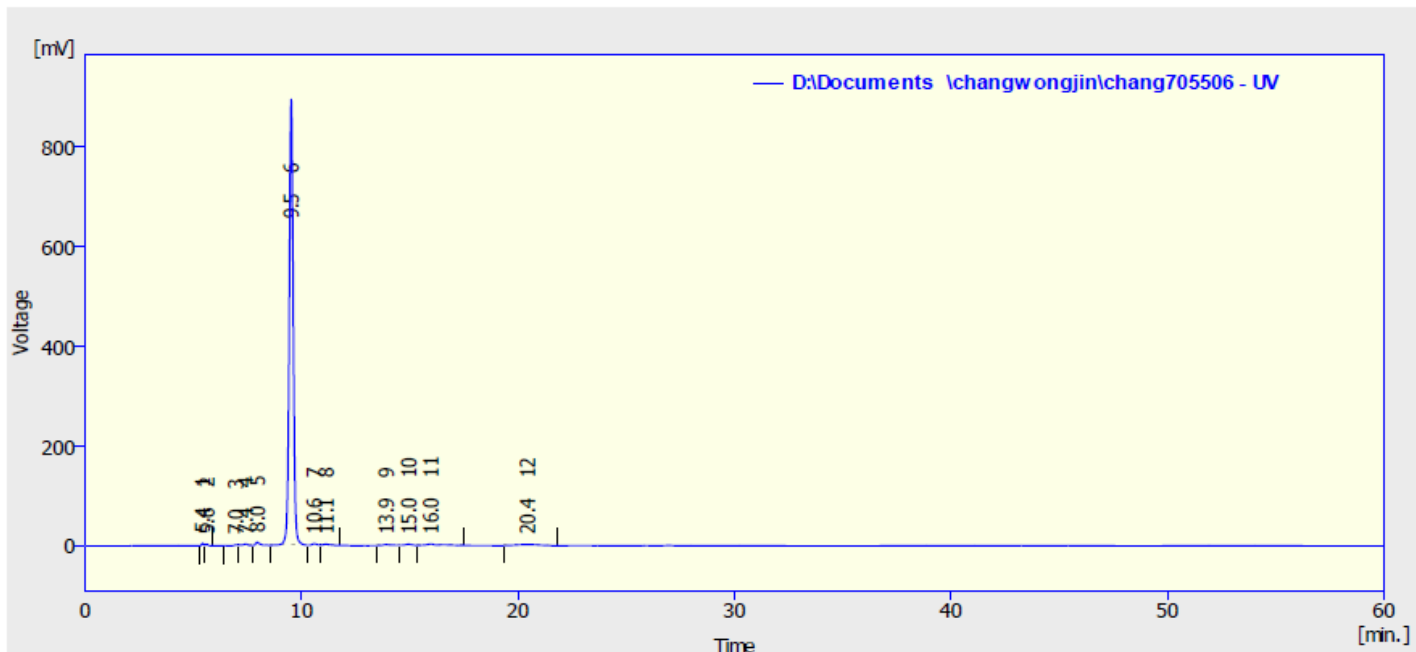

Result Table (Uncal - D:\Documents \changwongjin\chang705506 - UV)

|    | Reten. Time [min] | Area [mV.s] | Height [mV] | Area [%] | Height [%] |
|----|-------------------|-------------|-------------|----------|------------|
| 1  | 5.432             | 34.671      | 4.961       | 0.3      | 0.5        |
| 2  | 5.620             | 25.345      | 3.294       | 0.2      | 0.4        |
| 3  | 6.960             | 18.772      | 2.024       | 0.2      | 0.2        |
| 4  | 7.420             | 65.870      | 3.479       | 0.5      | 0.4        |
| 5  | 7.952             | 114.559     | 6.852       | 0.9      | 0.7        |
| 6  | 9.524             | 11636.346   | 894.311     | 93.4     | 96.1       |
| 7  | 10.596            | 67.423      | 3.571       | 0.5      | 0.4        |
| 8  | 11.124            | 65.766      | 2.577       | 0.5      | 0.3        |
| 9  | 13.900            | 59.594      | 1.964       | 0.5      | 0.2        |
| 10 | 14.952            | 65.942      | 2.530       | 0.5      | 0.3        |
| 11 | 15.976            | 131.323     | 3.033       | 1.1      | 0.3        |
| 12 | 20.428            | 167.693     | 2.367       | 1.3      | 0.3        |
|    | Total             | 12453.303   | 930.962     | 100.0    | 100.0      |

### 5i chiral HPLC

SAMPLE : \_\_\_\_\_  
 ID # : 009  
 LAMP  $\lambda$  : 589 nm  
 CONC : 0.01000 g/ml  
 CELL LG: 010 mm  
 TEMP CORR: +0.00037  
 INTERVAL: 1 min

SPECIFIC ROTATION  $[\alpha]$   
 COUNT  $[\alpha](^\circ)$  TEMP(°C)  
 01 - 54.4997 20.6  
 02 - 55.9997 20.6  
 03 - 54.4997 20.6  
 04 - 55.4997 20.6  
 05 - 56.4997 20.6  
 06 - 57.4997 20.6  
 07 - 58.9997 20.6  
 08 - 58.4997 20.6  
 09 - 59.4997 20.6  
 10 - 61.9997 20.6

MEAN = - 57.3497°  
 $\sigma(N-1)$  = 2.4158°  
 C. V. = - 4.2124%

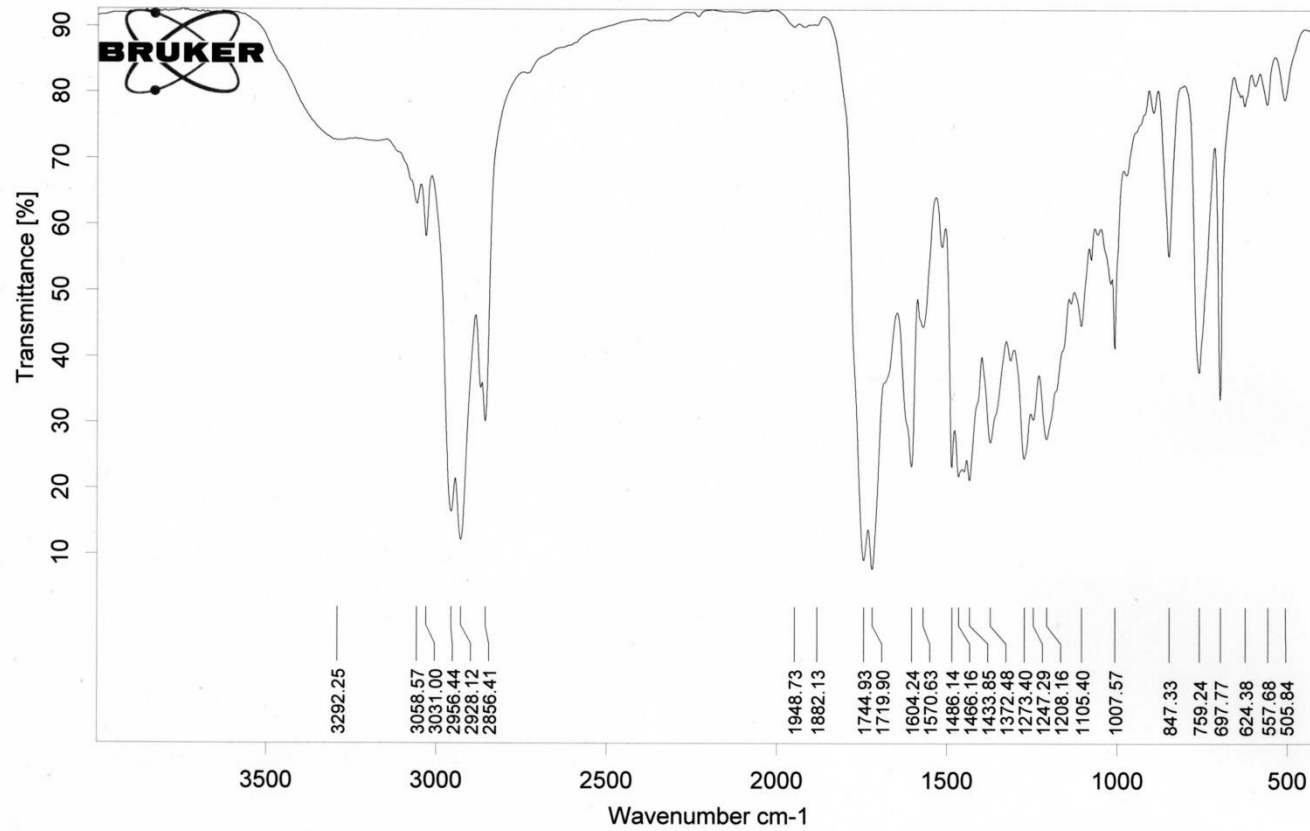

D:\temp-files\FTIR files\201501\20150121\MIR\_TR\_DTGS\_blank KBr\_chang705501.0.dpt

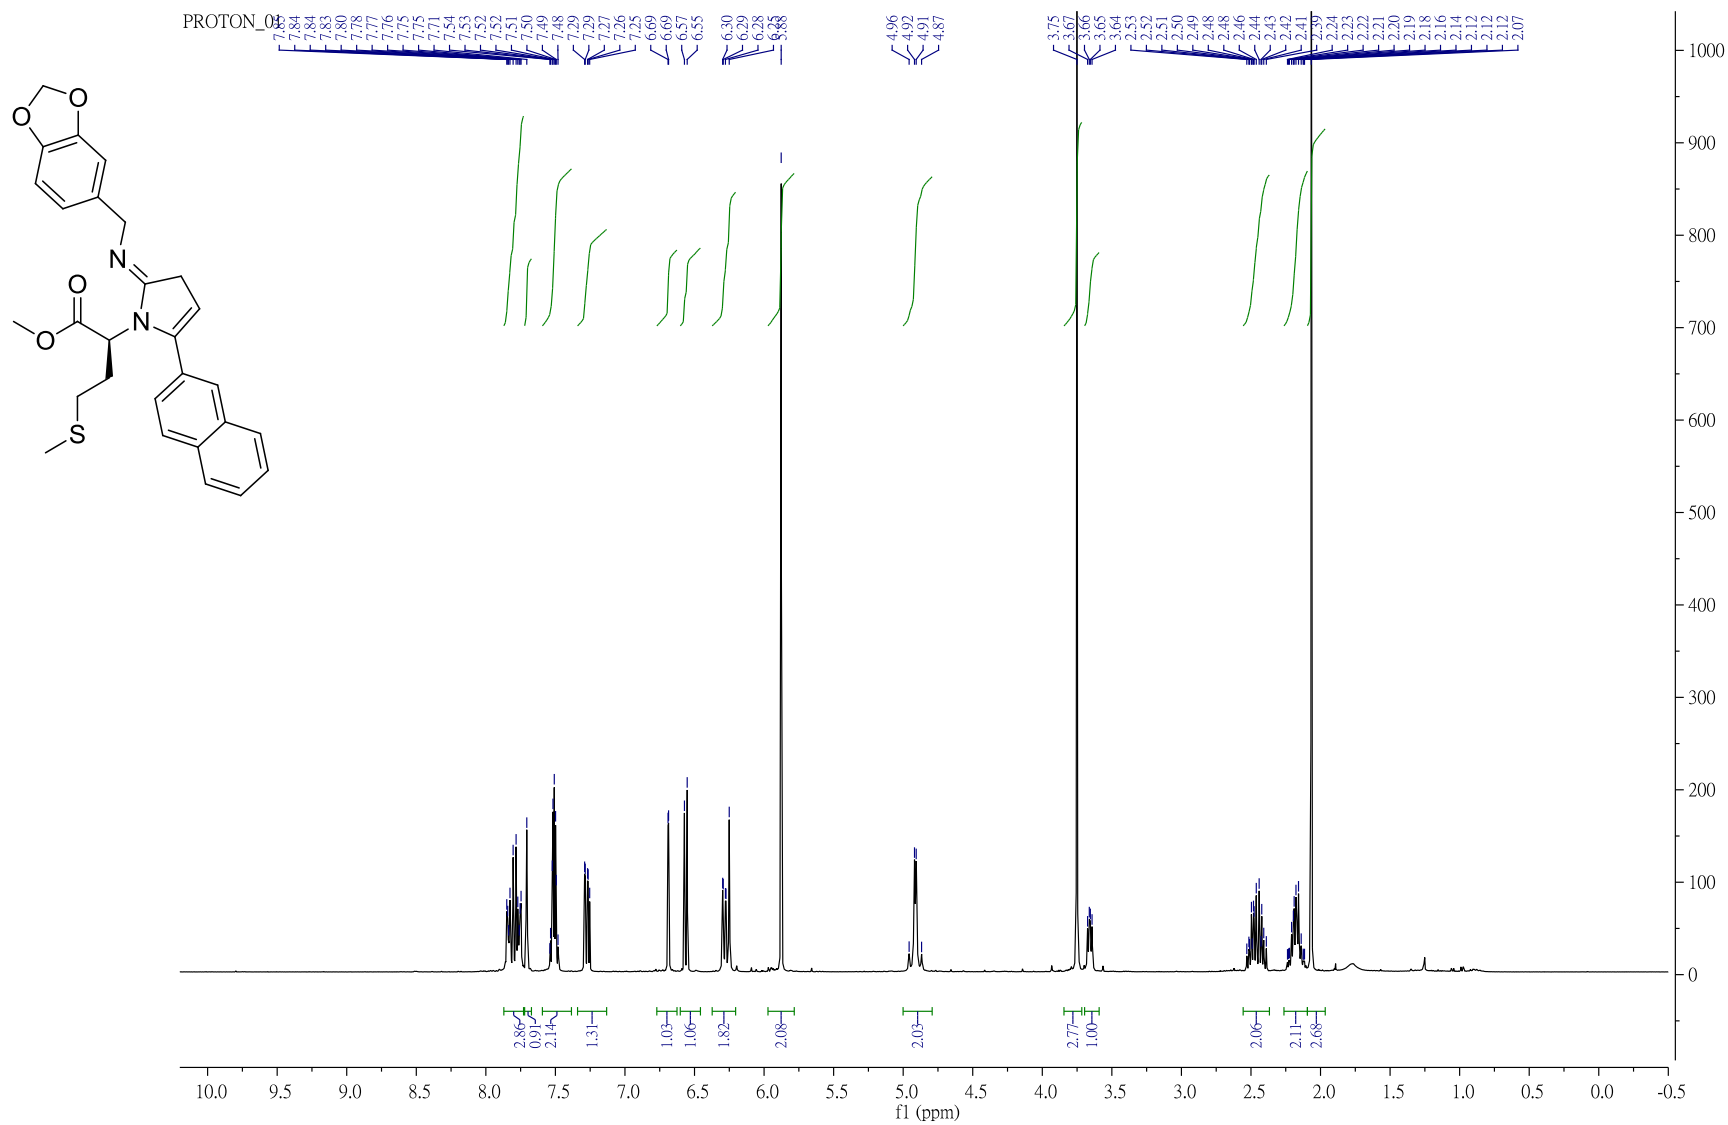

5j <sup>1</sup>H NMR

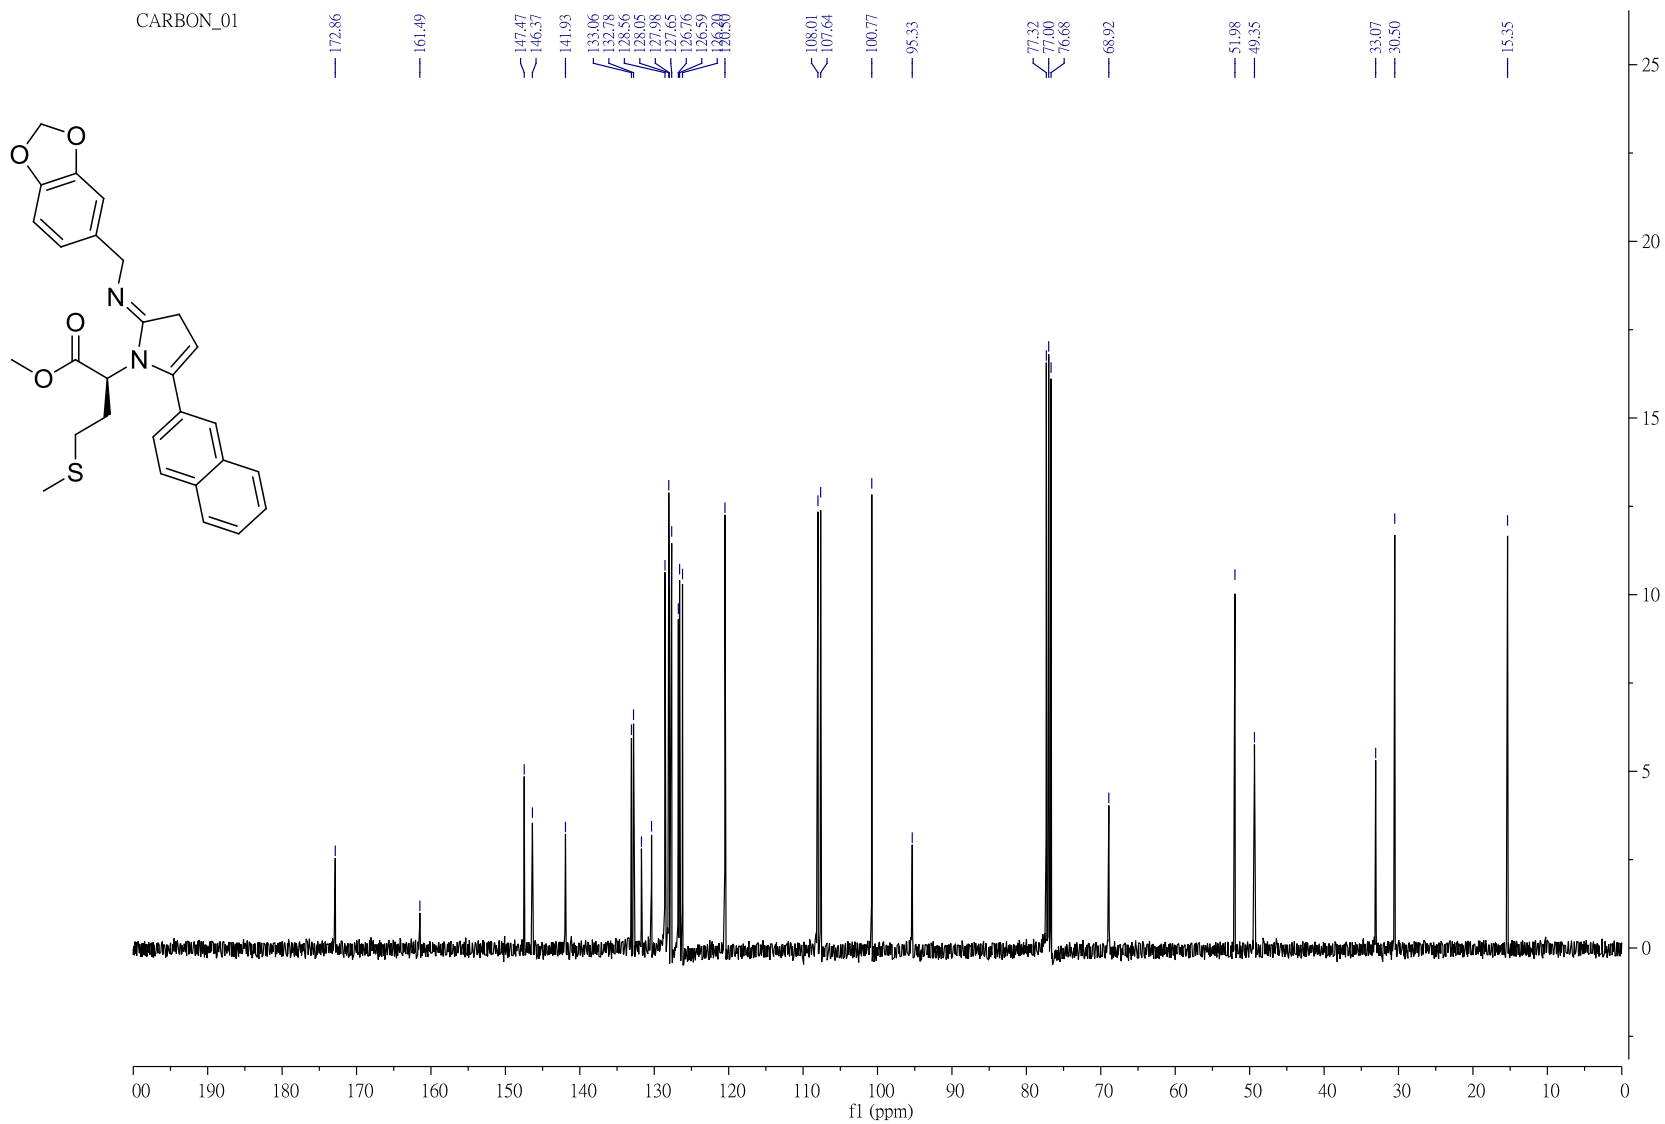

5j C<sup>13</sup>NMR

Scan 11 from c:\service\direct\20140411\2014-04-11\_chang703001.xms

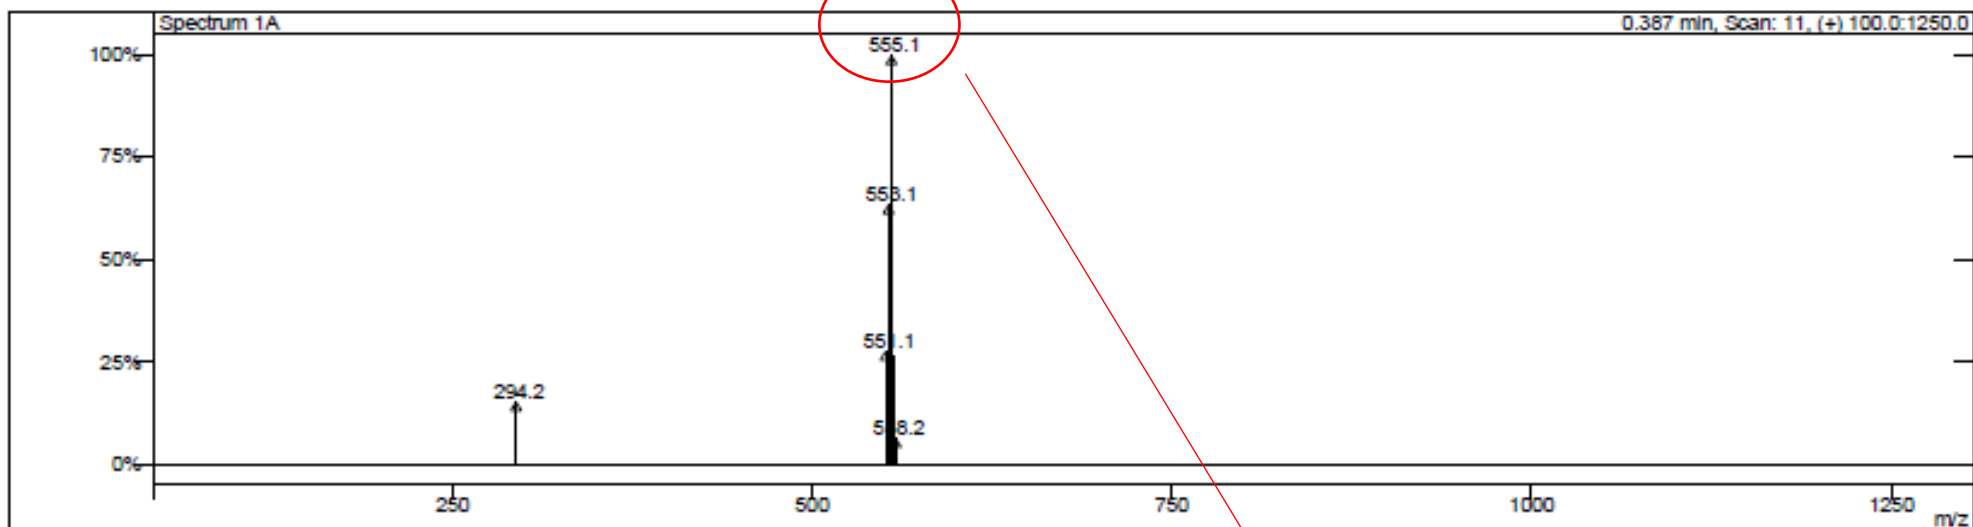

Spectrum from ...vice\direct\20140411\2014-04-11\_chang703001.xms  
Scan No: 11, Time: 0.387 minutes  
No averaging. Not background corrected.  
Name: HESI-FS-POS  
Comment: 0.387 min. Scan: 11 (+) 100.0:1250.0 RIC: 5066589784  
Pair Count: 9 MW: 0 Formula: None  
CAS No: None Acquired Range: 100.0 - 1250.0 m/z  
CAS No: None Acquired Range: 100.0 - 1250.0 m/z

M+1=555

5j LR-MS

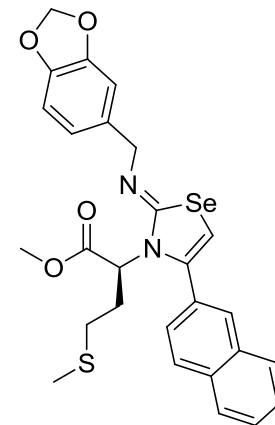

Exact Mass: 554.0778

# Display Report

## Analysis Info

Analysis Name D:\Data\NCTU SERVICE\Data\20140626\703001 553 ESI+\_GD7\_01\_2024.d  
Method Small molecule.m  
Sample Name 703001 553 ESI+  
Comment

Acquisition Date 6/26/2014 10:01:10 AM  
Operator NCTU  
Instrument impact HD 1819696.00164

## Acquisition Parameter

|             |          |                      |          |                  |           |
|-------------|----------|----------------------|----------|------------------|-----------|
| Source Type | ESI      | Ion Polarity         | Positive | Set Nebulizer    | 1.0 Bar   |
| Focus       | Active   | Set Capillary        | 4500 V   | Set Dry Heater   | 200 °C    |
| Scan Begin  | 50 m/z   | Set End Plate Offset | -500 V   | Set Dry Gas      | 6.0 l/min |
| Scan End    | 1500 m/z | Set Charging Voltage | 2000 V   | Set Divert Valve | Waste     |
|             |          | Set Corona           | 0 nA     | Set APCI Heater  | 0 °C      |

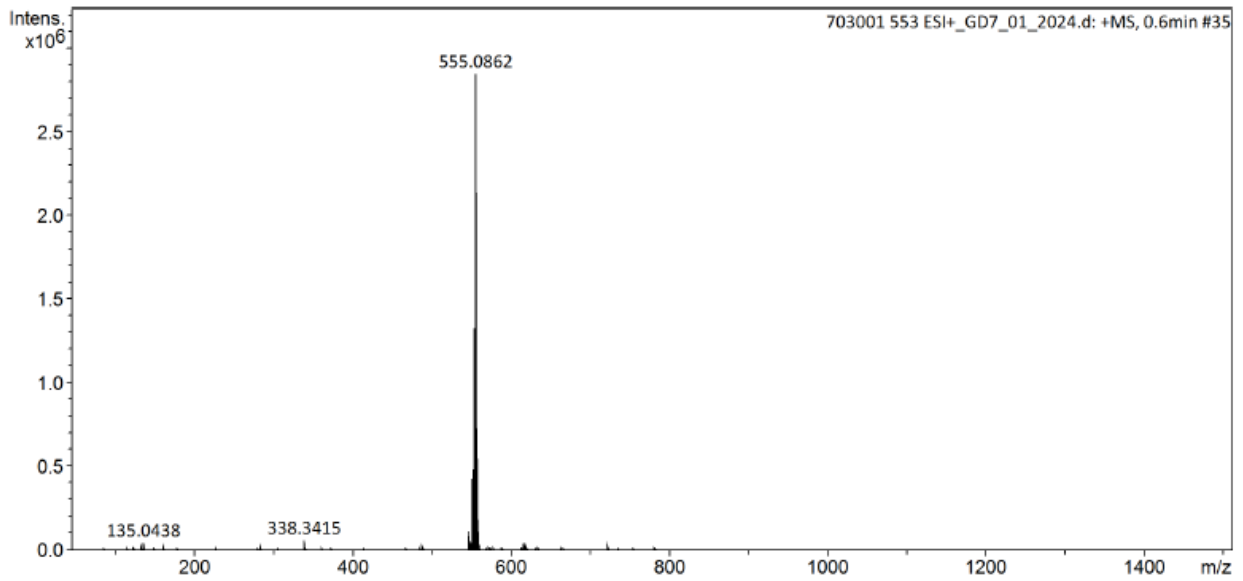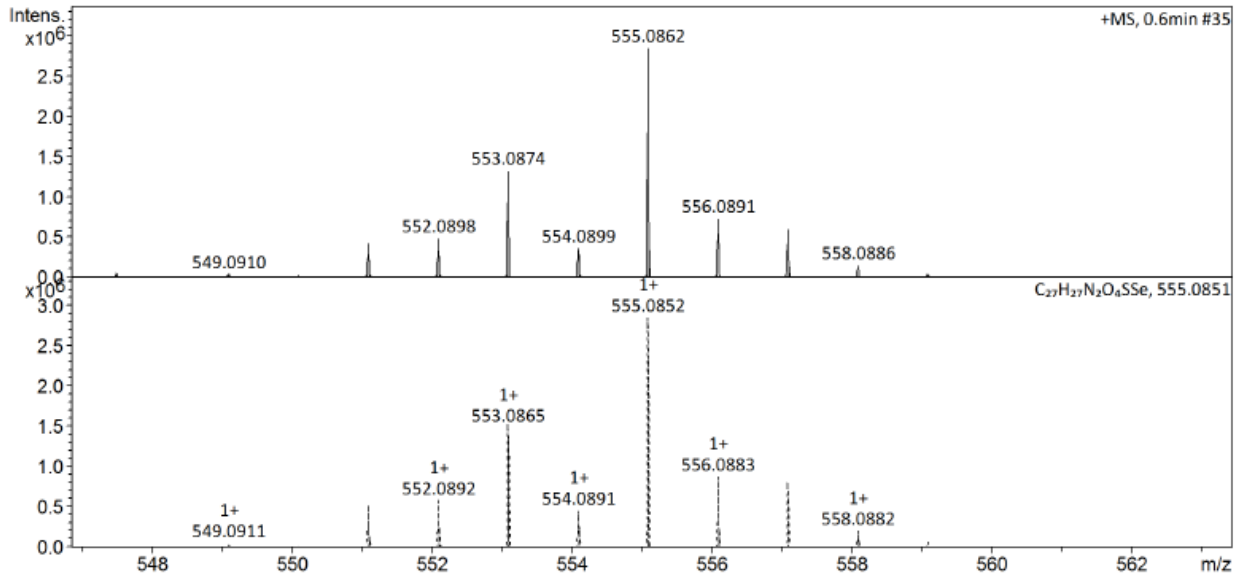

5j HR-MS

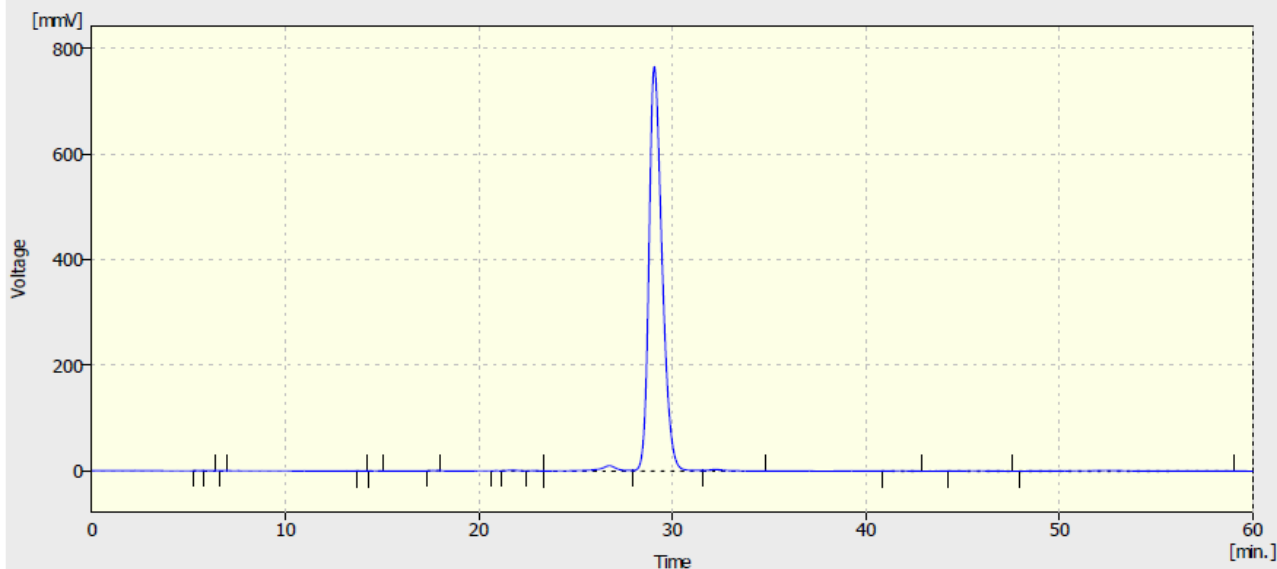

Result Table (Uncal - D: \Documents [changwongjin]chang703004)

|    | Reten. Time [min] | Area [mV.s] | Height [mV] | Area [%] | Height [%] | W05 [min] |
|----|-------------------|-------------|-------------|----------|------------|-----------|
| 1  | 5.636             | 4.736       | 0.292       | 0.0      | 0.0        | 0.26      |
| 2  | 5.912             | 8.531       | 0.647       | 0.0      | 0.1        | 0.15      |
| 3  | 6.800             | 2.411       | 0.229       | 0.0      | 0.0        | 0.17      |
| 4  | 13.904            | 4.384       | 0.288       | 0.0      | 0.0        | 0.26      |
| 5  | 14.676            | 11.532      | 0.595       | 0.0      | 0.1        | 0.32      |
| 6  | 17.676            | 10.448      | 0.605       | 0.0      | 0.1        | 0.31      |
| 7  | 20.892            | 5.665       | 0.267       | 0.0      | 0.0        | 0.36      |
| 8  | 21.696            | 57.932      | 1.500       | 0.2      | 0.2        | 0.62      |
| 9  | 22.848            | 17.078      | 0.686       | 0.0      | 0.1        | 0.40      |
| 10 | 26.744            | 657.107     | 10.082      | 1.8      | 1.3        | 0.75      |
| 11 | 29.064            | 36021.664   | 765.503     | 96.4     | 97.3       | 0.72      |
| 12 | 32.232            | 212.306     | 2.950       | 0.6      | 0.4        | 1.16      |
| 13 | 41.828            | 33.622      | 0.704       | 0.1      | 0.1        | 0.76      |
| 14 | 45.672            | 53.936      | 0.658       | 0.1      | 0.1        | 1.28      |

Result Table (Uncal - D: \Documents [changwongjin]chang703004)

|    | Reten. Time [min] | Area [mV.s] | Height [mV] | Area [%] | Height [%] | W05 [min] |
|----|-------------------|-------------|-------------|----------|------------|-----------|
| 15 | 52.436            | 253.251     | 1.391       | 0.7      | 0.2        | 1.64      |
|    | Total             | 37354.603   | 786.397     | 100.0    | 100.0      |           |

## 5j chiral HPLC

SAMPLE : -----  
 ID # : 001  
 LAMP λ : 589 nm  
 CONC : 0.01000 g/ml  
 CELL LG: 010 mm  
 TEMP CORR: +0.00037  
 INTERVAL: 1 min

SPECIFIC ROTATION [α]  
 COUNT [α] (°) TEMP (°C)  
 01 - 71.4997 20.8  
 02 - 71.4997 20.8  
 03 - 71.4997 20.8  
 04 - 72.4997 20.8  
 05 - 75.9997 20.8  
 06 - 76.9997 20.8  
 07 - 79.4997 20.8  
 08 - 83.9997 20.8  
 09 - 84.4997 20.8  
 10 - 85.9997 20.7

MEAN = - 77.3997°  
 σ(N-1) = 5.8013°  
 C. V. = - 7.4953%

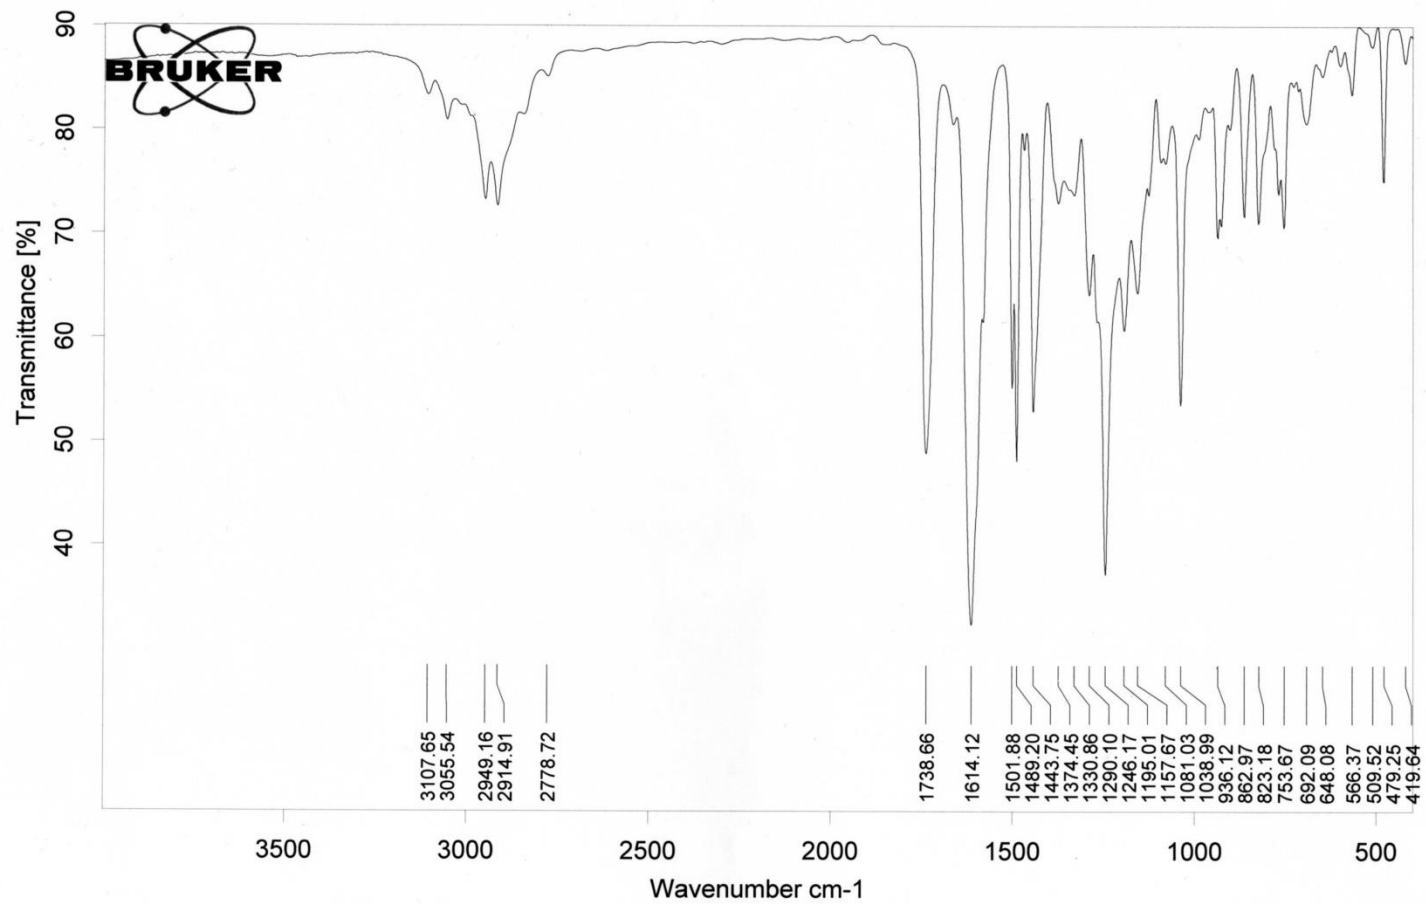

D:\temp-files\FTIR files\201502\20150210\MIR\_TR\_DTGS\_chang703001.1.dpt



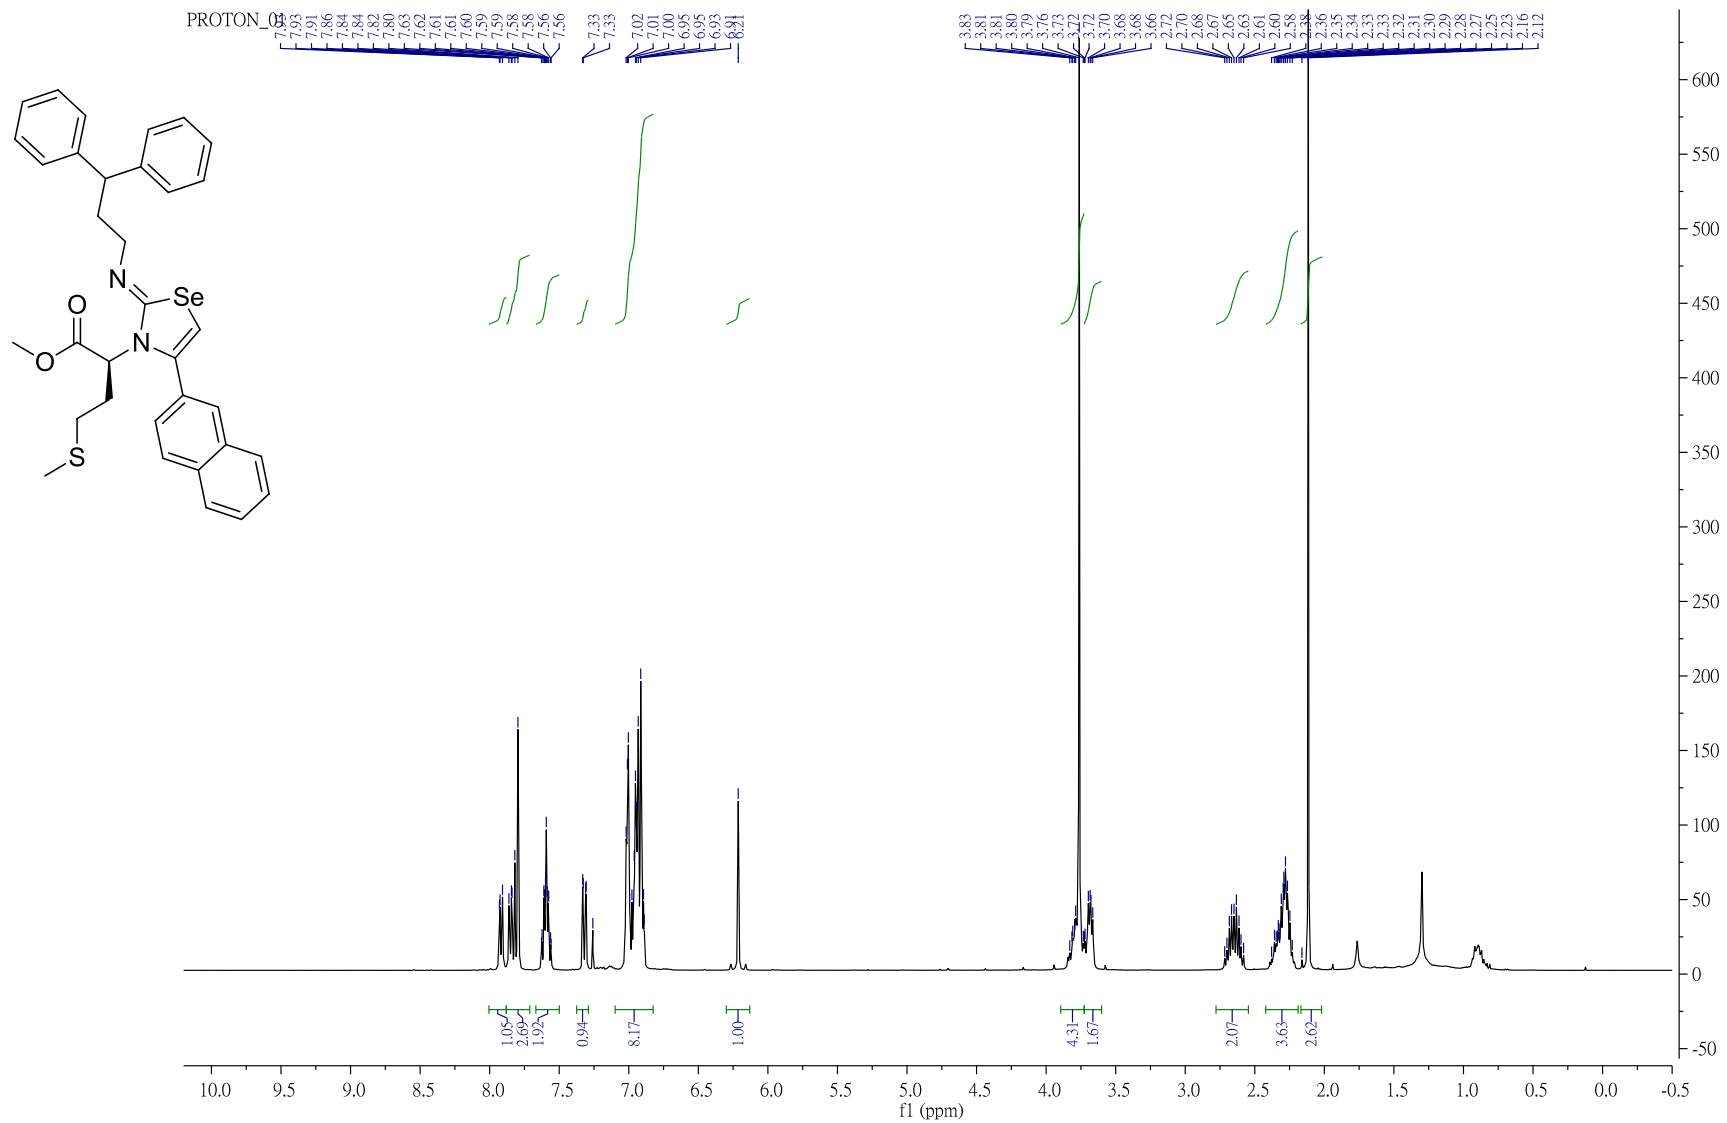

**5k  $^1\text{H}$ -NMR**

S113

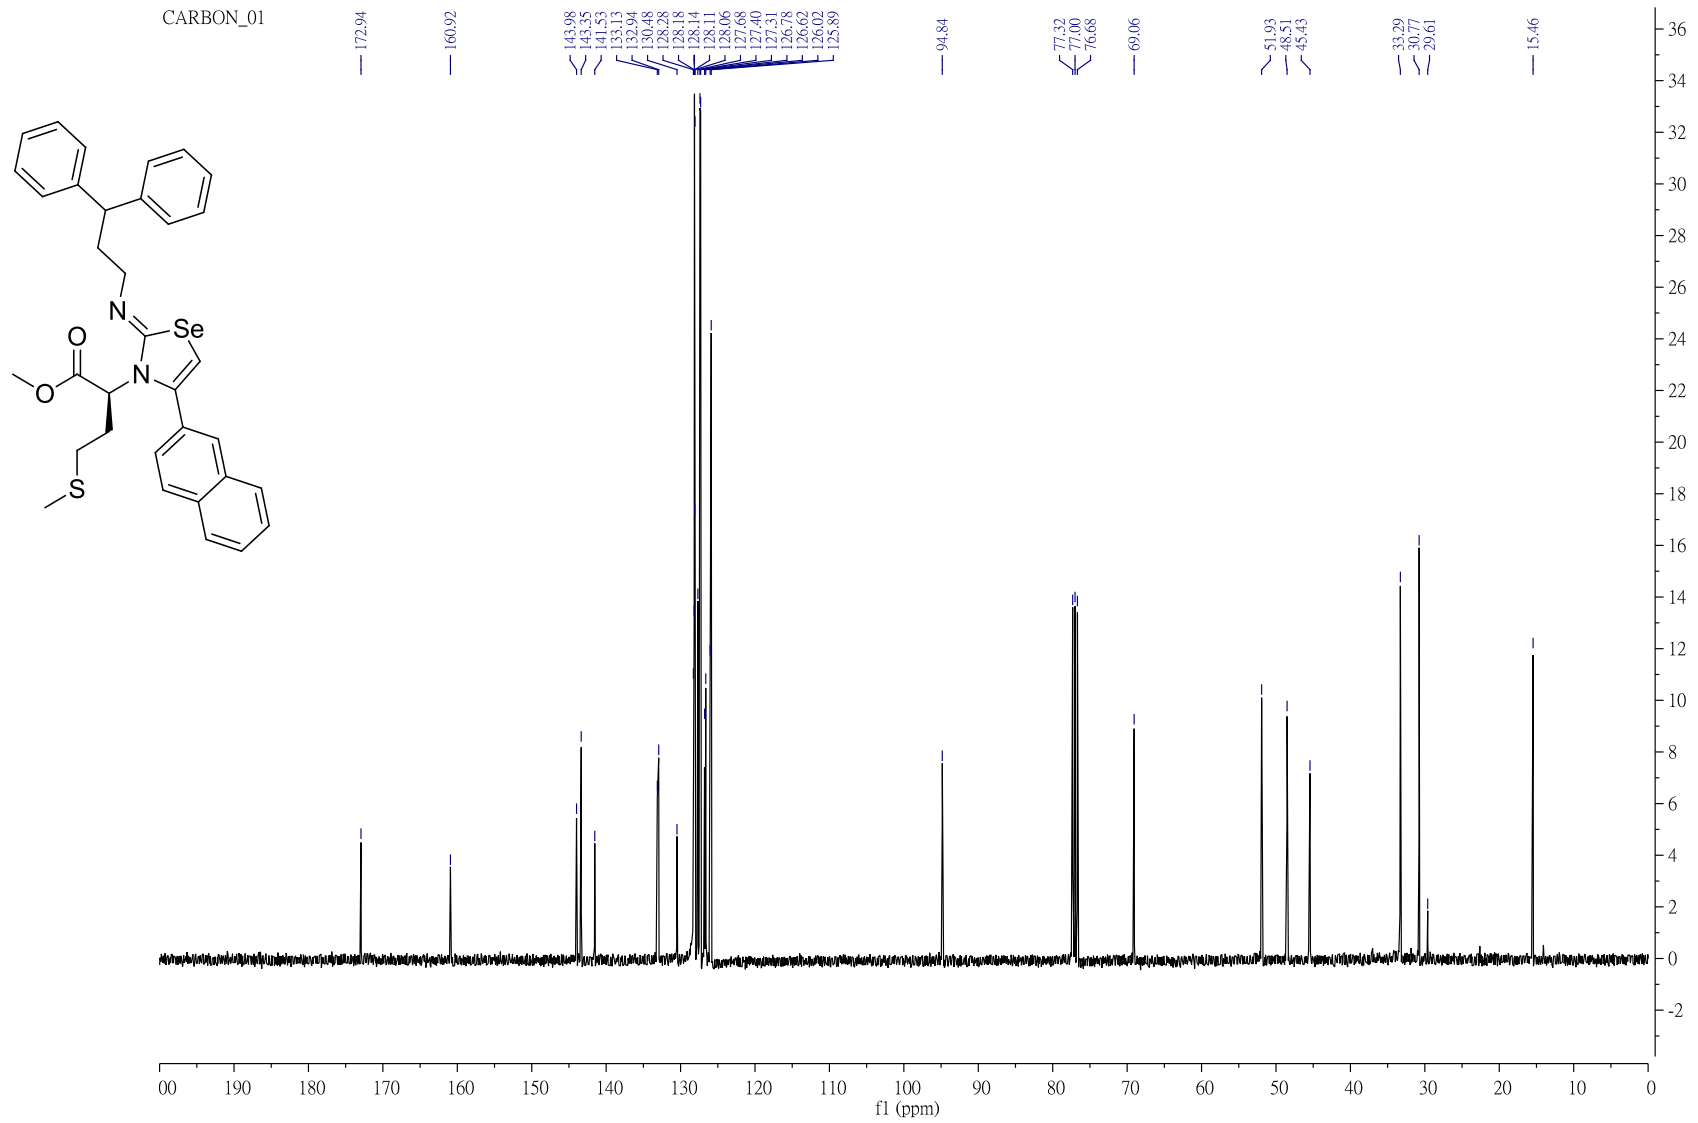

5k C<sup>13</sup>-NMR

S114

chang702501

2014030418 28 (1.918) Cn (Cen,2, 80.00, Ht); Sm (Mn, 2x0.75); Sb (3,40.00); Cm (26:31-12:24x3.000)

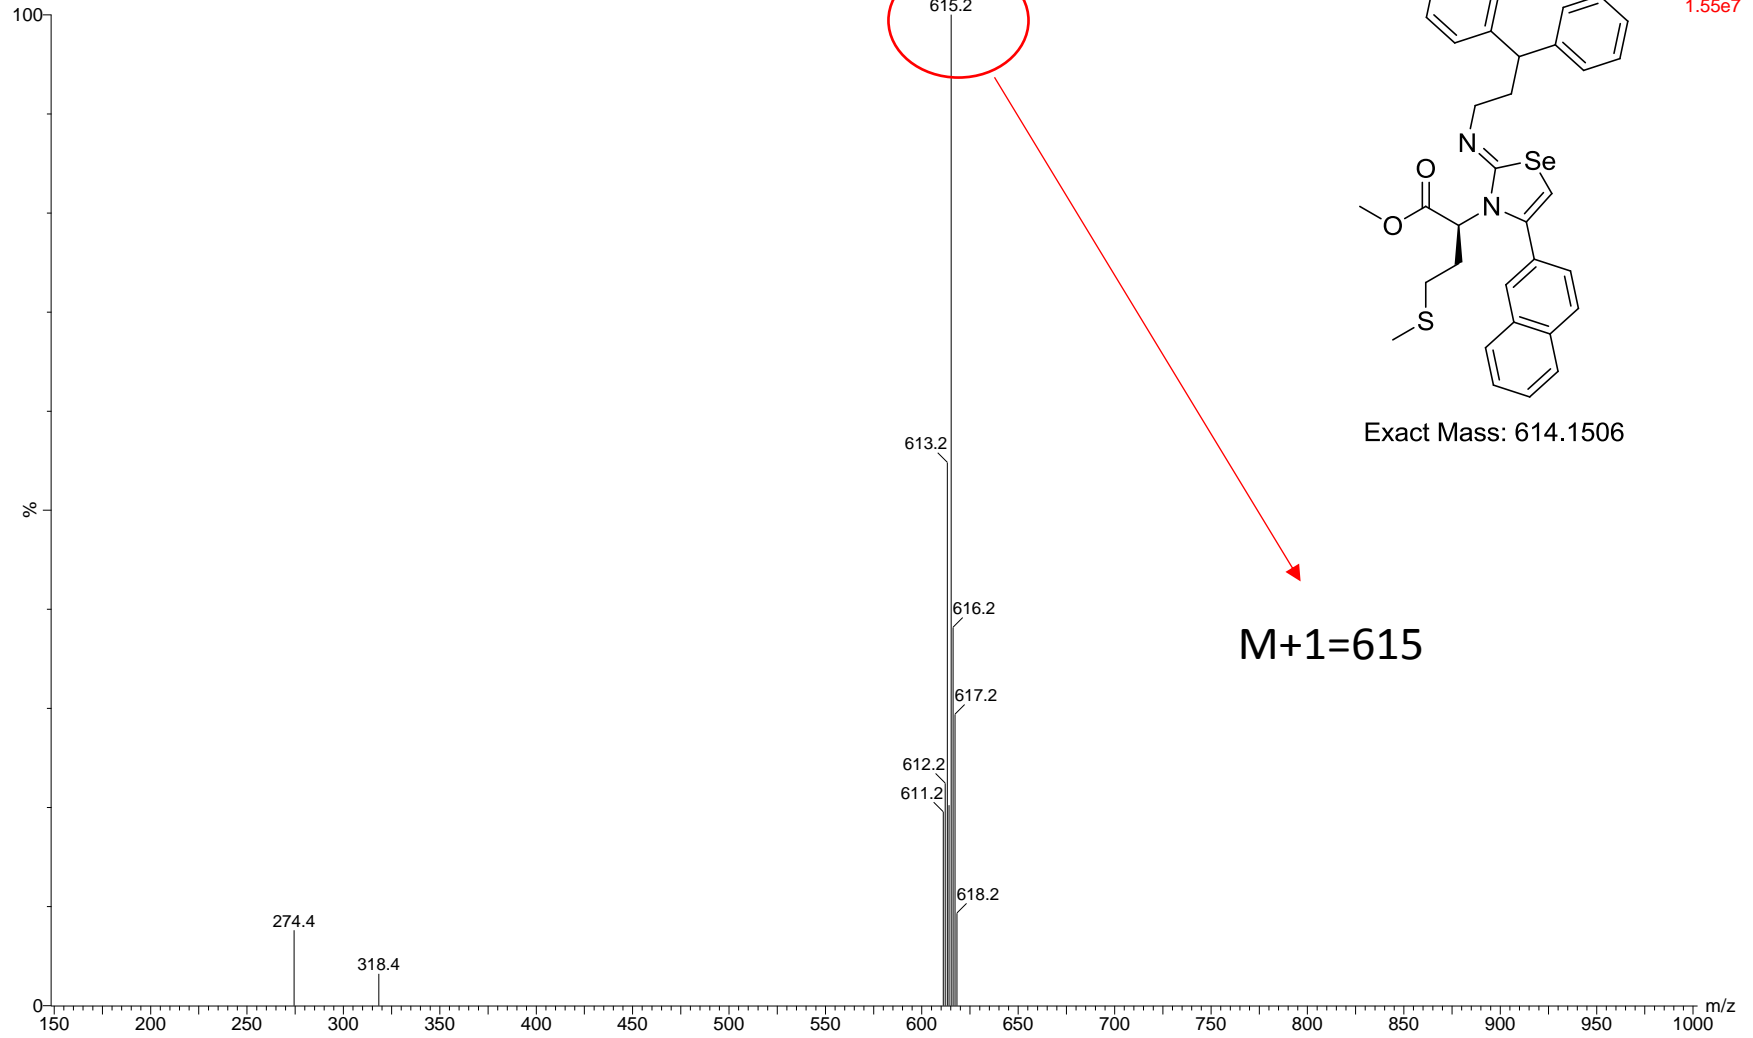

5k LR-MS

S115

# Display Report

## Analysis Info

Analysis Name F:\Q-TOF\20150115\chang702501 ESI+\_GA1\_01\_4508.d  
Method Small molecule.m  
Sample Name chang702501 ESI+  
Comment

Acquisition Date 1/15/2015 4:37:29 PM

Operator NCTU  
Instrument impact HD 1819696.00164

## Acquisition Parameter

|             |          |                      |          |                  |           |
|-------------|----------|----------------------|----------|------------------|-----------|
| Source Type | ESI      | Ion Polarity         | Positive | Set Nebulizer    | 1.0 Bar   |
| Focus       | Active   | Set Capillary        | 4500 V   | Set Dry Heater   | 200 °C    |
| Scan Begin  | 50 m/z   | Set End Plate Offset | -500 V   | Set Dry Gas      | 6.0 l/min |
| Scan End    | 1500 m/z | Set Charging Voltage | 2000 V   | Set Divert Valve | Waste     |
|             |          | Set Corona           | 0 nA     | Set APCI Heater  | 0 °C      |

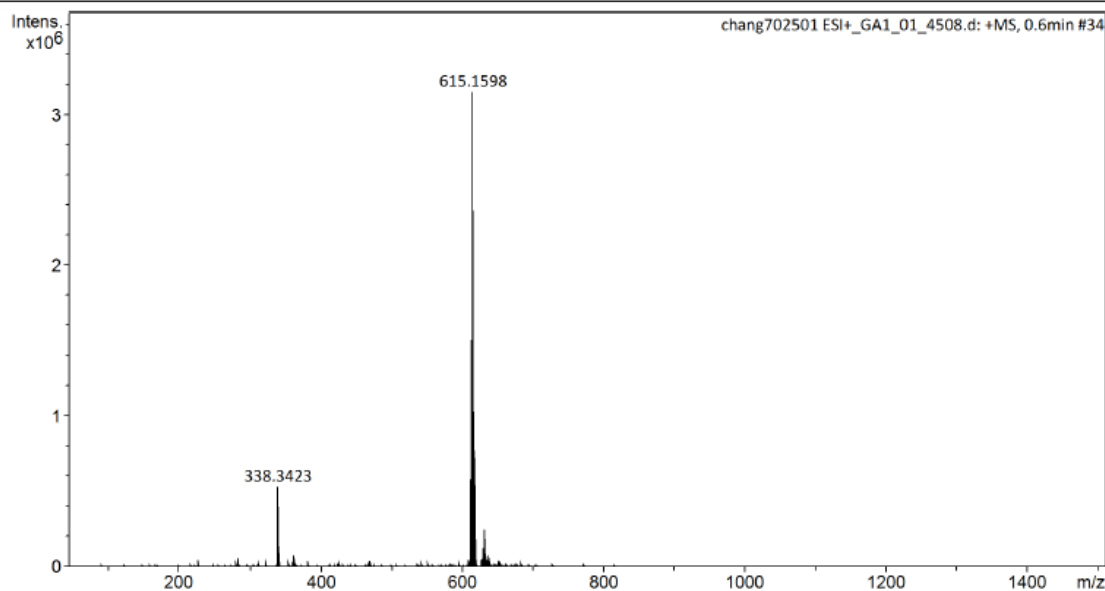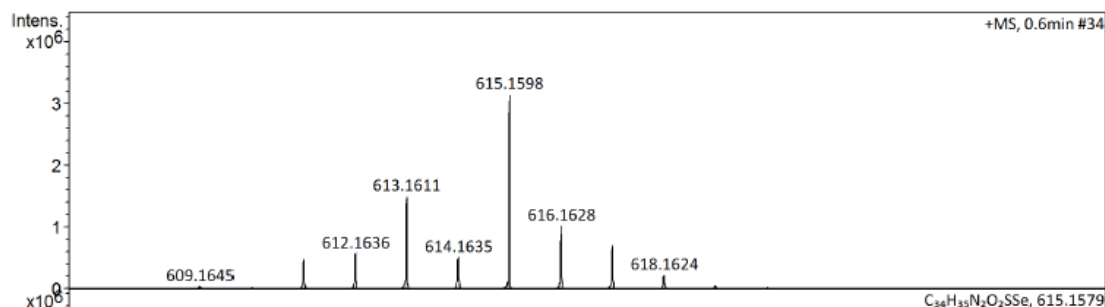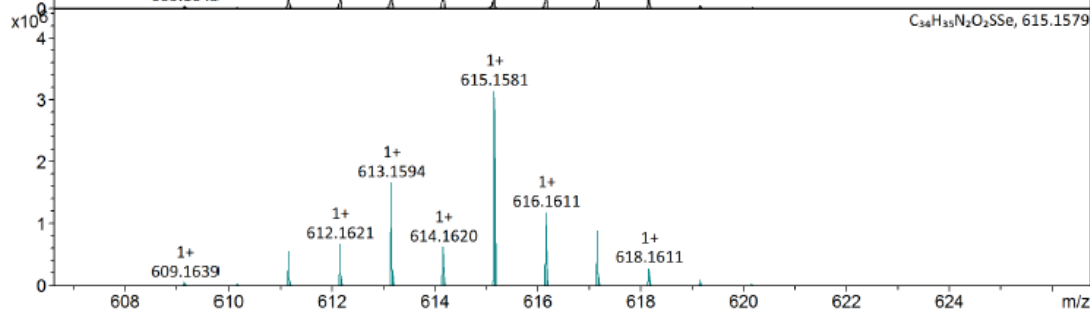

5k HR-MS

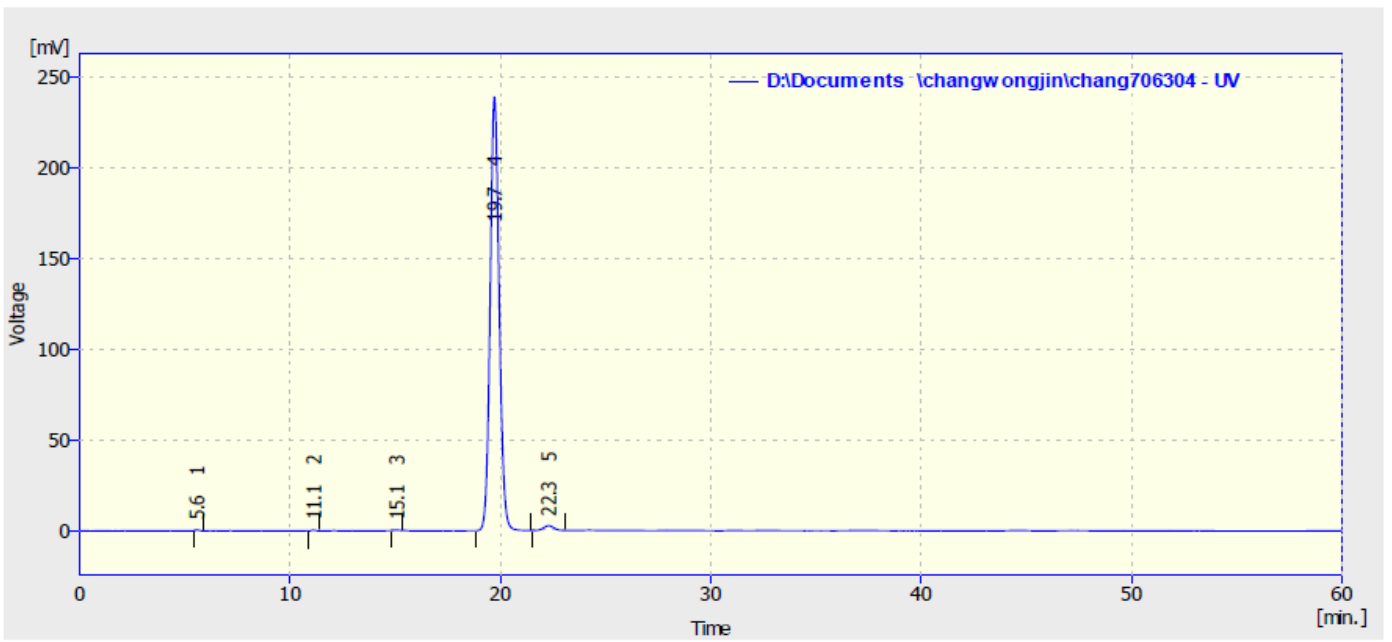

Result Table (Uncal - D:\Documents \changwongjin\chang706304 - UV)

|   | Reten. Time [min] | Area [mV.s] | Height [mV] | Area [%] | Height [%] |
|---|-------------------|-------------|-------------|----------|------------|
| 1 | 5.580             | 4.604       | 0.485       | 0.1      | 0.2        |
| 2 | 11.120            | 4.719       | 0.396       | 0.1      | 0.2        |
| 3 | 15.064            | 4.019       | 0.251       | 0.1      | 0.1        |
| 4 | 19.716            | 7114.447    | 238.552     | 98.6     | 98.4       |
| 5 | 22.284            | 91.103      | 2.674       | 1.3      | 1.1        |
|   | Total             | 7218.892    | 242.357     | 100.0    | 100.0      |

### 5k chiral HPLC

SAMPLE : \_\_\_\_\_  
 ID # : 019  
 LAMP  $\lambda$  : 589 nm  
 CONC : 0.01000 g/ml  
 CELL LG: 010 mm  
 TEMP CORR: +0.00037  
 INTERVAL: 1 min

SPECIFIC ROTATION  $[\alpha]$   
 COUNT  $[\alpha](^\circ)$  TEMP( $^\circ\text{C}$ )

|    |           |      |
|----|-----------|------|
| 01 | -682.0000 | 19.9 |
| 02 | -685.5000 | 19.9 |
| 03 | -687.0000 | 19.9 |
| 04 | -688.0000 | 19.9 |
| 05 | -687.0000 | 19.9 |
| 06 | -692.5000 | 19.9 |
| 07 | -693.0000 | 19.9 |
| 08 | -692.0000 | 19.9 |
| 09 | -693.0000 | 19.9 |
| 10 | -695.0000 | 19.9 |

MEAN = -689.5000°  
 $\sigma(N-1)$  = 4.1766°  
 C. V. = - 0.60575%

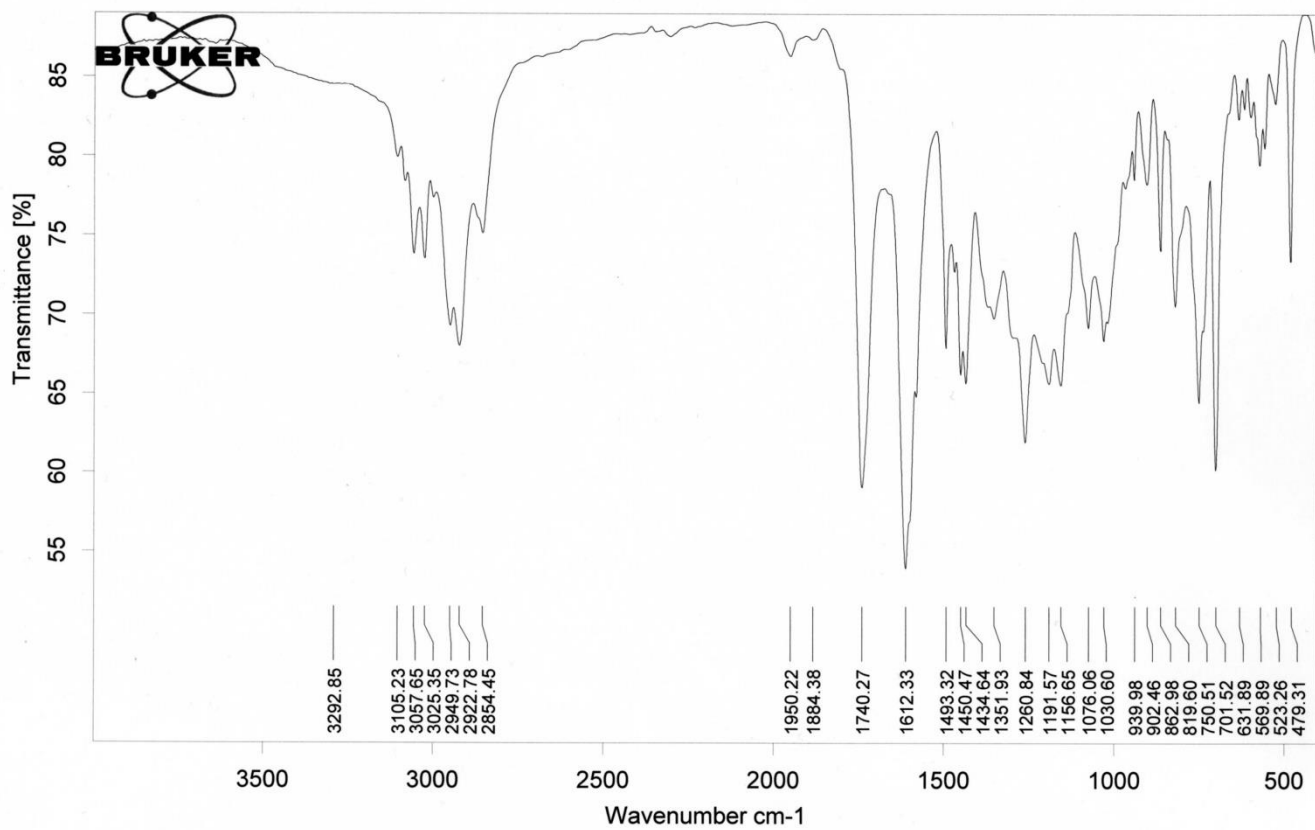

D:\temp-files\FTIR files\201501\20150121\MIR\_TR\_DTGS\_blank KBr\_chang706301.0.dpt

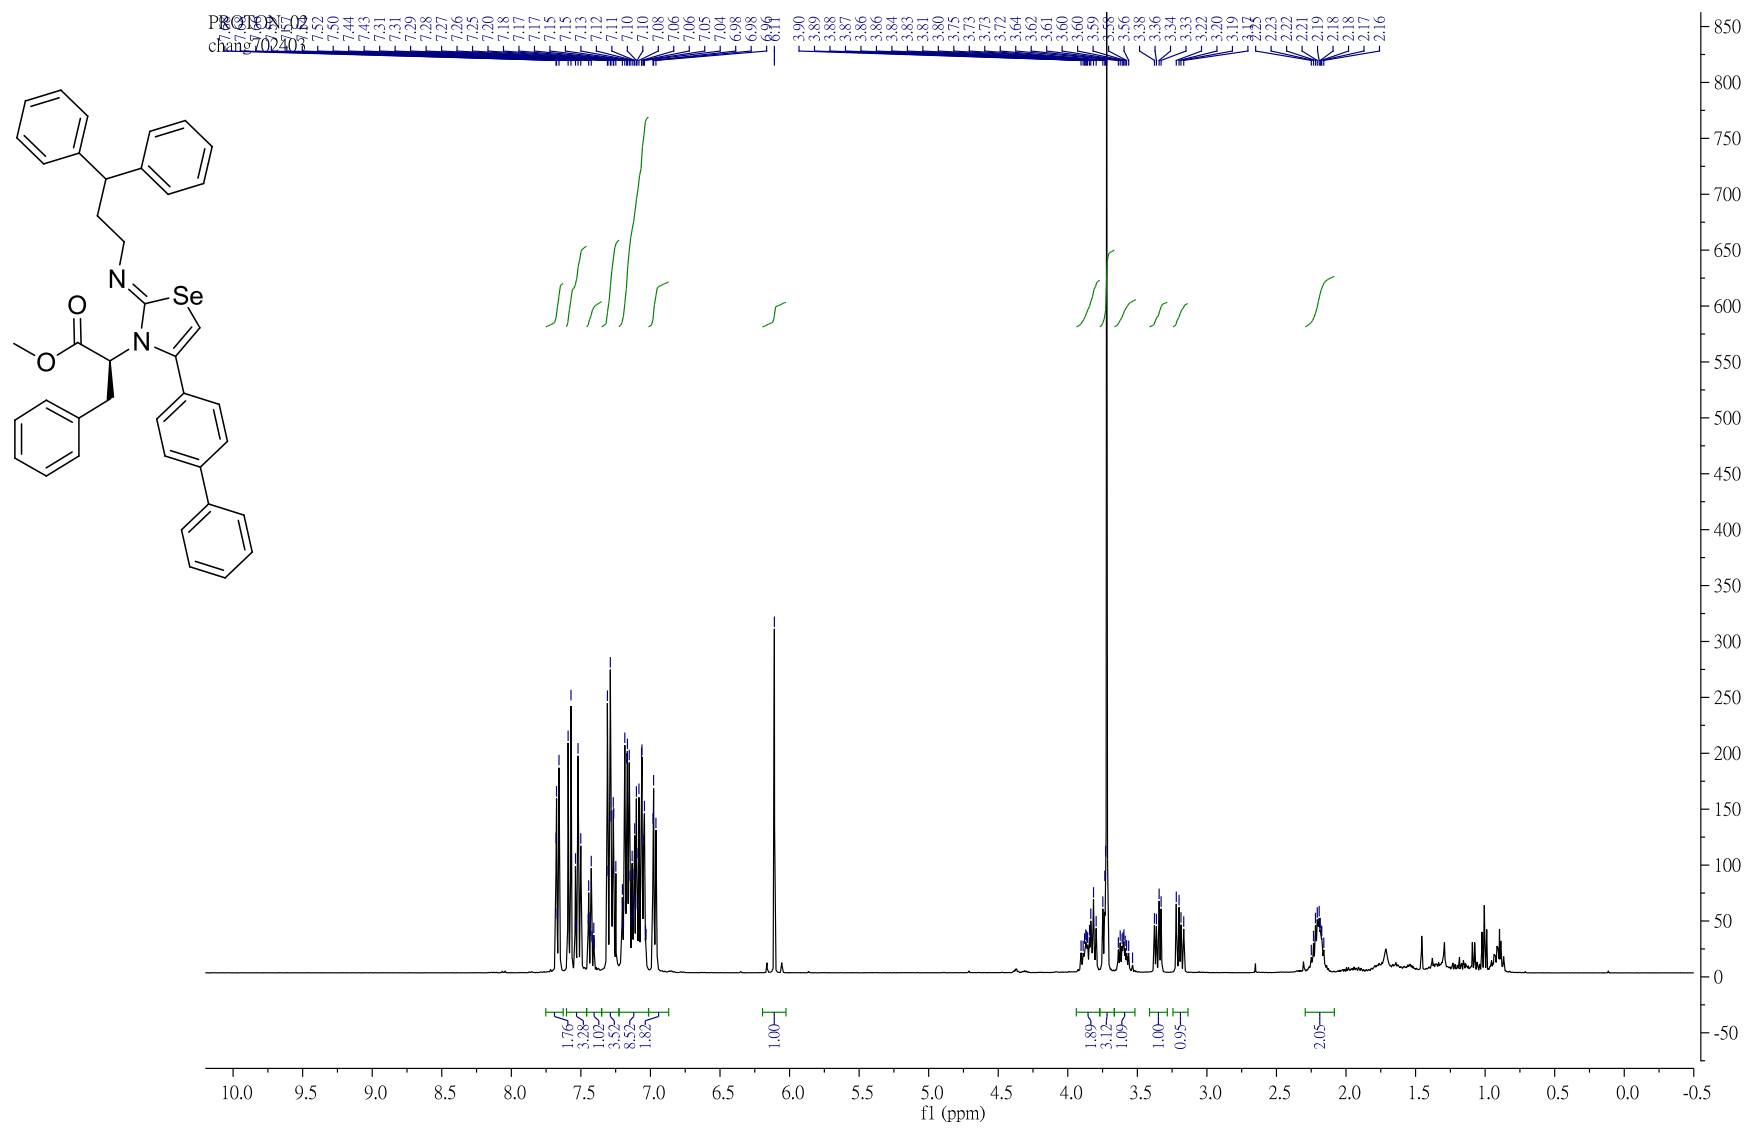

PROTON 02  
 7.26, 7.25, 7.50, 7.50, 7.44, 7.44, 7.44, 7.31, 7.31, 7.31, 7.28, 7.27, 7.27, 7.26, 7.25, 7.20, 7.18, 7.17, 7.17, 7.15, 7.15, 7.13, 7.12, 7.11, 7.11, 7.10, 7.08, 7.06, 7.06, 7.05, 7.05, 7.04, 7.04, 6.98, 6.98, 6.97, 3.90, 3.89, 3.88, 3.87, 3.86, 3.86, 3.84, 3.84, 3.81, 3.80, 3.80, 3.75, 3.73, 3.72, 3.64, 3.62, 3.61, 3.60, 3.60, 3.59, 3.58, 3.56, 3.38, 3.36, 3.34, 3.33, 3.22, 3.20, 3.19, 3.15, 3.15, 2.23, 2.22, 2.21, 2.19, 2.18, 2.18, 2.17, 2.16

CARBON\_01  
chang702403

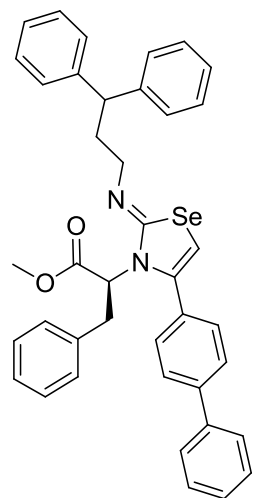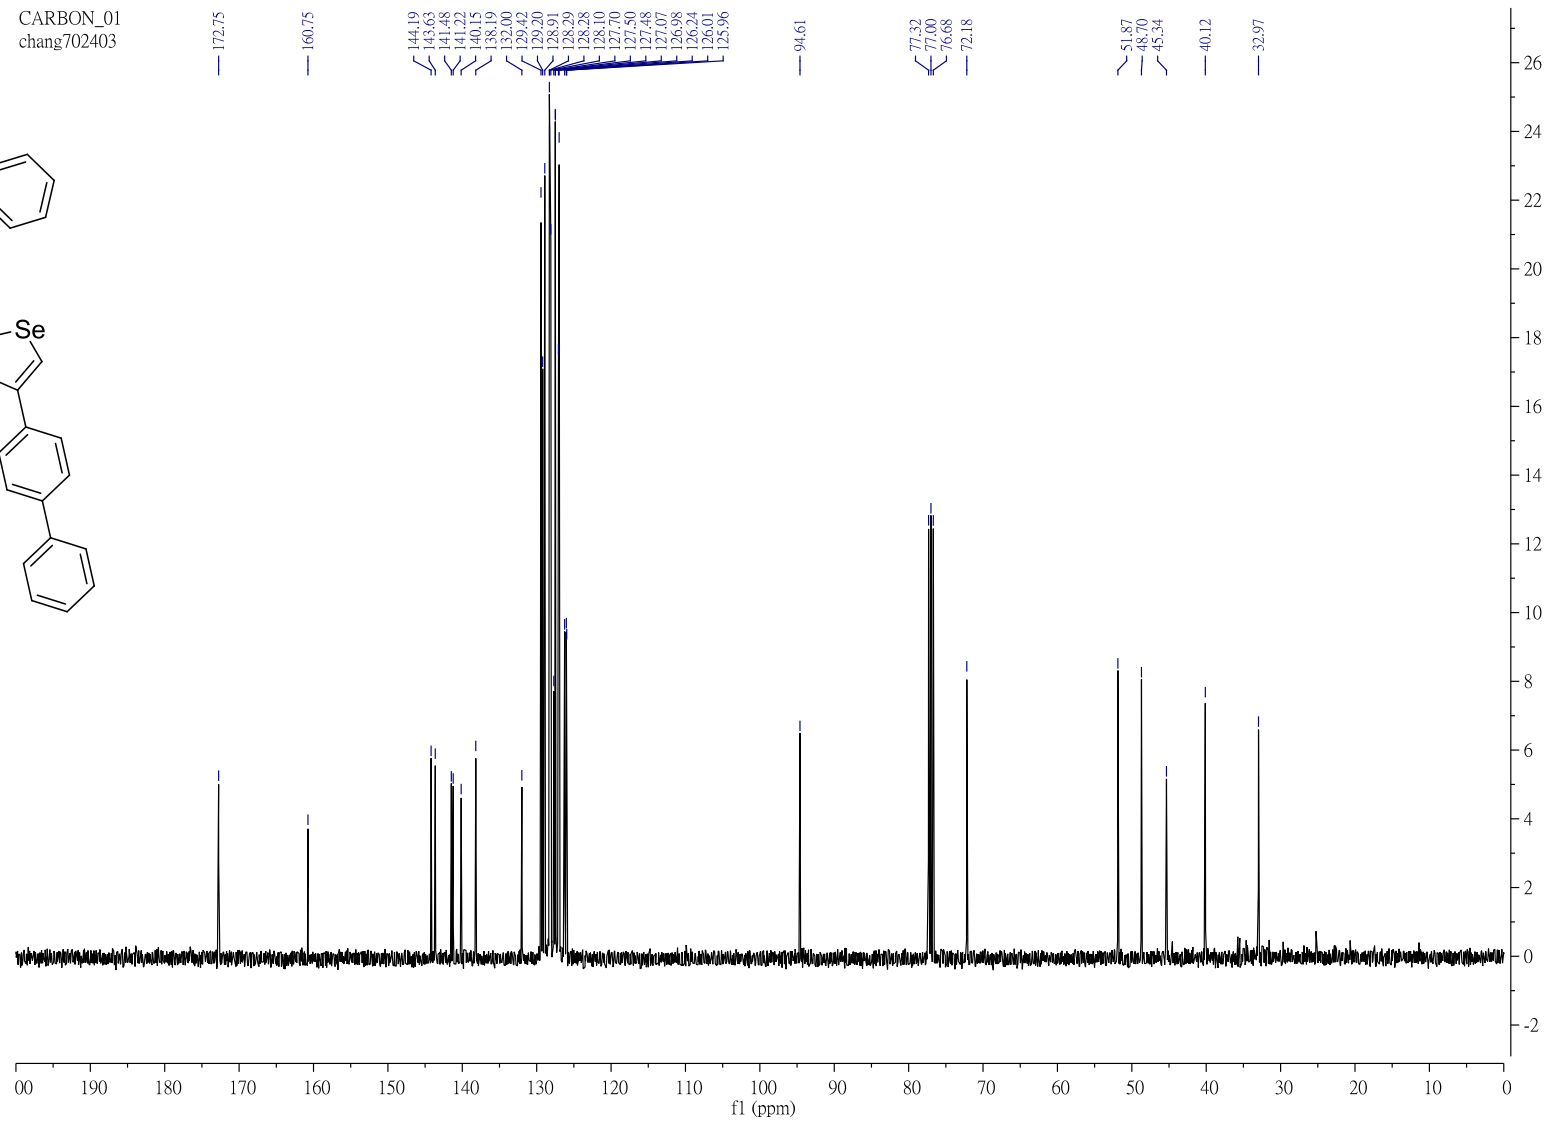

51 C<sup>13</sup> NMR



chang702401

2014030412 27 (1.849) Cn (Cen,2, 80.00, Ht); Sm (Mn, 2x0.75); Sb (3,40.00); Cm (26:30-12:23x3.000)

Scan ES+  
1.87e7

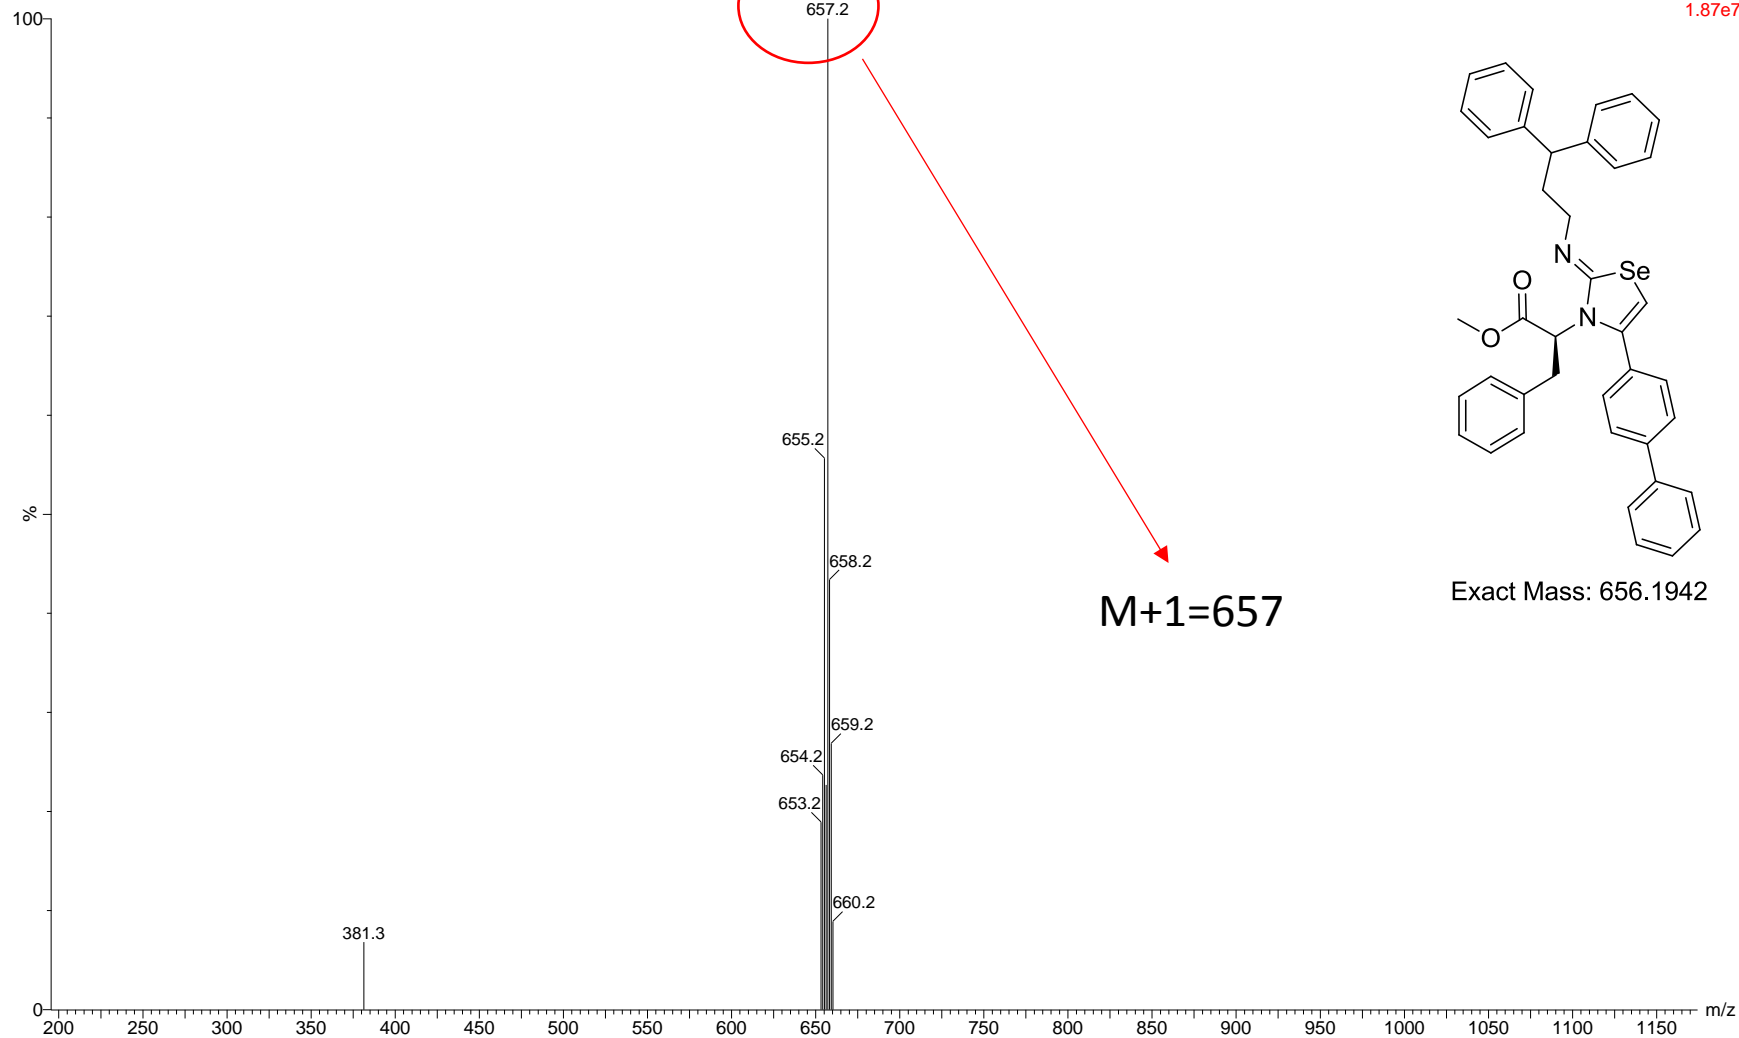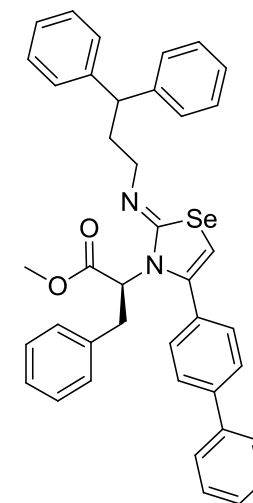

Exact Mass: 656.1942

51 LR-MS

S121

# Display Report

## Analysis Info

Analysis Name D:\Data\NCTU SERVICE\Data\20140626\704201 655 ESI+\_GD8\_01\_2025.d  
Method Small molecule.m  
Sample Name 704201 655 ESI+  
Comment

Acquisition Date 6/26/2014 10:05:30 AM

Operator NCTU  
Instrument impact HD 1819696.00164

## Acquisition Parameter

|             |          |                      |          |                  |           |
|-------------|----------|----------------------|----------|------------------|-----------|
| Source Type | ESI      | Ion Polarity         | Positive | Set Nebulizer    | 1.0 Bar   |
| Focus       | Active   | Set Capillary        | 4500 V   | Set Dry Heater   | 200 °C    |
| Scan Begin  | 50 m/z   | Set End Plate Offset | -500 V   | Set Dry Gas      | 6.0 l/min |
| Scan End    | 1500 m/z | Set Charging Voltage | 2000 V   | Set Divert Valve | Waste     |
|             |          | Set Corona           | 0 nA     | Set APCI Heater  | 0 °C      |

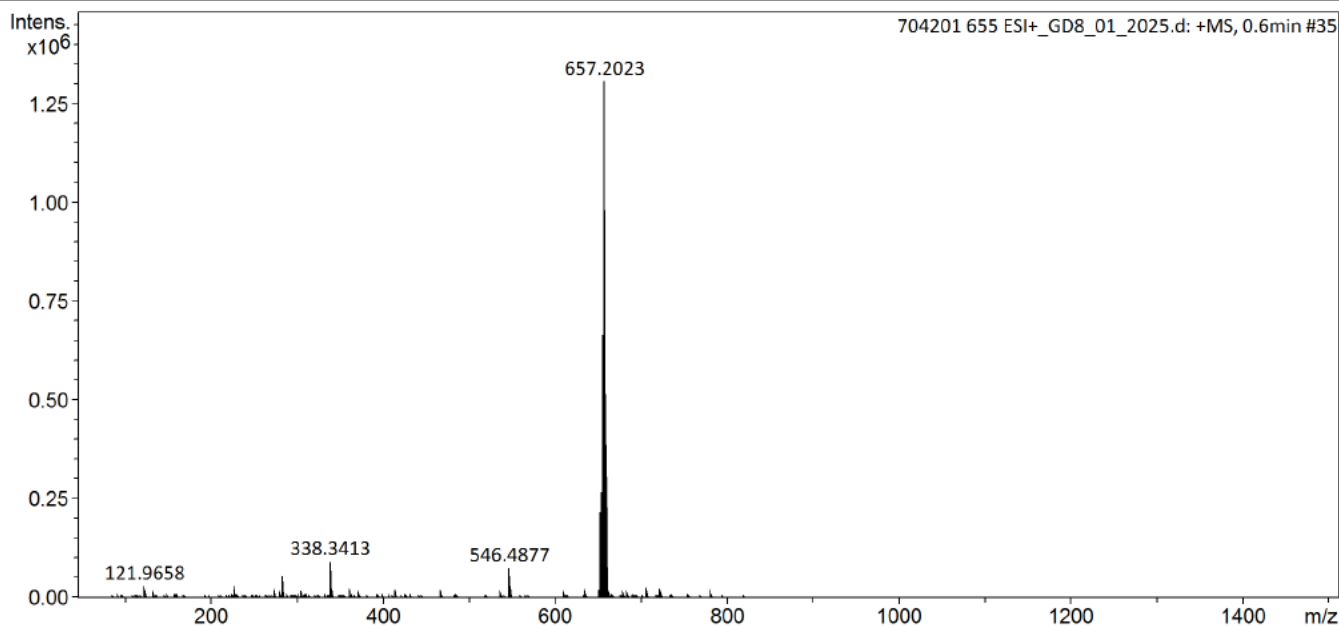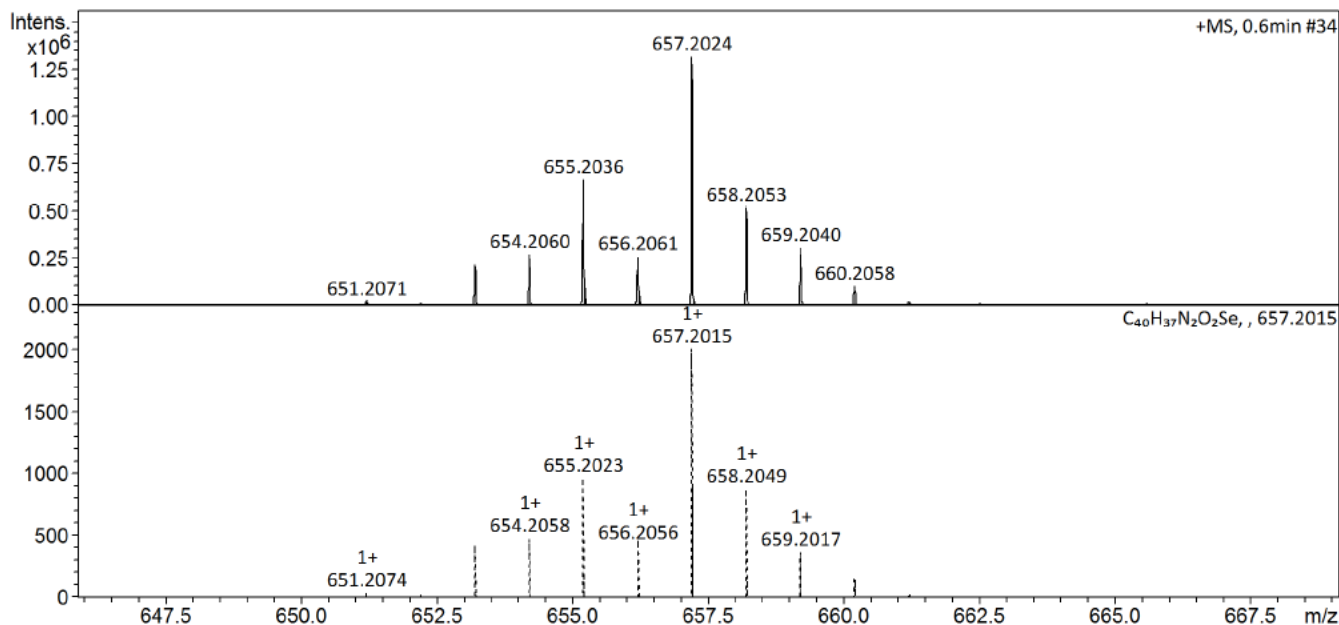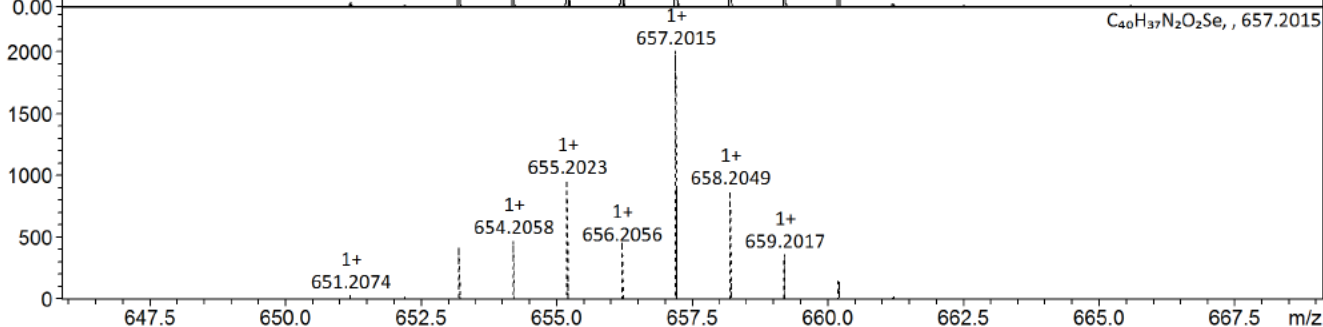

51 HR-MS

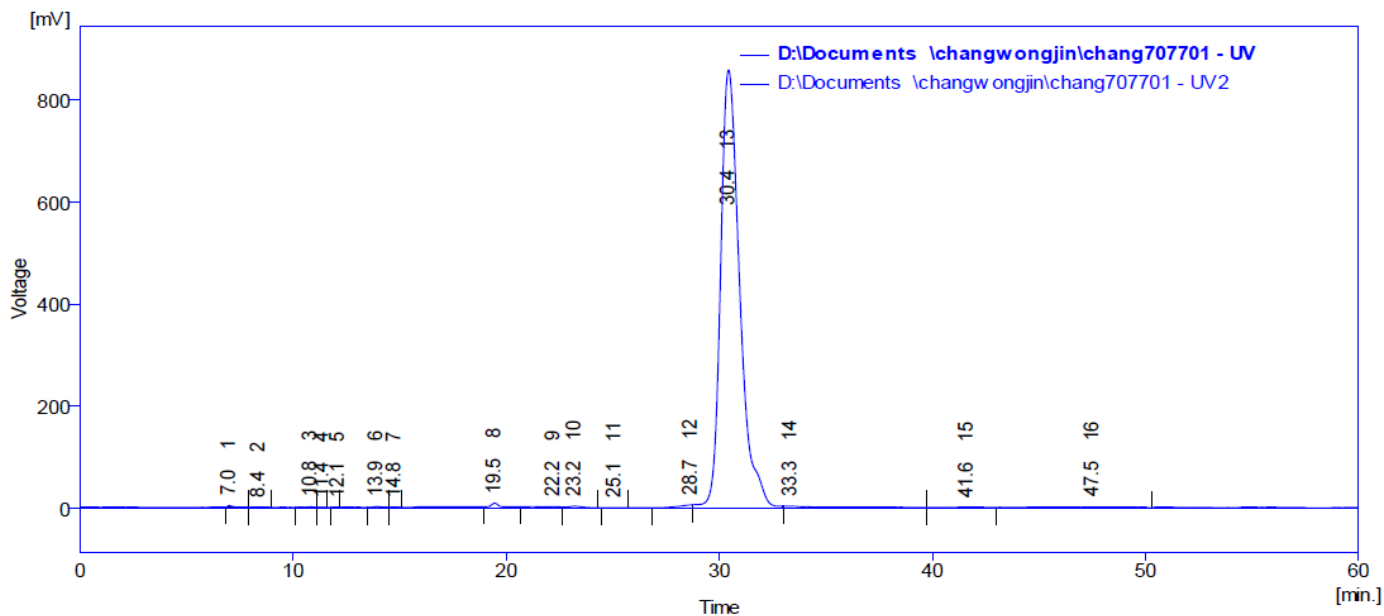

Result Table (Uncal - D:\Documents \changwongjin\chang707701 - UV)

|    | Reten. Time [min] | Area [mV.s] | Height [mV] | Area [%] | Height [%] |
|----|-------------------|-------------|-------------|----------|------------|
| 1  | 6.992             | 50.714      | 3.013       | 0.1      | 0.3        |
| 2  | 8.380             | 28.267      | 0.820       | 0.0      | 0.1        |
| 3  | 10.820            | 21.773      | 0.949       | 0.0      | 0.1        |
| 4  | 11.380            | 8.434       | 0.472       | 0.0      | 0.1        |
| 5  | 12.104            | 12.814      | 0.674       | 0.0      | 0.1        |
| 6  | 13.912            | 47.136      | 2.248       | 0.1      | 0.3        |
| 7  | 14.752            | 19.912      | 0.729       | 0.0      | 0.1        |
| 8  | 19.456            | 340.494     | 9.129       | 0.6      | 1.0        |
| 9  | 22.212            | 226.305     | 2.453       | 0.4      | 0.3        |
| 10 | 23.204            | 154.527     | 3.470       | 0.3      | 0.4        |
| 11 | 25.092            | 17.675      | 0.455       | 0.0      | 0.1        |
| 12 | 28.676            | 273.995     | 6.022       | 0.5      | 0.7        |
| 13 | 30.432            | 53679.511   | 858.846     | 94.6     | 95.7       |

|    | Reten. Time [min] | Area [mV.s] | Height [mV] | Area [%] | Height [%] |
|----|-------------------|-------------|-------------|----------|------------|
| 14 | 33.348            | 755.568     | 3.707       | 1.3      | 0.4        |
| 15 | 41.628            | 282.268     | 1.827       | 0.5      | 0.2        |
| 16 | 47.524            | 817.538     | 2.261       | 1.4      | 0.3        |
|    | Total             | 56736.931   | 897.078     | 100.0    | 100.0      |

### 5l chiral HPLC

PROTON\_02  
chang501601

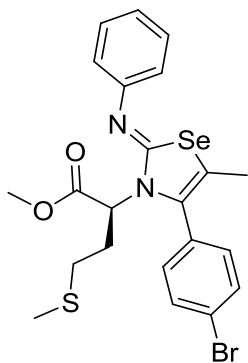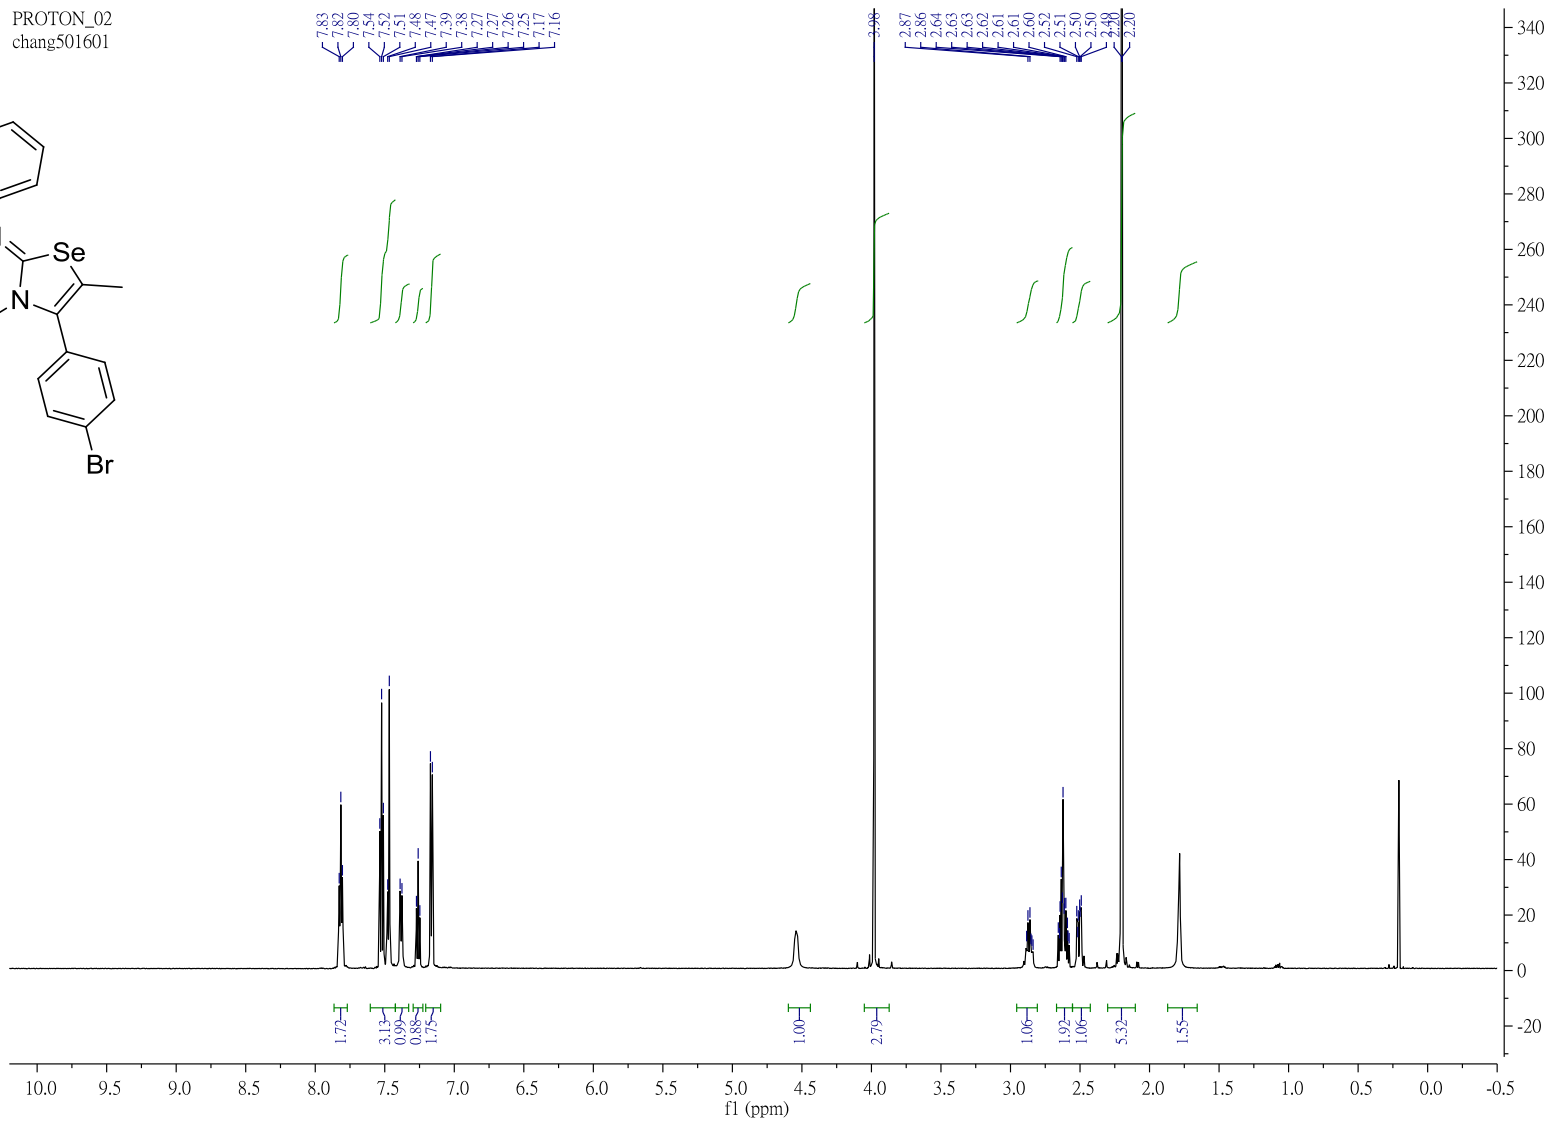

### 7a $^1\text{H}$ NMR

CARBON\_01  
chang501601

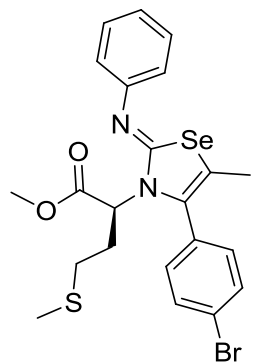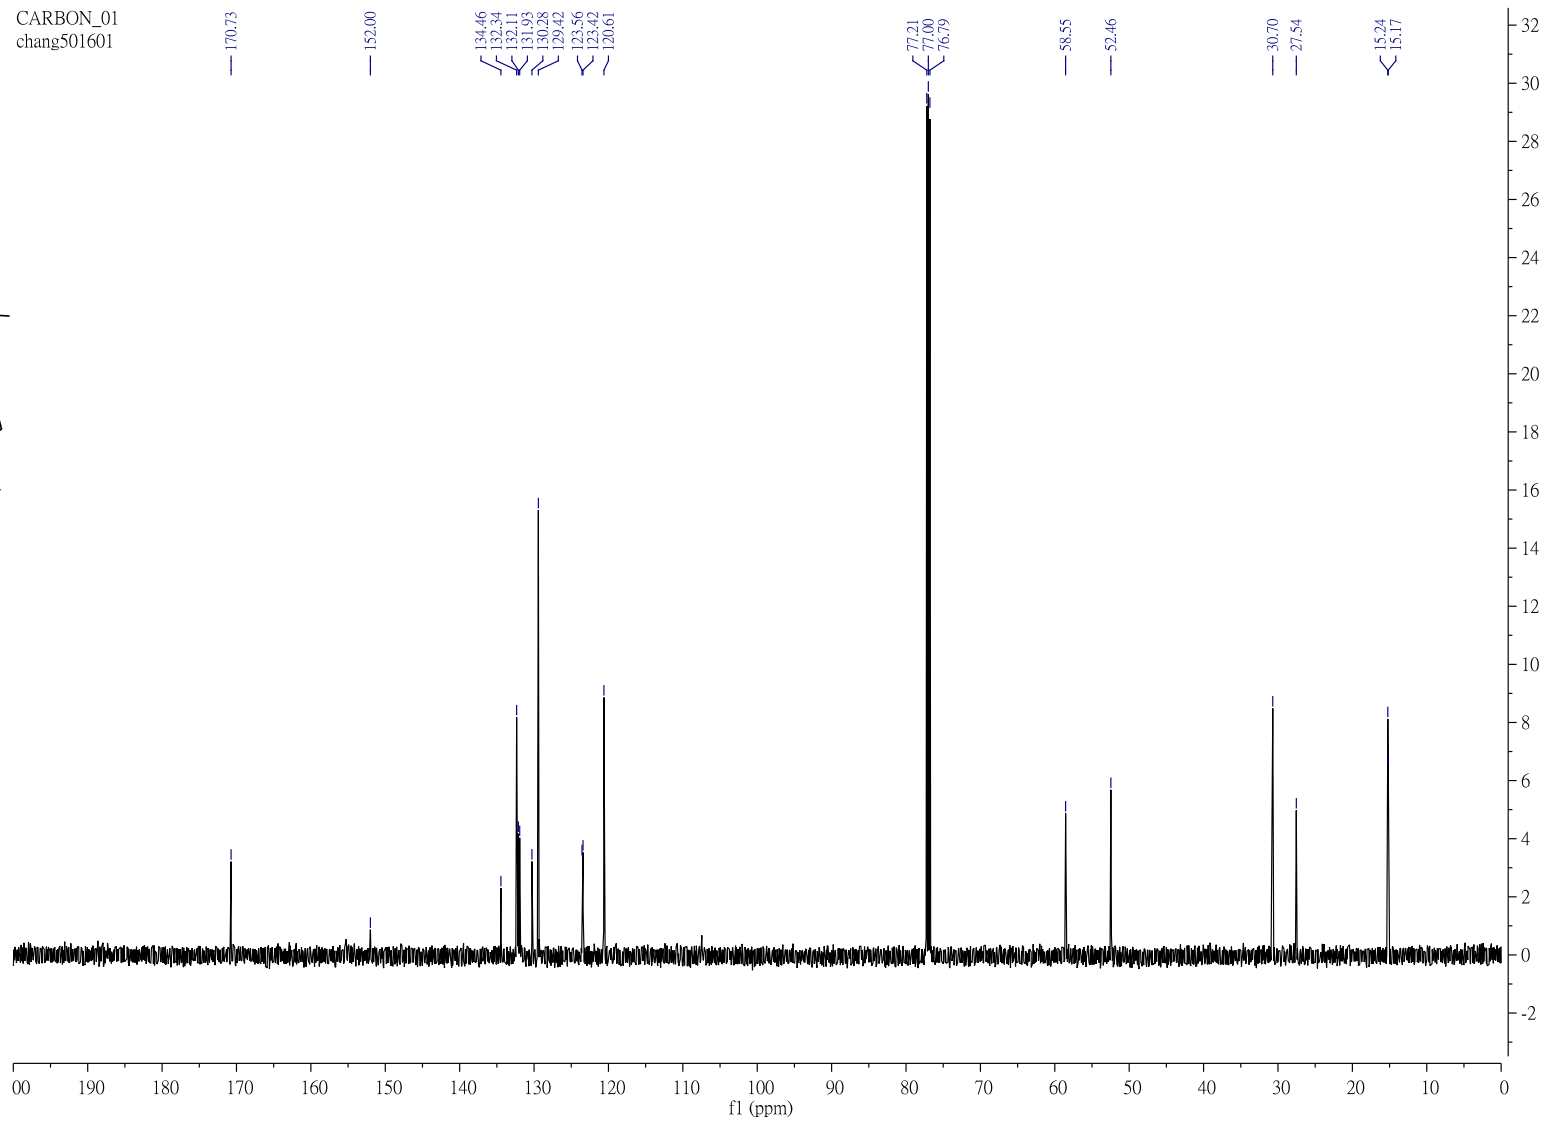

7a  $\text{C}^{13}$  NMR

S125

chang501601

Sample Name:  
chang501601  
Data Collected on:  
localhost.localdomain-vnmrs600  
Archive directory:  
/home/suncm/vnmrsws/data  
Sample directory:  
chang501601\_20111123\_01  
Fidfile: DEPT\_01



Pulse Sequence: DEPT  
Solvent: cdcl3  
Data collected on: Nov 23 2011

Temp. 25.0 C / 298.1 K  
Operator: chang

Relax. delay 1.000 sec  
Pulse 90.0 degrees  
Acq. time 0.865 sec  
Width 37878.8 Hz  
32 repetitions  
OBSERVE C13, 150.8029747 MHz  
DECOUPLE H1, 599.7359663 MHz  
Power 43 dB  
on during acquisition  
off during delay  
WALTZ-16 modulated  
DATA PROCESSING  
Line broadening 1.0 Hz  
FT size 65536  
Total time 12 min

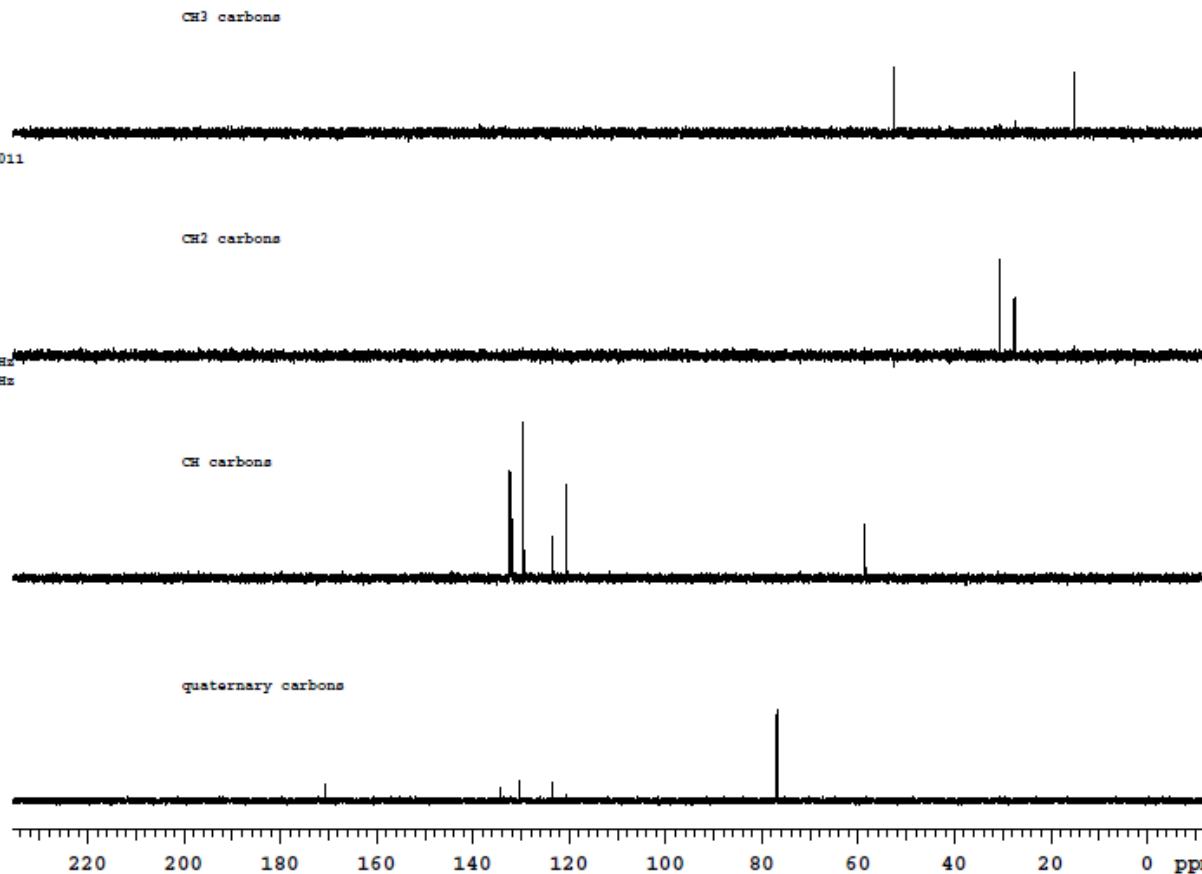

Plotname: DEPT\_01\_plot02

### 7a DEPT

chang501601

2011120624 28 (1.918) Cn (Top,4, Ht); Sm (Mn, 2x0.75); Sb (3,40.00); Cm (28:33-1:26x5.000)

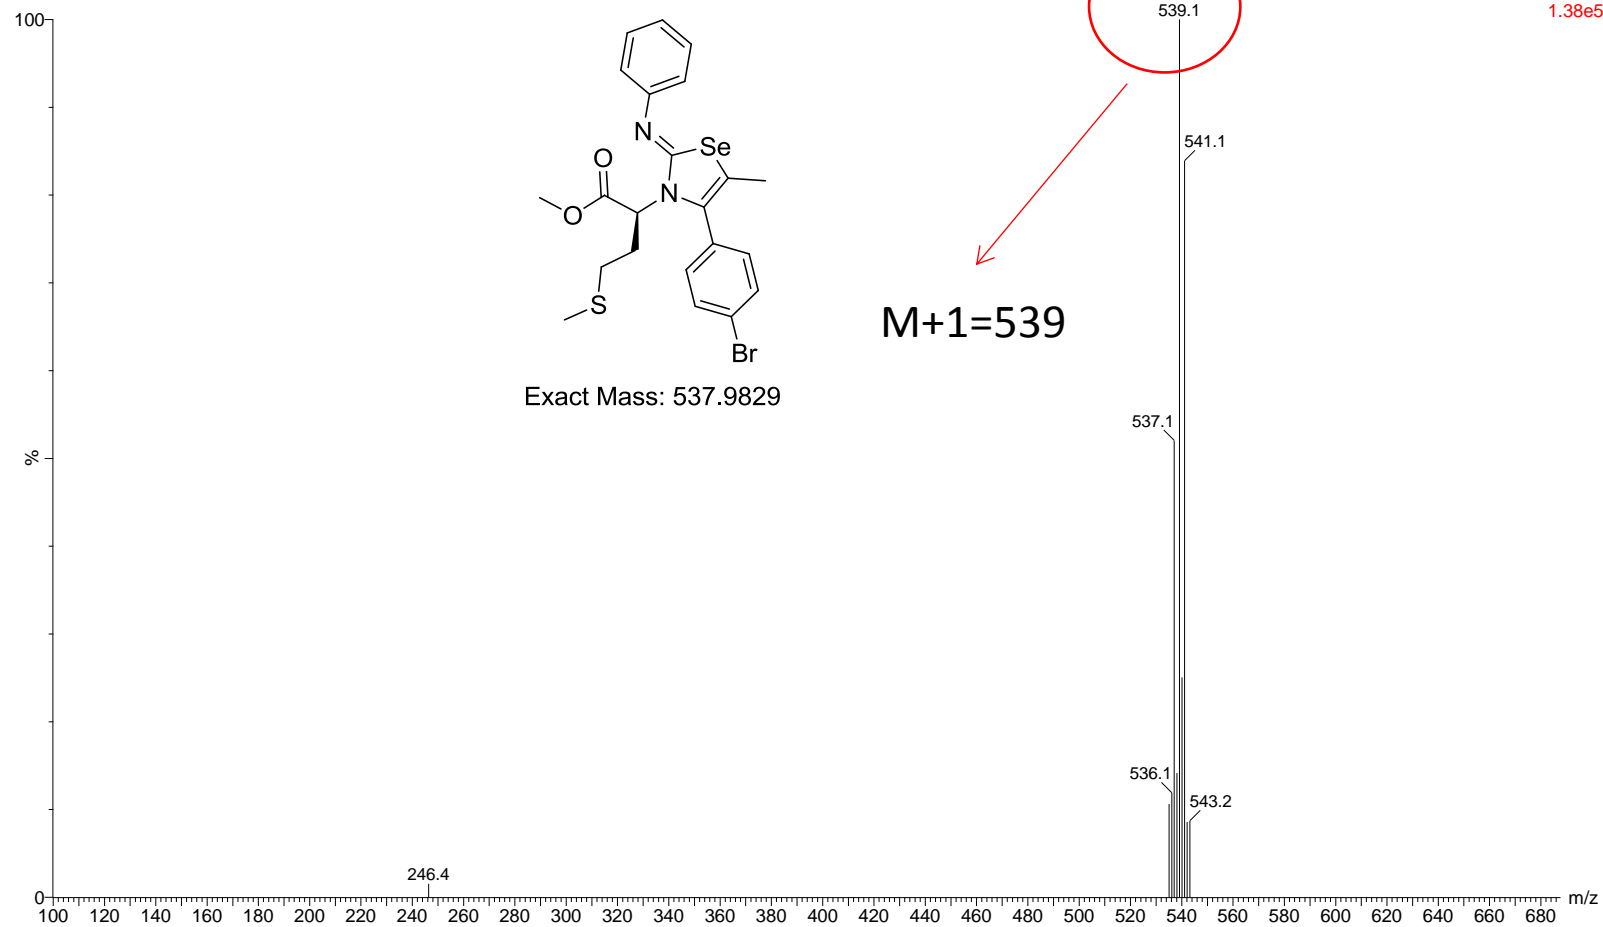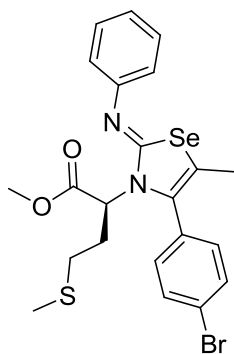

Exact Mass: 537.9829

M+1=539

7a LR-MS

NCTU-SUN-15025 ESI+  
Molecular Formula: C<sub>22</sub>H<sub>24</sub>BrN<sub>2</sub>O<sub>2</sub>SSe  
Exact Mass: 538.9907  
Measured Mass: 538.9912

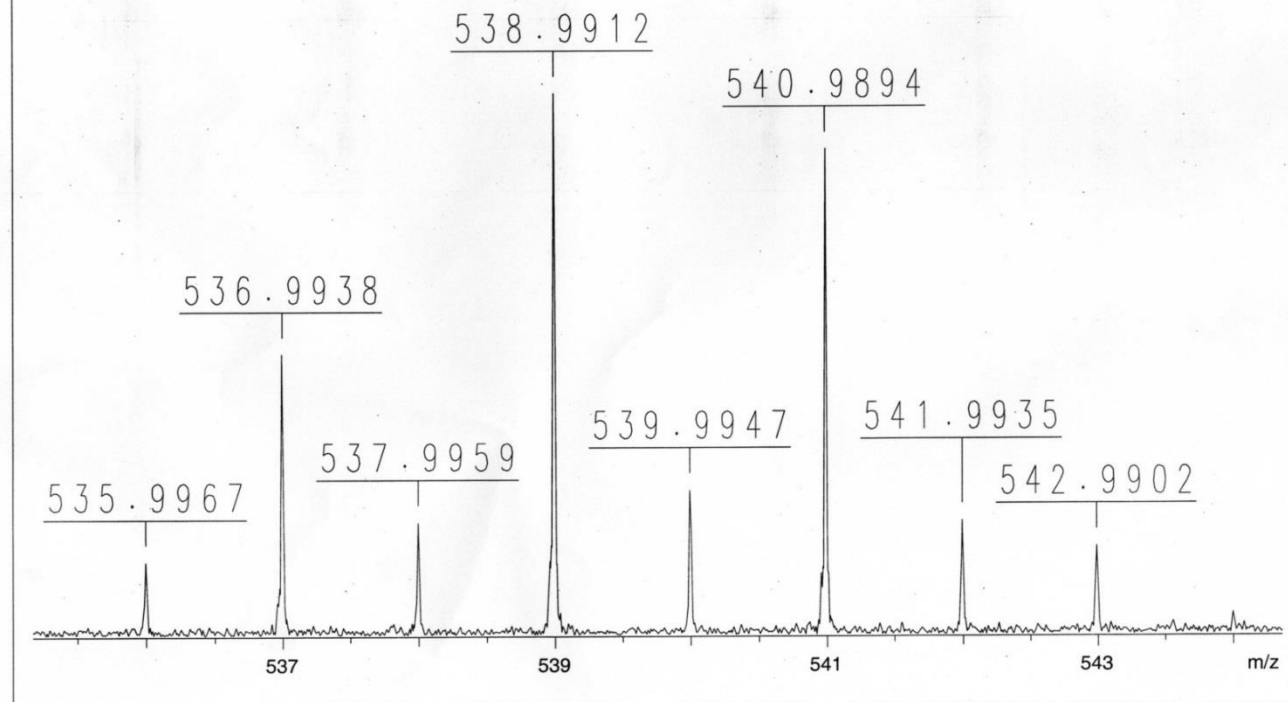

/d=/Data/yl/NCTUSUN15025/2/pdata/1 Administrator Wed Mar 13 11:13:15 2013

**7a HR-MS**



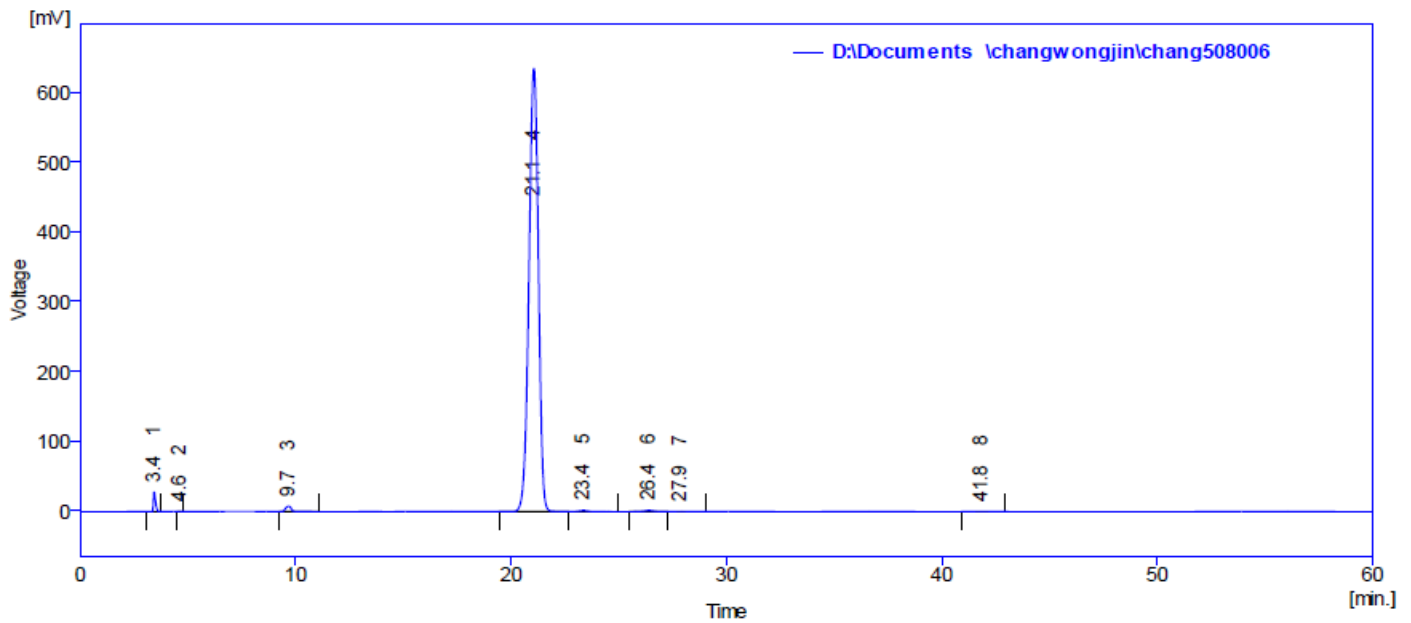

Result Table (Uncal - D:\Documents \changwongjin\chang508006)

|   | Reten. Time [min] | Area [mV.s] | Height [mV] | Area [%] | Height [%] |
|---|-------------------|-------------|-------------|----------|------------|
| 1 | 3.428             | 199.038     | 28.366      | 1.0      | 4.2        |
| 2 | 4.620             | 3.022       | 0.431       | 0.0      | 0.1        |
| 3 | 9.676             | 147.879     | 7.759       | 0.7      | 1.1        |
| 4 | 21.060            | 19390.209   | 635.996     | 97.3     | 93.9       |
| 5 | 23.368            | 66.168      | 1.908       | 0.3      | 0.3        |
| 6 | 26.392            | 68.653      | 2.015       | 0.3      | 0.3        |
| 7 | 27.864            | 20.406      | 0.551       | 0.1      | 0.1        |
| 8 | 41.828            | 27.180      | 0.538       | 0.1      | 0.1        |
|   | Total             | 19922.555   | 677.563     | 100.0    | 100.0      |

### 7a chiral HPLC

SAMPLE : \_\_\_\_\_  
 ID # : 005  
 LAMP  $\lambda$  : 589 nm  
 CONC : 0.01000 g/ml  
 CELL LG: 010 mm  
 TEMP CORR: +0.00037  
 INTERVAL: 1 min

SPECIFIC ROTATION  $[\alpha]$   
 COUNT  $[\alpha](^\circ)$  TEMP( $^\circ\text{C}$ )  
 01 - 98.4995 21.3  
 02 -100.5000 21.3  
 03 -102.5000 21.3  
 04 -105.5000 21.3  
 05 -107.5000 21.3  
 06 -110.0000 21.3  
 07 -112.5000 21.3  
 08 -114.5000 21.3  
 09 -117.5000 21.3  
 10 -120.0000 21.3

MEAN = -108.9000°  
 $\sigma(N-1)$  = 7.2717°  
 C.V. = - 6.6774%

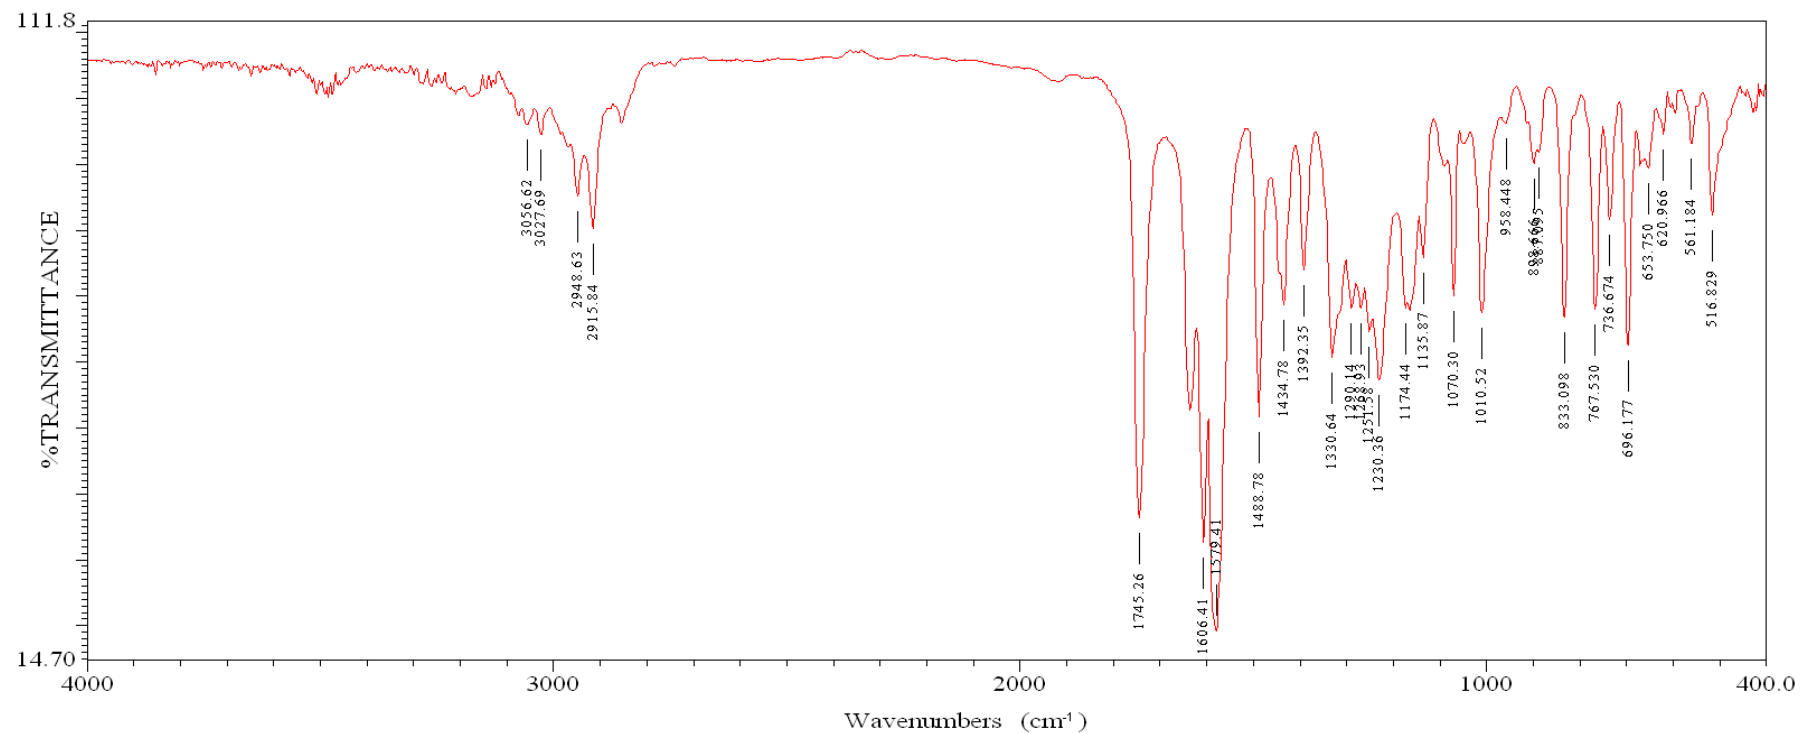

7a FT-IR

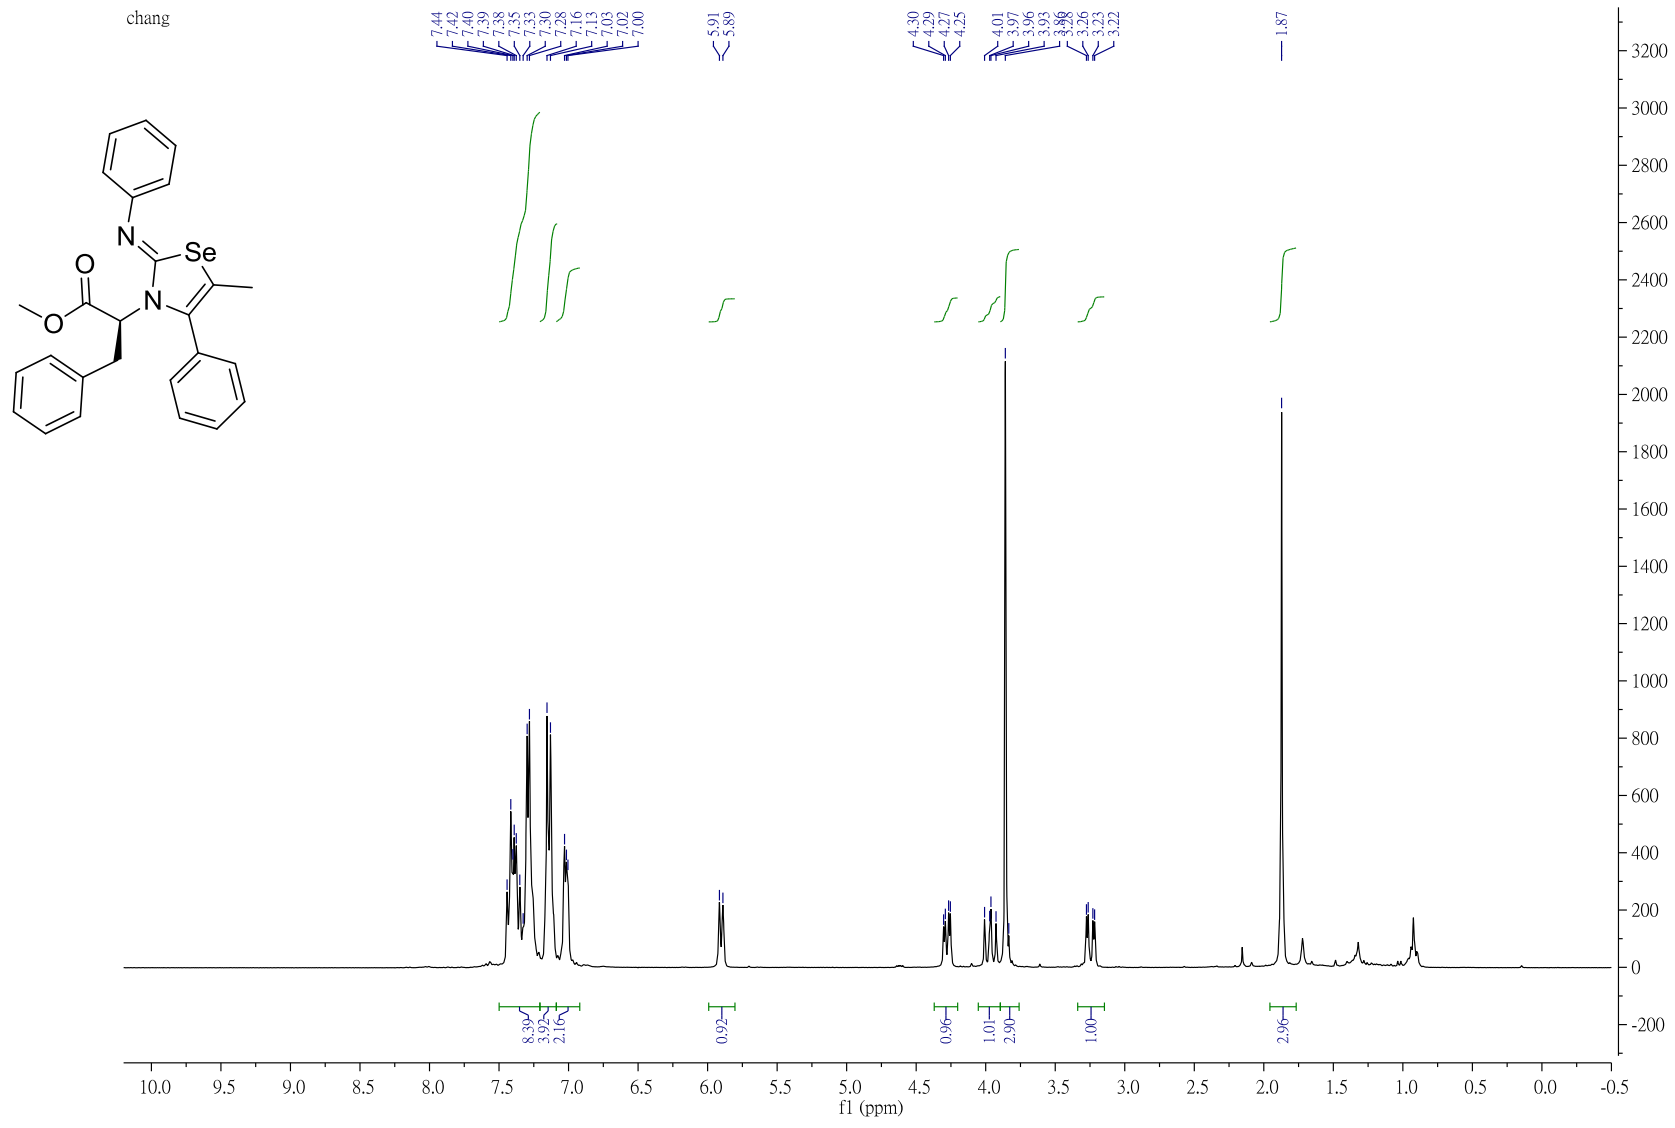

**7b  $H^1$ NMR**

S131

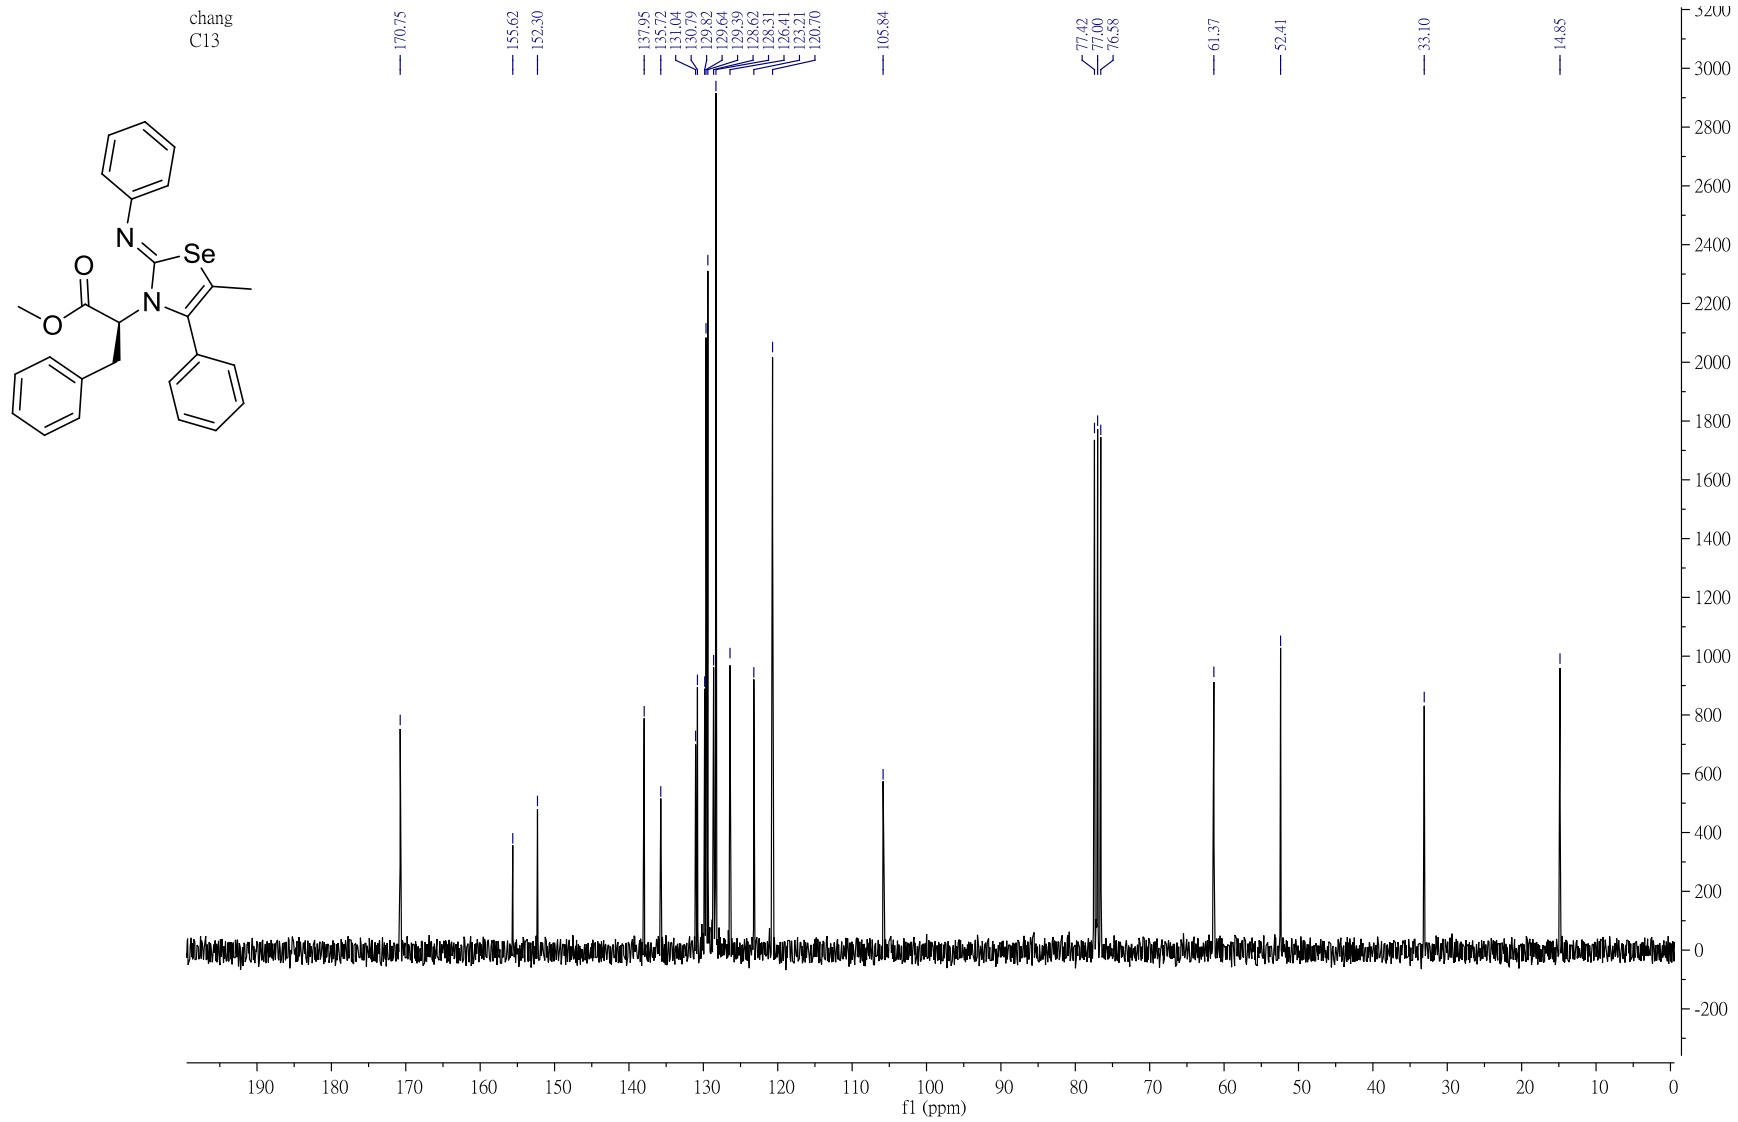

7b C<sup>13</sup>NMR

chang501801

2011120611 11 (0.753) Cn (Top,4, Ht); Sm (Mn, 2x0.75); Sb (3,40.00 ); Cm (9:14-2:8x5.000)

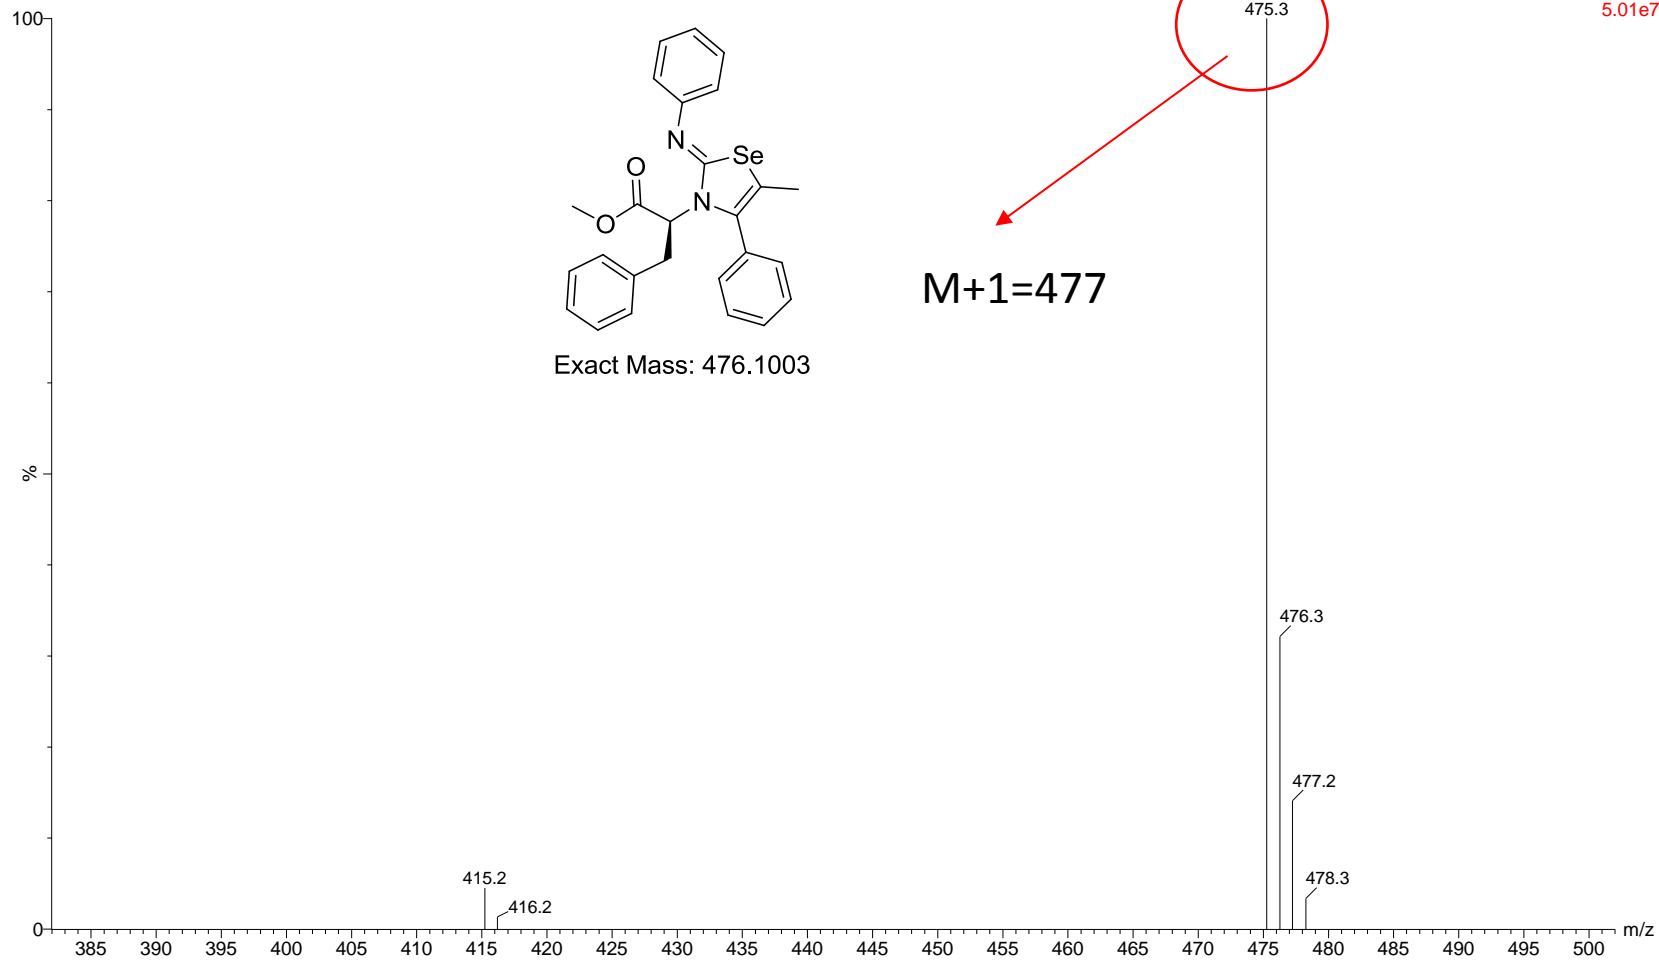

7b LR-MS

S133

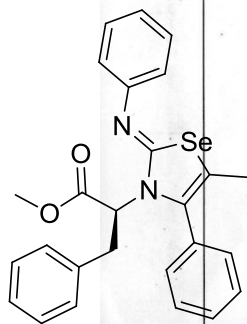

NCTU-SUN-15023 ESI+  
Molecular Formula: C<sub>26</sub>H<sub>25</sub>N<sub>2</sub>O<sub>2</sub>Se  
Exact Mass: 477.1081  
Measured Mass: 477.1083

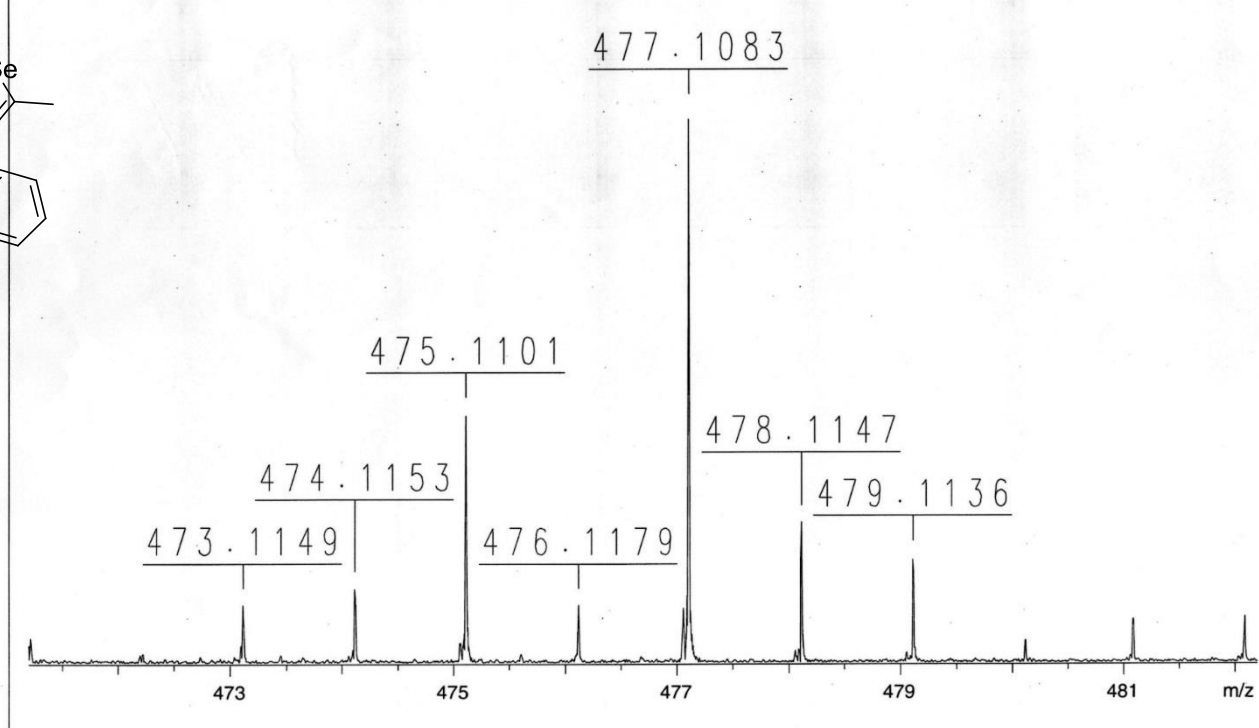

/d=/Data/yy/NCTUSUN15023/1/pdata/1 Administrator Tue Jul 10 15:47:46 2012

7b HR-MS

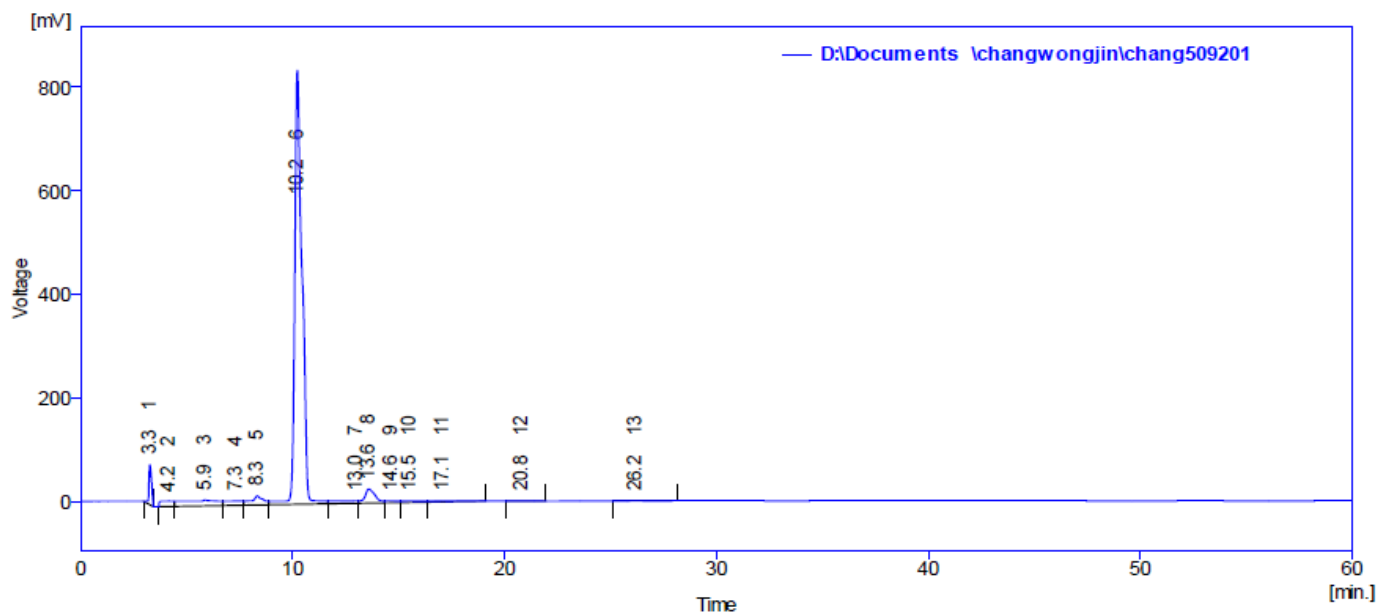

Result Table (Uncal - D:\Documents \changwongjin\chang509201)

|    | Reten. Time [min] | Area [mV.s] | Height [mV] | Area [%] | Height [%] |
|----|-------------------|-------------|-------------|----------|------------|
| 1  | 3.256             | 673.615     | 77.152      | 2.6      | 7.7        |
| 2  | 4.152             | 446.343     | 10.512      | 1.7      | 1.0        |
| 3  | 5.856             | 1317.987    | 11.498      | 5.1      | 1.1        |
| 4  | 7.316             | 491.999     | 8.530       | 1.9      | 0.8        |
| 5  | 8.324             | 732.115     | 17.630      | 2.8      | 1.8        |
| 6  | 10.220            | 20107.981   | 836.984     | 78.1     | 83.3       |
| 7  | 12.980            | 435.720     | 4.753       | 1.7      | 0.5        |
| 8  | 13.592            | 921.613     | 27.433      | 3.6      | 2.7        |
| 9  | 14.648            | 159.601     | 3.685       | 0.6      | 0.4        |
| 10 | 15.508            | 202.112     | 3.165       | 0.8      | 0.3        |
| 11 | 17.064            | 186.026     | 1.960       | 0.7      | 0.2        |
| 12 | 20.804            | 23.091      | 0.438       | 0.1      | 0.0        |
| 13 | 26.188            | 38.056      | 0.502       | 0.1      | 0.0        |
|    | Total             | 25736.259   | 1004.239    | 100.0    | 100.0      |

### 7b chiral HPLC

SAMPLE : -----  
 ID # : 001  
 LAMP λ : 589 nm  
 CONC : 0.05000 g/ml  
 CELL LG: 010 mm  
 TEMP CORR: +0.00037  
 INTERVAL: 1 min

SPECIFIC ROTATION [α]  
 COUNT [α](°) TEMP(°C)  
 01 +368.4000 21.1  
 02 +368.7000 21.1  
 03 +368.4000 21.1  
 04 +367.7000 21.1  
 05 +367.8000 21.1  
 06 +367.4000 21.1  
 07 +366.9000 21.1  
 08 +366.6000 21.1  
 09 +366.4000 21.1  
 10 +365.9000 21.1

MEAN = +367.4200°  
 σ(N-1) = 0.94727°  
 C.V. = + 0.25782%

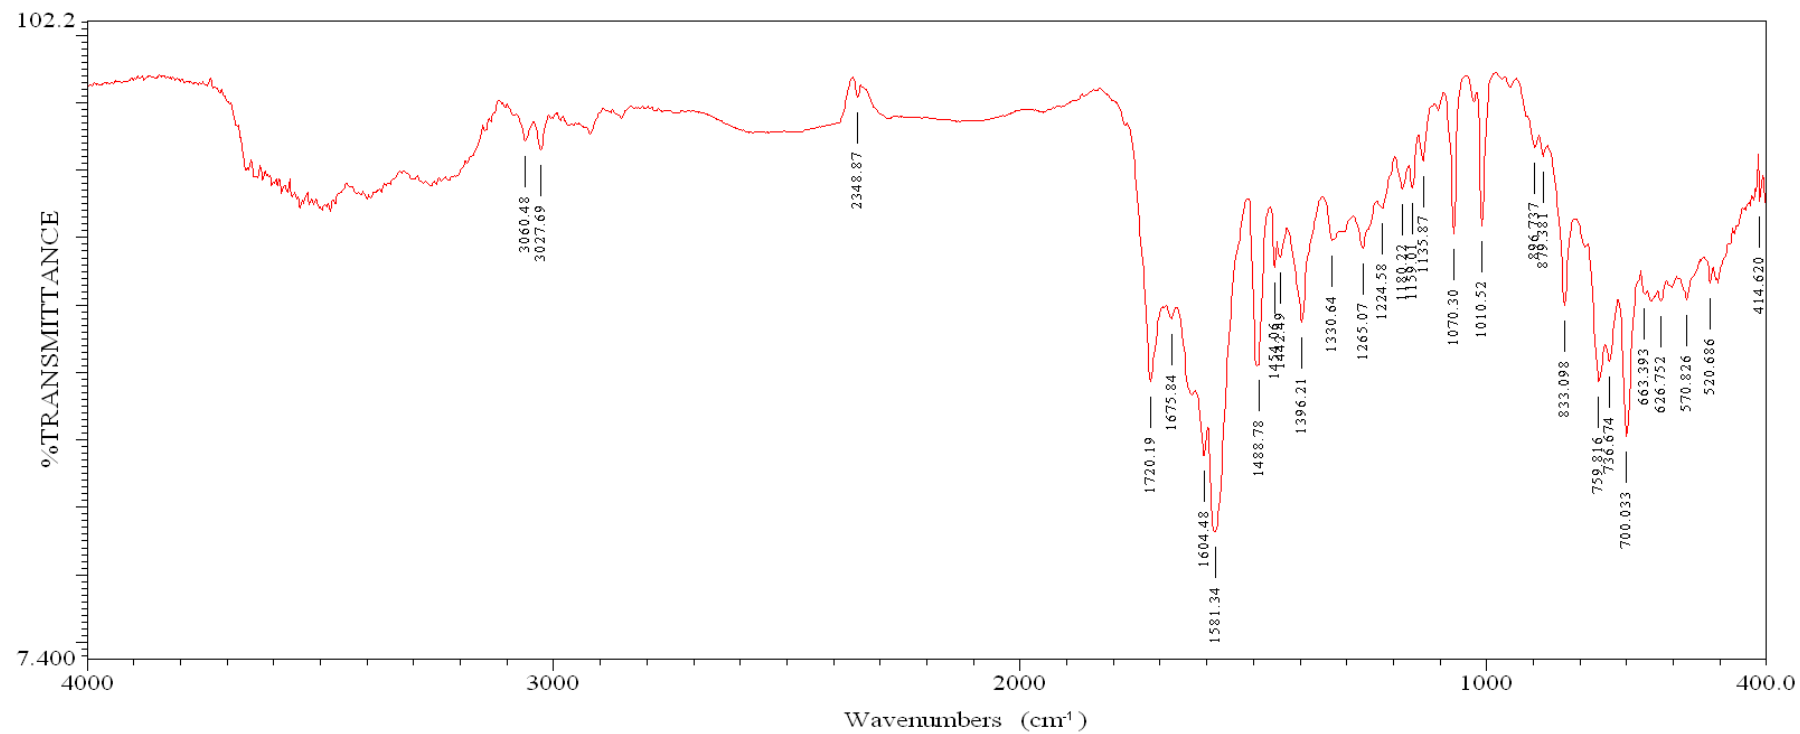

**7b FT-IR**



PROTON\_01

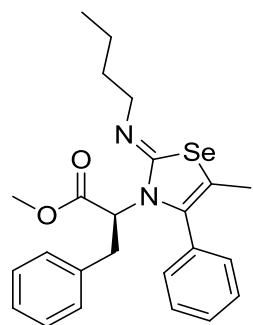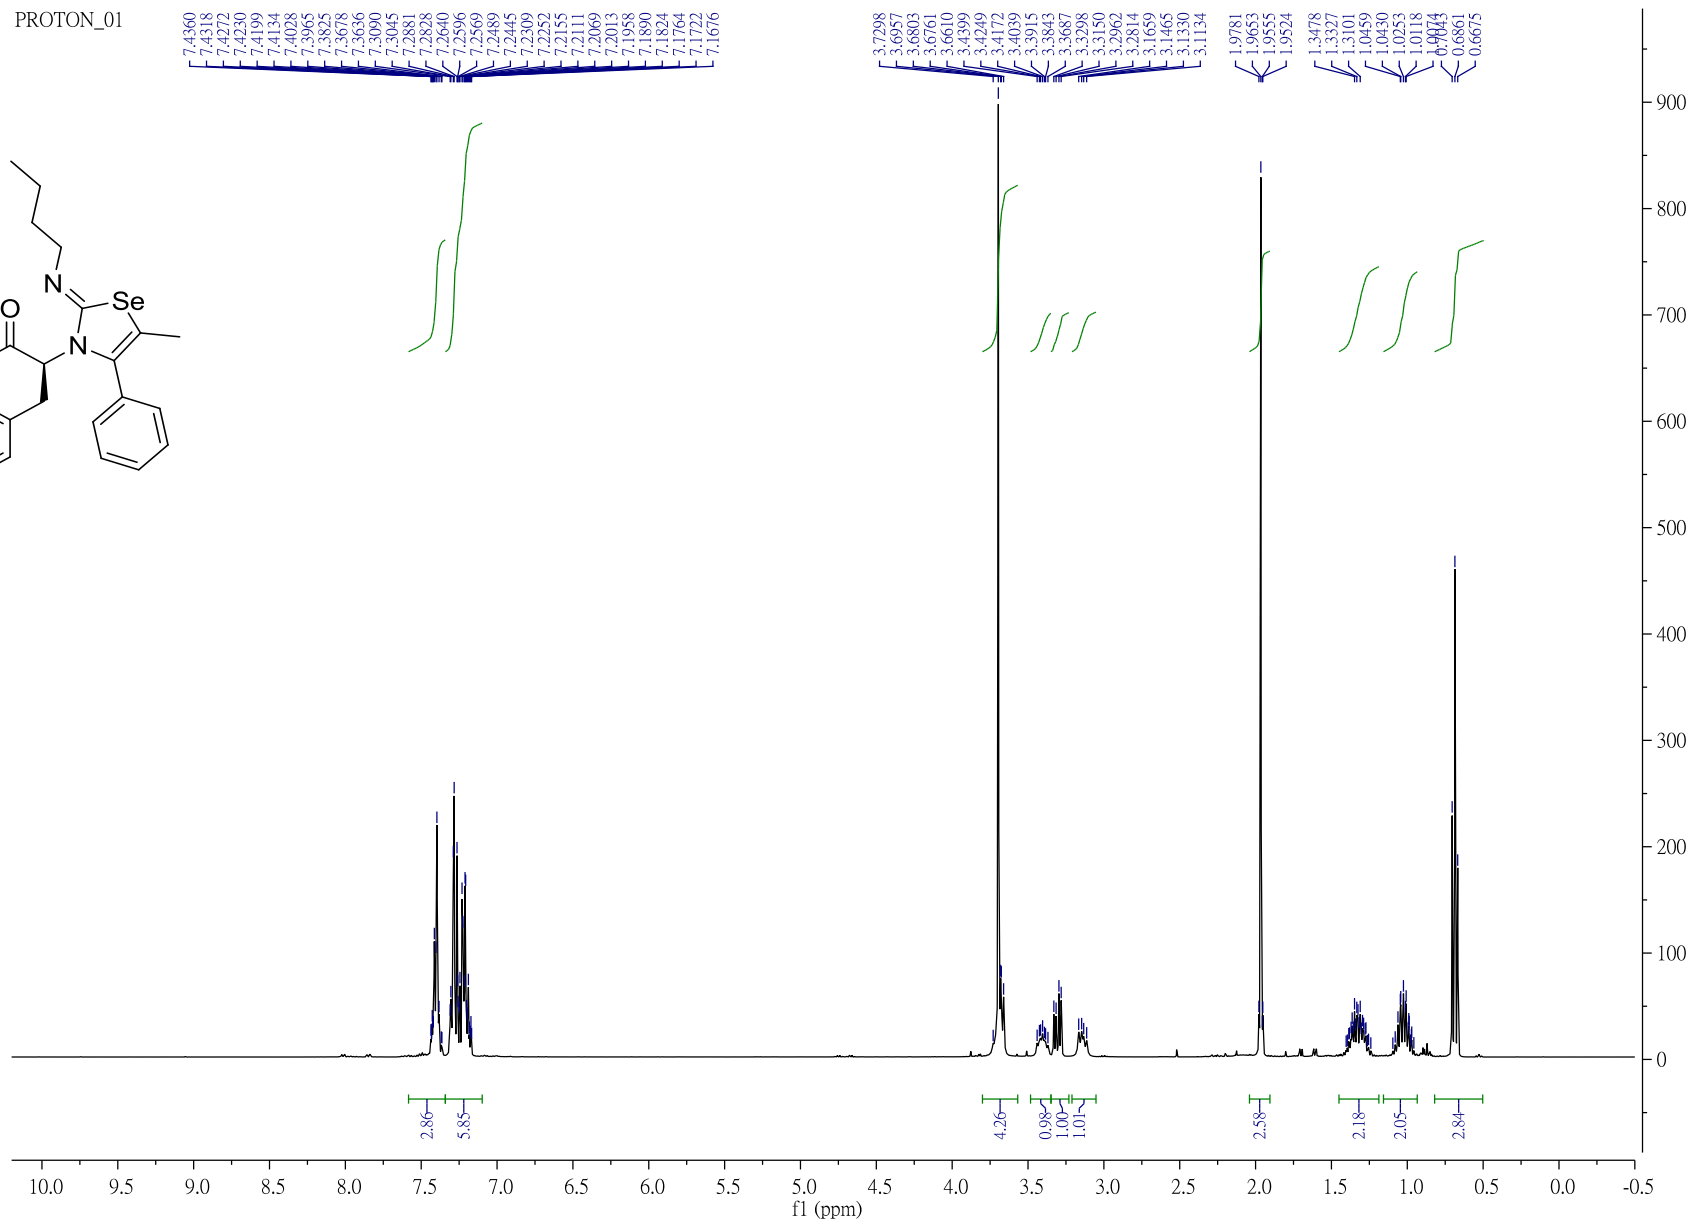

7c <sup>1</sup>H NMR

S137

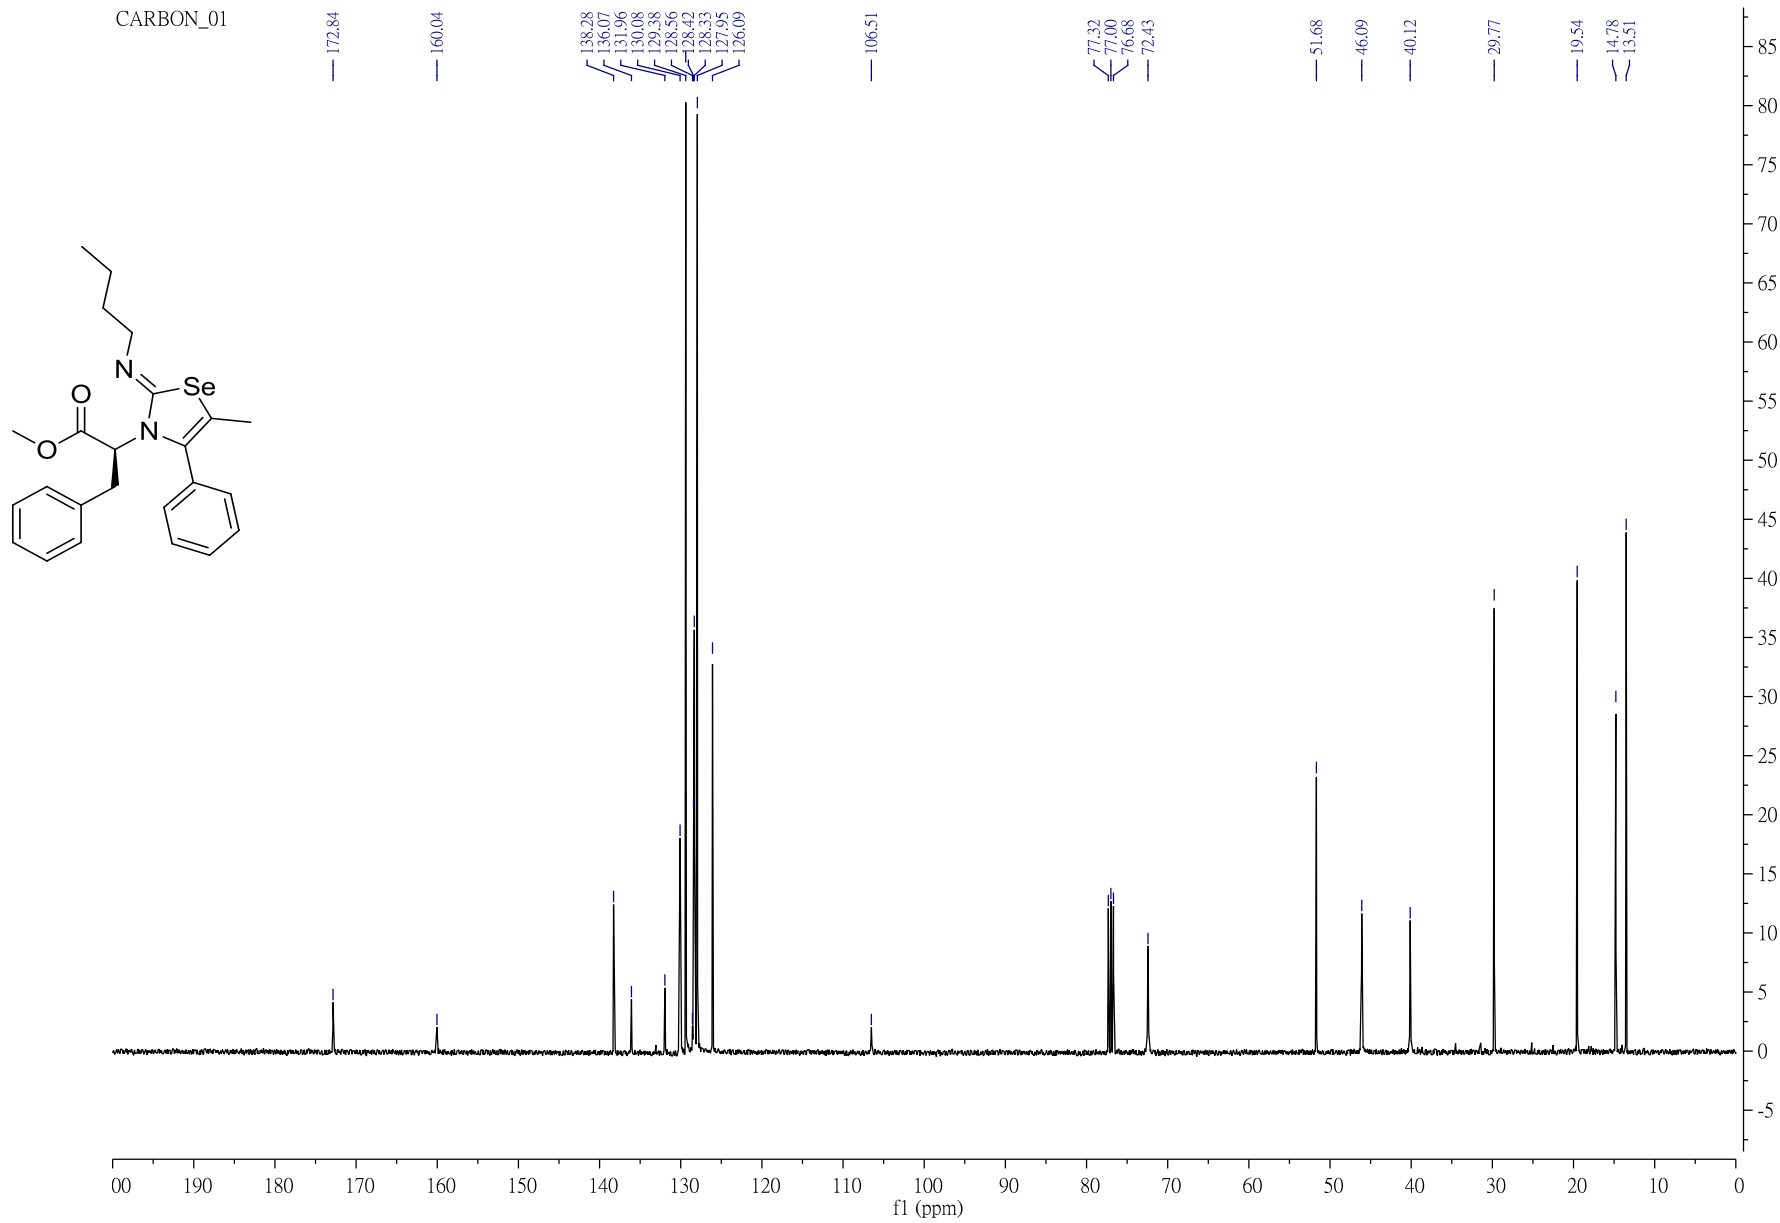

7c C<sup>13</sup>NMR

S138

Chang705701

20140620009 21 (1.438) Cn (Cen,2, 80.00, Ht); Sm (Mn, 2x0.75); Sb (3,20.00 ); Cm (20:24-2:17x3.000)

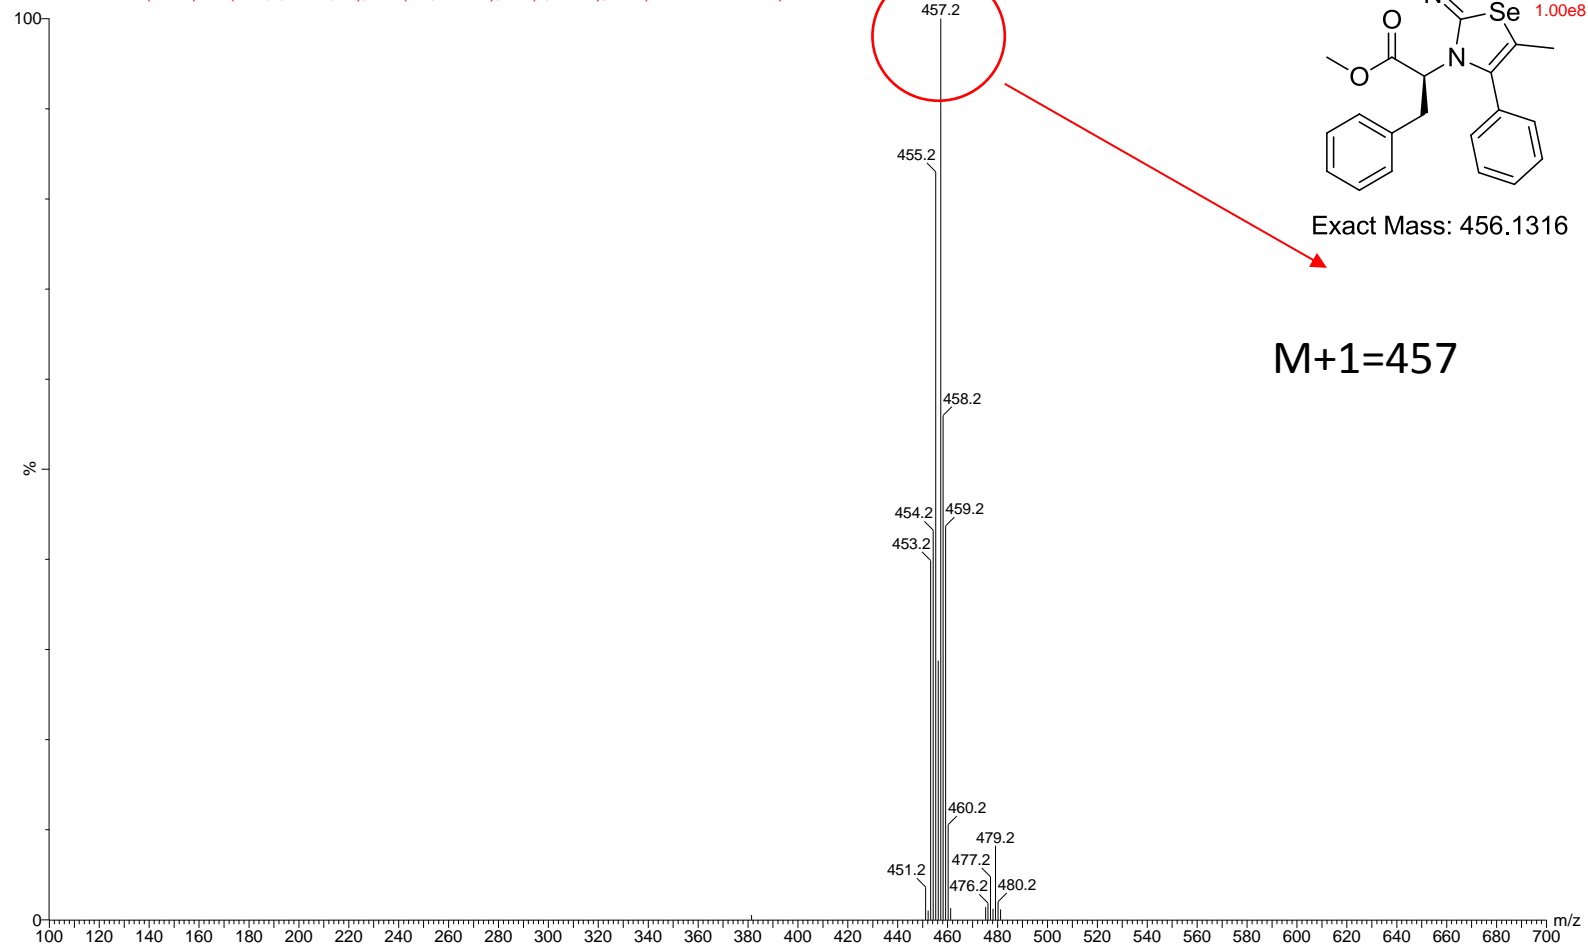

7c LR-MS

S139

# Display Report

## Analysis Info

Analysis Name D:\Data\NCTU SERVICE\Data\20140626\705701 455 ESI+\_GE3\_01\_2028.d  
Method Small molecule.m  
Sample Name 705701 455 ESI+  
Comment

Acquisition Date 6/26/2014 10:18:25 AM

Operator NCTU  
Instrument impact HD 1819696.00164

## Acquisition Parameter

|             |          |                      |          |                  |           |
|-------------|----------|----------------------|----------|------------------|-----------|
| Source Type | ESI      | Ion Polarity         | Positive | Set Nebulizer    | 1.0 Bar   |
| Focus       | Active   | Set Capillary        | 4500 V   | Set Dry Heater   | 200 °C    |
| Scan Begin  | 50 m/z   | Set End Plate Offset | -500 V   | Set Dry Gas      | 6.0 l/min |
| Scan End    | 1500 m/z | Set Charging Voltage | 2000 V   | Set Divert Valve | Waste     |
|             |          | Set Corona           | 0 nA     | Set APCI Heater  | 0 °C      |

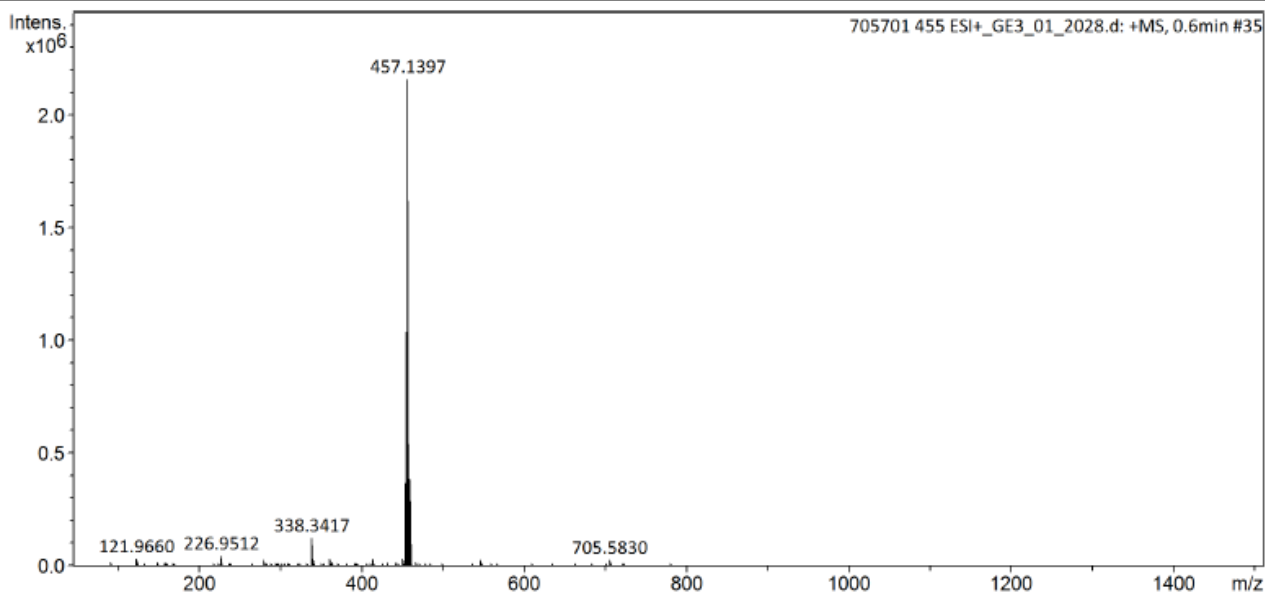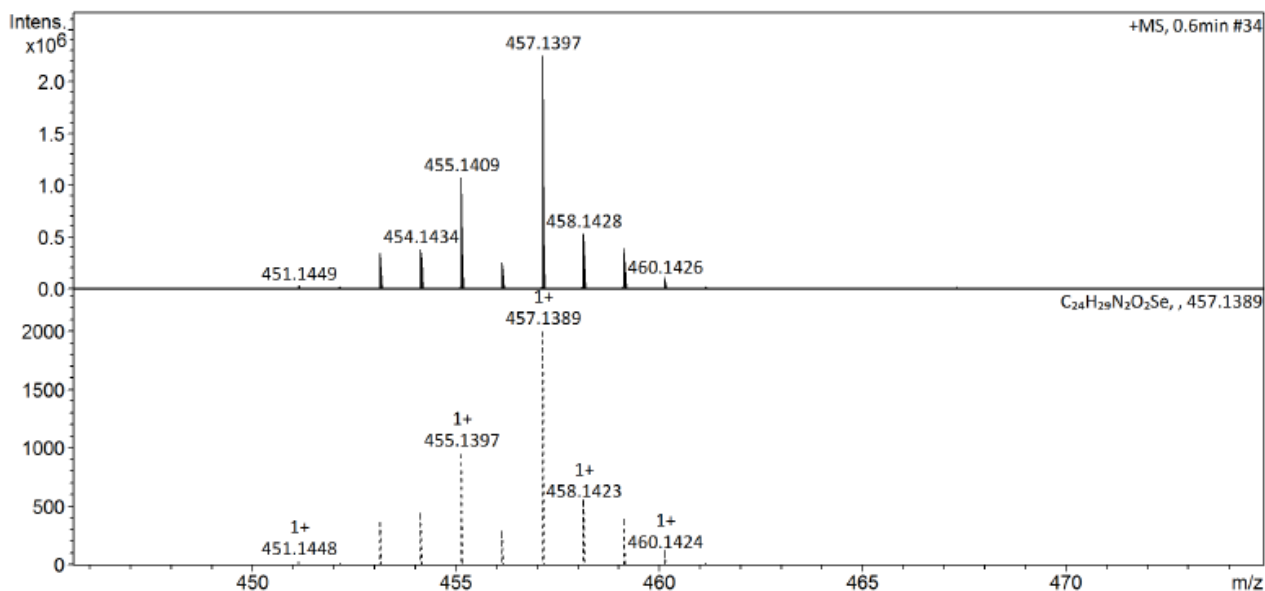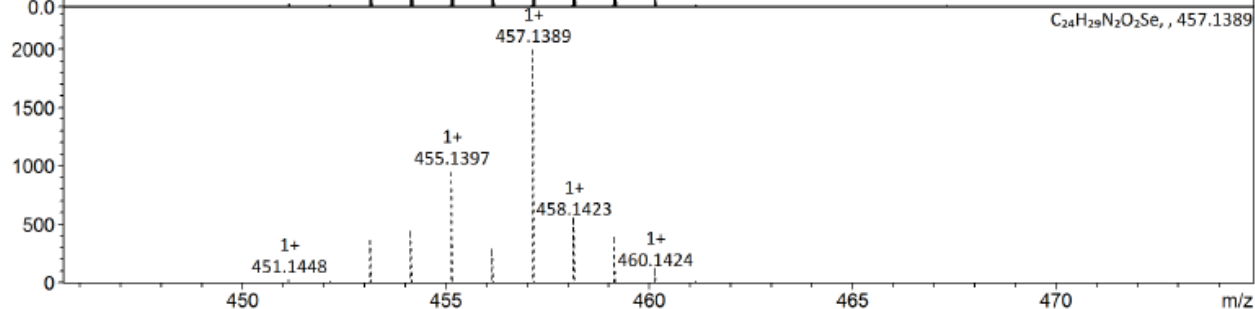

7c HR-MS

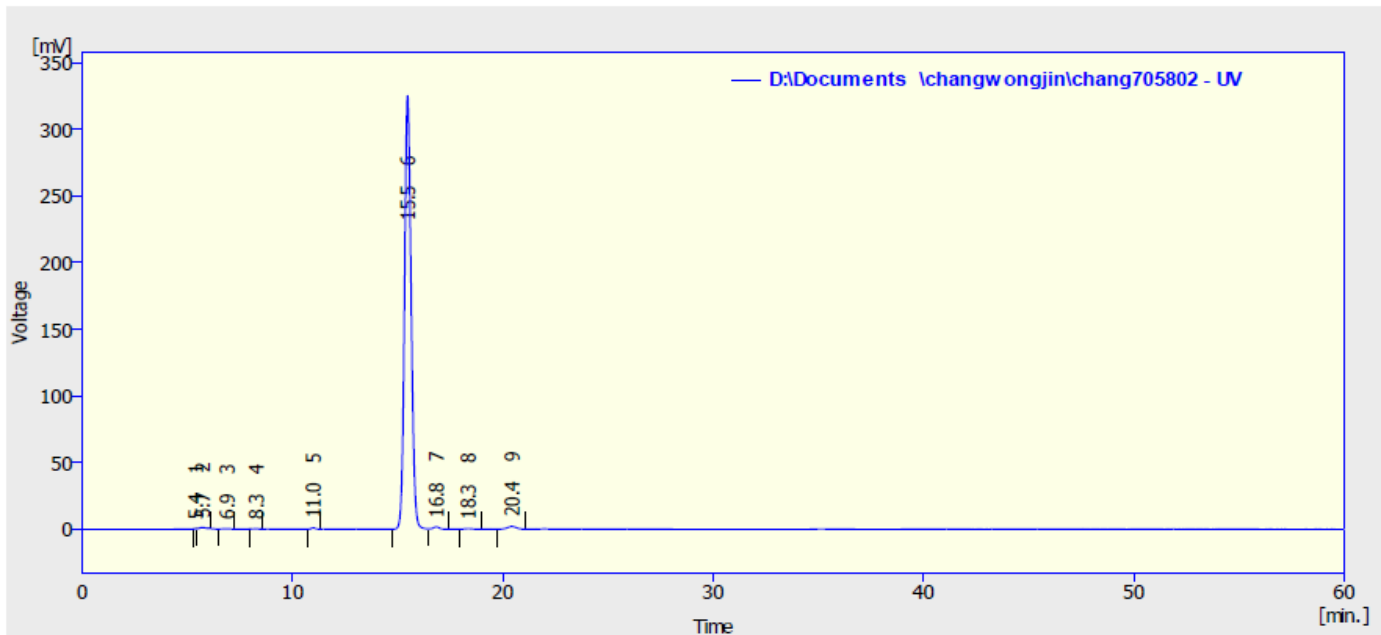

Result Table (Uncal - D:\Documents \changwongjin\chang705802 - UV)

|   | Reten. Time [min] | Area [mV.s] | Height [mV] | Area [%] | Height [%] | W05 [min] |
|---|-------------------|-------------|-------------|----------|------------|-----------|
| 1 | 5.392             | 2.026       | 0.345       | 0.0      | 0.1        | 0.10      |
| 2 | 5.724             | 18.635      | 0.939       | 0.3      | 0.3        | 0.33      |
| 3 | 6.896             | 5.986       | 0.261       | 0.1      | 0.1        | 0.39      |
| 4 | 8.264             | 4.579       | 0.260       | 0.1      | 0.1        | 0.29      |
| 5 | 10.988            | 11.450      | 0.916       | 0.2      | 0.3        | 0.20      |
| 6 | 15.468            | 7098.171    | 324.964     | 98.0     | 97.9       | 0.34      |
| 7 | 16.840            | 34.370      | 1.693       | 0.5      | 0.5        | 0.31      |
| 8 | 18.348            | 9.593       | 0.407       | 0.1      | 0.1        | 0.37      |
| 9 | 20.436            | 58.700      | 2.012       | 0.8      | 0.6        | 0.46      |
|   | Total             | 7243.511    | 331.798     | 100.0    | 100.0      |           |

### 7c chiral HPLC

SAMPLE : \_\_\_\_\_  
 ID # : 007  
 LAMP λ : 589 nm  
 CONC : 0.04000 g/ml  
 CELL LG: 010 mm  
 TEMP CORR: +0.00037  
 INTERVAL: 1 min

SPECIFIC ROTATION [α]  
 COUNT [α](°) TEMP(°C)  
 01 - 80.7502 19.3  
 02 - 81.0002 19.3  
 03 - 80.8752 19.4  
 04 - 81.1252 19.4  
 05 - 81.1252 19.4  
 06 - 81.1252 19.4  
 07 - 81.0002 19.4  
 08 - 81.3752 19.4  
 09 - 81.5002 19.4  
 10 - 81.8752 19.4

MEAN = - 81.1752°  
 σ(N-1) = 0.32913°  
 C. V. = - 0.40546%

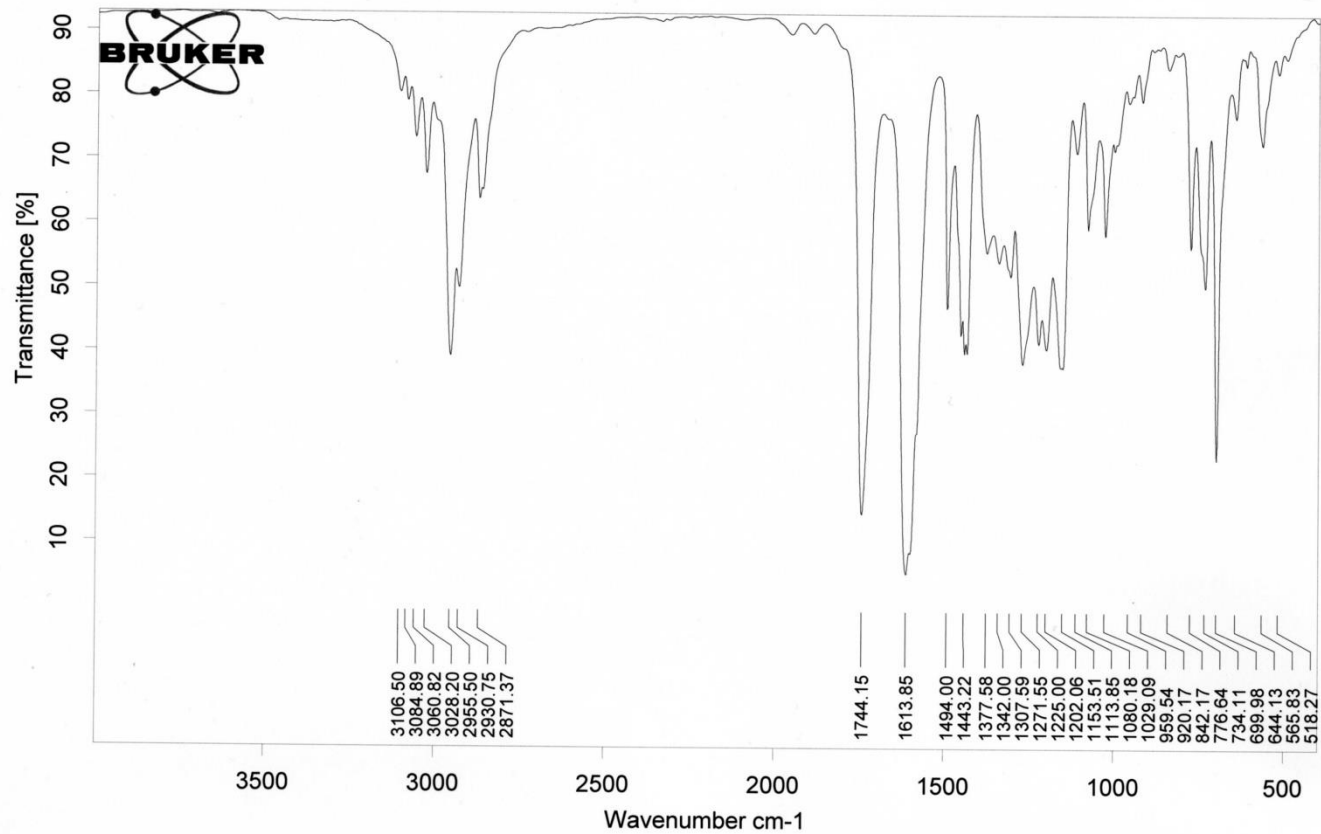

D:\temp-files\FTIR files\201501\20150121\MIR\_TR\_DTGS\_blank KBr\_chang705801.0.dpt

7c FT-IR

PROTON\_01

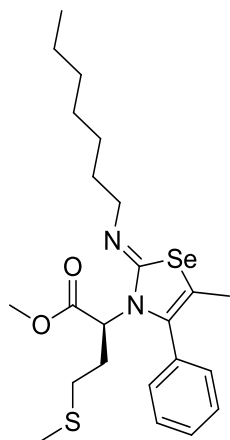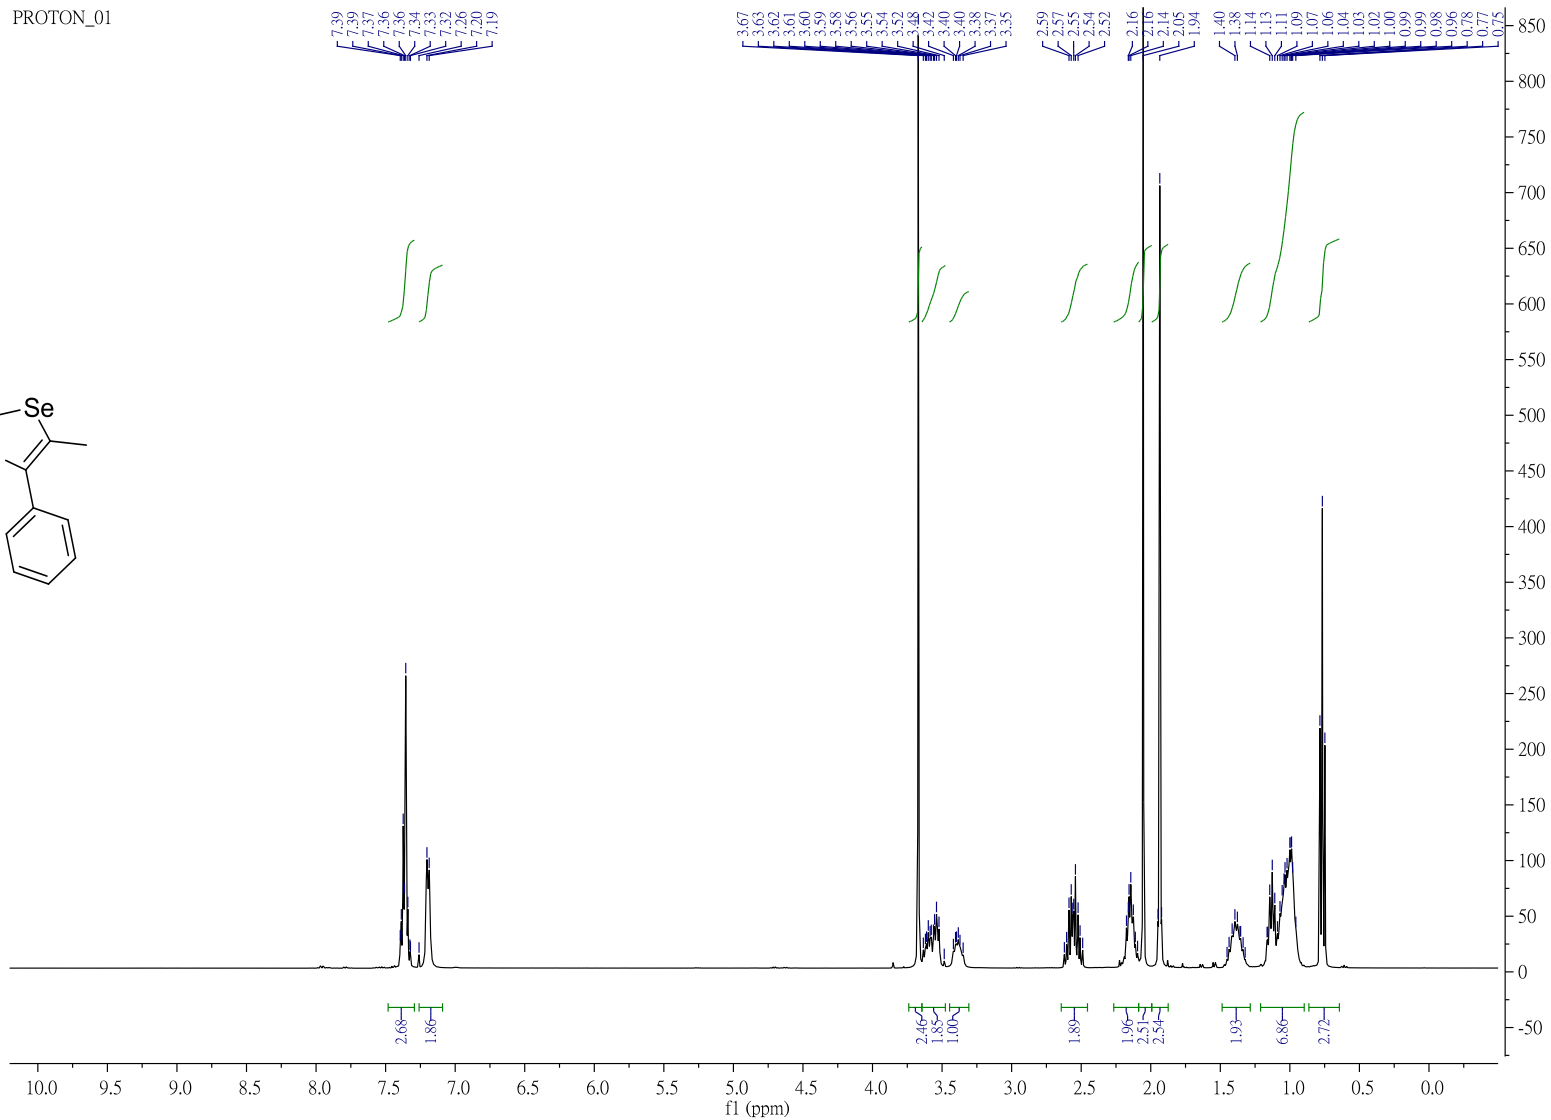

7d <sup>1</sup>H NMR

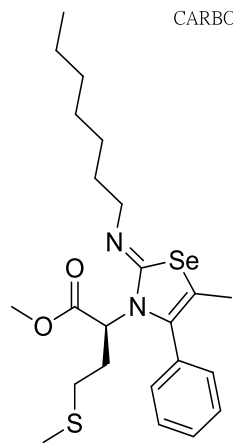

CARBON\_01

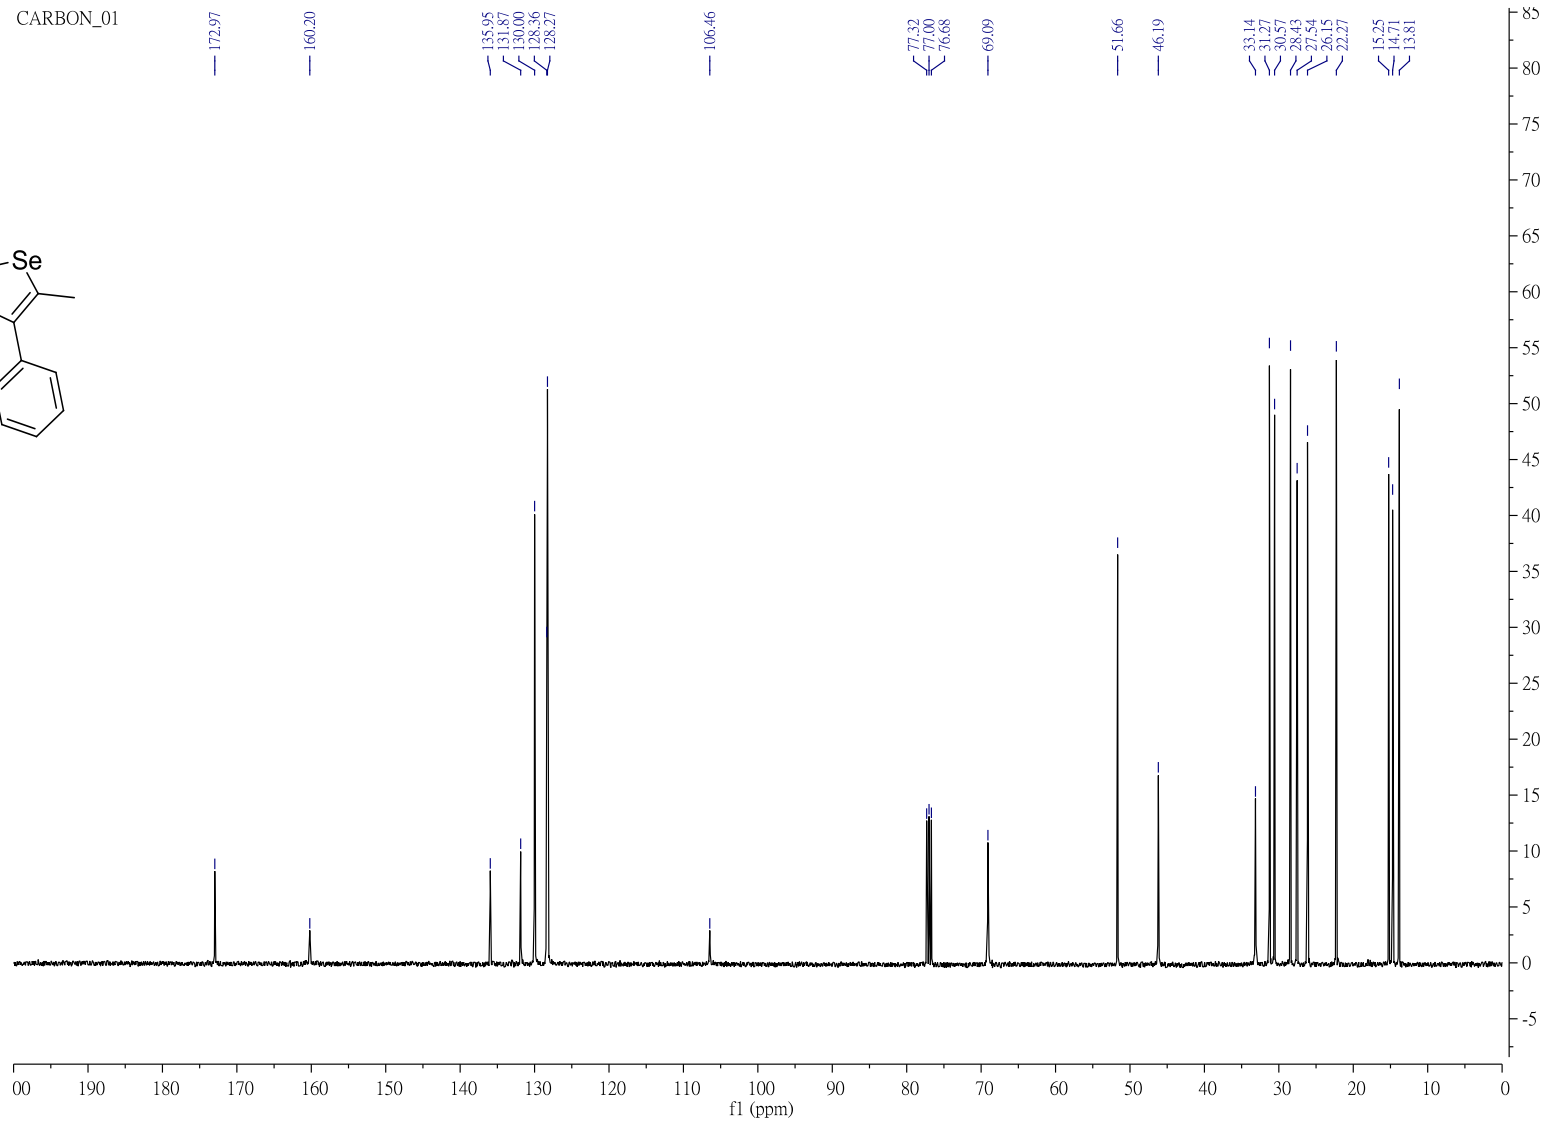

7d  $C^{13}$  NMR

S144



chang705201

2014061006 39 (2.671) Cn (Cen,2, 80.00, Ht); Sm (Mn, 2x0.75); Sb (3,60.00); Cm (26:39-8:23x3.000)

Scan ES+  
1.11e8

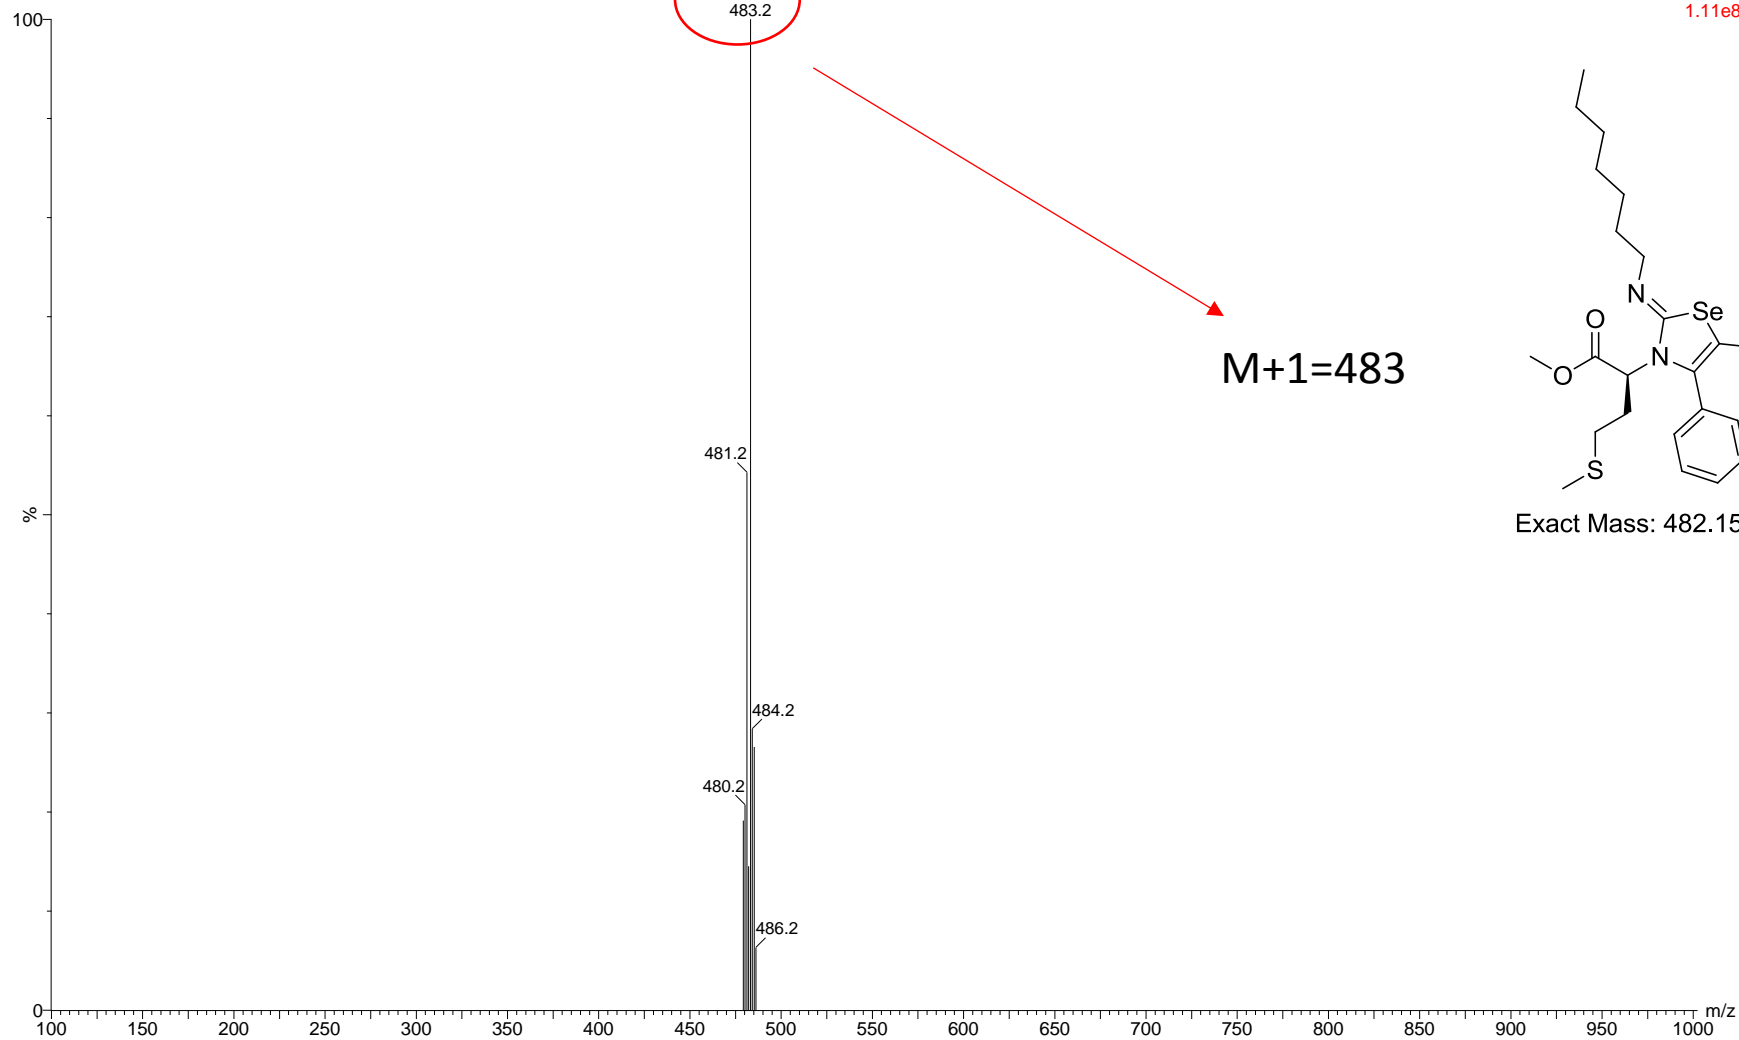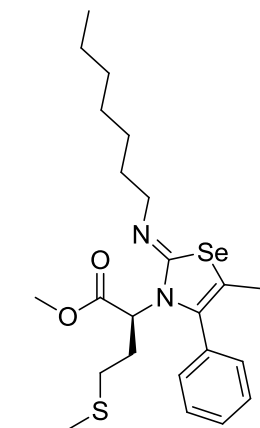

Exact Mass: 482.1506

7d LR-MS

S145

# Display Report

## Analysis Info

Analysis Name D:\Data\NCTU SERVICE\Data\20140626\705201 481 ESI+\_GE5\_01\_2030.d  
Method Small molecule.m  
Sample Name 705201 481 ESI+  
Comment

Acquisition Date 6/26/2014 10:27:01 AM

Operator NCTU  
Instrument impact HD 1819696.00164

## Acquisition Parameter

|             |          |                      |          |                  |           |
|-------------|----------|----------------------|----------|------------------|-----------|
| Source Type | ESI      | Ion Polarity         | Positive | Set Nebulizer    | 1.0 Bar   |
| Focus       | Active   | Set Capillary        | 4500 V   | Set Dry Heater   | 200 °C    |
| Scan Begin  | 50 m/z   | Set End Plate Offset | -500 V   | Set Dry Gas      | 6.0 l/min |
| Scan End    | 1500 m/z | Set Charging Voltage | 2000 V   | Set Divert Valve | Waste     |
|             |          | Set Corona           | 0 nA     | Set APCI Heater  | 0 °C      |

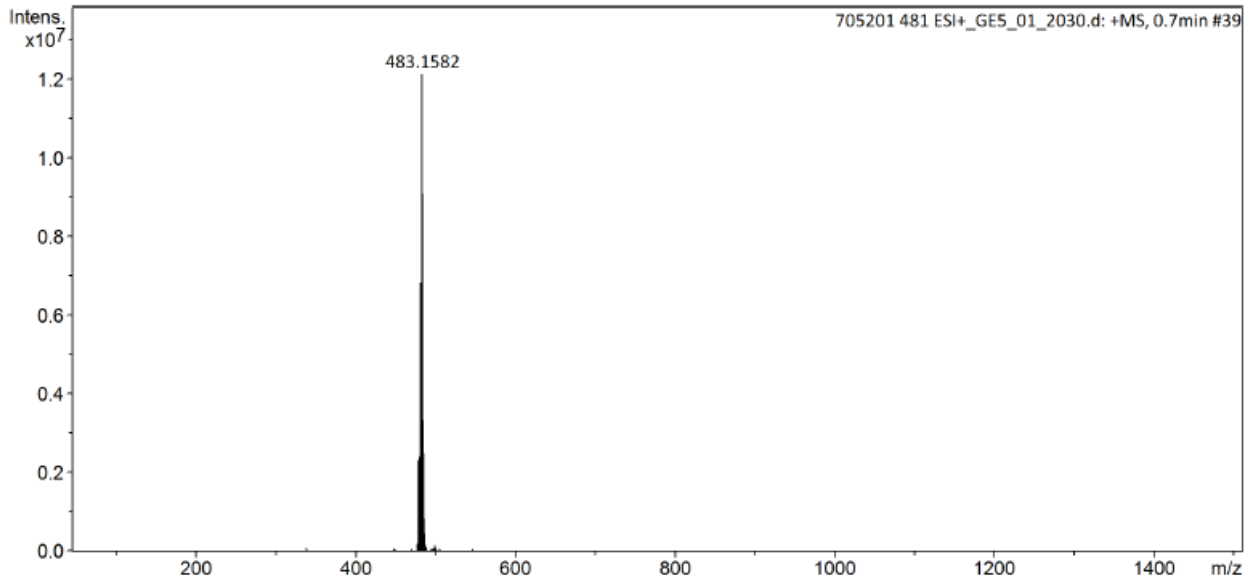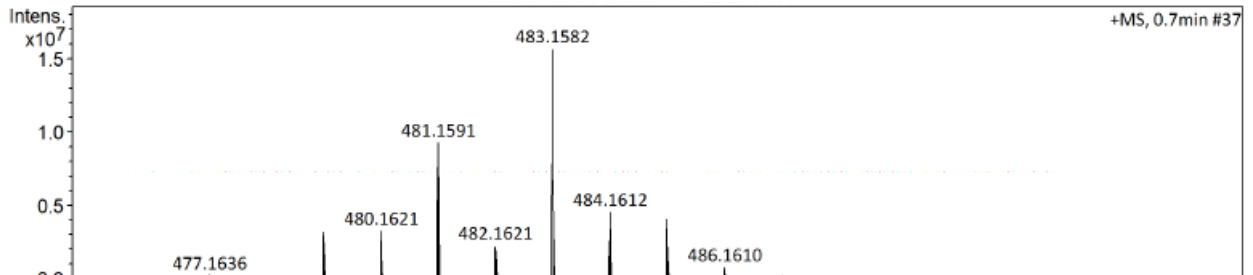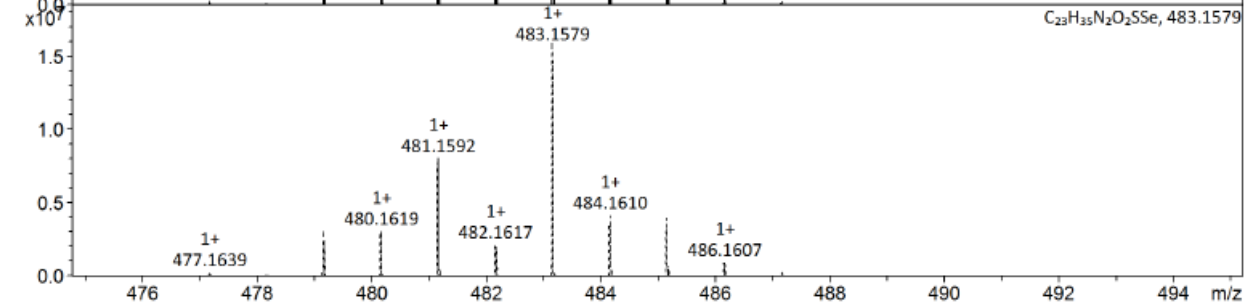

7d HR-MS

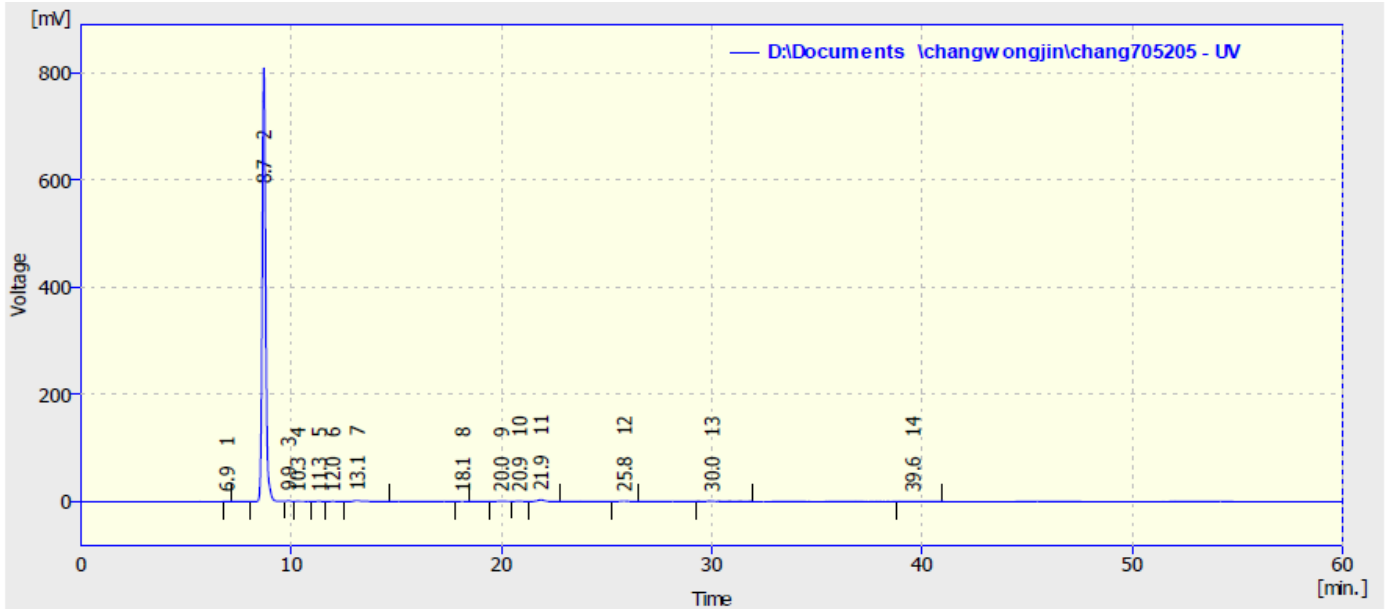

Result Table (Uncal - D:\Documents \changwongjin\chang705205 - UV)

|    | Reten. Time [min] | Area [mV.s] | Height [mV] | Area [%] | Height [%] |
|----|-------------------|-------------|-------------|----------|------------|
| 1  | 6.928             | 3.283       | 0.369       | 0.0      | 0.0        |
| 2  | 8.696             | 9183.891    | 808.124     | 96.0     | 98.3       |
| 3  | 9.868             | 25.468      | 1.750       | 0.3      | 0.2        |
| 4  | 10.304            | 22.994      | 0.897       | 0.2      | 0.1        |
| 5  | 11.316            | 14.248      | 0.802       | 0.1      | 0.1        |
| 6  | 11.984            | 11.135      | 0.679       | 0.1      | 0.1        |
| 7  | 13.136            | 70.963      | 2.142       | 0.7      | 0.3        |
| 8  | 18.148            | 8.988       | 0.462       | 0.1      | 0.1        |
| 9  | 19.996            | 28.385      | 0.825       | 0.3      | 0.1        |
| 10 | 20.856            | 21.280      | 0.858       | 0.2      | 0.1        |
| 11 | 21.876            | 82.160      | 3.243       | 0.9      | 0.4        |
| 12 | 25.840            | 31.916      | 1.111       | 0.3      | 0.1        |
| 13 | 30.000            | 39.641      | 0.738       | 0.4      | 0.1        |
| 14 | 39.556            | 24.507      | 0.350       | 0.3      | 0.0        |
|    | Total             | 9568.859    | 822.351     | 100.0    | 100.0      |

### 7d chiral HPLC

SAMPLE : \_\_\_\_\_  
 ID # : 012  
 LAMP  $\lambda$  : 589 nm  
 CONC : 0.03000 g/ml  
 CELL LG: 010 mm  
 TEMP CORR: +0.00037  
 INTERVAL: 1 min

SPECIFIC ROTATION [α]  
 COUNT [α](°) TEMP(°C)  
 01 - 23.3332 20.2  
 02 - 23.4999 20.2  
 03 - 23.6665 20.2  
 04 - 23.4999 20.2  
 05 - 23.6665 20.2  
 06 - 23.9999 20.2  
 07 - 24.1665 20.2  
 08 - 24.9999 20.2  
 09 - 24.9999 20.2  
 10 - 24.9999 20.2

MEAN = - 24.0832°  
 $\sigma(N-1)$  = 0.67700°  
 C.V. = - 2.8111%

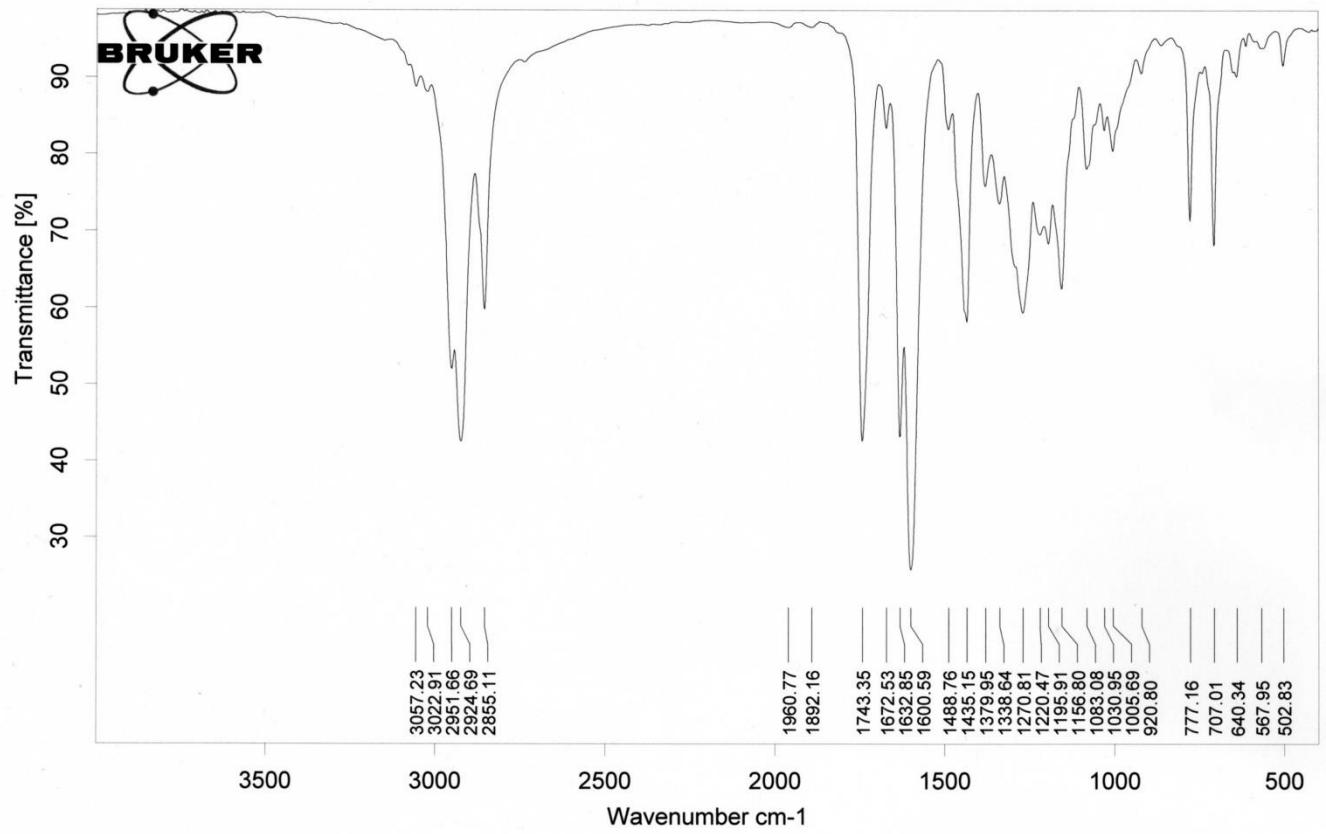

D:\temp-files\FTIR files\201501\20150121\MIR\_TR\_DTGS\_blank KBr\_chang705201.0.dpt

7d FT-IR

PROTON\_01

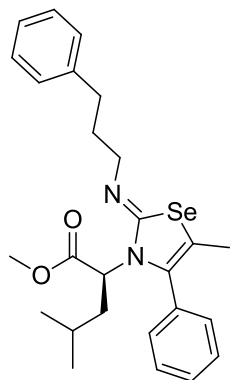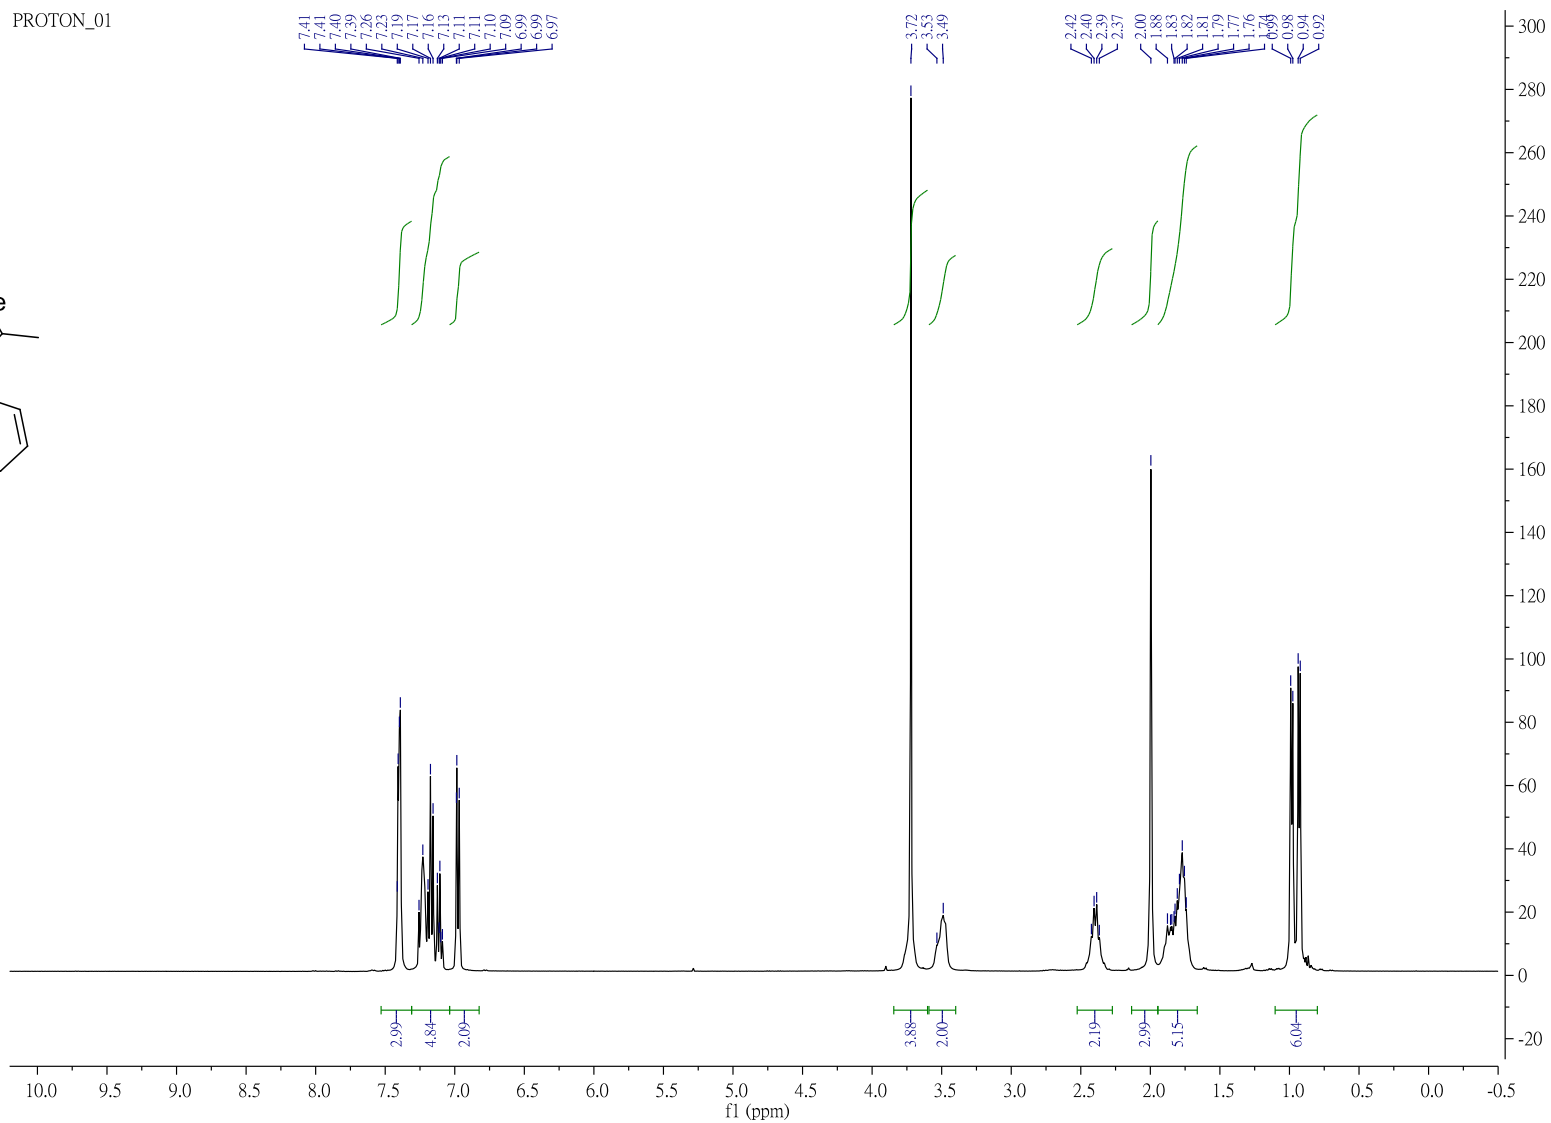

7e H<sup>1</sup>NMR

S149

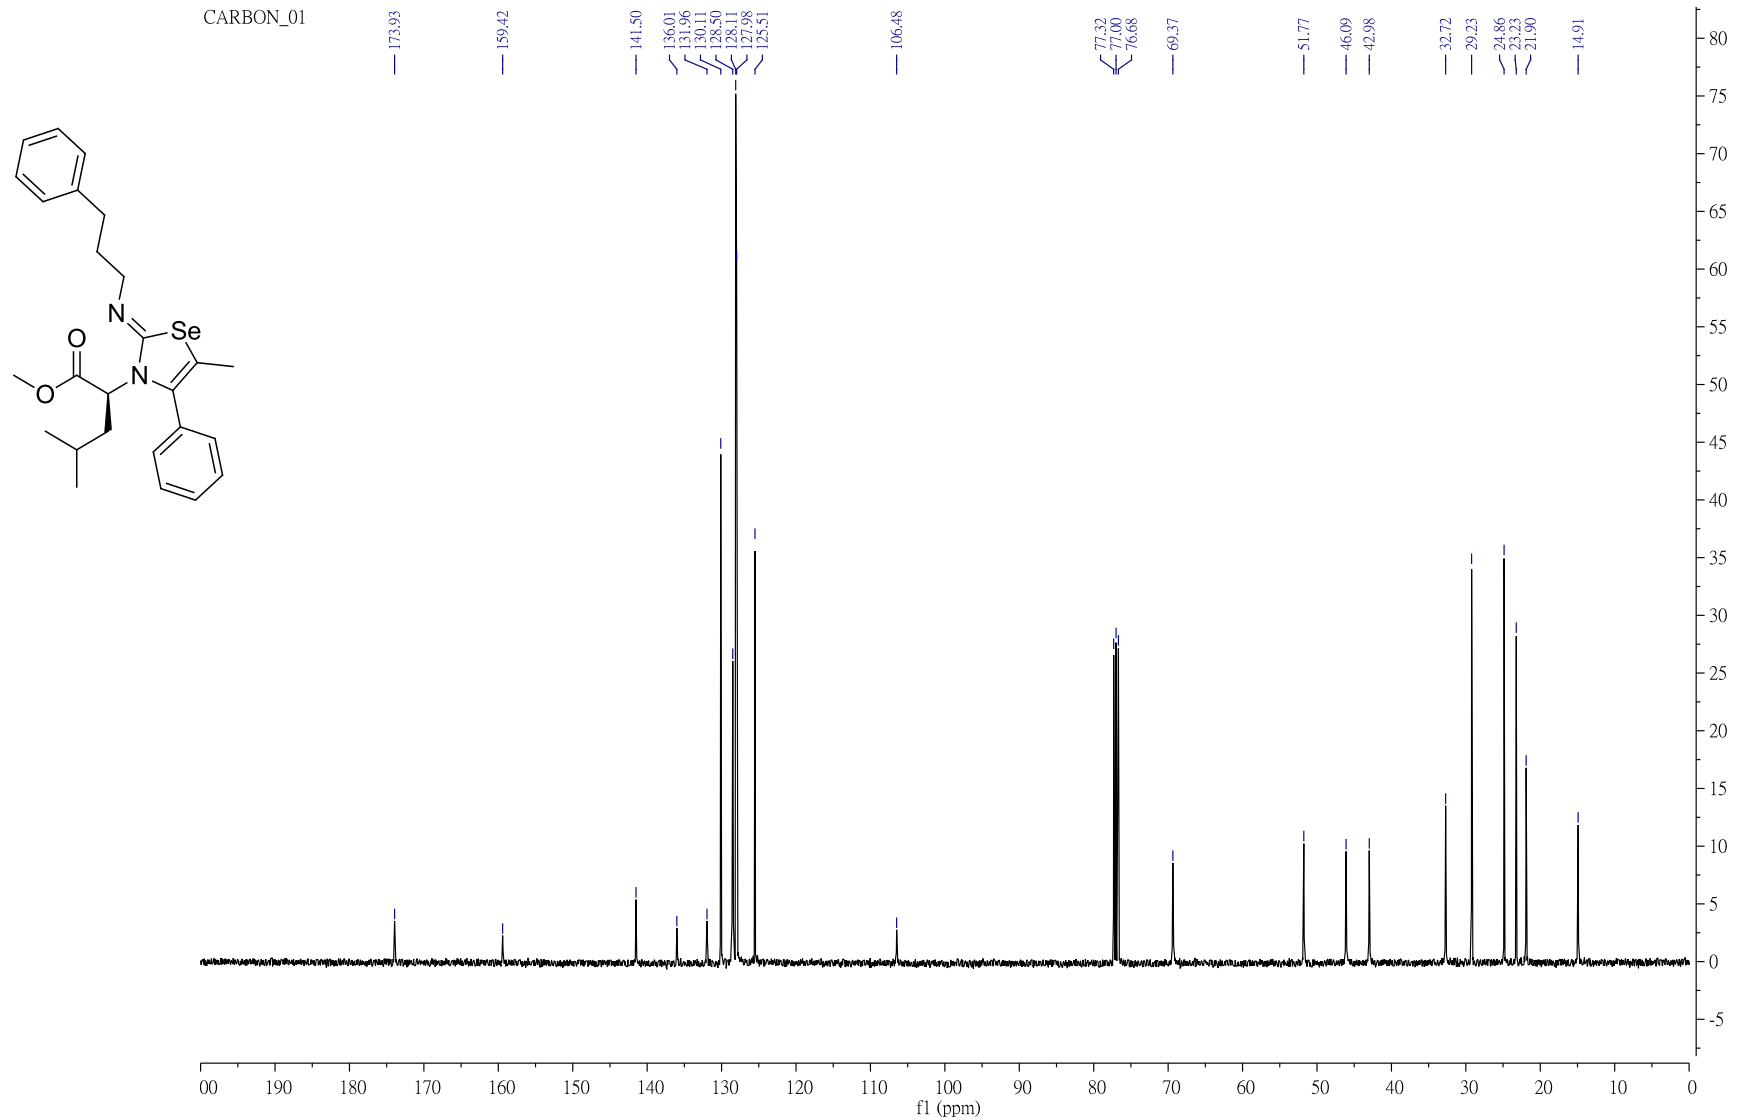

7e C<sup>13</sup>NMR

chang704901

20140530013 20 (1.370) Cn (Cen,2, 80.00, Ht); Sm (Mn, 2x0.75); Sb (3,60.00 ); Cm (18:25-1:12x3.000)

Scan ES+  
1.28e8

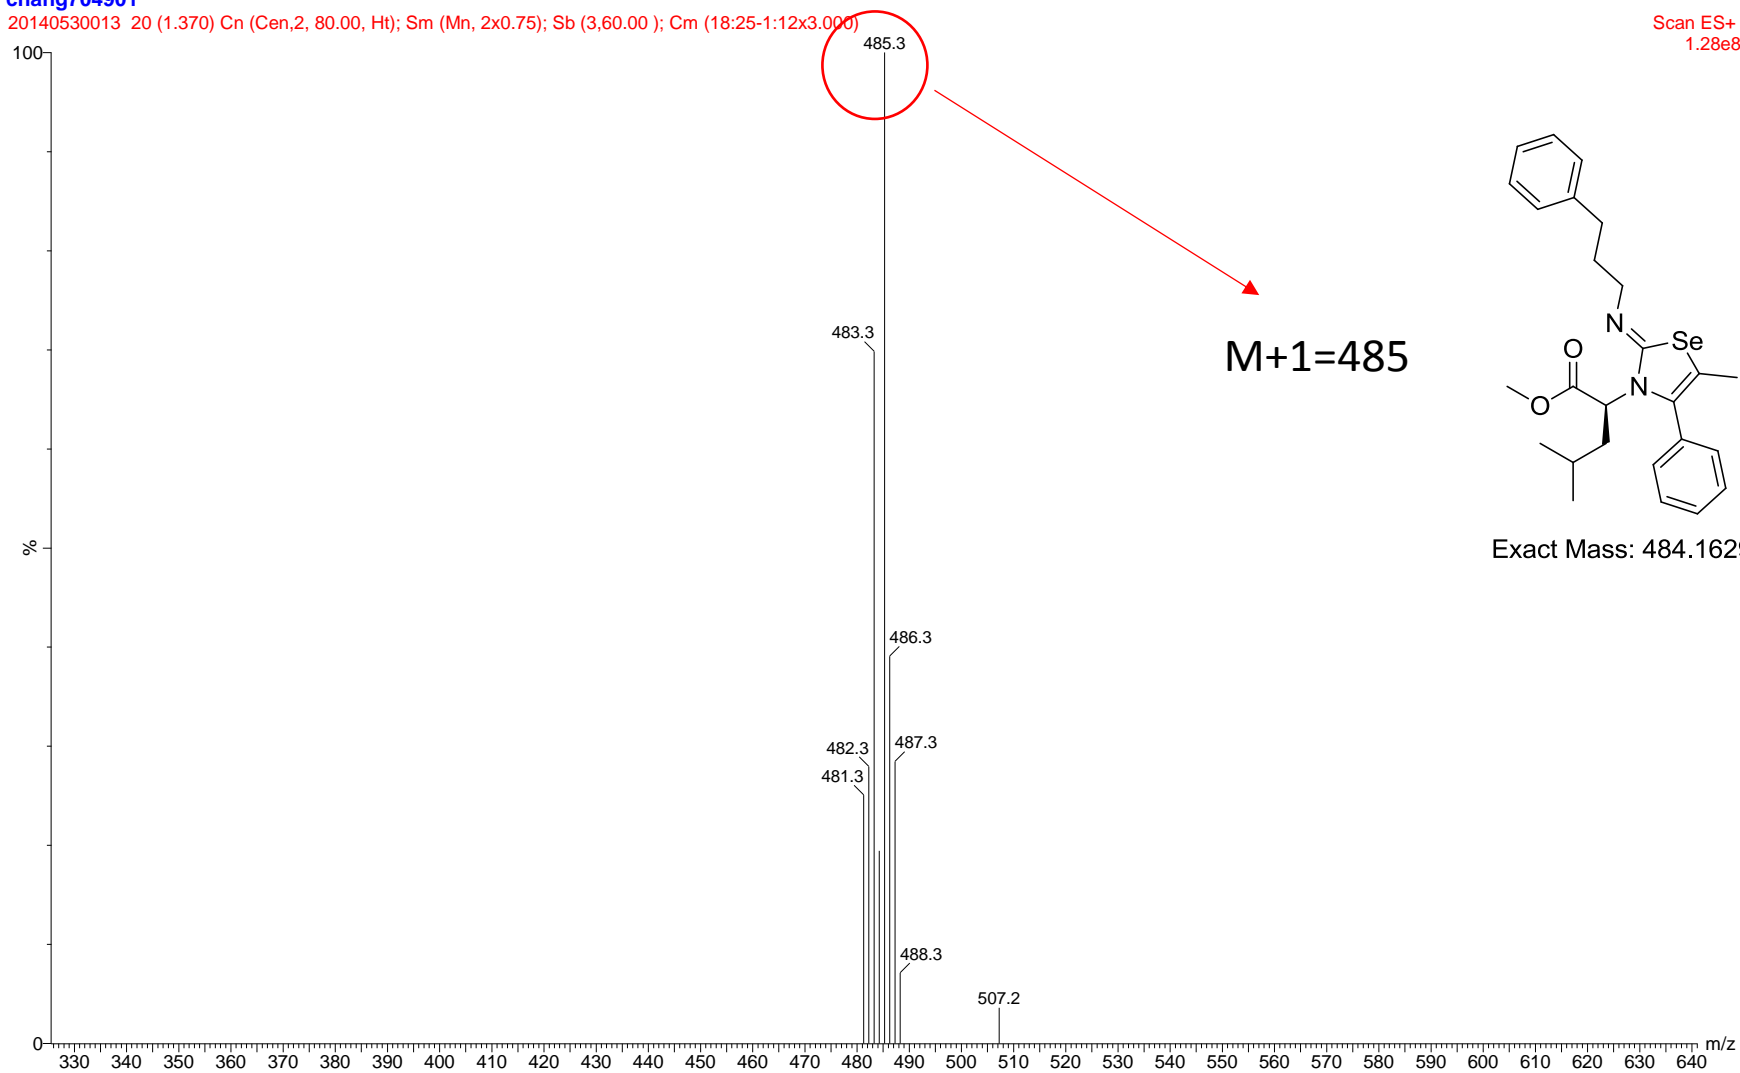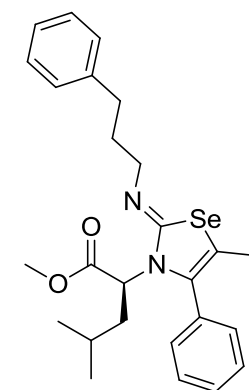

Exact Mass: 484.1629

7e LR-MS

S151

# Display report

## Analysis Info

Analysis Name D:\Data\NCTU SERVICE\Data\20140909\704901 ESI+\_RD6\_01\_2943.d  
Method Small molecule.m  
Sample Name 704901 ESI+  
Comment

Acquisition Date 9/9/2014 2:08:36 PM

Operator NCTU  
Instrument impact HD 1819696.00164

## Acquisition Parameter

|             |          |                      |          |                  |           |
|-------------|----------|----------------------|----------|------------------|-----------|
| Source Type | ESI      | Ion Polarity         | Positive | Set Nebulizer    | 1.0 Bar   |
| Focus       | Active   | Set Capillary        | 4500 V   | Set Dry Heater   | 200 °C    |
| Scan Begin  | 50 m/z   | Set End Plate Offset | -500 V   | Set Dry Gas      | 6.0 l/min |
| Scan End    | 1500 m/z | Set Charging Voltage | 2000 V   | Set Divert Valve | Waste     |
|             |          | Set Corona           | 0 nA     | Set APCI Heater  | 0 °C      |

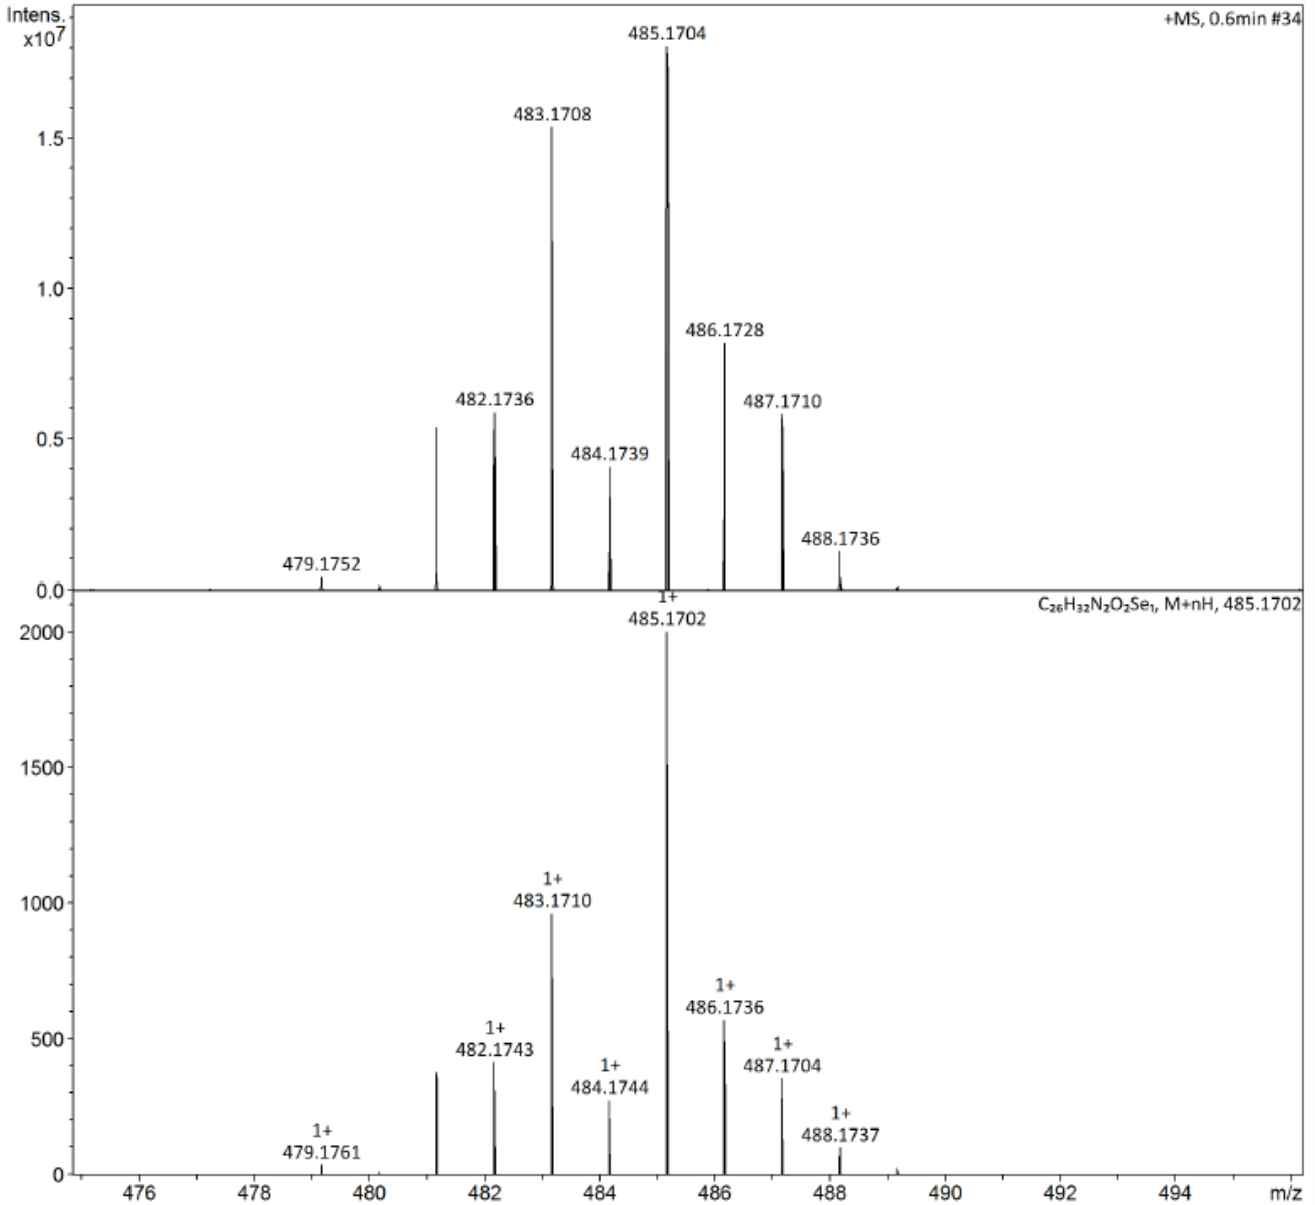

7e HR-MS



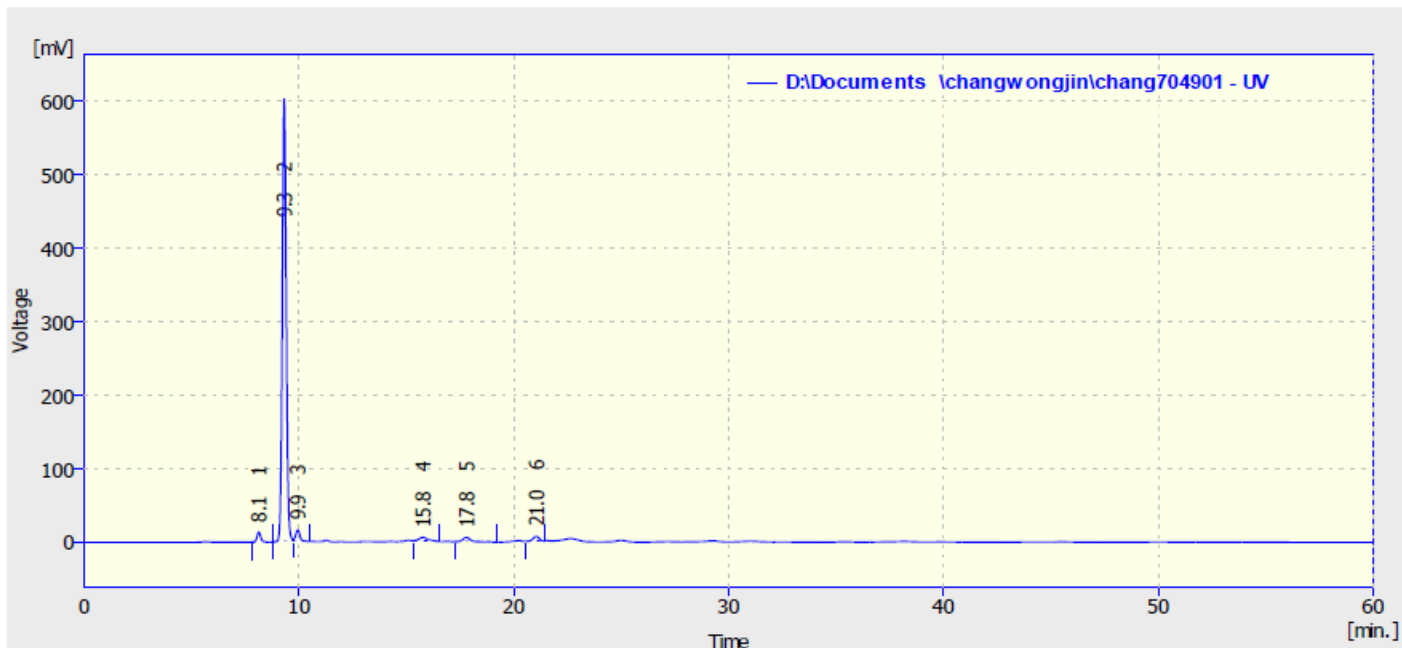

Result Table (Uncal - D:\Documents \changwongjin\chang704901 - UV)

|   | Reten. Time [min] | Area [mV.s] | Height [mV] | Area [%] | Height [%] |
|---|-------------------|-------------|-------------|----------|------------|
| 1 | 8.128             | 161.901     | 13.616      | 1.9      | 2.1        |
| 2 | 9.312             | 7724.511    | 602.451     | 90.2     | 92.7       |
| 3 | 9.944             | 236.772     | 16.015      | 2.8      | 2.5        |
| 4 | 15.768            | 150.536     | 5.016       | 1.8      | 0.8        |
| 5 | 17.796            | 151.670     | 6.019       | 1.8      | 0.9        |
| 6 | 21.044            | 136.273     | 6.651       | 1.6      | 1.0        |
|   | Total             | 8561.663    | 649.769     | 100.0    | 100.0      |

### 7e chiral HPLC

SAMPLE : \_\_\_\_\_  
 ID # : 018  
 LAMP λ : 589 nm  
 CONC : 0.04000 g/ml  
 CELL LG: 010 mm  
 TEMP CORR: +0.00037  
 INTERVAL: 1 min

---

SPECIFIC ROTATION [α]  
 COUNT [α] (°) TEMP (°C)

|    |           |      |
|----|-----------|------|
| 01 | - 65.0000 | 20.0 |
| 02 | - 66.2500 | 20.0 |
| 03 | - 66.3750 | 20.0 |
| 04 | - 67.5000 | 20.0 |
| 05 | - 69.2500 | 20.0 |
| 06 | - 69.0000 | 20.0 |
| 07 | - 69.8750 | 20.0 |
| 08 | - 70.1250 | 20.0 |
| 09 | - 71.6250 | 20.0 |
| 10 | - 71.2500 | 20.0 |

---

MEAN = - 68.6250°  
 σ(N-1) = 2.2445°  
 C. V. = - 3.2708%

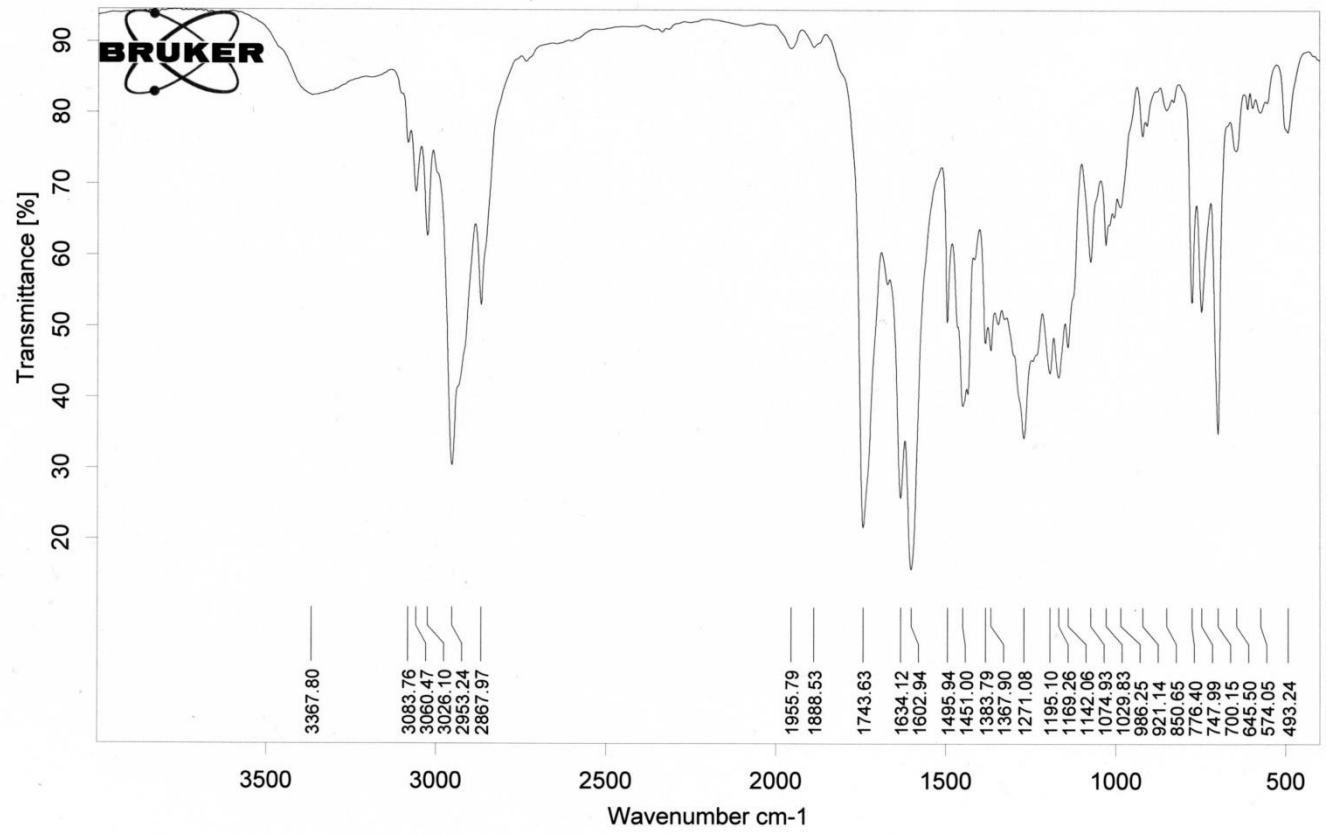

D:\temp-files\FTIR files\201501\20150121\MIR\_TR\_DTGS\_blank KBr\_chang704901.0.dpt

7e FT-IR

PROTON\_01

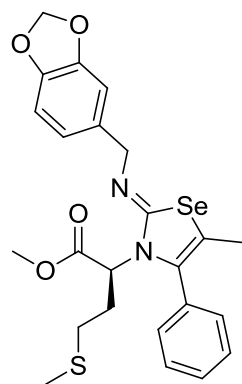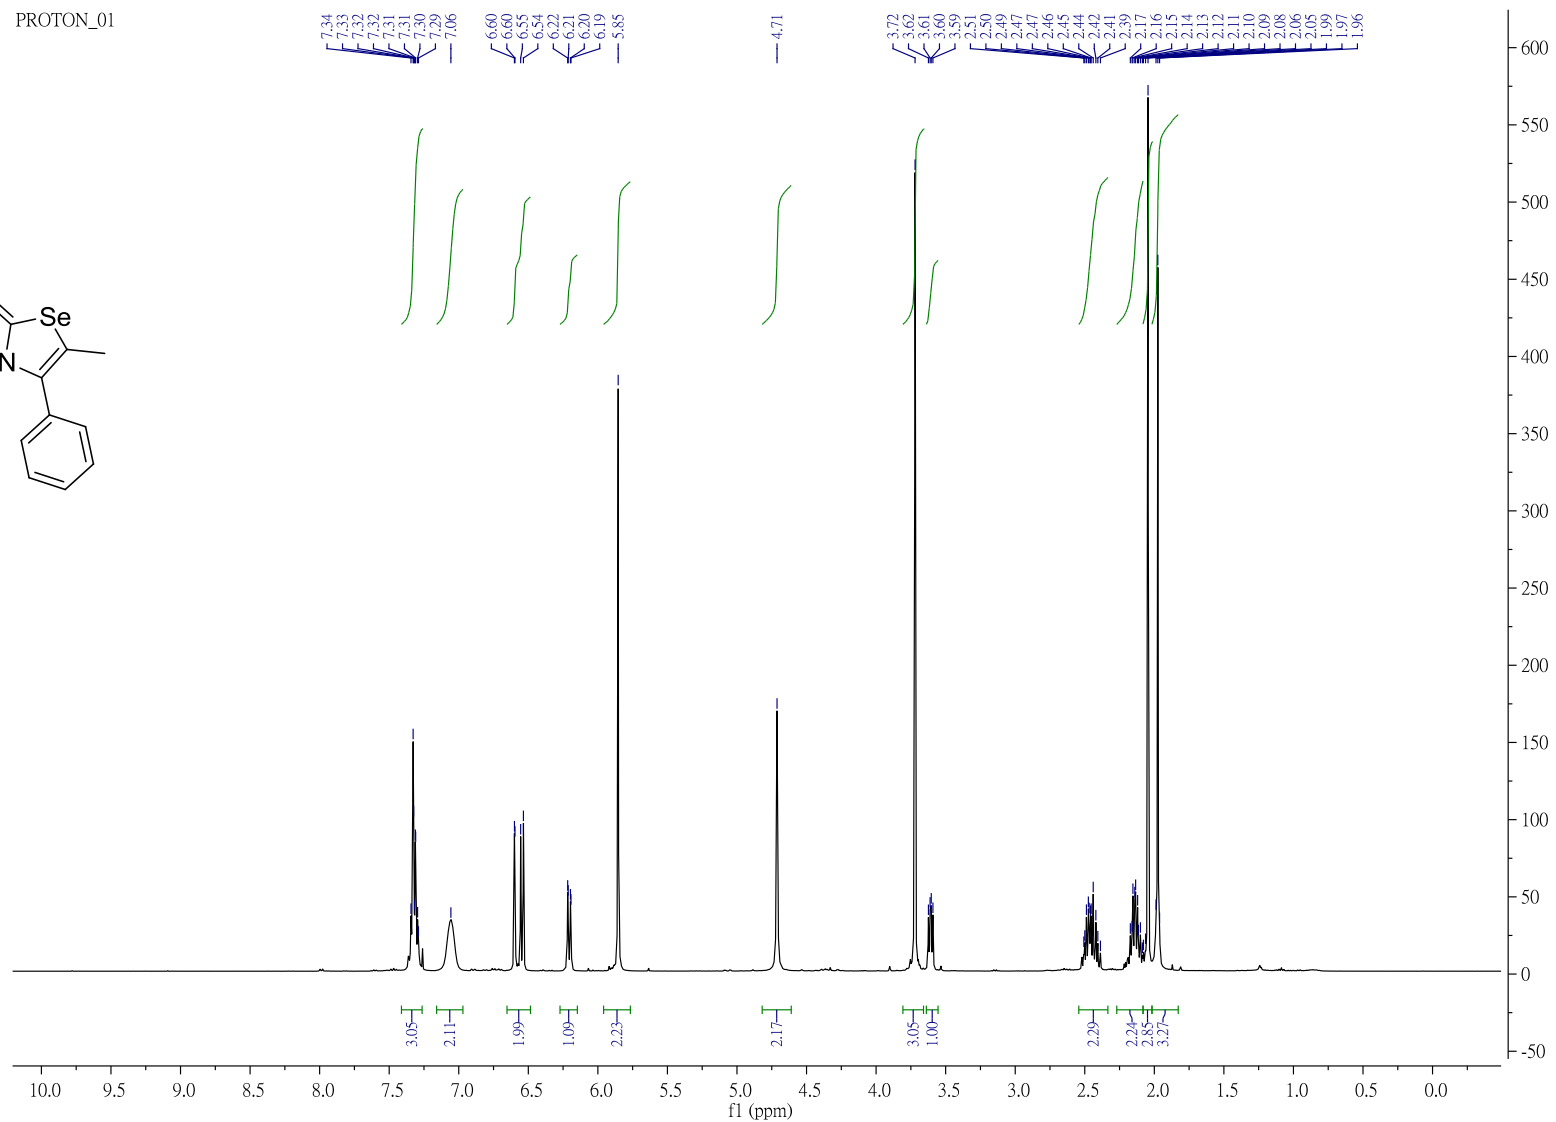

7f <sup>1</sup>H NMR

S155

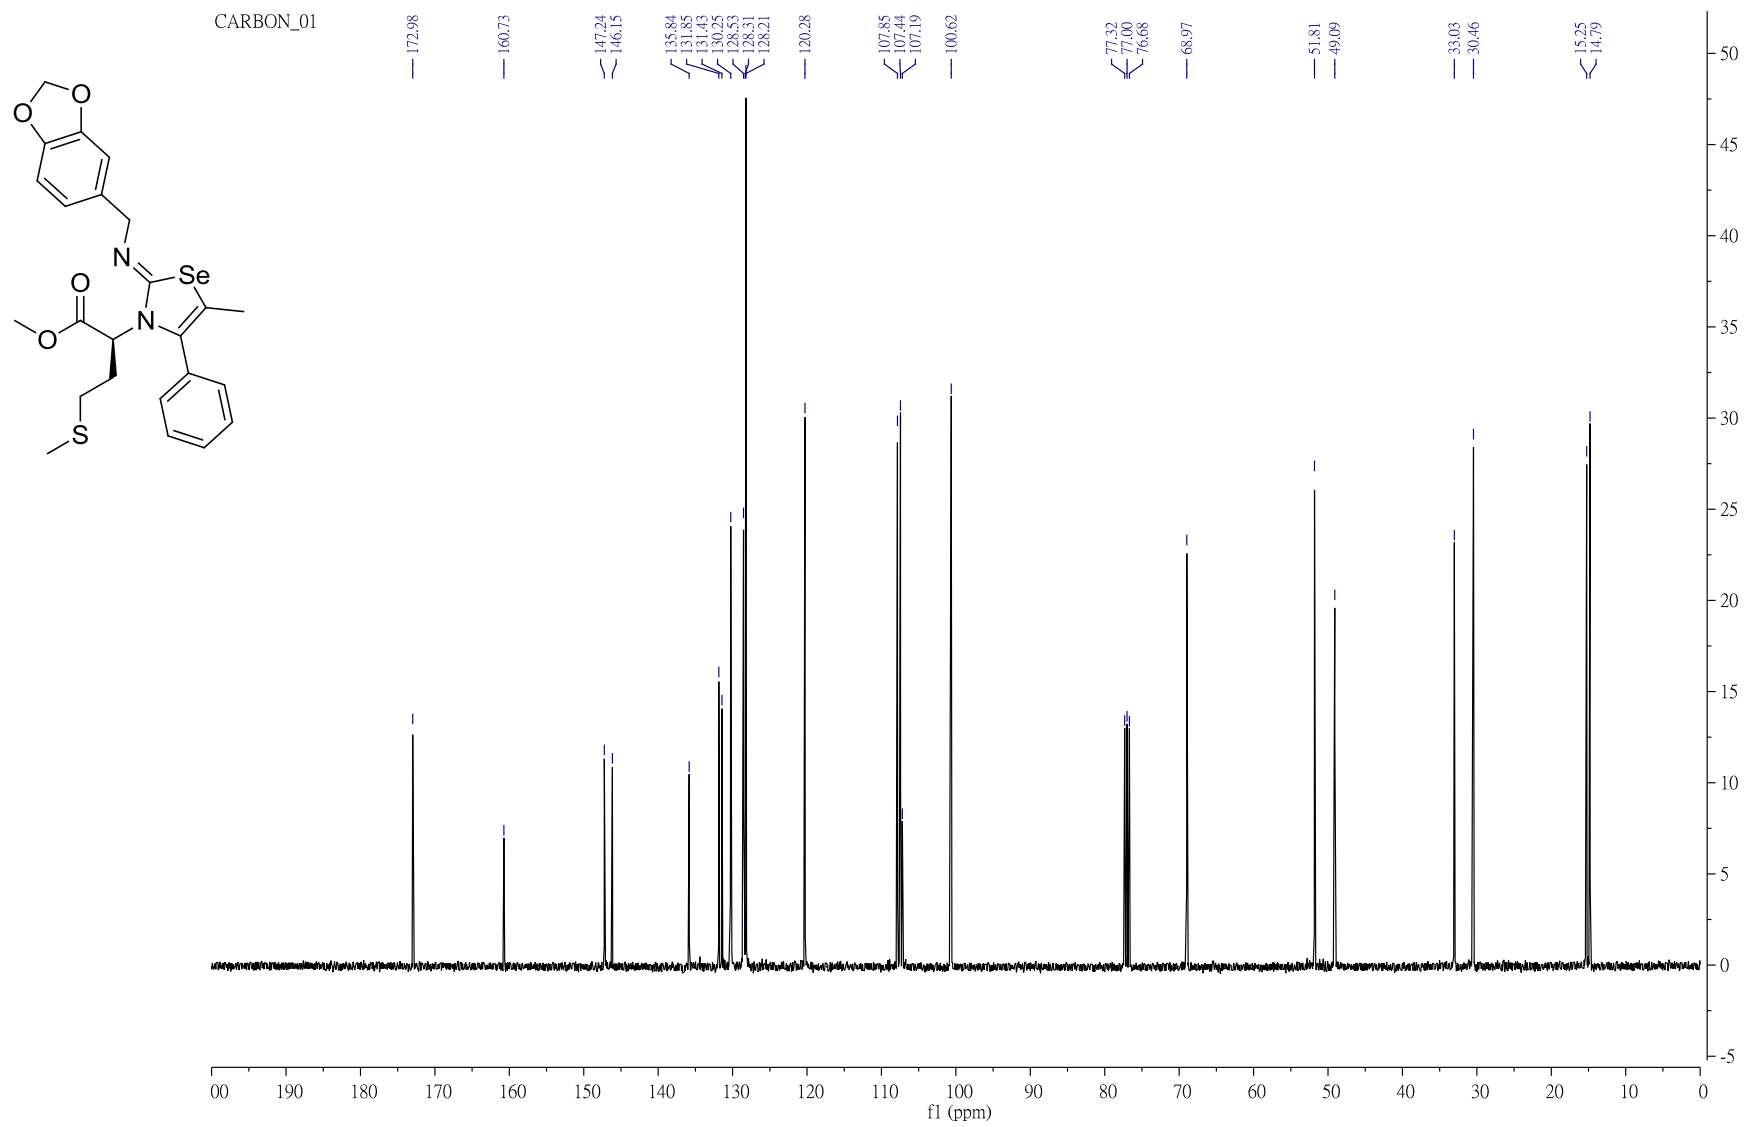

7f C<sup>13</sup>NMR

S156

Print Date: 25 Mar 2014 10:49:07

Scan 20 from c:\service\chiu\20140325\2014-03-25\_chang703001.xms

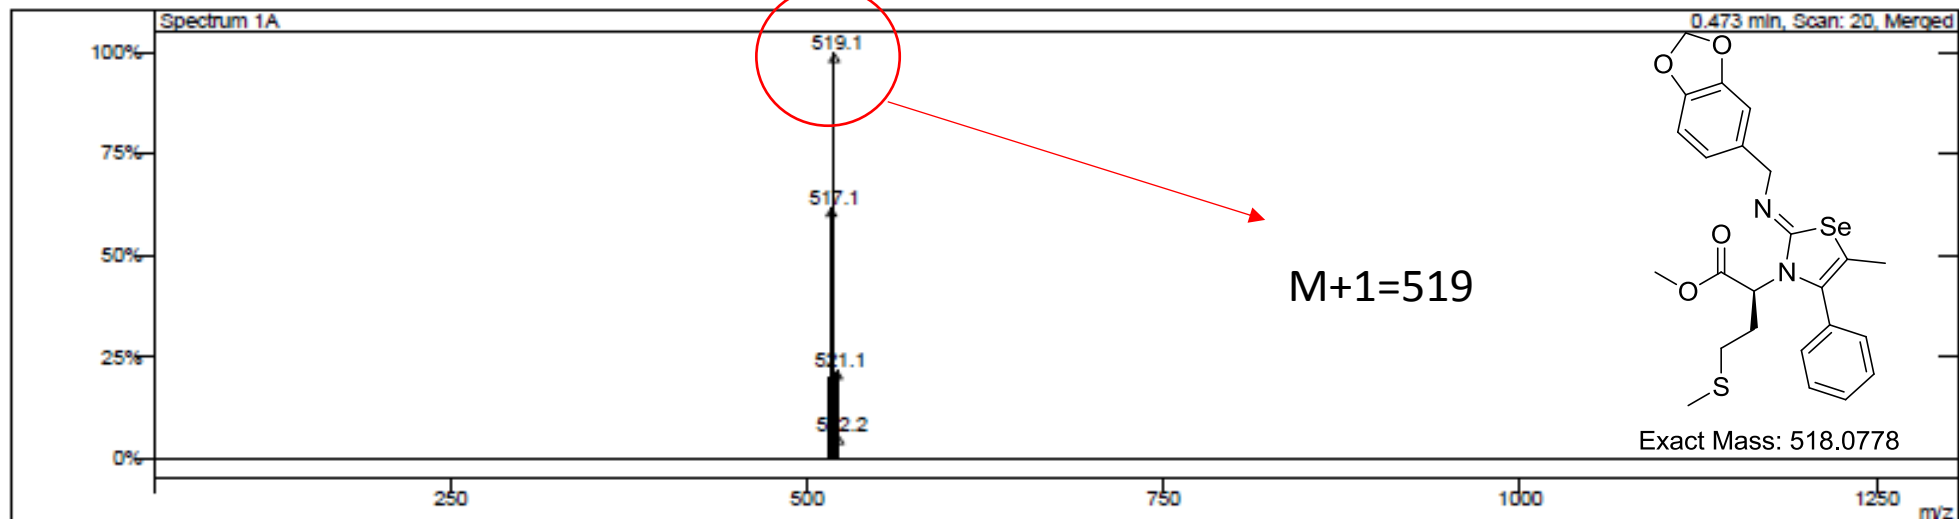

Spectrum from ...ervice\chiu\20140325\2014-03-25\_chang703001.xms  
Scan No: 20, Time: 0.473 minutes  
No averaging. Background corrected.  
Comment: 0.473 min. Scan: 20 Merged RIC: 4712584837  
Pair Count: 8 MW: 0 Formula: None  
CAS No: None Acquired Range: 100.0 - 1250.0 m/z

7f LR-MS

# Display Report

## Analysis Info

Analysis Name D:\Data\NCTU SERVICE\Data\20140626\703001\_553 ESI+\_GD7\_01\_2024.d  
Method Small molecule.m  
Sample Name 703001\_553 ESI+  
Comment

Acquisition Date 6/26/2014 10:01:10 AM

Operator NCTU  
Instrument impact HD 1819696.00164

## Acquisition Parameter

|             |          |                      |          |                  |           |
|-------------|----------|----------------------|----------|------------------|-----------|
| Source Type | ESI      | Ion Polarity         | Positive | Set Nebulizer    | 1.0 Bar   |
| Focus       | Active   | Set Capillary        | 4500 V   | Set Dry Heater   | 200 °C    |
| Scan Begin  | 50 m/z   | Set End Plate Offset | -500 V   | Set Dry Gas      | 6.0 l/min |
| Scan End    | 1500 m/z | Set Charging Voltage | 2000 V   | Set Divert Valve | Waste     |
|             |          | Set Corona           | 0 nA     | Set APCI Heater  | 0 °C      |

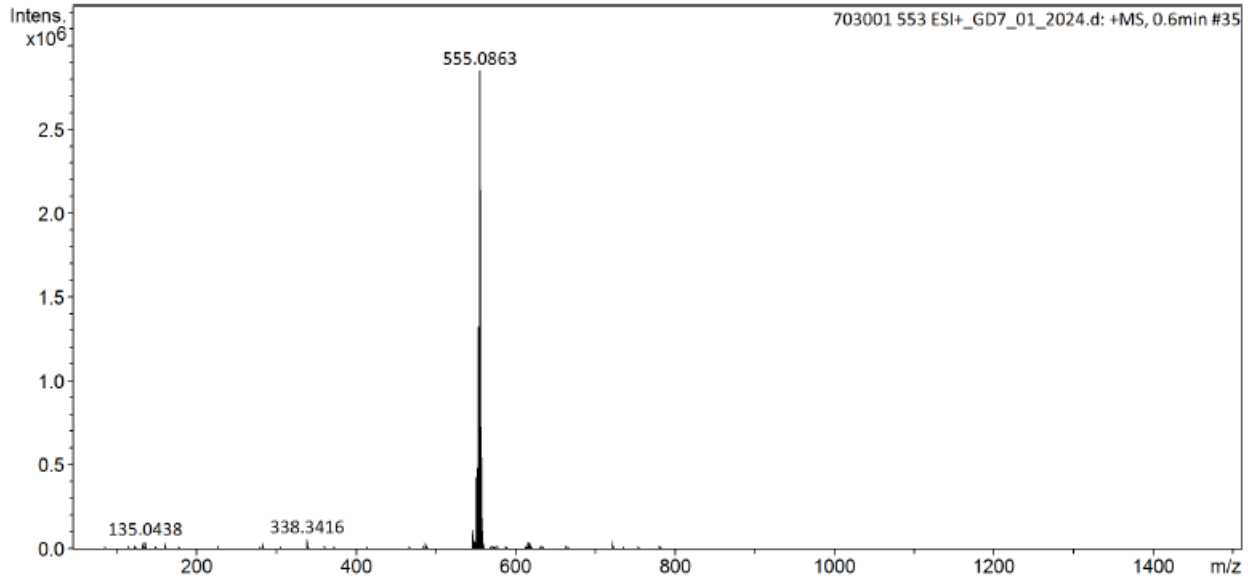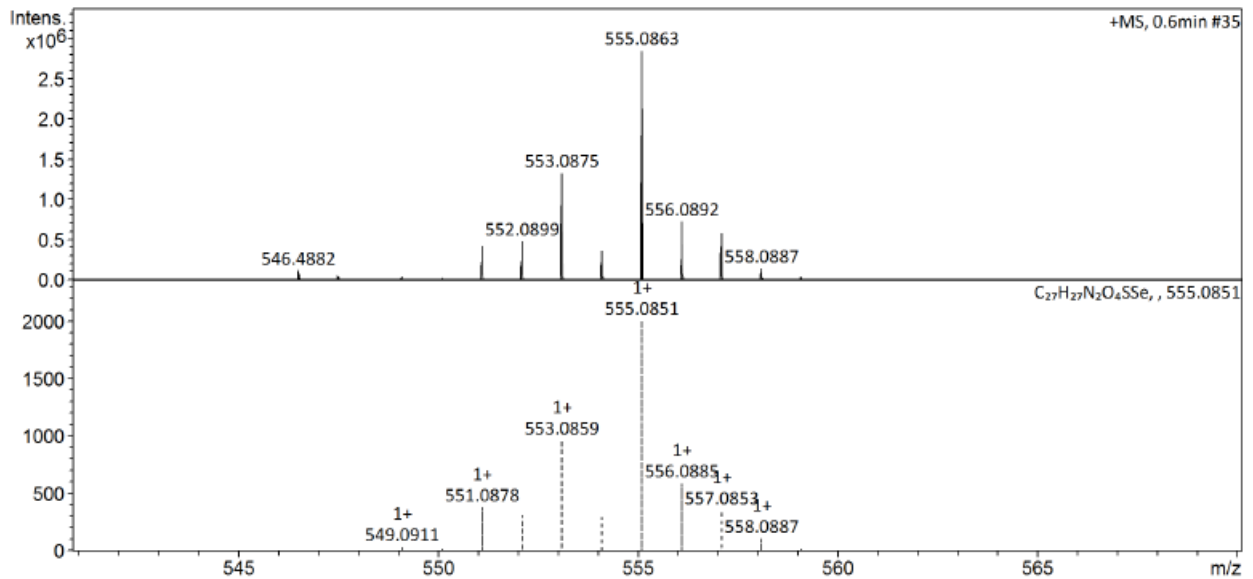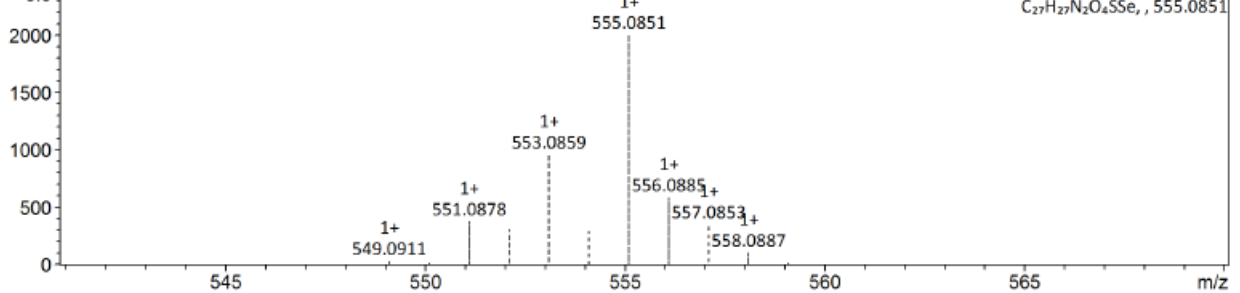

7f HR-MS

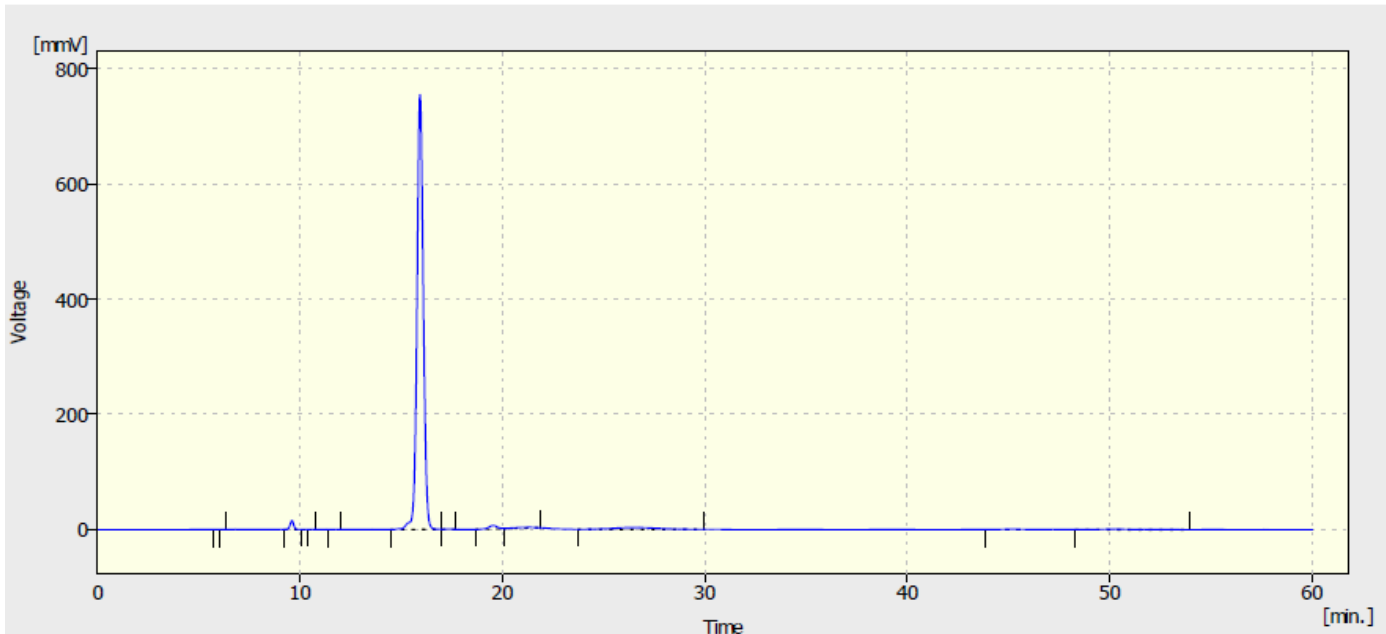

Result Table (Uncal - D:\Documents\changwongjin\chang702906)

|    | Reten. Time [min] | Area [mV.s] | Height [mV] | Area [%] | Height [%] | W05 [min] |
|----|-------------------|-------------|-------------|----------|------------|-----------|
| 1  | 5.888             | 2.396       | 0.317       | 0.0      | 0.0        | 0.12      |
| 2  | 6.096             | 4.101       | 0.520       | 0.0      | 0.1        | 0.12      |
| 3  | 9.592             | 198.936     | 15.595      | 1.1      | 2.0        | 0.19      |
| 4  | 10.204            | 6.123       | 0.471       | 0.0      | 0.1        | 0.25      |
| 5  | 10.532            | 4.036       | 0.341       | 0.0      | 0.0        | 0.19      |
| 6  | 11.800            | 3.878       | 0.303       | 0.0      | 0.0        | 0.19      |
| 7  | 15.924            | 16435.199   | 754.252     | 93.2     | 96.0       | 0.33      |
| 8  | 17.344            | 16.303      | 0.878       | 0.1      | 0.1        | 0.31      |
| 9  | 19.536            | 185.924     | 6.029       | 1.1      | 0.8        | 0.46      |
| 10 | 21.308            | 104.960     | 1.402       | 0.6      | 0.2        | 0.98      |
| 11 | 26.428            | 495.375     | 3.195       | 2.8      | 0.4        | 2.40      |
| 12 | 45.240            | 81.921      | 1.010       | 0.5      | 0.1        | 1.01      |
| 13 | 50.260            | 95.109      | 0.960       | 0.5      | 0.1        | 1.39      |
|    | Total             | 17634.260   | 785.271     | 100.0    | 100.0      |           |

### 7f chiral HPLC

SAMPLE : \_\_\_\_\_  
 ID # : 002  
 LAMP λ : 589 nm  
 CONC : 0.04000 g/ml  
 CELL LG: 010 mm  
 TEMP CORR: +0.00037  
 INTERVAL: 1 min

SPECIFIC ROTATION [α]  
 COUNT [α](°) TEMP(°C)  
 01 - 74.3747 20.6  
 02 - 75.2497 20.6  
 03 - 75.7497 20.6  
 04 - 76.1247 20.6  
 05 - 76.8747 20.6  
 06 - 77.3747 20.6  
 07 - 77.7497 20.6  
 08 - 78.2497 20.6  
 09 - 78.6247 20.6  
 10 - 78.9997 20.7

MEAN = - 76.9372°  
 σ(N-1) = 1.5334°  
 C.V. = 1.9931%

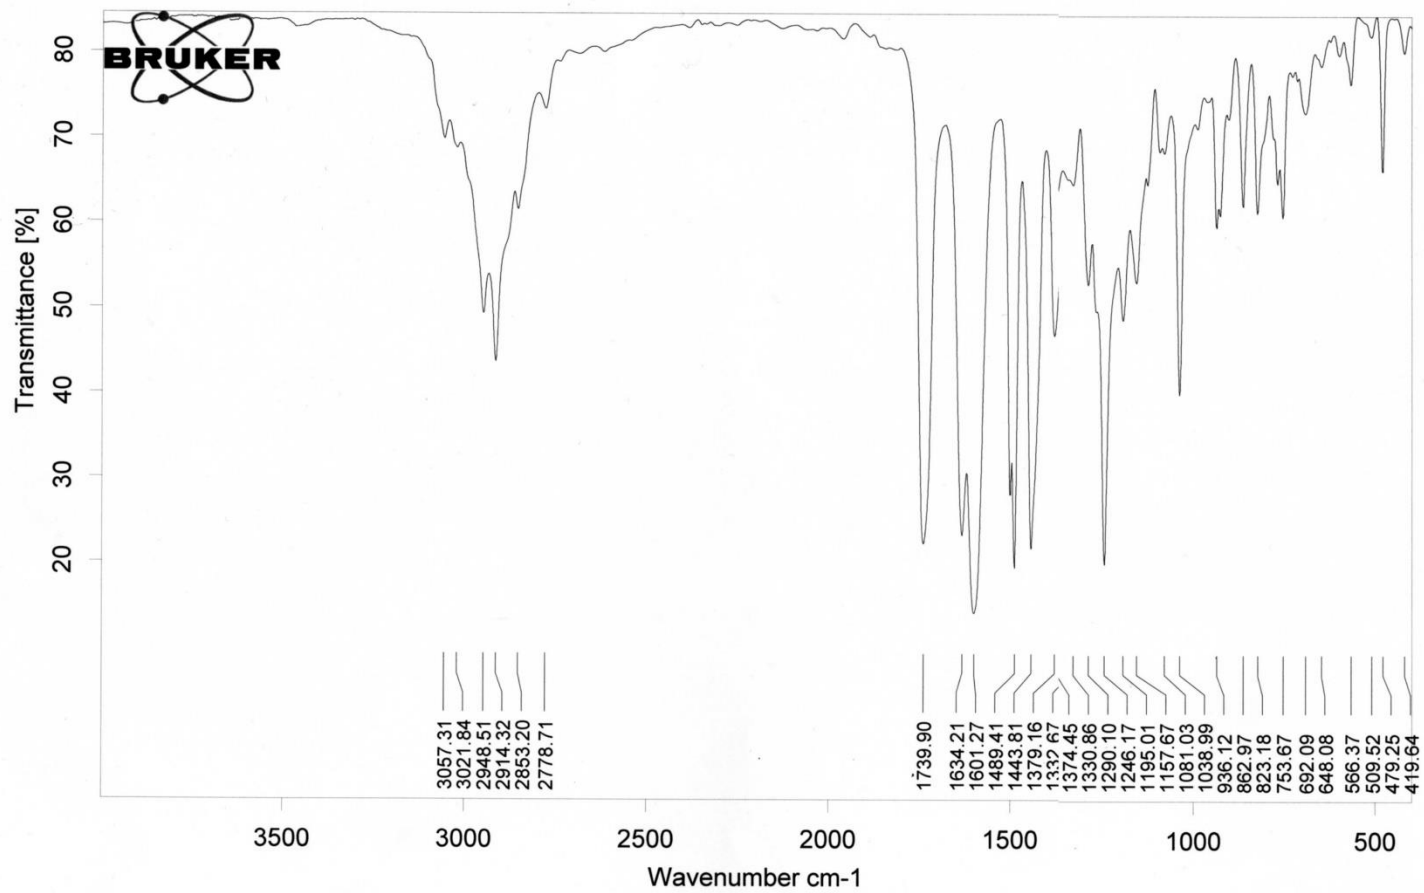

D:\temp-files\FTIR files\201502\20150210\MIR\_TR\_DTGS\_chang702901.0.dpt



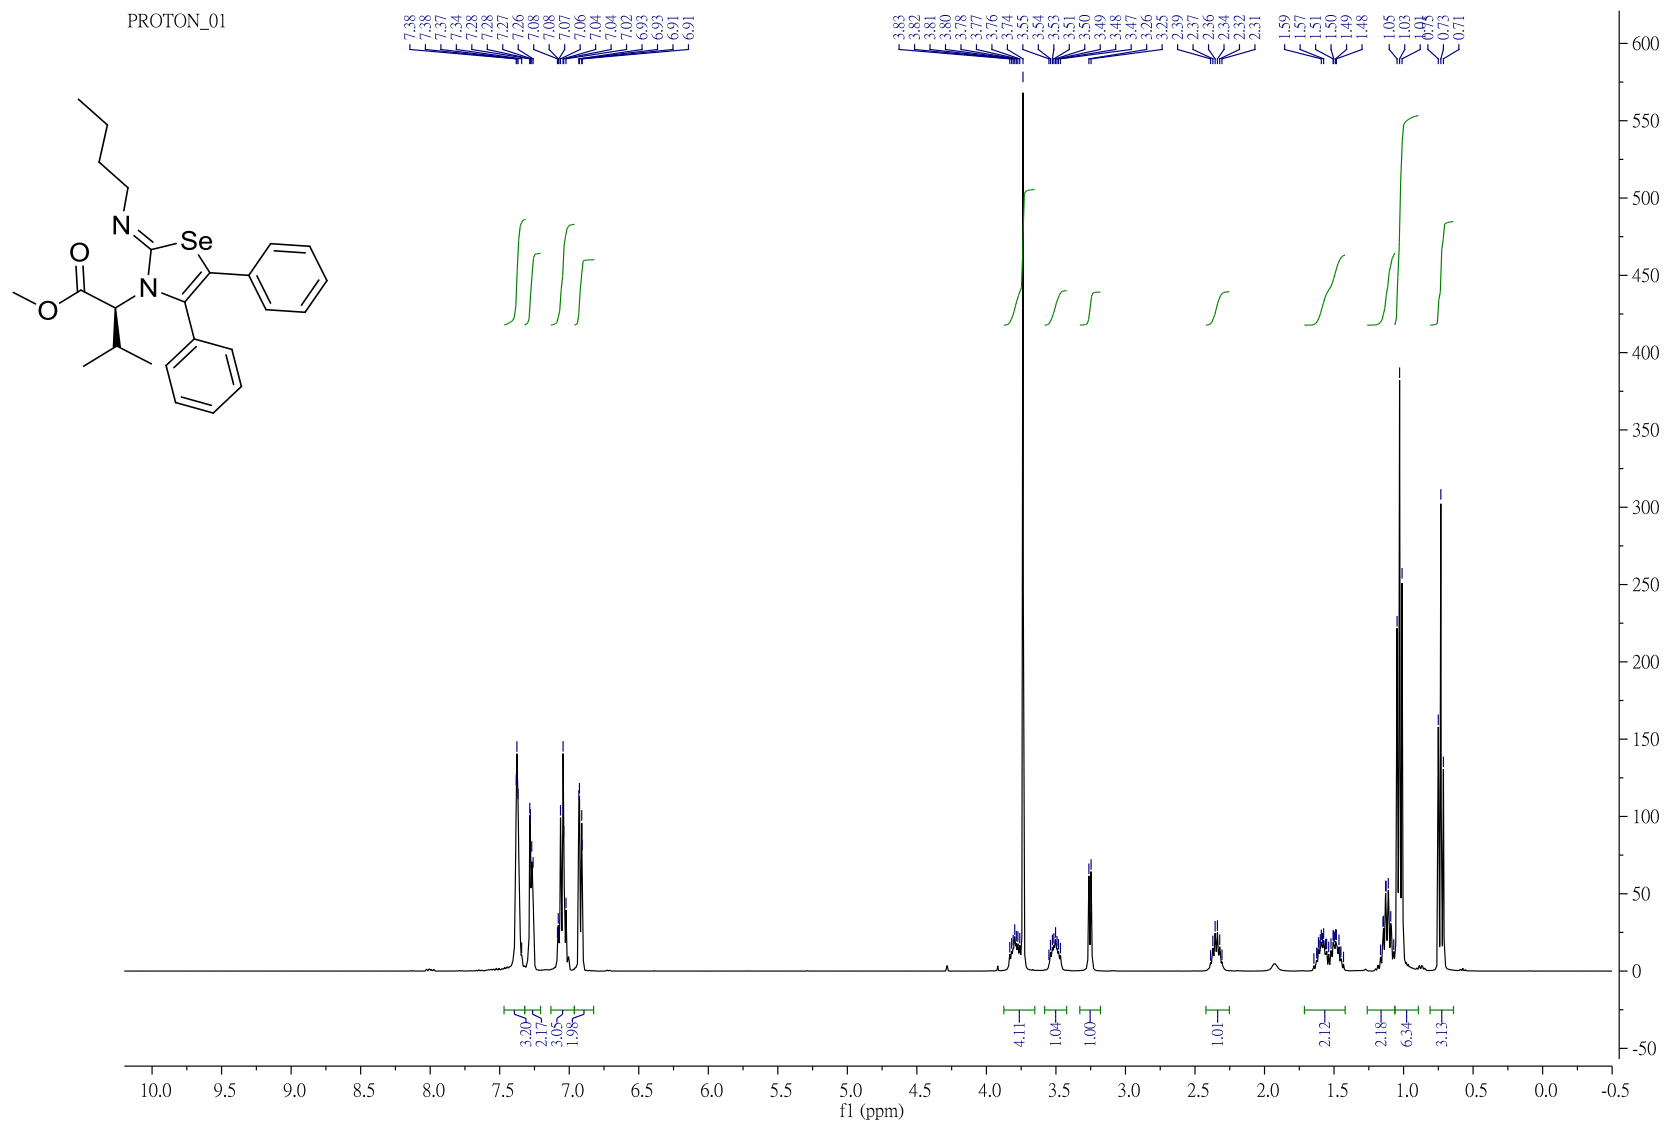

9a  $^1\text{H}$ NMR

S161

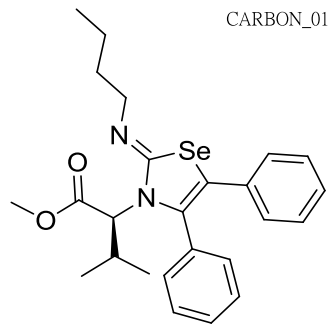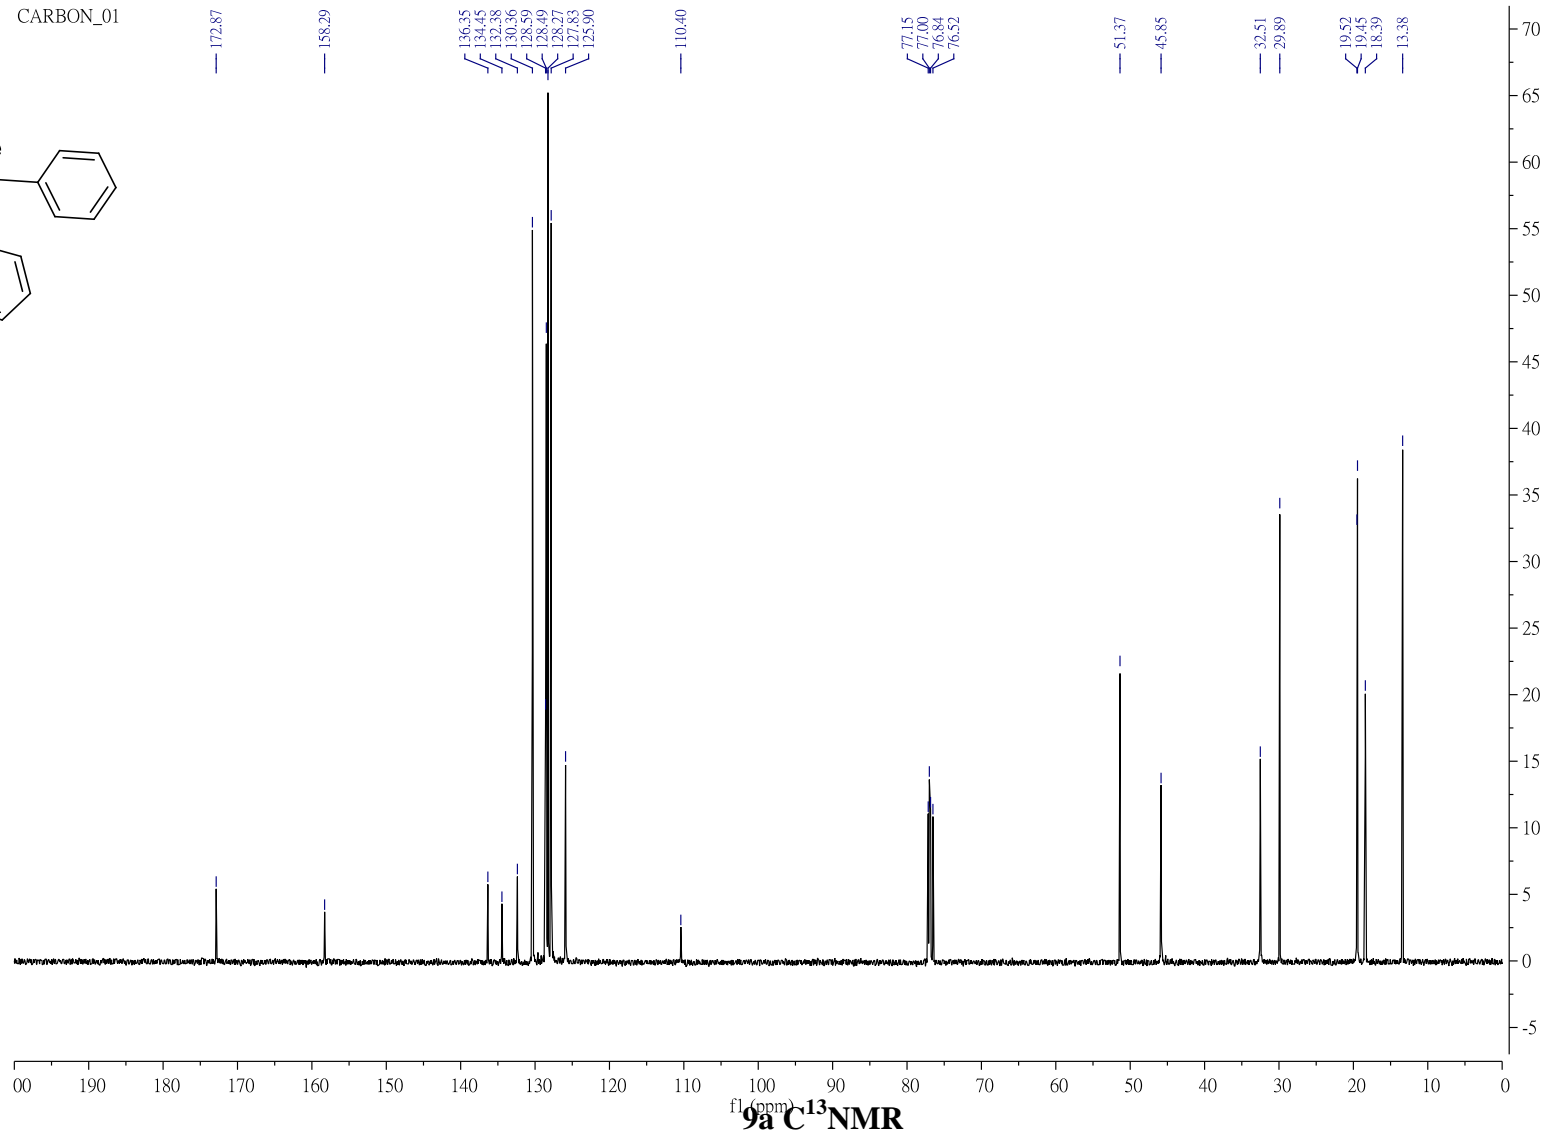

Chang706001

2014062419 28 (1.918) Cn (Cen,2, 80.00, Ht); Sm (Mn, 2x0.75); Sb (3,20.00 ); Cm (27.30-3.20x3.000)

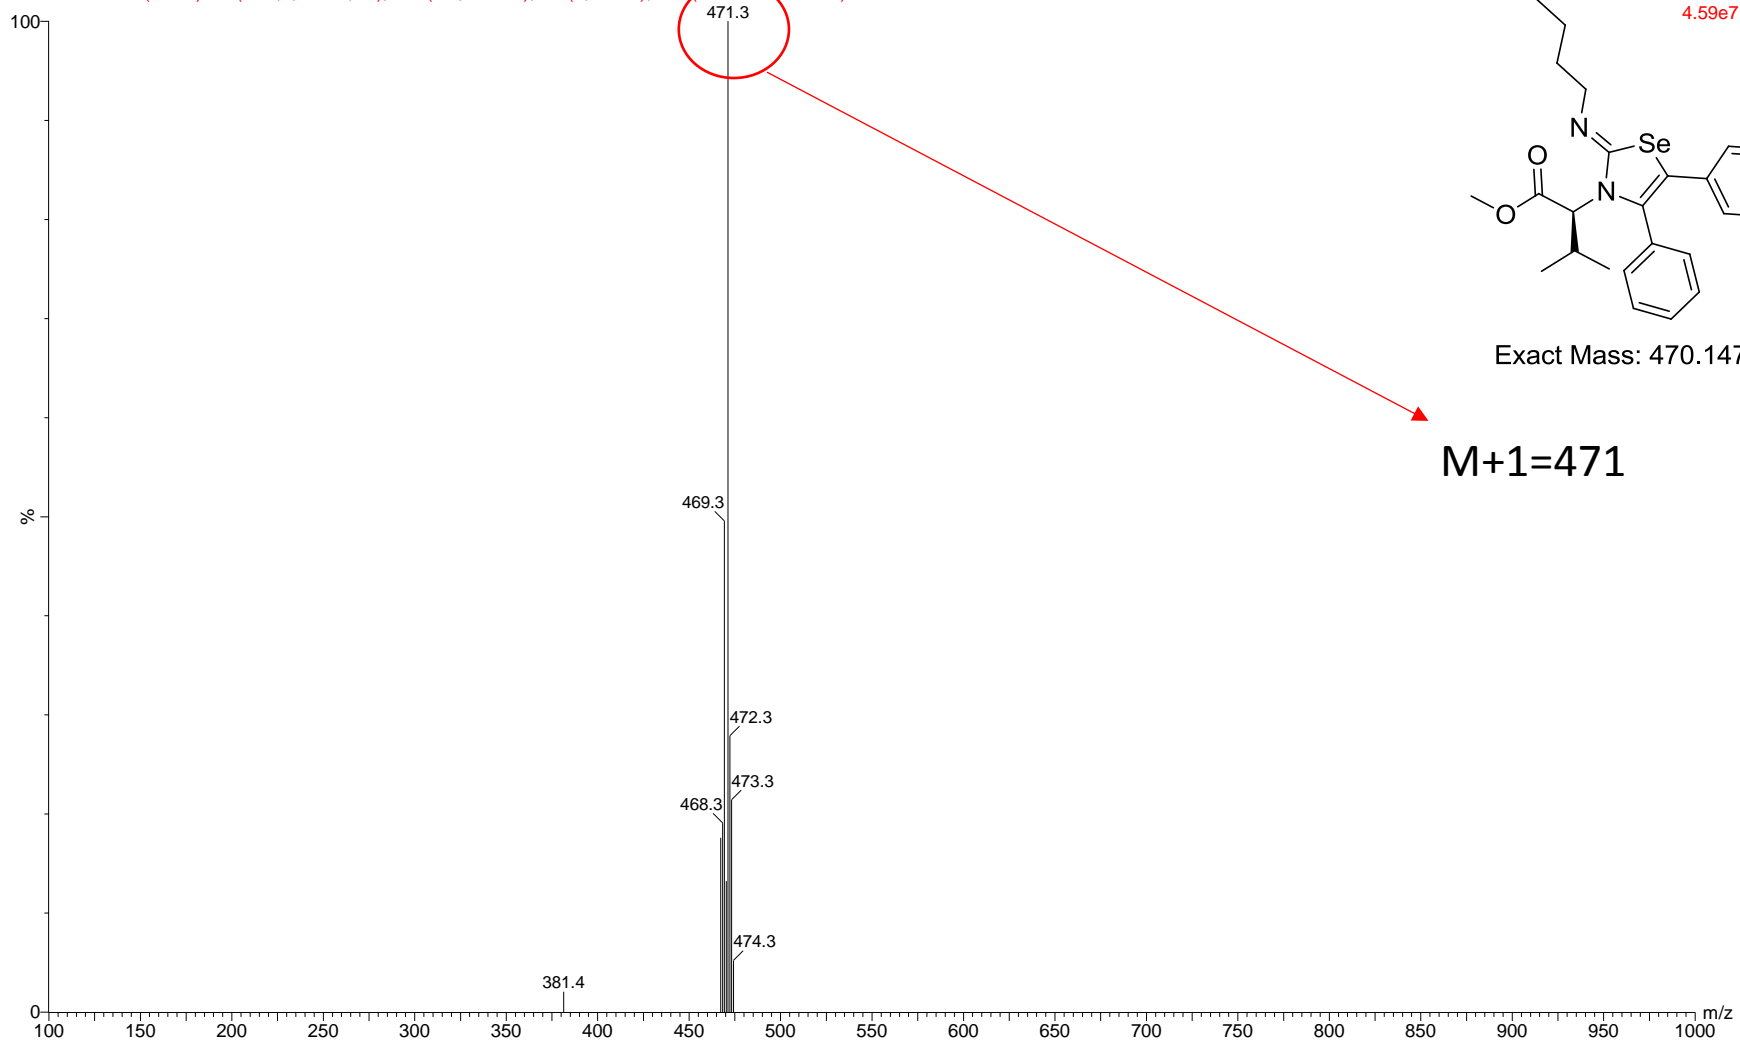

9a LR-MS

# Display Report

## Analysis Info

Analysis Name D:\Data\NCTU SERVICE\Data\20140626\706001\_470 ESI+\_GD3\_01\_2032.d  
Method Small molecule.m  
Sample Name 706001\_470 ESI+  
Comment

Acquisition Date 6/26/2014 3:14:43 PM  
Operator NCTU  
Instrument impact HD 1819696.00164

## Acquisition Parameter

|             |          |                      |          |                  |           |
|-------------|----------|----------------------|----------|------------------|-----------|
| Source Type | ESI      | Ion Polarity         | Positive | Set Nebulizer    | 1.0 Bar   |
| Focus       | Active   | Set Capillary        | 4500 V   | Set Dry Heater   | 200 °C    |
| Scan Begin  | 50 m/z   | Set End Plate Offset | -500 V   | Set Dry Gas      | 6.0 l/min |
| Scan End    | 1500 m/z | Set Charging Voltage | 2000 V   | Set Divert Valve | Waste     |
|             |          | Set Corona           | 0 nA     | Set APCI Heater  | 0 °C      |

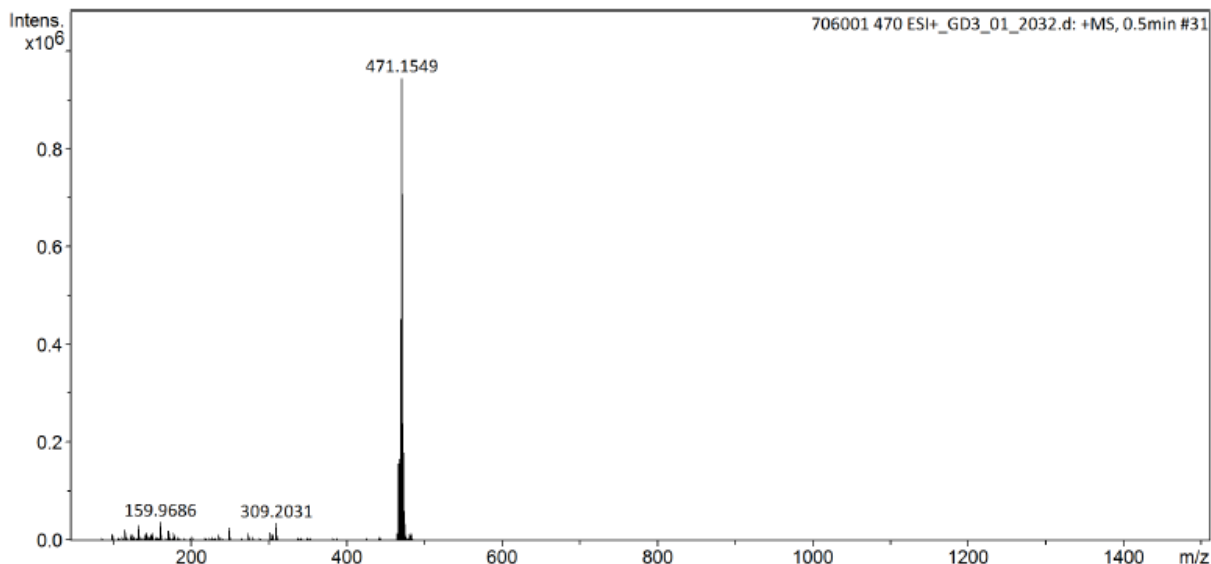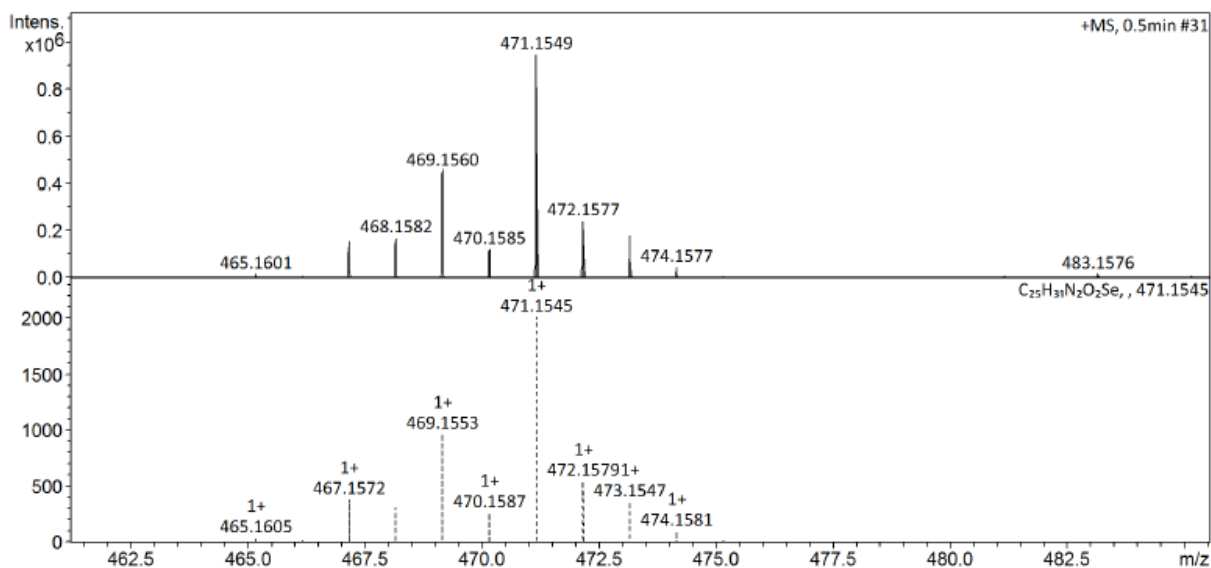

706001\_470 ESI+\_GD3\_01\_2032.d

Bruker Compass DataAnalysis 4.1

printed: 8/26/2014 1:06:36 PM

by: NCTU

Page 1 of 1

9a HR-MS

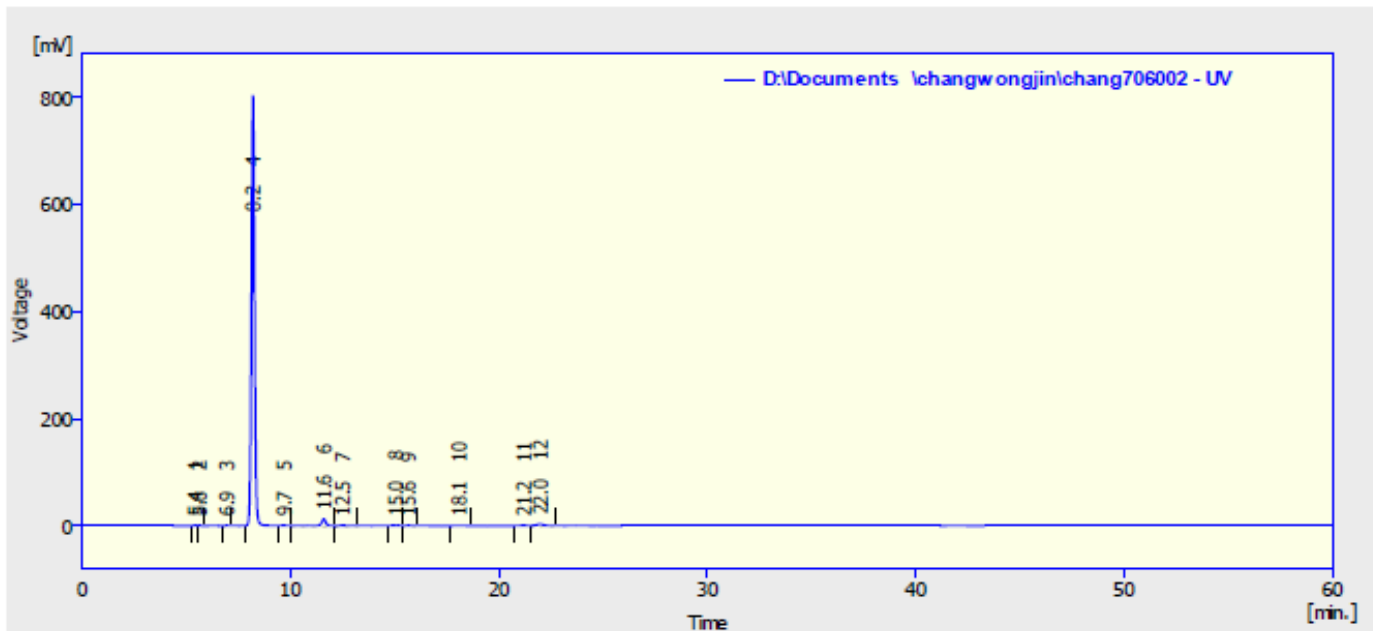

Result Table (Uncal - D:\Documents \changwongjin\chang706002 - UV)

|    | Reten. Time [min] | Area [mV.s] | Height [mV] | Area [%] | Height [%] | W05 [min] |
|----|-------------------|-------------|-------------|----------|------------|-----------|
| 1  | 5.404             | 7.641       | 1.097       | 0.1      | 0.1        | 0.11      |
| 2  | 5.604             | 6.279       | 0.771       | 0.1      | 0.1        | 0.13      |
| 3  | 6.932             | 4.144       | 0.485       | 0.0      | 0.1        | 0.13      |
| 4  | 8.200             | 8342.581    | 803.542     | 96.5     | 97.6       | 0.16      |
| 5  | 9.660             | 8.078       | 0.643       | 0.1      | 0.1        | 0.19      |
| 6  | 11.600            | 167.943     | 12.305      | 1.9      | 1.5        | 0.20      |
| 7  | 12.492            | 10.123      | 0.404       | 0.1      | 0.0        | 0.38      |
| 8  | 15.036            | 15.208      | 0.875       | 0.2      | 0.1        | 0.28      |
| 9  | 15.628            | 3.510       | 0.202       | 0.0      | 0.0        | 0.30      |
| 10 | 18.076            | 8.306       | 0.338       | 0.1      | 0.0        | 0.38      |
| 11 | 21.208            | 11.359      | 0.424       | 0.1      | 0.1        | 0.47      |
| 12 | 21.984            | 62.796      | 2.519       | 0.7      | 0.3        | 0.38      |
|    | Total             | 8647.971    | 823.605     | 100.0    | 100.0      |           |

Result Table (Uncal - D:\Documents \changwongjin\chang706002 - UV2)

| Reten. Time [min] | Area [mV.s] | Height [mV] | Area [%] | Height [%] | W05 [min] |
|-------------------|-------------|-------------|----------|------------|-----------|
| No peak to report |             |             |          |            |           |

### 9a chiral HPLC

SAMPLE : \_\_\_\_\_  
 ID # : 008  
 LAMP λ : 589 nm  
 CONC : 0.01000 g/ml  
 CELL LG: 010 mm  
 TEMP CORR: +0.00037  
 INTERVAL: 1 min

---

SPECIFIC ROTATION [α]  
 COUNT [α] (°) TEMP (°C)  
 01 - 11.5002 19.4  
 02 - 14.0002 19.4  
 03 - 13.5002 19.4  
 04 - 10.5002 19.4  
 05 - 12.5002 19.4  
 06 - 14.0001 19.5  
 07 - 14.0001 19.5  
 08 - 14.5001 19.5  
 09 - 15.0001 19.5  
 10 - 15.0001 19.5

---

MEAN = - 13.4502°  
 σ(N-1) = 1.4990°  
 C. V. = - 11.1452%

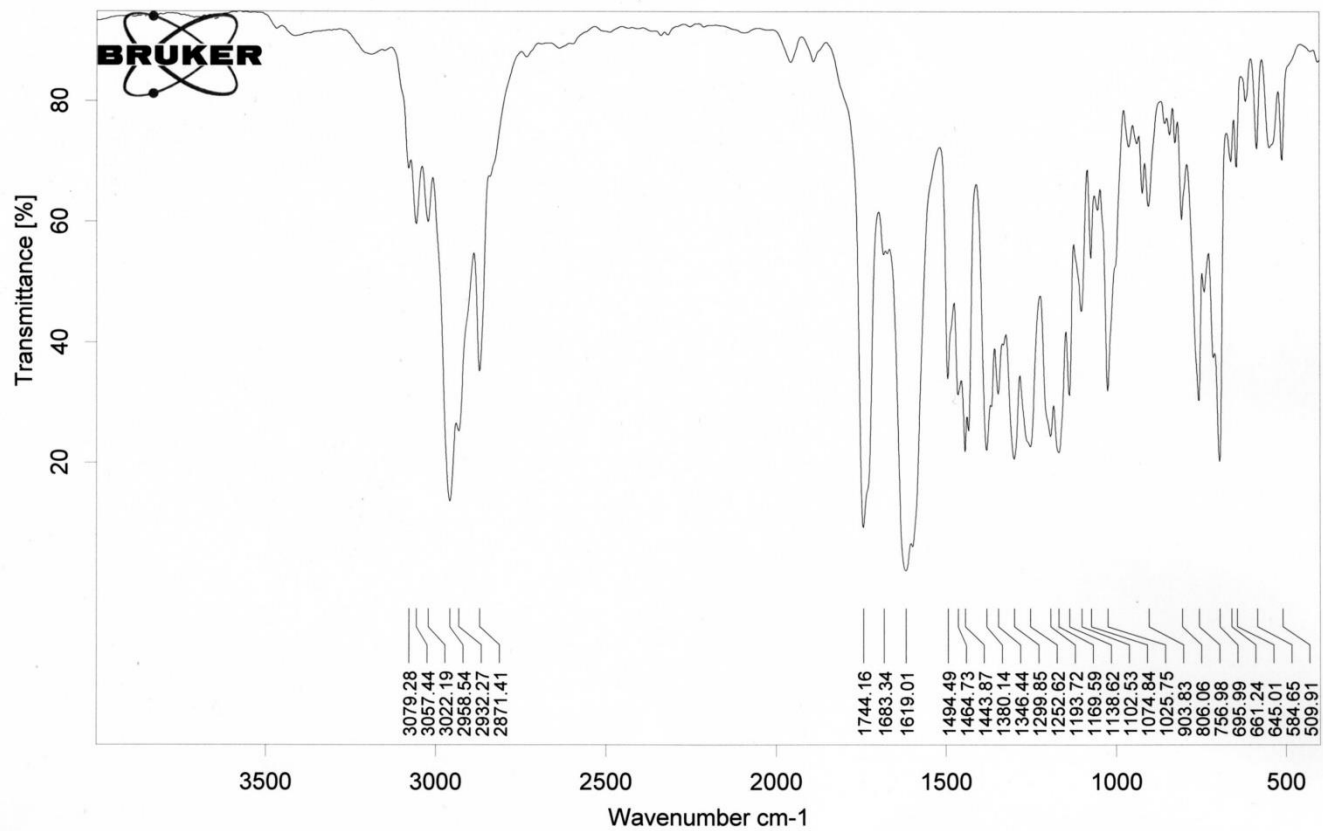

D:\temp-files\FTIR files\201501\20150121\MIR\_TR\_DTGS\_blank KBr\_chang706001.0.dpt

chang120821

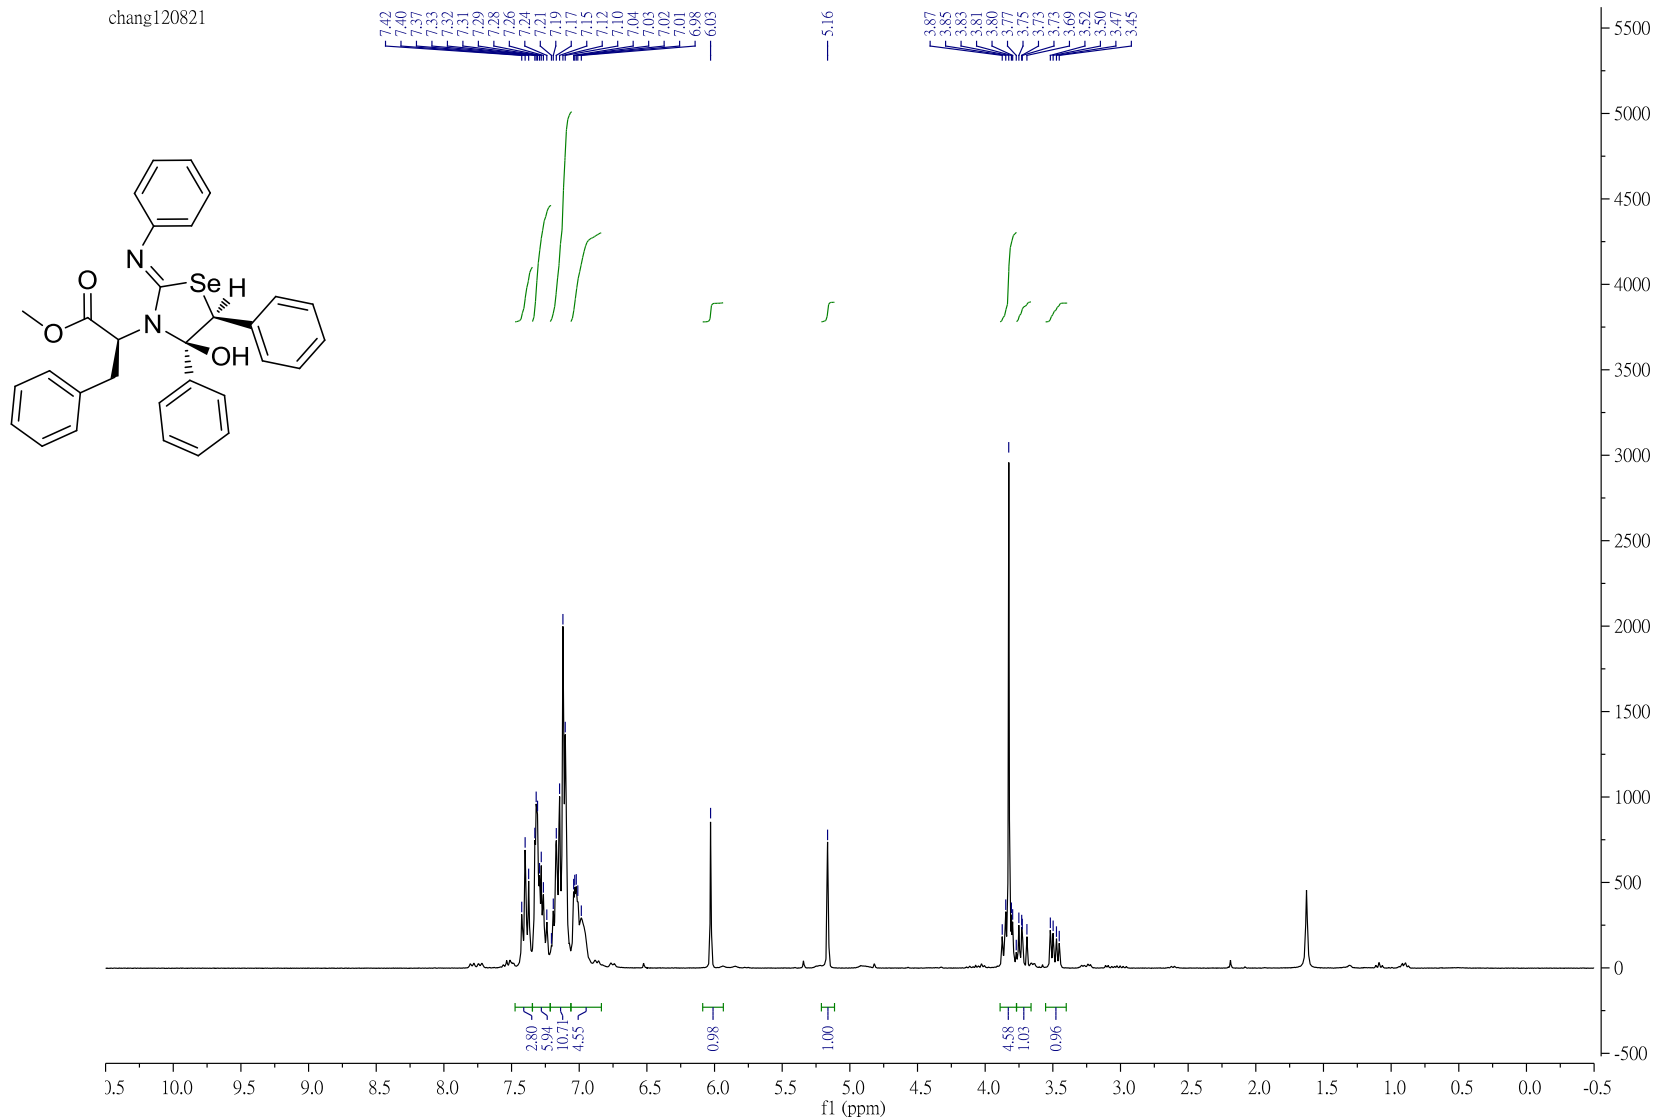

**9b  $^1\text{H}$ NMR**

S167

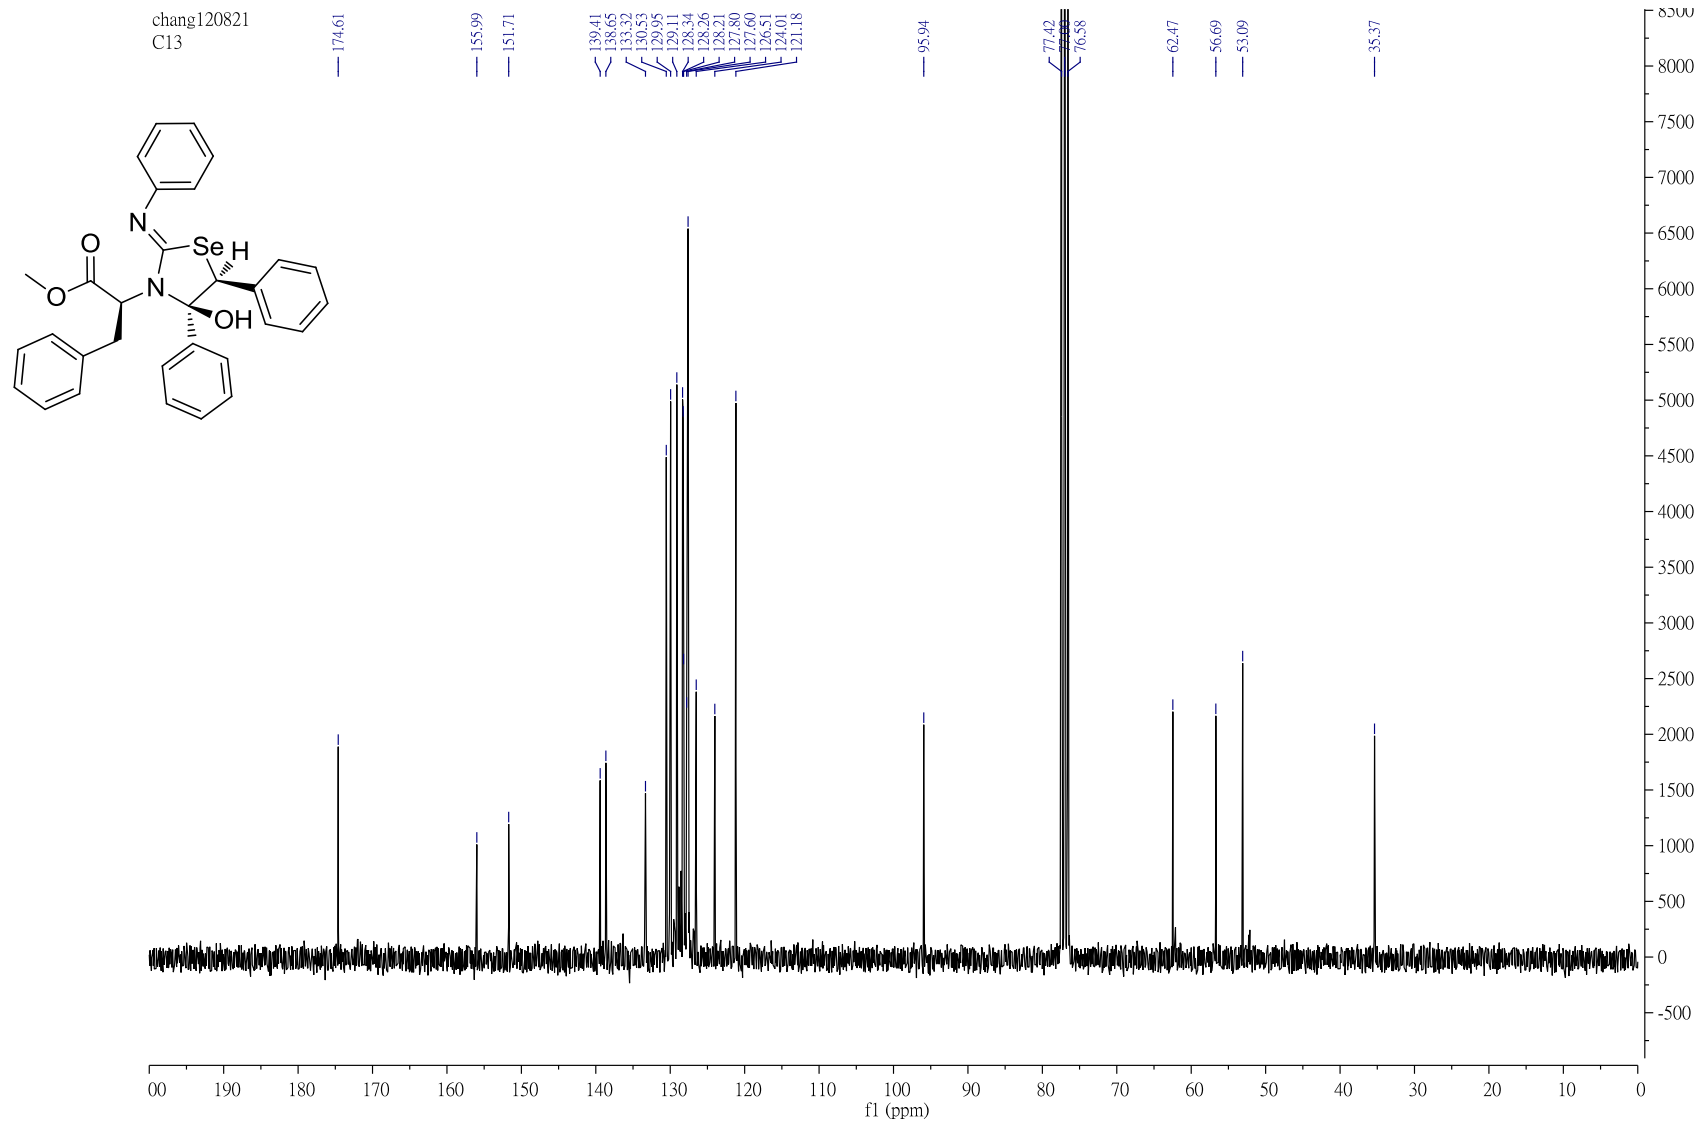

9b  $C^{13}$  NMR

S168



chang505101

2012051807 14 (0.959) Cn (Cen,2, 60.00, Ht); Sm (Mn, 2x0.75); Sb (3,40.00); Cm (11:20-2:10x5.000)

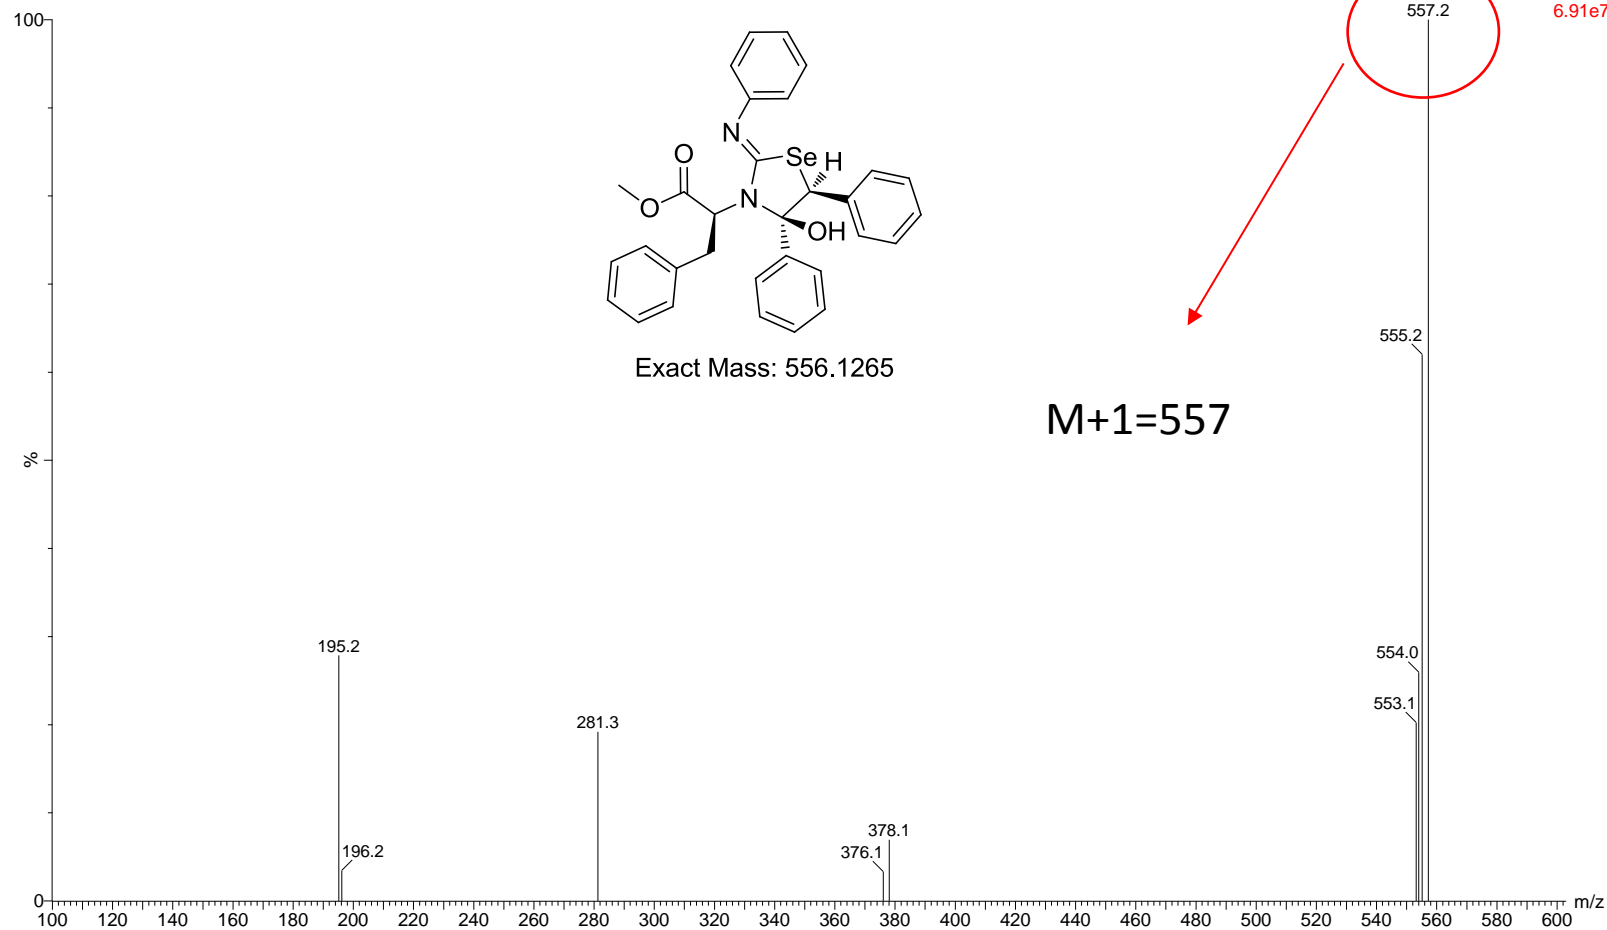

9b LR-MS

S169

NCTU-SUN-15030 ESI+  
Molecular Formula: C<sub>31</sub>H<sub>29</sub>N<sub>2</sub>O<sub>3</sub>Se  
Exact Mass: 557.1343  
Measured Mass: 557.1346

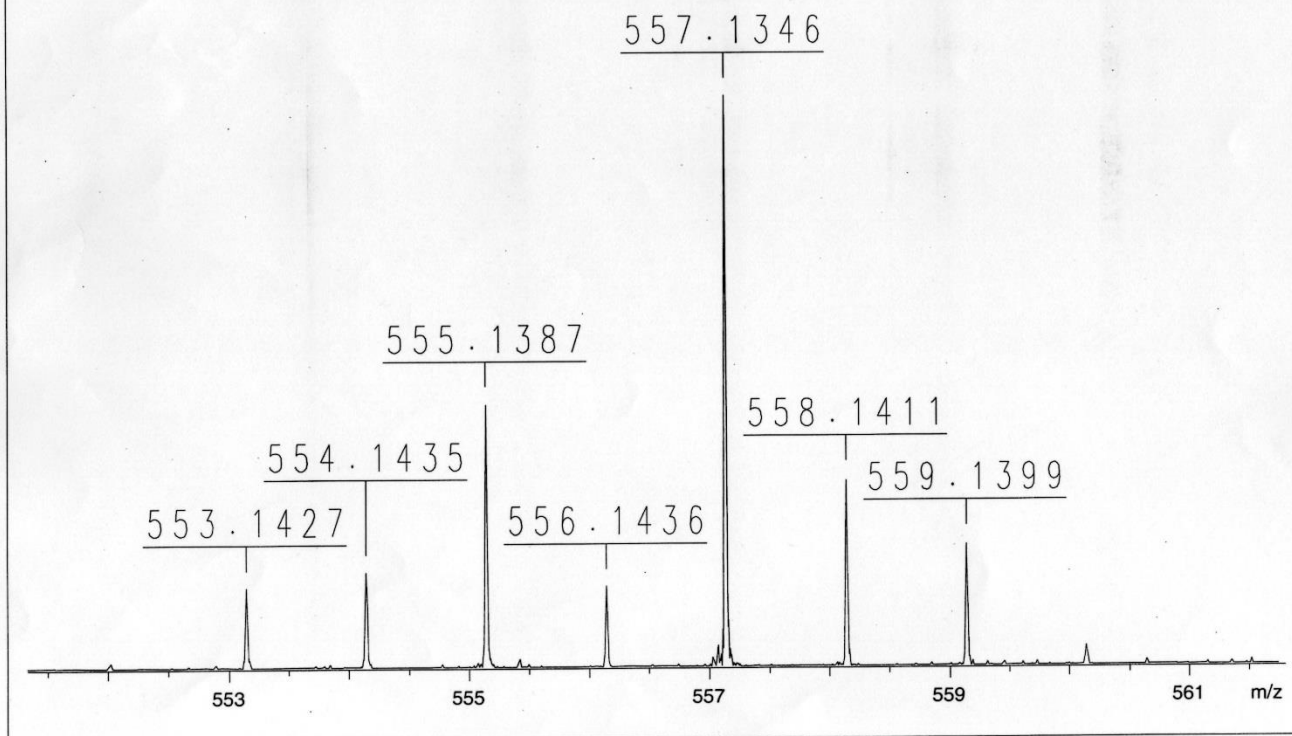

/d=/Data/yy/NCTUSUN15030/1/pdata/1 Administrator Tue Jul 10 14:14:42 2012

9b HR-MS

S170

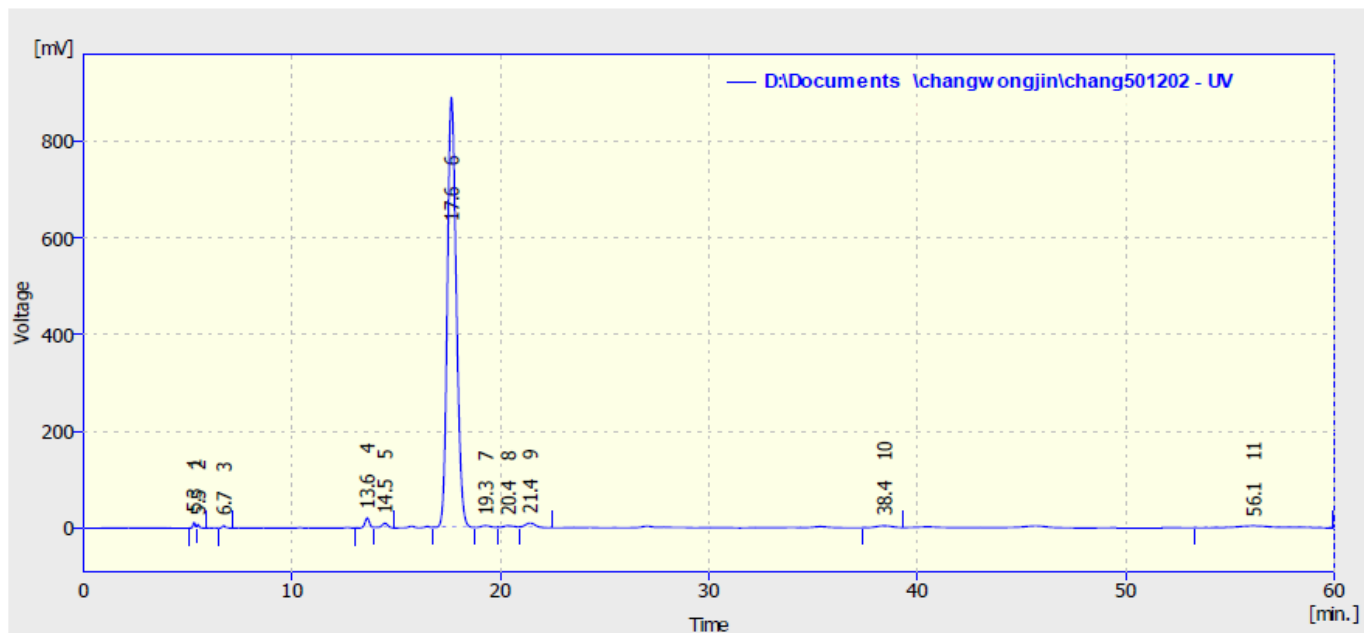

Result Table (Uncal - D:|Documents |changwongjin|chang501202 - UV)

|    | Reten. Time [min] | Area [mV.s] | Height [mV] | Area [%] | Height [%] |
|----|-------------------|-------------|-------------|----------|------------|
| 1  | 5.304             | 83.097      | 11.850      | 0.3      | 1.2        |
| 2  | 5.484             | 60.351      | 7.343       | 0.2      | 0.8        |
| 3  | 6.724             | 49.096      | 4.875       | 0.2      | 0.5        |
| 4  | 13.612            | 314.587     | 20.748      | 1.1      | 2.1        |
| 5  | 14.464            | 209.177     | 9.709       | 0.7      | 1.0        |
| 6  | 17.648            | 26669.174   | 889.464     | 92.7     | 91.6       |
| 7  | 19.288            | 136.842     | 4.170       | 0.5      | 0.4        |
| 8  | 20.372            | 151.700     | 4.244       | 0.5      | 0.4        |
| 9  | 21.428            | 338.807     | 9.698       | 1.2      | 1.0        |
| 10 | 38.424            | 199.907     | 4.108       | 0.7      | 0.4        |
| 11 | 56.140            | 554.114     | 4.324       | 1.9      | 0.4        |
|    | Total             | 28766.853   | 970.534     | 100.0    | 100.0      |

### 9b chiral HPLC

SAMPLE : \_\_\_\_\_  
 ID # : 011  
 LAMP λ : 589 nm  
 CONC : 0.01000 g/ml  
 CELL LG: 010 mm  
 TEMP CORR: +0.00037  
 INTERVAL: 1 min

SPECIFIC ROTATION [α]  
 COUNT [α](°) TEMP(°C)  
 01 - 77.9998 20.4  
 02 - 76.9998 20.4  
 03 - 77.4998 20.5  
 04 - 78.9998 20.5  
 05 - 76.4998 20.5  
 06 - 79.4998 20.5  
 07 - 77.9998 20.5  
 08 - 78.9997 20.6  
 09 - 79.9997 20.6  
 10 - 80.4997 20.6

MEAN = - 78.4998°  
 σ(N-1) = 1.3123°  
 C. V. = - 1.6717%

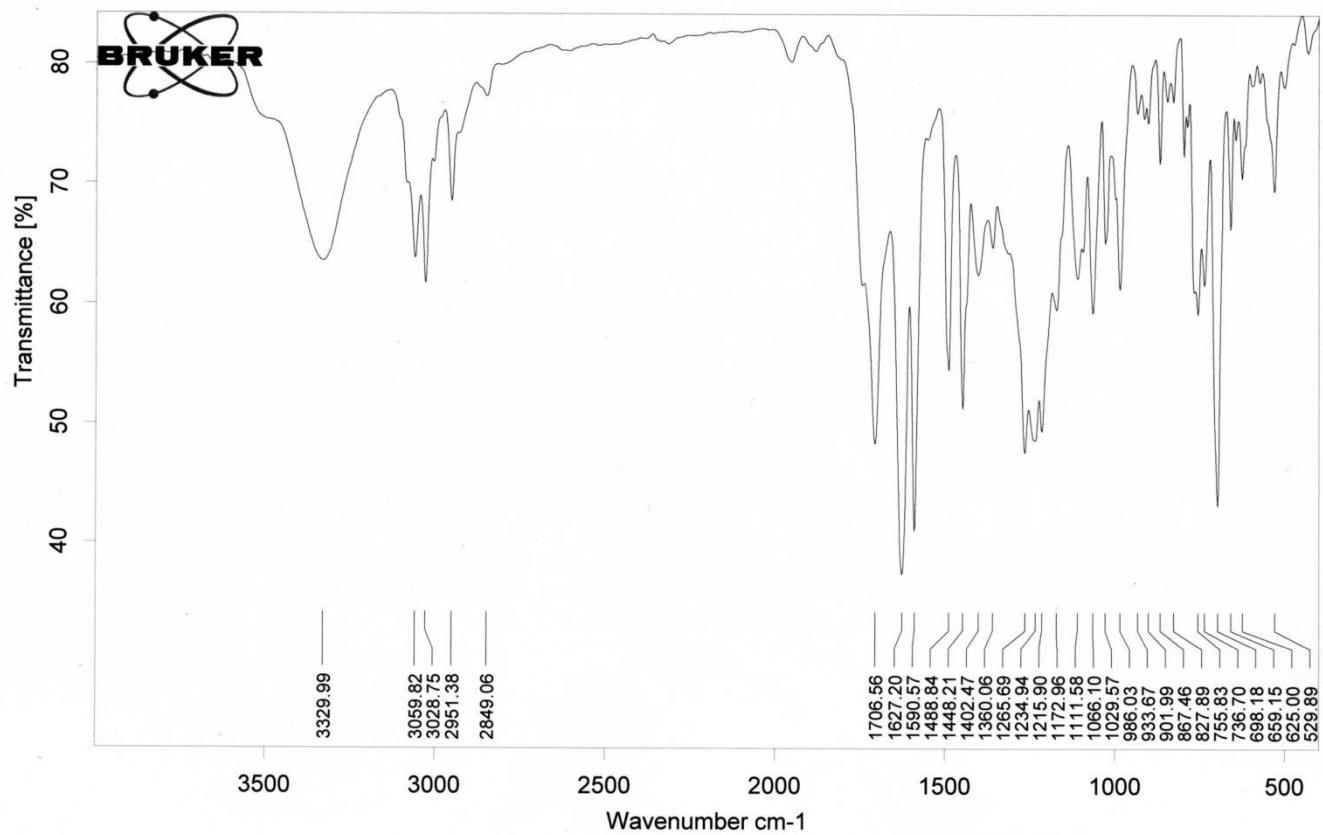

D:\temp-files\FTIR files\201501\20150121\MIR\_TR\_DTGS\_blank KBr\_chang505101.0.dpt

9b FT-IR

# **X-ray data**

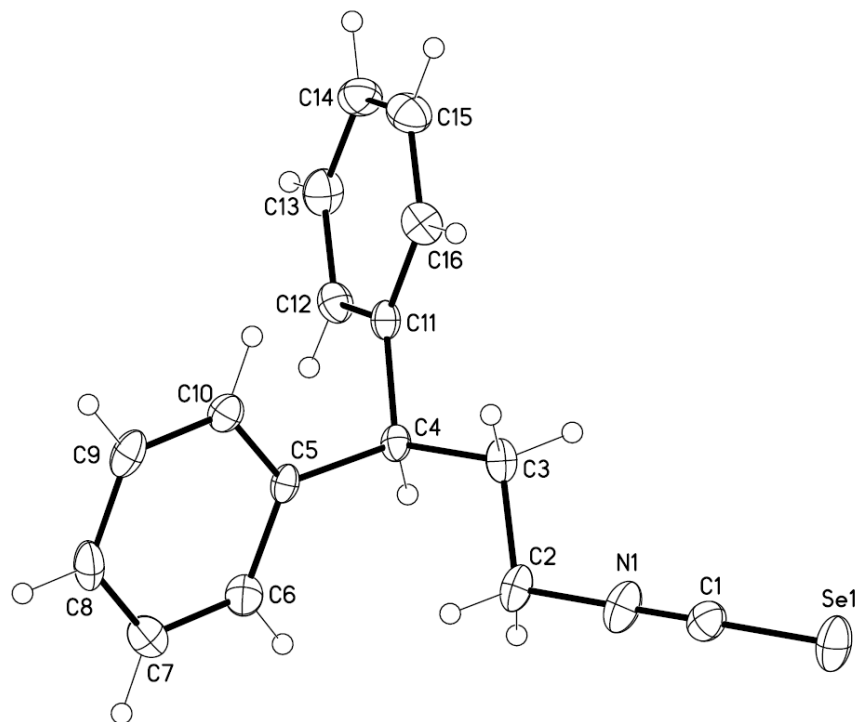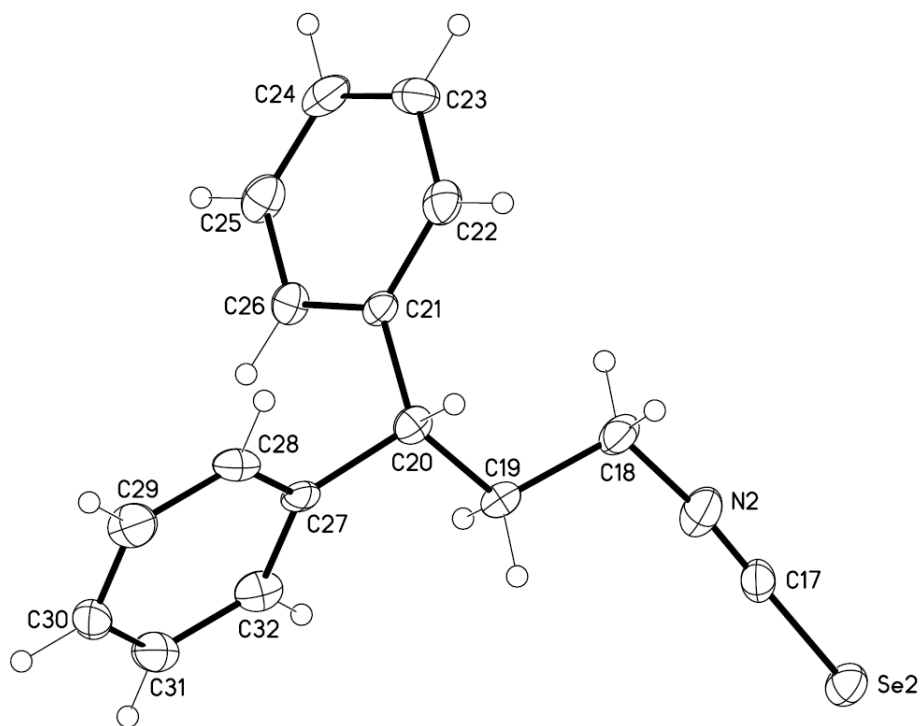

**X-Ray ORTEP diagram of (3-isoselenocyanatopropane-1,1-diyl)dibenzene 1f**

Table 1. Crystal data and structure refinement for mo\_140308LT\_0m.

|                     |                                                                |
|---------------------|----------------------------------------------------------------|
| Identification code | mo_140308lt_0m                                                 |
| Empirical formula   | C <sub>32</sub> H <sub>30</sub> N <sub>2</sub> Se <sub>2</sub> |
| Formula weight      | 600.50                                                         |

|                                   |                                             |                       |
|-----------------------------------|---------------------------------------------|-----------------------|
| Temperature                       | 100(2) K                                    |                       |
| Wavelength                        | 0.71073 Å                                   |                       |
| Crystal system                    | Monoclinic                                  |                       |
| Space group                       | P 21/n                                      |                       |
| Unit cell dimensions              | a = 14.8679(9) Å                            | $\alpha = 90^\circ$ . |
| b = 10.0040(6) Å                  | $\beta = 98.871(2)^\circ$ .                 |                       |
| c = 18.5854(11) Å                 | $\gamma = 90^\circ$ .                       |                       |
| Volume                            | 2731.3(3) Å <sup>3</sup>                    |                       |
| Z                                 | 4                                           |                       |
| Density (calculated)              | 1.460 Mg/m <sup>3</sup>                     |                       |
| Absorption coefficient            | 2.731 mm <sup>-1</sup>                      |                       |
| F(000)                            | 1216                                        |                       |
| Crystal size                      | 0.30 x 0.30 x 0.10 mm <sup>3</sup>          |                       |
| Theta range for data collection   | 1.636 to 26.381°.                           |                       |
| Index ranges                      | -16 ≤ h ≤ 18, -12 ≤ k ≤ 12, -23 ≤ l ≤ 23    |                       |
| Reflections collected             | 19190                                       |                       |
| Independent reflections           | 5560 [R(int) = 0.0286]                      |                       |
| Completeness to theta = 25.242°   | 99.7 %                                      |                       |
| Absorption correction             | Semi-empirical from equivalents             |                       |
| Max. and min. transmission        | 0.9485 and 0.7832                           |                       |
| Refinement method                 | Full-matrix least-squares on F <sup>2</sup> |                       |
| Data / restraints / parameters    | 5560 / 0 / 325                              |                       |
| Goodness-of-fit on F <sup>2</sup> | 1.026                                       |                       |
| Final R indices [I > 2σ(I)]       | R1 = 0.0272, wR2 = 0.0575                   |                       |
| R indices (all data)              | R1 = 0.0409, wR2 = 0.0615                   |                       |
| Extinction coefficient            | n/a                                         |                       |
| Largest diff. peak and hole       | 0.427 and -0.371 e.Å <sup>-3</sup>          |                       |

Table 2. Atomic coordinates ( $\times 10^4$ ) and equivalent isotropic displacement parameters ( $\text{\AA}^2 \times 10^3$ ) for mo\_140308LT\_0m.  $U(\text{eq})$  is defined as one third of the trace of the orthogonalized  $U^{ij}$  tensor.

| x     | y       | z        | U(eq)   |       |
|-------|---------|----------|---------|-------|
| Se(1) | 5341(1) | 12366(1) | 799(1)  | 29(1) |
| Se(2) | 4032(1) | -4739(1) | 994(1)  | 24(1) |
| N(1)  | 5844(1) | 9571(2)  | 1029(1) | 28(1) |
| N(2)  | 3541(1) | -1922(2) | 994(1)  | 29(1) |
| C(1)  | 5644(2) | 10679(2) | 940(1)  | 22(1) |
| C(2)  | 6123(2) | 8202(2)  | 1144(1) | 23(1) |
| C(3)  | 6322(2) | 7871(2)  | 1954(1) | 19(1) |
| C(4)  | 6500(1) | 6364(2)  | 2075(1) | 15(1) |
| C(5)  | 7317(1) | 5923(2)  | 1730(1) | 15(1) |
| C(6)  | 7184(2) | 5391(2)  | 1028(1) | 21(1) |
| C(7)  | 7917(2) | 5061(2)  | 685(1)  | 24(1) |
| C(8)  | 8799(2) | 5232(2)  | 1044(1) | 24(1) |
| C(9)  | 8942(2) | 5748(2)  | 1745(1) | 22(1) |
| C(10) | 8205(2) | 6092(2)  | 2084(1) | 19(1) |
| C(11) | 6589(1) | 5955(2)  | 2870(1) | 16(1) |
| C(12) | 6320(2) | 4670(2)  | 3036(1) | 20(1) |
| C(13) | 6390(2) | 4242(2)  | 3751(1) | 24(1) |
| C(14) | 6739(2) | 5088(2)  | 4314(1) | 25(1) |
| C(15) | 7018(2) | 6359(2)  | 4157(1) | 26(1) |
| C(16) | 6943(2) | 6795(2)  | 3442(1) | 21(1) |
| C(17) | 3733(2) | -3044(2) | 998(1)  | 22(1) |
| C(18) | 3312(2) | -533(2)  | 1073(1) | 24(1) |
| C(19) | 3492(2) | -134(2)  | 1876(1) | 19(1) |
| C(20) | 3328(2) | 1367(2)  | 1990(1) | 18(1) |
| C(21) | 2347(1) | 1751(2)  | 1717(1) | 16(1) |
| C(22) | 2096(2) | 2272(2)  | 1015(1) | 22(1) |
| C(23) | 1187(2) | 2576(2)  | 751(1)  | 26(1) |
| C(24) | 531(2)  | 2373(2)  | 1197(1) | 27(1) |
| C(25) | 772(2)  | 1890(2)  | 1892(1) | 26(1) |
| C(26) | 1671(2) | 1583(2)  | 2147(1) | 21(1) |
| C(27) | 3603(1) | 1769(2)  | 2787(1) | 18(1) |
| C(28) | 3842(2) | 3087(2)  | 2945(1) | 22(1) |
| C(29) | 4083(2) | 3515(2)  | 3660(1) | 28(1) |
| C(30) | 4092(2) | 2616(2)  | 4225(1) | 28(1) |
| C(31) | 3860(2) | 1305(2)  | 4074(1) | 26(1) |



C(32)

3616(2)

878(2)

3361(1)

23(1)

---

Table 3. Bond lengths [ $\text{\AA}$ ] and angles [ $^\circ$ ] for mo\_140308LT\_0m.

---

|             |          |
|-------------|----------|
| Se(1)-C(1)  | 1.756(2) |
| Se(2)-C(17) | 1.754(2) |
| N(1)-C(1)   | 1.153(3) |
| N(1)-C(2)   | 1.437(3) |
| N(2)-C(17)  | 1.158(3) |
| N(2)-C(18)  | 1.444(3) |
| C(2)-C(3)   | 1.526(3) |
| C(2)-H(1)   | 0.9900   |
| C(2)-H(15)  | 0.9900   |
| C(3)-C(4)   | 1.541(3) |
| C(3)-H(3)   | 0.9900   |
| C(3)-H(2)   | 0.9900   |
| C(4)-C(11)  | 1.519(3) |
| C(4)-C(5)   | 1.524(3) |
| C(4)-H(14)  | 1.0000   |
| C(5)-C(10)  | 1.391(3) |
| C(5)-C(6)   | 1.393(3) |
| C(6)-C(7)   | 1.385(3) |
| C(6)-H(8)   | 0.9500   |
| C(7)-C(8)   | 1.387(3) |
| C(7)-H(4)   | 0.9500   |
| C(8)-C(9)   | 1.386(3) |
| C(8)-H(5)   | 0.9500   |
| C(9)-C(10)  | 1.390(3) |
| C(9)-H(6)   | 0.9500   |
| C(10)-H(7)  | 0.9500   |
| C(11)-C(16) | 1.394(3) |
| C(11)-C(12) | 1.395(3) |
| C(12)-C(13) | 1.385(3) |
| C(12)-H(13) | 0.9500   |
| C(13)-C(14) | 1.383(3) |
| C(13)-H(9)  | 0.9500   |
| C(14)-C(15) | 1.382(3) |
| C(14)-H(10) | 0.9500   |
| C(15)-C(16) | 1.387(3) |
| C(15)-H(11) | 0.9500   |
| C(16)-H(12) | 0.9500   |
| C(18)-C(19) | 1.528(3) |

|                  |            |
|------------------|------------|
| C(18)-H(29)      | 0.9900     |
| C(18)-H(30)      | 0.9900     |
| C(19)-C(20)      | 1.542(3)   |
| C(19)-H(17)      | 0.9900     |
| C(19)-H(16)      | 0.9900     |
| C(20)-C(21)      | 1.519(3)   |
| C(20)-C(27)      | 1.528(3)   |
| C(20)-H(28)      | 1.0000     |
| C(21)-C(26)      | 1.387(3)   |
| C(21)-C(22)      | 1.402(3)   |
| C(22)-C(23)      | 1.399(3)   |
| C(22)-H(22)      | 0.9500     |
| C(23)-C(24)      | 1.389(3)   |
| C(23)-H(18)      | 0.9500     |
| C(24)-C(25)      | 1.374(3)   |
| C(24)-H(19)      | 0.9500     |
| C(25)-C(26)      | 1.381(3)   |
| C(25)-H(20)      | 0.9500     |
| C(26)-H(21)      | 0.9500     |
| C(27)-C(28)      | 1.385(3)   |
| C(27)-C(32)      | 1.389(3)   |
| C(28)-C(29)      | 1.390(3)   |
| C(28)-H(27)      | 0.9500     |
| C(29)-C(30)      | 1.381(3)   |
| C(29)-H(26)      | 0.9500     |
| C(30)-C(31)      | 1.374(3)   |
| C(30)-H(25)      | 0.9500     |
| C(31)-C(32)      | 1.386(3)   |
| C(31)-H(24)      | 0.9500     |
| C(32)-H(23)      | 0.9500     |
|                  |            |
| C(1)-N(1)-C(2)   | 178.2(2)   |
| C(17)-N(2)-C(18) | 173.8(2)   |
| N(1)-C(1)-Se(1)  | 179.7(2)   |
| N(1)-C(2)-C(3)   | 111.16(17) |
| N(1)-C(2)-H(1)   | 109.4      |
| C(3)-C(2)-H(1)   | 109.4      |
| N(1)-C(2)-H(15)  | 109.4      |
| C(3)-C(2)-H(15)  | 109.4      |
| H(1)-C(2)-H(15)  | 108.0      |

|                   |            |
|-------------------|------------|
| C(2)-C(3)-C(4)    | 110.99(16) |
| C(2)-C(3)-H(3)    | 109.4      |
| C(4)-C(3)-H(3)    | 109.4      |
| C(2)-C(3)-H(2)    | 109.4      |
| C(4)-C(3)-H(2)    | 109.4      |
| H(3)-C(3)-H(2)    | 108.0      |
| C(11)-C(4)-C(5)   | 112.11(16) |
| C(11)-C(4)-C(3)   | 113.05(16) |
| C(5)-C(4)-C(3)    | 110.65(16) |
| C(11)-C(4)-H(14)  | 106.9      |
| C(5)-C(4)-H(14)   | 106.9      |
| C(3)-C(4)-H(14)   | 106.9      |
| C(10)-C(5)-C(6)   | 118.5(2)   |
| C(10)-C(5)-C(4)   | 121.66(18) |
| C(6)-C(5)-C(4)    | 119.79(18) |
| C(7)-C(6)-C(5)    | 120.9(2)   |
| C(7)-C(6)-H(8)    | 119.6      |
| C(5)-C(6)-H(8)    | 119.6      |
| C(6)-C(7)-C(8)    | 120.1(2)   |
| C(6)-C(7)-H(4)    | 119.9      |
| C(8)-C(7)-H(4)    | 119.9      |
| C(9)-C(8)-C(7)    | 119.7(2)   |
| C(9)-C(8)-H(5)    | 120.2      |
| C(7)-C(8)-H(5)    | 120.2      |
| C(8)-C(9)-C(10)   | 120.0(2)   |
| C(8)-C(9)-H(6)    | 120.0      |
| C(10)-C(9)-H(6)   | 120.0      |
| C(9)-C(10)-C(5)   | 120.82(19) |
| C(9)-C(10)-H(7)   | 119.6      |
| C(5)-C(10)-H(7)   | 119.6      |
| C(16)-C(11)-C(12) | 118.32(18) |
| C(16)-C(11)-C(4)  | 123.08(18) |
| C(12)-C(11)-C(4)  | 118.59(17) |
| C(13)-C(12)-C(11) | 121.02(19) |
| C(13)-C(12)-H(13) | 119.5      |
| C(11)-C(12)-H(13) | 119.5      |
| C(14)-C(13)-C(12) | 120.0(2)   |
| C(14)-C(13)-H(9)  | 120.0      |
| C(12)-C(13)-H(9)  | 120.0      |
| C(15)-C(14)-C(13) | 119.6(2)   |

|                   |            |
|-------------------|------------|
| C(15)-C(14)-H(10) | 120.2      |
| C(13)-C(14)-H(10) | 120.2      |
| C(14)-C(15)-C(16) | 120.6(2)   |
| C(14)-C(15)-H(11) | 119.7      |
| C(16)-C(15)-H(11) | 119.7      |
| C(15)-C(16)-C(11) | 120.47(19) |
| C(15)-C(16)-H(12) | 119.8      |
| C(11)-C(16)-H(12) | 119.8      |
| N(2)-C(17)-Se(2)  | 179.2(2)   |
| N(2)-C(18)-C(19)  | 109.99(17) |
| N(2)-C(18)-H(29)  | 109.7      |
| C(19)-C(18)-H(29) | 109.7      |
| N(2)-C(18)-H(30)  | 109.7      |
| C(19)-C(18)-H(30) | 109.7      |
| H(29)-C(18)-H(30) | 108.2      |
| C(18)-C(19)-C(20) | 112.39(16) |
| C(18)-C(19)-H(17) | 109.1      |
| C(20)-C(19)-H(17) | 109.1      |
| C(18)-C(19)-H(16) | 109.1      |
| C(20)-C(19)-H(16) | 109.1      |
| H(17)-C(19)-H(16) | 107.9      |
| C(21)-C(20)-C(27) | 110.87(17) |
| C(21)-C(20)-C(19) | 111.39(17) |
| C(27)-C(20)-C(19) | 111.45(16) |
| C(21)-C(20)-H(28) | 107.6      |
| C(27)-C(20)-H(28) | 107.6      |
| C(19)-C(20)-H(28) | 107.6      |
| C(26)-C(21)-C(22) | 118.0(2)   |
| C(26)-C(21)-C(20) | 121.42(18) |
| C(22)-C(21)-C(20) | 120.54(19) |
| C(23)-C(22)-C(21) | 120.7(2)   |
| C(23)-C(22)-H(22) | 119.7      |
| C(21)-C(22)-H(22) | 119.7      |
| C(24)-C(23)-C(22) | 119.3(2)   |
| C(24)-C(23)-H(18) | 120.4      |
| C(22)-C(23)-H(18) | 120.4      |
| C(25)-C(24)-C(23) | 120.4(2)   |
| C(25)-C(24)-H(19) | 119.8      |
| C(23)-C(24)-H(19) | 119.8      |
| C(24)-C(25)-C(26) | 120.0(2)   |

|                   |            |
|-------------------|------------|
| C(24)-C(25)-H(20) | 120.0      |
| C(26)-C(25)-H(20) | 120.0      |
| C(25)-C(26)-C(21) | 121.6(2)   |
| C(25)-C(26)-H(21) | 119.2      |
| C(21)-C(26)-H(21) | 119.2      |
| C(28)-C(27)-C(32) | 118.36(18) |
| C(28)-C(27)-C(20) | 118.54(17) |
| C(32)-C(27)-C(20) | 123.09(18) |
| C(27)-C(28)-C(29) | 121.03(19) |
| C(27)-C(28)-H(27) | 119.5      |
| C(29)-C(28)-H(27) | 119.5      |
| C(30)-C(29)-C(28) | 119.9(2)   |
| C(30)-C(29)-H(26) | 120.1      |
| C(28)-C(29)-H(26) | 120.1      |
| C(31)-C(30)-C(29) | 119.6(2)   |
| C(31)-C(30)-H(25) | 120.2      |
| C(29)-C(30)-H(25) | 120.2      |
| C(30)-C(31)-C(32) | 120.6(2)   |
| C(30)-C(31)-H(24) | 119.7      |
| C(32)-C(31)-H(24) | 119.7      |
| C(31)-C(32)-C(27) | 120.5(2)   |
| C(31)-C(32)-H(23) | 119.7      |
| C(27)-C(32)-H(23) | 119.7      |

---

Symmetry transformations used to generate equivalent atoms:

Table 4. Anisotropic displacement parameters ( $\text{\AA}^2 \times 10^3$ ) for mo\_140308LT\_0m. The anisotropic displacement factor exponent takes the form:  $-2\pi^2 [ h^2 a^{*2} U^{11} + \dots + 2 h k a^* b^* U^{12} ]$

| U <sup>11</sup> | U <sup>22</sup> | U <sup>33</sup> | U <sup>23</sup> | U <sup>13</sup> | U <sup>12</sup> |       |
|-----------------|-----------------|-----------------|-----------------|-----------------|-----------------|-------|
| Se(1)           | 27(1)           | 19(1)           | 43(1)           | 8(1)            | 10(1)           | 6(1)  |
| Se(2)           | 24(1)           | 20(1)           | 27(1)           | -3(1)           | 3(1)            | 2(1)  |
| N(1)            | 26(1)           | 20(1)           | 38(1)           | 7(1)            | 2(1)            | 5(1)  |
| N(2)            | 26(1)           | 26(1)           | 35(1)           | -8(1)           | 6(1)            | 3(1)  |
| C(1)            | 17(1)           | 26(1)           | 22(1)           | 3(1)            | 4(1)            | 0(1)  |
| C(2)            | 20(1)           | 16(1)           | 31(1)           | 4(1)            | 2(1)            | 5(1)  |
| C(3)            | 16(1)           | 16(1)           | 27(1)           | 0(1)            | 6(1)            | 2(1)  |
| C(4)            | 10(1)           | 14(1)           | 20(1)           | -2(1)           | 2(1)            | 0(1)  |
| C(5)            | 14(1)           | 10(1)           | 21(1)           | 3(1)            | 3(1)            | 1(1)  |
| C(6)            | 19(1)           | 19(1)           | 25(1)           | -2(1)           | 2(1)            | -1(1) |
| C(7)            | 27(1)           | 23(1)           | 24(1)           | -3(1)           | 7(1)            | 1(1)  |
| C(8)            | 23(1)           | 20(1)           | 32(1)           | 5(1)            | 14(1)           | 8(1)  |
| C(9)            | 13(1)           | 23(1)           | 32(1)           | 8(1)            | 3(1)            | 2(1)  |
| C(10)           | 18(1)           | 17(1)           | 20(1)           | 3(1)            | 3(1)            | 1(1)  |
| C(11)           | 11(1)           | 18(1)           | 22(1)           | 0(1)            | 5(1)            | 2(1)  |
| C(12)           | 18(1)           | 18(1)           | 24(1)           | -3(1)           | 4(1)            | -1(1) |
| C(13)           | 26(1)           | 18(1)           | 30(1)           | 3(1)            | 7(1)            | -1(1) |
| C(14)           | 25(1)           | 31(1)           | 19(1)           | 3(1)            | 5(1)            | 1(1)  |
| C(15)           | 24(1)           | 29(1)           | 23(1)           | -6(1)           | 2(1)            | -4(1) |
| C(16)           | 20(1)           | 20(1)           | 25(1)           | -2(1)           | 7(1)            | -5(1) |
| C(17)           | 18(1)           | 29(1)           | 18(1)           | -6(1)           | 4(1)            | 1(1)  |
| C(18)           | 24(1)           | 19(1)           | 29(1)           | -4(1)           | 2(1)            | 7(1)  |
| C(19)           | 16(1)           | 17(1)           | 24(1)           | 1(1)            | 3(1)            | 3(1)  |
| C(20)           | 15(1)           | 17(1)           | 22(1)           | 1(1)            | 5(1)            | -1(1) |
| C(21)           | 15(1)           | 13(1)           | 19(1)           | -3(1)           | 1(1)            | 1(1)  |
| C(22)           | 29(1)           | 15(1)           | 25(1)           | -3(1)           | 6(1)            | -1(1) |
| C(23)           | 30(1)           | 20(1)           | 25(1)           | -1(1)           | -7(1)           | 3(1)  |
| C(24)           | 19(1)           | 20(1)           | 39(1)           | -8(1)           | -3(1)           | 5(1)  |
| C(25)           | 19(1)           | 25(1)           | 34(1)           | -6(1)           | 5(1)            | -1(1) |
| C(26)           | 22(1)           | 19(1)           | 22(1)           | -3(1)           | 5(1)            | 0(1)  |
| C(27)           | 11(1)           | 20(1)           | 21(1)           | 0(1)            | -1(1)           | 4(1)  |
| C(28)           | 20(1)           | 22(1)           | 23(1)           | 8(1)            | 0(1)            | 3(1)  |
| C(29)           | 26(1)           | 22(1)           | 33(1)           | -5(1)           | -4(1)           | -1(1) |
| C(30)           | 20(1)           | 43(1)           | 20(1)           | -6(1)           | -2(1)           | 10(1) |
| C(31)           | 20(1)           | 37(1)           | 24(1)           | 10(1)           | 8(1)            | 4(1)  |

C(32) 17(1) 22(1) 30(1) 4(1) 4(1) -2(1)

---



Table 5. Hydrogen coordinates ( $\times 10^4$ ) and isotropic displacement parameters ( $\text{\AA}^2 \times 10^{-3}$ ) for mo\_140308LT\_0m.

| x     | y    | z    | U(eq) |    |
|-------|------|------|-------|----|
| H(1)  | 6675 | 8040 | 920   | 28 |
| H(15) | 5635 | 7607 | 904   | 28 |
| H(3)  | 5798 | 8142 | 2191  | 23 |
| H(2)  | 6862 | 8382 | 2183  | 23 |
| H(14) | 5957 | 5885 | 1811  | 18 |
| H(8)  | 6582 | 5253 | 782   | 25 |
| H(4)  | 7816 | 4716 | 203   | 29 |
| H(5)  | 9302 | 4997 | 811   | 29 |
| H(6)  | 9545 | 5866 | 1993  | 27 |
| H(7)  | 8308 | 6447 | 2564  | 22 |
| H(13) | 6084 | 4079 | 2652  | 24 |
| H(9)  | 6199 | 3366 | 3855  | 29 |
| H(10) | 6787 | 4798 | 4805  | 30 |
| H(11) | 7263 | 6940 | 4543  | 31 |
| H(12) | 7135 | 7672 | 3342  | 25 |
| H(29) | 2662 | -387 | 876   | 29 |
| H(30) | 3682 | 32   | 793   | 29 |
| H(17) | 4130 | -356 | 2079  | 23 |
| H(16) | 3089 | -661 | 2146  | 23 |
| H(28) | 3723 | 1876 | 1696  | 21 |
| H(22) | 2549 | 2420 | 714   | 27 |
| H(18) | 1020 | 2918 | 272   | 31 |
| H(19) | -89  | 2570 | 1020  | 32 |
| H(20) | 322  | 1767 | 2197  | 31 |
| H(21) | 1830 | 1249 | 2628  | 25 |
| H(27) | 3842 | 3709 | 2558  | 27 |
| H(26) | 4240 | 4424 | 3760  | 34 |
| H(25) | 4258 | 2902 | 4715  | 34 |
| H(24) | 3867 | 685  | 4463  | 32 |
| H(23) | 3457 | -31  | 3265  | 27 |

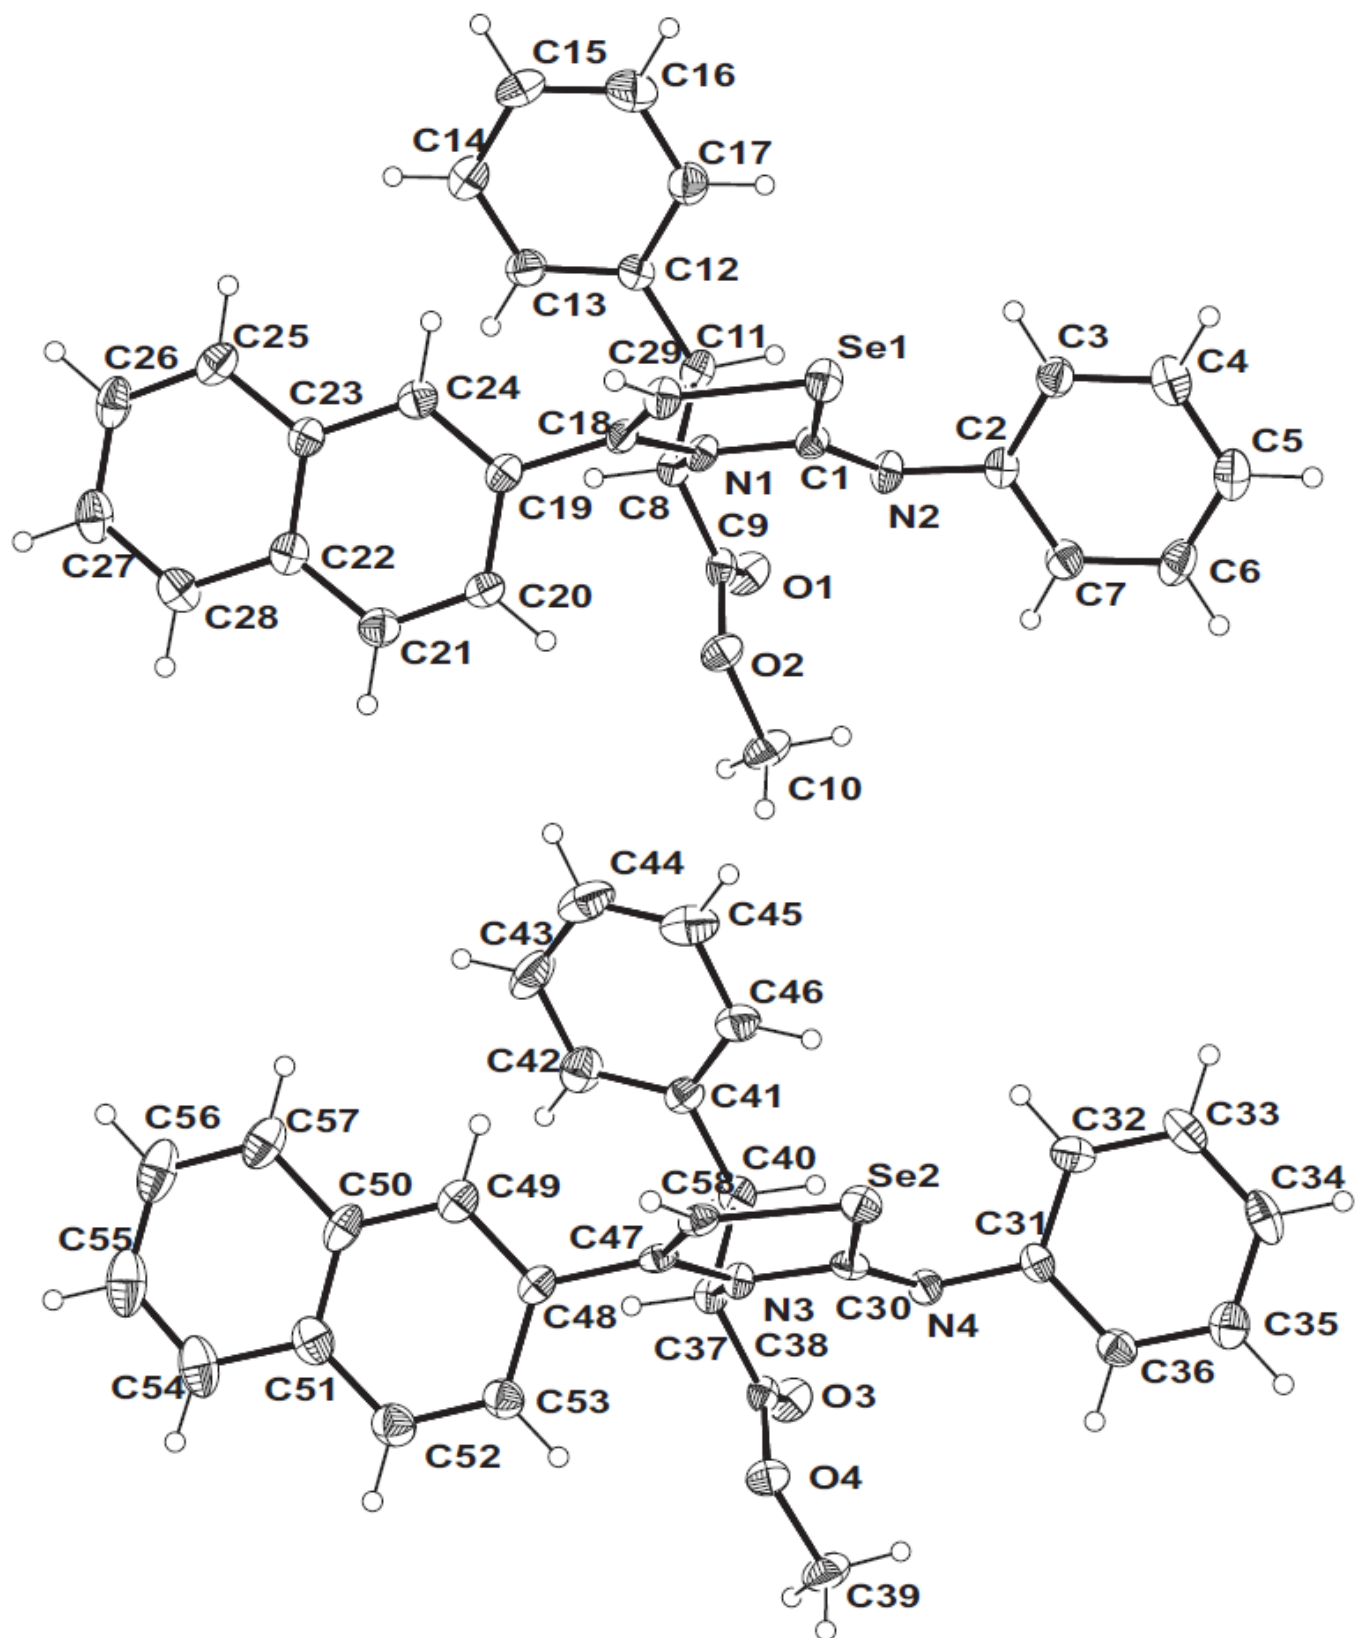

X-Ray ORTEP diagram of 2-iminoselenazole 5f

Table 1. Crystal data and structure refinement for ch13687.

|                                   |                                                                  |          |
|-----------------------------------|------------------------------------------------------------------|----------|
| Identification code               | ch13687                                                          |          |
| Empirical formula                 | C <sub>29</sub> H <sub>24</sub> N <sub>2</sub> O <sub>2</sub> Se |          |
| Formula weight                    | 511.46                                                           |          |
| Temperature                       | 200(2) K                                                         |          |
| Wavelength                        | 0.71073 Å                                                        |          |
| Crystal system                    | Orthorhombic                                                     |          |
| Space group                       | P 21 21 21                                                       |          |
| Unit cell dimensions              | a = 8.7794(3) Å                                                  | α = 90°. |
|                                   | b = 14.6701(4) Å                                                 | β = 90°. |
|                                   | c = 37.5122(10) Å                                                | γ = 90°. |
| Volume                            | 4831.4(2) Å <sup>3</sup>                                         |          |
| Z                                 | 8                                                                |          |
| Density (calculated)              | 1.406 Mg/m <sup>3</sup>                                          |          |
| Absorption coefficient            | 1.583 mm <sup>-1</sup>                                           |          |
| F(000)                            | 2096                                                             |          |
| Crystal size                      | 0.78 x 0.74 x 0.67 mm <sup>3</sup>                               |          |
| Theta range for data collection   | 2.70 to 25.00°.                                                  |          |
| Index ranges                      | -3 ≤ h ≤ 9, -17 ≤ k ≤ 17, -44 ≤ l ≤ 44                           |          |
| Reflections collected             | 19306                                                            |          |
| Independent reflections           | 8037 [R(int) = 0.0336]                                           |          |
| Completeness to theta = 24.99°    | 95.9 %                                                           |          |
| Absorption correction             | multi-scan                                                       |          |
| Max. and min. transmission        | 0.4168 and 0.3714                                                |          |
| Refinement method                 | Full-matrix least-squares on F <sup>2</sup>                      |          |
| Data / restraints / parameters    | 8037 / 0 / 613                                                   |          |
| Goodness-of-fit on F <sup>2</sup> | 1.011                                                            |          |
| Final R indices [I > 2σ(I)]       | R1 = 0.0350, wR2 = 0.0679                                        |          |
| R indices (all data)              | R1 = 0.0453, wR2 = 0.0708                                        |          |
| Absolute structure parameter      | 0.023(7)                                                         |          |
| Largest diff. peak and hole       | 0.279 and -0.581 e.Å <sup>-3</sup>                               |          |

Table 2. Atomic coordinates ( $\times 10^4$ ) and equivalent isotropic displacement parameters ( $\text{\AA}^2 \times 10^3$ ) for ch13687.  $U(\text{eq})$  is defined as one third of the trace of the orthogonalized  $U^{ij}$  tensor.

|       | x        | y        | z        | U(eq) |
|-------|----------|----------|----------|-------|
| C(1)  | 7308(4)  | 489(2)   | 9791(1)  | 28(1) |
| C(2)  | 7920(4)  | 18(2)    | 10373(1) | 30(1) |
| C(3)  | 6801(4)  | 414(2)   | 10581(1) | 38(1) |
| C(4)  | 6487(5)  | 67(3)    | 10917(1) | 48(1) |
| C(5)  | 7285(5)  | -663(3)  | 11049(1) | 48(1) |
| C(6)  | 8414(5)  | -1043(2) | 10847(1) | 45(1) |
| C(7)  | 8753(4)  | -711(2)  | 10513(1) | 37(1) |
| C(8)  | 9257(4)  | 1037(2)  | 9375(1)  | 27(1) |
| C(9)  | 10458(4) | 327(2)   | 9464(1)  | 32(1) |
| C(10) | 11072(5) | -1226(2) | 9462(1)  | 52(1) |
| C(11) | 9619(4)  | 1958(2)  | 9547(1)  | 36(1) |
| C(12) | 8559(4)  | 2697(2)  | 9414(1)  | 32(1) |
| C(13) | 8632(5)  | 3001(2)  | 9064(1)  | 44(1) |
| C(14) | 7650(5)  | 3666(3)  | 8941(1)  | 54(1) |
| C(15) | 6603(6)  | 4049(3)  | 9170(1)  | 58(1) |
| C(16) | 6534(5)  | 3765(3)  | 9518(1)  | 63(1) |
| C(17) | 7502(5)  | 3090(3)  | 9638(1)  | 47(1) |
| C(18) | 6551(4)  | 741(2)   | 9195(1)  | 29(1) |
| C(19) | 6951(4)  | 771(2)   | 8808(1)  | 32(1) |
| C(20) | 7774(4)  | 21(2)    | 8663(1)  | 36(1) |
| C(21) | 8126(5)  | 2(2)     | 8309(1)  | 40(1) |
| C(22) | 7709(4)  | 721(2)   | 8084(1)  | 35(1) |
| C(23) | 6907(4)  | 1481(2)  | 8226(1)  | 33(1) |
| C(24) | 6524(4)  | 1473(2)  | 8596(1)  | 36(1) |
| C(25) | 6564(5)  | 2214(2)  | 8003(1)  | 45(1) |
| C(26) | 6961(5)  | 2201(3)  | 7652(1)  | 46(1) |
| C(27) | 7718(5)  | 1452(3)  | 7504(1)  | 47(1) |
| C(28) | 8084(4)  | 730(2)   | 7712(1)  | 42(1) |
| C(29) | 5154(4)  | 621(2)   | 9324(1)  | 32(1) |
| C(30) | 7617(4)  | 7512(2)  | 8536(1)  | 29(1) |
| C(31) | 7189(4)  | 7385(2)  | 9142(1)  | 30(1) |
| C(32) | 8126(5)  | 6678(2)  | 9253(1)  | 44(1) |
| C(33) | 8614(5)  | 6625(3)  | 9601(1)  | 52(1) |
| C(34) | 8178(5)  | 7282(3)  | 9845(1)  | 48(1) |
| C(35) | 7227(5)  | 7975(3)  | 9742(1)  | 43(1) |

|       |          |         |          |       |
|-------|----------|---------|----------|-------|
| C(36) | 6724(4)  | 8030(2) | 9393(1)  | 36(1) |
| C(37) | 5638(4)  | 7206(2) | 8093(1)  | 30(1) |
| C(38) | 4427(4)  | 7803(2) | 8264(1)  | 30(1) |
| C(39) | 3846(5)  | 9289(2) | 8464(1)  | 52(1) |
| C(40) | 5370(4)  | 6193(2) | 8184(1)  | 36(1) |
| C(41) | 6532(4)  | 5584(2) | 8011(1)  | 37(1) |
| C(42) | 6332(5)  | 5266(2) | 7666(1)  | 50(1) |
| C(43) | 7424(6)  | 4701(3) | 7511(1)  | 63(1) |
| C(44) | 8687(6)  | 4443(3) | 7699(1)  | 63(1) |
| C(45) | 8908(5)  | 4760(3) | 8035(1)  | 60(1) |
| C(46) | 7828(5)  | 5325(2) | 8190(1)  | 45(1) |
| C(47) | 8325(4)  | 7638(2) | 7930(1)  | 27(1) |
| C(48) | 7896(4)  | 7742(2) | 7544(1)  | 30(1) |
| C(49) | 8359(4)  | 7117(2) | 7296(1)  | 38(1) |
| C(50) | 7991(4)  | 7239(2) | 6927(1)  | 39(1) |
| C(51) | 7206(5)  | 8027(3) | 6824(1)  | 45(1) |
| C(52) | 6758(5)  | 8664(2) | 7080(1)  | 45(1) |
| C(53) | 7058(4)  | 8521(2) | 7432(1)  | 38(1) |
| C(54) | 6846(5)  | 8149(3) | 6452(1)  | 59(1) |
| C(55) | 7195(5)  | 7484(4) | 6217(1)  | 67(1) |
| C(56) | 7945(5)  | 6690(4) | 6324(1)  | 62(1) |
| C(57) | 8356(5)  | 6568(3) | 6673(1)  | 51(1) |
| C(58) | 9715(4)  | 7712(2) | 8059(1)  | 31(1) |
| N(1)  | 7714(3)  | 724(2)  | 9448(1)  | 28(1) |
| N(2)  | 8332(3)  | 322(2)  | 10027(1) | 33(1) |
| N(3)  | 7164(3)  | 7512(2) | 8182(1)  | 26(1) |
| N(4)  | 6649(3)  | 7443(2) | 8787(1)  | 30(1) |
| O(1)  | 11720(3) | 514(2)  | 9567(1)  | 46(1) |
| O(2)  | 9994(3)  | -514(1) | 9382(1)  | 39(1) |
| O(3)  | 3198(3)  | 7533(2) | 8357(1)  | 45(1) |
| O(4)  | 4852(3)  | 8677(1) | 8273(1)  | 38(1) |
| Se(1) | 5124(1)  | 435(1)  | 9819(1)  | 35(1) |
| Se(2) | 9790(1)  | 7614(1) | 8558(1)  | 34(1) |

---

Table 3. Bond lengths [ $\text{\AA}$ ] and angles [ $^\circ$ ] for ch13687.

---

|              |          |
|--------------|----------|
| C(1)-N(2)    | 1.285(4) |
| C(1)-N(1)    | 1.379(4) |
| C(1)-Se(1)   | 1.922(3) |
| C(2)-C(3)    | 1.383(5) |
| C(2)-C(7)    | 1.399(4) |
| C(2)-N(2)    | 1.420(4) |
| C(3)-C(4)    | 1.385(5) |
| C(3)-H(3)    | 0.9500   |
| C(4)-C(5)    | 1.373(5) |
| C(4)-H(4)    | 0.9500   |
| C(5)-C(6)    | 1.366(5) |
| C(5)-H(5)    | 0.9500   |
| C(6)-C(7)    | 1.375(4) |
| C(6)-H(6)    | 0.9500   |
| C(7)-H(7)    | 0.9500   |
| C(8)-N(1)    | 1.457(4) |
| C(8)-C(9)    | 1.520(5) |
| C(8)-C(11)   | 1.530(4) |
| C(8)-H(8)    | 1.0000   |
| C(9)-O(1)    | 1.205(4) |
| C(9)-O(2)    | 1.335(4) |
| C(10)-O(2)   | 1.442(4) |
| C(10)-H(10A) | 0.9800   |
| C(10)-H(10B) | 0.9800   |
| C(10)-H(10C) | 0.9800   |
| C(11)-C(12)  | 1.513(5) |
| C(11)-H(11A) | 0.9900   |
| C(11)-H(11B) | 0.9900   |
| C(12)-C(17)  | 1.379(5) |
| C(12)-C(13)  | 1.389(4) |
| C(13)-C(14)  | 1.380(5) |
| C(13)-H(13)  | 0.9500   |
| C(14)-C(15)  | 1.376(6) |
| C(14)-H(14)  | 0.9500   |
| C(15)-C(16)  | 1.372(5) |
| C(15)-H(15)  | 0.9500   |
| C(16)-C(17)  | 1.381(5) |
| C(16)-H(16)  | 0.9500   |

|             |          |
|-------------|----------|
| C(17)-H(17) | 0.9500   |
| C(18)-C(29) | 1.331(5) |
| C(18)-N(1)  | 1.395(4) |
| C(18)-C(19) | 1.491(4) |
| C(19)-C(24) | 1.354(4) |
| C(19)-C(20) | 1.424(4) |
| C(20)-C(21) | 1.365(4) |
| C(20)-H(20) | 0.9500   |
| C(21)-C(22) | 1.399(4) |
| C(21)-H(21) | 0.9500   |
| C(22)-C(23) | 1.421(5) |
| C(22)-C(28) | 1.437(4) |
| C(23)-C(25) | 1.396(4) |
| C(23)-C(24) | 1.430(4) |
| C(24)-H(24) | 0.9500   |
| C(25)-C(26) | 1.362(5) |
| C(25)-H(25) | 0.9500   |
| C(26)-C(27) | 1.398(5) |
| C(26)-H(26) | 0.9500   |
| C(27)-C(28) | 1.355(5) |
| C(27)-H(27) | 0.9500   |
| C(28)-H(28) | 0.9500   |
| C(29)-Se(1) | 1.875(3) |
| C(29)-H(29) | 0.9500   |
| C(30)-N(4)  | 1.272(4) |
| C(30)-N(3)  | 1.388(4) |
| C(30)-Se(2) | 1.916(3) |
| C(31)-C(32) | 1.389(5) |
| C(31)-C(36) | 1.397(4) |
| C(31)-N(4)  | 1.415(4) |
| C(32)-C(33) | 1.373(5) |
| C(32)-H(32) | 0.9500   |
| C(33)-C(34) | 1.384(5) |
| C(33)-H(33) | 0.9500   |
| C(34)-C(35) | 1.372(5) |
| C(34)-H(34) | 0.9500   |
| C(35)-C(36) | 1.381(5) |
| C(35)-H(35) | 0.9500   |
| C(36)-H(36) | 0.9500   |
| C(37)-N(3)  | 1.451(4) |

|              |          |
|--------------|----------|
| C(37)-C(38)  | 1.518(4) |
| C(37)-C(40)  | 1.543(4) |
| C(37)-H(37)  | 1.0000   |
| C(38)-O(3)   | 1.202(4) |
| C(38)-O(4)   | 1.335(4) |
| C(39)-O(4)   | 1.449(4) |
| C(39)-H(39A) | 0.9800   |
| C(39)-H(39B) | 0.9800   |
| C(39)-H(39C) | 0.9800   |
| C(40)-C(41)  | 1.503(5) |
| C(40)-H(40A) | 0.9900   |
| C(40)-H(40B) | 0.9900   |
| C(41)-C(46)  | 1.375(5) |
| C(41)-C(42)  | 1.388(5) |
| C(42)-C(43)  | 1.394(6) |
| C(42)-H(42)  | 0.9500   |
| C(43)-C(44)  | 1.368(6) |
| C(43)-H(43)  | 0.9500   |
| C(44)-C(45)  | 1.355(6) |
| C(44)-H(44)  | 0.9500   |
| C(45)-C(46)  | 1.388(5) |
| C(45)-H(45)  | 0.9500   |
| C(46)-H(46)  | 0.9500   |
| C(47)-C(58)  | 1.318(5) |
| C(47)-N(3)   | 1.404(4) |
| C(47)-C(48)  | 1.502(4) |
| C(48)-C(49)  | 1.369(4) |
| C(48)-C(53)  | 1.422(5) |
| C(49)-C(50)  | 1.433(5) |
| C(49)-H(49)  | 0.9500   |
| C(50)-C(51)  | 1.400(5) |
| C(50)-C(57)  | 1.406(5) |
| C(51)-C(52)  | 1.397(5) |
| C(51)-C(54)  | 1.441(5) |
| C(52)-C(53)  | 1.363(5) |
| C(52)-H(52)  | 0.9500   |
| C(53)-H(53)  | 0.9500   |
| C(54)-C(55)  | 1.349(6) |
| C(54)-H(54)  | 0.9500   |
| C(55)-C(56)  | 1.397(6) |



|                     |          |
|---------------------|----------|
| C(55)-H(55)         | 0.9500   |
| C(56)-C(57)         | 1.369(5) |
| C(56)-H(56)         | 0.9500   |
| C(57)-H(57)         | 0.9500   |
| C(58)-Se(2)         | 1.878(3) |
| C(58)-H(58)         | 0.9500   |
|                     |          |
| N(2)-C(1)-N(1)      | 120.6(3) |
| N(2)-C(1)-Se(1)     | 130.7(2) |
| N(1)-C(1)-Se(1)     | 108.6(2) |
| C(3)-C(2)-C(7)      | 118.6(3) |
| C(3)-C(2)-N(2)      | 124.5(3) |
| C(7)-C(2)-N(2)      | 116.8(3) |
| C(2)-C(3)-C(4)      | 120.1(3) |
| C(2)-C(3)-H(3)      | 120.0    |
| C(4)-C(3)-H(3)      | 120.0    |
| C(5)-C(4)-C(3)      | 120.8(4) |
| C(5)-C(4)-H(4)      | 119.6    |
| C(3)-C(4)-H(4)      | 119.6    |
| C(6)-C(5)-C(4)      | 119.2(4) |
| C(6)-C(5)-H(5)      | 120.4    |
| C(4)-C(5)-H(5)      | 120.4    |
| C(5)-C(6)-C(7)      | 121.2(4) |
| C(5)-C(6)-H(6)      | 119.4    |
| C(7)-C(6)-H(6)      | 119.4    |
| C(6)-C(7)-C(2)      | 120.0(3) |
| C(6)-C(7)-H(7)      | 120.0    |
| C(2)-C(7)-H(7)      | 120.0    |
| N(1)-C(8)-C(9)      | 112.8(3) |
| N(1)-C(8)-C(11)     | 113.1(3) |
| C(9)-C(8)-C(11)     | 111.6(3) |
| N(1)-C(8)-H(8)      | 106.2    |
| C(9)-C(8)-H(8)      | 106.2    |
| C(11)-C(8)-H(8)     | 106.2    |
| O(1)-C(9)-O(2)      | 124.4(3) |
| O(1)-C(9)-C(8)      | 123.5(3) |
| O(2)-C(9)-C(8)      | 111.8(3) |
| O(2)-C(10)-H(10A)   | 109.5    |
| O(2)-C(10)-H(10B)   | 109.5    |
| H(10A)-C(10)-H(10B) | 109.5    |

|                     |          |
|---------------------|----------|
| O(2)-C(10)-H(10C)   | 109.5    |
| H(10A)-C(10)-H(10C) | 109.5    |
| H(10B)-C(10)-H(10C) | 109.5    |
| C(12)-C(11)-C(8)    | 111.4(3) |
| C(12)-C(11)-H(11A)  | 109.3    |
| C(8)-C(11)-H(11A)   | 109.3    |
| C(12)-C(11)-H(11B)  | 109.3    |
| C(8)-C(11)-H(11B)   | 109.3    |
| H(11A)-C(11)-H(11B) | 108.0    |
| C(17)-C(12)-C(13)   | 118.3(3) |
| C(17)-C(12)-C(11)   | 120.8(3) |
| C(13)-C(12)-C(11)   | 120.9(3) |
| C(14)-C(13)-C(12)   | 120.8(4) |
| C(14)-C(13)-H(13)   | 119.6    |
| C(12)-C(13)-H(13)   | 119.6    |
| C(15)-C(14)-C(13)   | 119.9(4) |
| C(15)-C(14)-H(14)   | 120.0    |
| C(13)-C(14)-H(14)   | 120.0    |
| C(16)-C(15)-C(14)   | 119.8(4) |
| C(16)-C(15)-H(15)   | 120.1    |
| C(14)-C(15)-H(15)   | 120.1    |
| C(15)-C(16)-C(17)   | 120.1(4) |
| C(15)-C(16)-H(16)   | 119.9    |
| C(17)-C(16)-H(16)   | 119.9    |
| C(16)-C(17)-C(12)   | 121.0(4) |
| C(16)-C(17)-H(17)   | 119.5    |
| C(12)-C(17)-H(17)   | 119.5    |
| C(29)-C(18)-N(1)    | 115.0(3) |
| C(29)-C(18)-C(19)   | 125.2(3) |
| N(1)-C(18)-C(19)    | 119.3(3) |
| C(24)-C(19)-C(20)   | 120.3(3) |
| C(24)-C(19)-C(18)   | 121.8(3) |
| C(20)-C(19)-C(18)   | 117.9(3) |
| C(21)-C(20)-C(19)   | 120.2(3) |
| C(21)-C(20)-H(20)   | 119.9    |
| C(19)-C(20)-H(20)   | 119.9    |
| C(20)-C(21)-C(22)   | 120.7(3) |
| C(20)-C(21)-H(21)   | 119.6    |
| C(22)-C(21)-H(21)   | 119.6    |
| C(21)-C(22)-C(23)   | 119.8(3) |

|                   |          |
|-------------------|----------|
| C(21)-C(22)-C(28) | 122.2(3) |
| C(23)-C(22)-C(28) | 118.0(3) |
| C(25)-C(23)-C(22) | 119.2(3) |
| C(25)-C(23)-C(24) | 122.6(3) |
| C(22)-C(23)-C(24) | 118.2(3) |
| C(19)-C(24)-C(23) | 120.8(3) |
| C(19)-C(24)-H(24) | 119.6    |
| C(23)-C(24)-H(24) | 119.6    |
| C(26)-C(25)-C(23) | 120.9(4) |
| C(26)-C(25)-H(25) | 119.5    |
| C(23)-C(25)-H(25) | 119.5    |
| C(25)-C(26)-C(27) | 121.1(3) |
| C(25)-C(26)-H(26) | 119.5    |
| C(27)-C(26)-H(26) | 119.5    |
| C(28)-C(27)-C(26) | 119.9(3) |
| C(28)-C(27)-H(27) | 120.1    |
| C(26)-C(27)-H(27) | 120.1    |
| C(27)-C(28)-C(22) | 120.9(4) |
| C(27)-C(28)-H(28) | 119.5    |
| C(22)-C(28)-H(28) | 119.5    |
| C(18)-C(29)-Se(1) | 113.2(3) |
| C(18)-C(29)-H(29) | 123.4    |
| Se(1)-C(29)-H(29) | 123.4    |
| N(4)-C(30)-N(3)   | 121.1(3) |
| N(4)-C(30)-Se(2)  | 129.8(2) |
| N(3)-C(30)-Se(2)  | 109.0(2) |
| C(32)-C(31)-C(36) | 118.4(3) |
| C(32)-C(31)-N(4)  | 121.7(3) |
| C(36)-C(31)-N(4)  | 119.7(3) |
| C(33)-C(32)-C(31) | 120.8(4) |
| C(33)-C(32)-H(32) | 119.6    |
| C(31)-C(32)-H(32) | 119.6    |
| C(32)-C(33)-C(34) | 120.2(4) |
| C(32)-C(33)-H(33) | 119.9    |
| C(34)-C(33)-H(33) | 119.9    |
| C(35)-C(34)-C(33) | 119.8(3) |
| C(35)-C(34)-H(34) | 120.1    |
| C(33)-C(34)-H(34) | 120.1    |
| C(34)-C(35)-C(36) | 120.3(4) |
| C(34)-C(35)-H(35) | 119.8    |

|                     |          |
|---------------------|----------|
| C(36)-C(35)-H(35)   | 119.8    |
| C(35)-C(36)-C(31)   | 120.4(3) |
| C(35)-C(36)-H(36)   | 119.8    |
| C(31)-C(36)-H(36)   | 119.8    |
| N(3)-C(37)-C(38)    | 111.8(3) |
| N(3)-C(37)-C(40)    | 112.9(3) |
| C(38)-C(37)-C(40)   | 110.9(3) |
| N(3)-C(37)-H(37)    | 107.0    |
| C(38)-C(37)-H(37)   | 107.0    |
| C(40)-C(37)-H(37)   | 107.0    |
| O(3)-C(38)-O(4)     | 124.0(3) |
| O(3)-C(38)-C(37)    | 124.1(3) |
| O(4)-C(38)-C(37)    | 111.7(3) |
| O(4)-C(39)-H(39A)   | 109.5    |
| O(4)-C(39)-H(39B)   | 109.5    |
| H(39A)-C(39)-H(39B) | 109.5    |
| O(4)-C(39)-H(39C)   | 109.5    |
| H(39A)-C(39)-H(39C) | 109.5    |
| H(39B)-C(39)-H(39C) | 109.5    |
| C(41)-C(40)-C(37)   | 111.9(3) |
| C(41)-C(40)-H(40A)  | 109.2    |
| C(37)-C(40)-H(40A)  | 109.2    |
| C(41)-C(40)-H(40B)  | 109.2    |
| C(37)-C(40)-H(40B)  | 109.2    |
| H(40A)-C(40)-H(40B) | 107.9    |
| C(46)-C(41)-C(42)   | 117.9(4) |
| C(46)-C(41)-C(40)   | 121.0(3) |
| C(42)-C(41)-C(40)   | 121.1(4) |
| C(41)-C(42)-C(43)   | 120.1(4) |
| C(41)-C(42)-H(42)   | 119.9    |
| C(43)-C(42)-H(42)   | 119.9    |
| C(44)-C(43)-C(42)   | 120.4(4) |
| C(44)-C(43)-H(43)   | 119.8    |
| C(42)-C(43)-H(43)   | 119.8    |
| C(45)-C(44)-C(43)   | 120.1(4) |
| C(45)-C(44)-H(44)   | 120.0    |
| C(43)-C(44)-H(44)   | 120.0    |
| C(44)-C(45)-C(46)   | 119.8(4) |
| C(44)-C(45)-H(45)   | 120.1    |
| C(46)-C(45)-H(45)   | 120.1    |

|                   |          |
|-------------------|----------|
| C(41)-C(46)-C(45) | 121.7(4) |
| C(41)-C(46)-H(46) | 119.2    |
| C(45)-C(46)-H(46) | 119.2    |
| C(58)-C(47)-N(3)  | 115.8(3) |
| C(58)-C(47)-C(48) | 125.3(3) |
| N(3)-C(47)-C(48)  | 118.7(3) |
| C(49)-C(48)-C(53) | 119.4(3) |
| C(49)-C(48)-C(47) | 120.8(3) |
| C(53)-C(48)-C(47) | 119.7(3) |
| C(48)-C(49)-C(50) | 120.5(3) |
| C(48)-C(49)-H(49) | 119.8    |
| C(50)-C(49)-H(49) | 119.8    |
| C(51)-C(50)-C(57) | 120.3(4) |
| C(51)-C(50)-C(49) | 118.7(3) |
| C(57)-C(50)-C(49) | 121.0(4) |
| C(52)-C(51)-C(50) | 120.1(3) |
| C(52)-C(51)-C(54) | 121.4(4) |
| C(50)-C(51)-C(54) | 118.5(4) |
| C(53)-C(52)-C(51) | 120.6(4) |
| C(53)-C(52)-H(52) | 119.7    |
| C(51)-C(52)-H(52) | 119.7    |
| C(52)-C(53)-C(48) | 120.7(3) |
| C(52)-C(53)-H(53) | 119.7    |
| C(48)-C(53)-H(53) | 119.7    |
| C(55)-C(54)-C(51) | 119.5(4) |
| C(55)-C(54)-H(54) | 120.3    |
| C(51)-C(54)-H(54) | 120.3    |
| C(54)-C(55)-C(56) | 121.5(4) |
| C(54)-C(55)-H(55) | 119.3    |
| C(56)-C(55)-H(55) | 119.3    |
| C(57)-C(56)-C(55) | 120.5(4) |
| C(57)-C(56)-H(56) | 119.7    |
| C(55)-C(56)-H(56) | 119.7    |
| C(56)-C(57)-C(50) | 119.7(4) |
| C(56)-C(57)-H(57) | 120.2    |
| C(50)-C(57)-H(57) | 120.2    |
| C(47)-C(58)-Se(2) | 113.2(2) |
| C(47)-C(58)-H(58) | 123.4    |
| Se(2)-C(58)-H(58) | 123.4    |
| C(1)-N(1)-C(18)   | 116.8(3) |

|                   |           |
|-------------------|-----------|
| C(1)-N(1)-C(8)    | 119.6(3)  |
| C(18)-N(1)-C(8)   | 123.2(3)  |
| C(1)-N(2)-C(2)    | 120.8(3)  |
| C(30)-N(3)-C(47)  | 115.9(3)  |
| C(30)-N(3)-C(37)  | 118.9(3)  |
| C(47)-N(3)-C(37)  | 123.9(3)  |
| C(30)-N(4)-C(31)  | 118.5(3)  |
| C(9)-O(2)-C(10)   | 115.0(3)  |
| C(38)-O(4)-C(39)  | 116.0(3)  |
| C(29)-Se(1)-C(1)  | 85.75(15) |
| C(58)-Se(2)-C(30) | 85.94(15) |

---

Symmetry transformations used to generate equivalent atoms:

Table 4. Anisotropic displacement parameters ( $\text{\AA}^2 \times 10^3$ ) for ch13687. The anisotropic displacement factor exponent takes the form:  $-2\pi^2 [ h^2 a^{*2} U^{11} + \dots + 2 h k a^* b^* U^{12} ]$

|       | U <sup>11</sup> | U <sup>22</sup> | U <sup>33</sup> | U <sup>23</sup> | U <sup>13</sup> | U <sup>12</sup> |
|-------|-----------------|-----------------|-----------------|-----------------|-----------------|-----------------|
| C(1)  | 27(2)           | 26(2)           | 31(2)           | 4(2)            | 1(2)            | 0(2)            |
| C(2)  | 25(2)           | 34(2)           | 30(2)           | 2(2)            | -3(2)           | -9(2)           |
| C(3)  | 40(2)           | 41(2)           | 34(2)           | 3(2)            | -2(2)           | 1(2)            |
| C(4)  | 46(3)           | 60(3)           | 37(2)           | -1(2)           | 3(2)            | -6(2)           |
| C(5)  | 55(3)           | 54(3)           | 33(2)           | 7(2)            | -3(2)           | -14(2)          |
| C(6)  | 53(3)           | 43(2)           | 39(2)           | 11(2)           | -15(2)          | -4(2)           |
| C(7)  | 33(2)           | 44(2)           | 35(2)           | 0(2)            | -4(2)           | 4(2)            |
| C(8)  | 17(2)           | 34(2)           | 29(2)           | 4(2)            | 0(1)            | -3(1)           |
| C(9)  | 27(2)           | 42(2)           | 28(2)           | 8(2)            | 5(2)            | -3(2)           |
| C(10) | 45(3)           | 42(2)           | 68(3)           | 12(2)           | -5(2)           | 16(2)           |
| C(11) | 32(2)           | 37(2)           | 38(2)           | 8(2)            | -4(2)           | -6(2)           |
| C(12) | 29(2)           | 31(2)           | 37(2)           | -1(2)           | 2(2)            | -4(2)           |
| C(13) | 46(3)           | 40(2)           | 47(2)           | 4(2)            | 6(2)            | 7(2)            |
| C(14) | 63(3)           | 50(2)           | 50(2)           | 10(2)           | -2(2)           | 8(2)            |
| C(15) | 58(3)           | 47(2)           | 70(3)           | 7(2)            | -6(2)           | 22(2)           |
| C(16) | 54(3)           | 66(3)           | 68(3)           | -7(2)           | 10(2)           | 17(3)           |
| C(17) | 46(3)           | 52(2)           | 44(2)           | 5(2)            | 3(2)            | 6(2)            |
| C(18) | 29(2)           | 29(2)           | 29(2)           | 6(1)            | -1(2)           | 5(2)            |
| C(19) | 23(2)           | 35(2)           | 37(2)           | 5(2)            | -4(2)           | -1(2)           |
| C(20) | 37(2)           | 31(2)           | 40(2)           | 2(2)            | -2(2)           | 4(2)            |
| C(21) | 41(3)           | 36(2)           | 43(2)           | -1(2)           | 1(2)            | -1(2)           |
| C(22) | 28(2)           | 36(2)           | 39(2)           | 4(2)            | -1(2)           | -11(2)          |
| C(23) | 25(2)           | 37(2)           | 35(2)           | 2(2)            | -4(2)           | -1(2)           |
| C(24) | 28(2)           | 39(2)           | 40(2)           | 0(2)            | -2(2)           | 2(2)            |
| C(25) | 44(3)           | 41(2)           | 49(2)           | 9(2)            | -10(2)          | 3(2)            |
| C(26) | 52(3)           | 48(2)           | 38(2)           | 15(2)           | -10(2)          | -18(2)          |
| C(27) | 50(3)           | 55(2)           | 35(2)           | 8(2)            | 0(2)            | -23(2)          |
| C(28) | 40(3)           | 43(2)           | 41(2)           | -5(2)           | 6(2)            | -14(2)          |
| C(29) | 19(2)           | 43(2)           | 34(2)           | 4(1)            | -5(2)           | 0(2)            |
| C(30) | 24(2)           | 24(2)           | 38(2)           | 2(2)            | -3(2)           | 4(2)            |
| C(31) | 26(2)           | 35(2)           | 29(2)           | 6(2)            | 0(2)            | -6(2)           |
| C(32) | 46(3)           | 35(2)           | 50(2)           | 4(2)            | -2(2)           | 6(2)            |
| C(33) | 57(3)           | 53(2)           | 45(2)           | 17(2)           | -11(2)          | 8(2)            |
| C(34) | 48(3)           | 63(3)           | 33(2)           | 20(2)           | -6(2)           | -15(2)          |
| C(35) | 42(3)           | 49(2)           | 38(2)           | 2(2)            | 6(2)            | -9(2)           |

|       |       |        |       |        |       |        |
|-------|-------|--------|-------|--------|-------|--------|
| C(36) | 30(2) | 38(2)  | 39(2) | 5(2)   | 2(2)  | 3(2)   |
| C(37) | 22(2) | 36(2)  | 31(2) | 0(2)   | 4(1)  | -4(2)  |
| C(38) | 22(2) | 40(2)  | 28(2) | -3(2)  | -6(2) | 2(2)   |
| C(39) | 44(3) | 50(2)  | 61(3) | -15(2) | 1(2)  | 16(2)  |
| C(40) | 31(2) | 37(2)  | 38(2) | 1(2)   | 4(2)  | -5(2)  |
| C(41) | 40(2) | 27(2)  | 42(2) | -1(2)  | 10(2) | -6(2)  |
| C(42) | 55(3) | 46(2)  | 50(2) | -8(2)  | -1(2) | -10(2) |
| C(43) | 91(4) | 42(2)  | 55(3) | -21(2) | 22(3) | -10(3) |
| C(44) | 66(4) | 36(2)  | 86(3) | -11(2) | 27(3) | 0(2)   |
| C(45) | 51(3) | 40(2)  | 89(3) | -2(2)  | 8(3)  | 3(2)   |
| C(46) | 50(3) | 33(2)  | 54(2) | -2(2)  | 2(2)  | 2(2)   |
| C(47) | 25(2) | 17(2)  | 38(2) | -2(1)  | 7(2)  | -1(2)  |
| C(48) | 22(2) | 31(2)  | 35(2) | -5(2)  | 9(2)  | -8(2)  |
| C(49) | 32(2) | 41(2)  | 42(2) | -4(2)  | 6(2)  | -6(2)  |
| C(50) | 26(2) | 51(2)  | 39(2) | -15(2) | 11(2) | -11(2) |
| C(51) | 39(3) | 51(2)  | 46(2) | 10(2)  | 7(2)  | -12(2) |
| C(52) | 48(3) | 39(2)  | 49(2) | 5(2)   | 3(2)  | -6(2)  |
| C(53) | 39(3) | 34(2)  | 41(2) | 4(2)   | 2(2)  | -4(2)  |
| C(54) | 52(3) | 85(3)  | 41(2) | 13(2)  | 1(2)  | -20(2) |
| C(55) | 50(3) | 112(4) | 41(2) | -1(3)  | 5(2)  | -23(3) |
| C(56) | 41(3) | 102(4) | 42(2) | -20(2) | 9(2)  | -15(3) |
| C(57) | 39(3) | 67(3)  | 48(2) | -17(2) | 9(2)  | -5(2)  |
| C(58) | 27(2) | 28(2)  | 39(2) | -2(1)  | 9(2)  | 5(2)   |
| N(1)  | 18(2) | 33(2)  | 32(2) | 8(1)   | -3(1) | 2(1)   |
| N(2)  | 25(2) | 43(2)  | 32(2) | 9(1)   | -4(1) | -3(2)  |
| N(3)  | 21(2) | 31(2)  | 26(1) | -1(1)  | 2(1)  | -4(1)  |
| N(4)  | 24(2) | 37(2)  | 29(2) | 2(1)   | 4(1)  | 4(1)   |
| O(1)  | 23(2) | 49(2)  | 65(2) | 9(1)   | -5(1) | -2(1)  |
| O(2)  | 31(1) | 35(1)  | 49(1) | 5(1)   | -4(1) | 2(1)   |
| O(3)  | 26(2) | 54(2)  | 56(2) | -6(2)  | 9(1)  | -6(2)  |
| O(4)  | 30(2) | 35(1)  | 49(1) | -3(1)  | 1(1)  | 1(1)   |
| Se(1) | 23(1) | 47(1)  | 35(1) | 7(1)   | 3(1)  | 0(1)   |
| Se(2) | 24(1) | 38(1)  | 39(1) | 1(1)   | -2(1) | 2(1)   |

---



Table 5. Hydrogen coordinates ( $\times 10^4$ ) and isotropic displacement parameters ( $\text{\AA}^2 \times 10^3$ ) for ch13687.

|        | x     | y     | z     | U(eq) |
|--------|-------|-------|-------|-------|
| H(3)   | 6247  | 924   | 10494 | 46    |
| H(4)   | 5709  | 339   | 11057 | 57    |
| H(5)   | 7054  | -902  | 11278 | 57    |
| H(6)   | 8975  | -1544 | 10939 | 54    |
| H(7)   | 9553  | -977  | 10378 | 45    |
| H(8)   | 9317  | 1135  | 9111  | 32    |
| H(10A) | 10639 | -1817 | 9393  | 78    |
| H(10B) | 11295 | -1226 | 9717  | 78    |
| H(10C) | 12014 | -1121 | 9328  | 78    |
| H(11A) | 9521  | 1905  | 9809  | 43    |
| H(11B) | 10684 | 2129  | 9492  | 43    |
| H(13)  | 9368  | 2749  | 8906  | 53    |
| H(14)  | 7696  | 3859  | 8700  | 65    |
| H(15)  | 5931  | 4510  | 9087  | 70    |
| H(16)  | 5819  | 4033  | 9676  | 75    |
| H(17)  | 7439  | 2894  | 9879  | 57    |
| H(20)  | 8079  | -467  | 8814  | 43    |
| H(21)  | 8660  | -506  | 8214  | 48    |
| H(24)  | 5964  | 1967  | 8695  | 43    |
| H(25)  | 6048  | 2729  | 8097  | 53    |
| H(26)  | 6719  | 2708  | 7505  | 55    |
| H(27)  | 7975  | 1450  | 7258  | 56    |
| H(28)  | 8595  | 223   | 7610  | 50    |
| H(29)  | 4262  | 629   | 9181  | 39    |
| H(32)  | 8434  | 6224  | 9087  | 52    |
| H(33)  | 9253  | 6137  | 9673  | 62    |
| H(34)  | 8536  | 7253  | 10084 | 58    |
| H(35)  | 6913  | 8420  | 9910  | 52    |
| H(36)  | 6057  | 8508  | 9324  | 43    |
| H(37)  | 5522  | 7269  | 7829  | 36    |
| H(39A) | 4262  | 9909  | 8455  | 78    |
| H(39B) | 3760  | 9092  | 8712  | 78    |
| H(39C) | 2837  | 9282  | 8352  | 78    |
| H(40A) | 5414  | 6111  | 8446  | 43    |

|        |       |      |      |    |
|--------|-------|------|------|----|
| H(40B) | 4340  | 6012 | 8103 | 43 |
| H(42)  | 5450  | 5434 | 7535 | 60 |
| H(43)  | 7290  | 4493 | 7273 | 75 |
| H(44)  | 9409  | 4042 | 7595 | 75 |
| H(45)  | 9800  | 4595 | 8163 | 72 |
| H(46)  | 7988  | 5537 | 8427 | 54 |
| H(49)  | 8927  | 6598 | 7369 | 46 |
| H(52)  | 6238  | 9202 | 7008 | 55 |
| H(53)  | 6704  | 8945 | 7605 | 46 |
| H(54)  | 6366  | 8693 | 6373 | 71 |
| H(55)  | 6924  | 7557 | 5974 | 81 |
| H(56)  | 8172  | 6231 | 6154 | 74 |
| H(57)  | 8886  | 6032 | 6743 | 61 |
| H(58)  | 10591 | 7806 | 7915 | 38 |

---

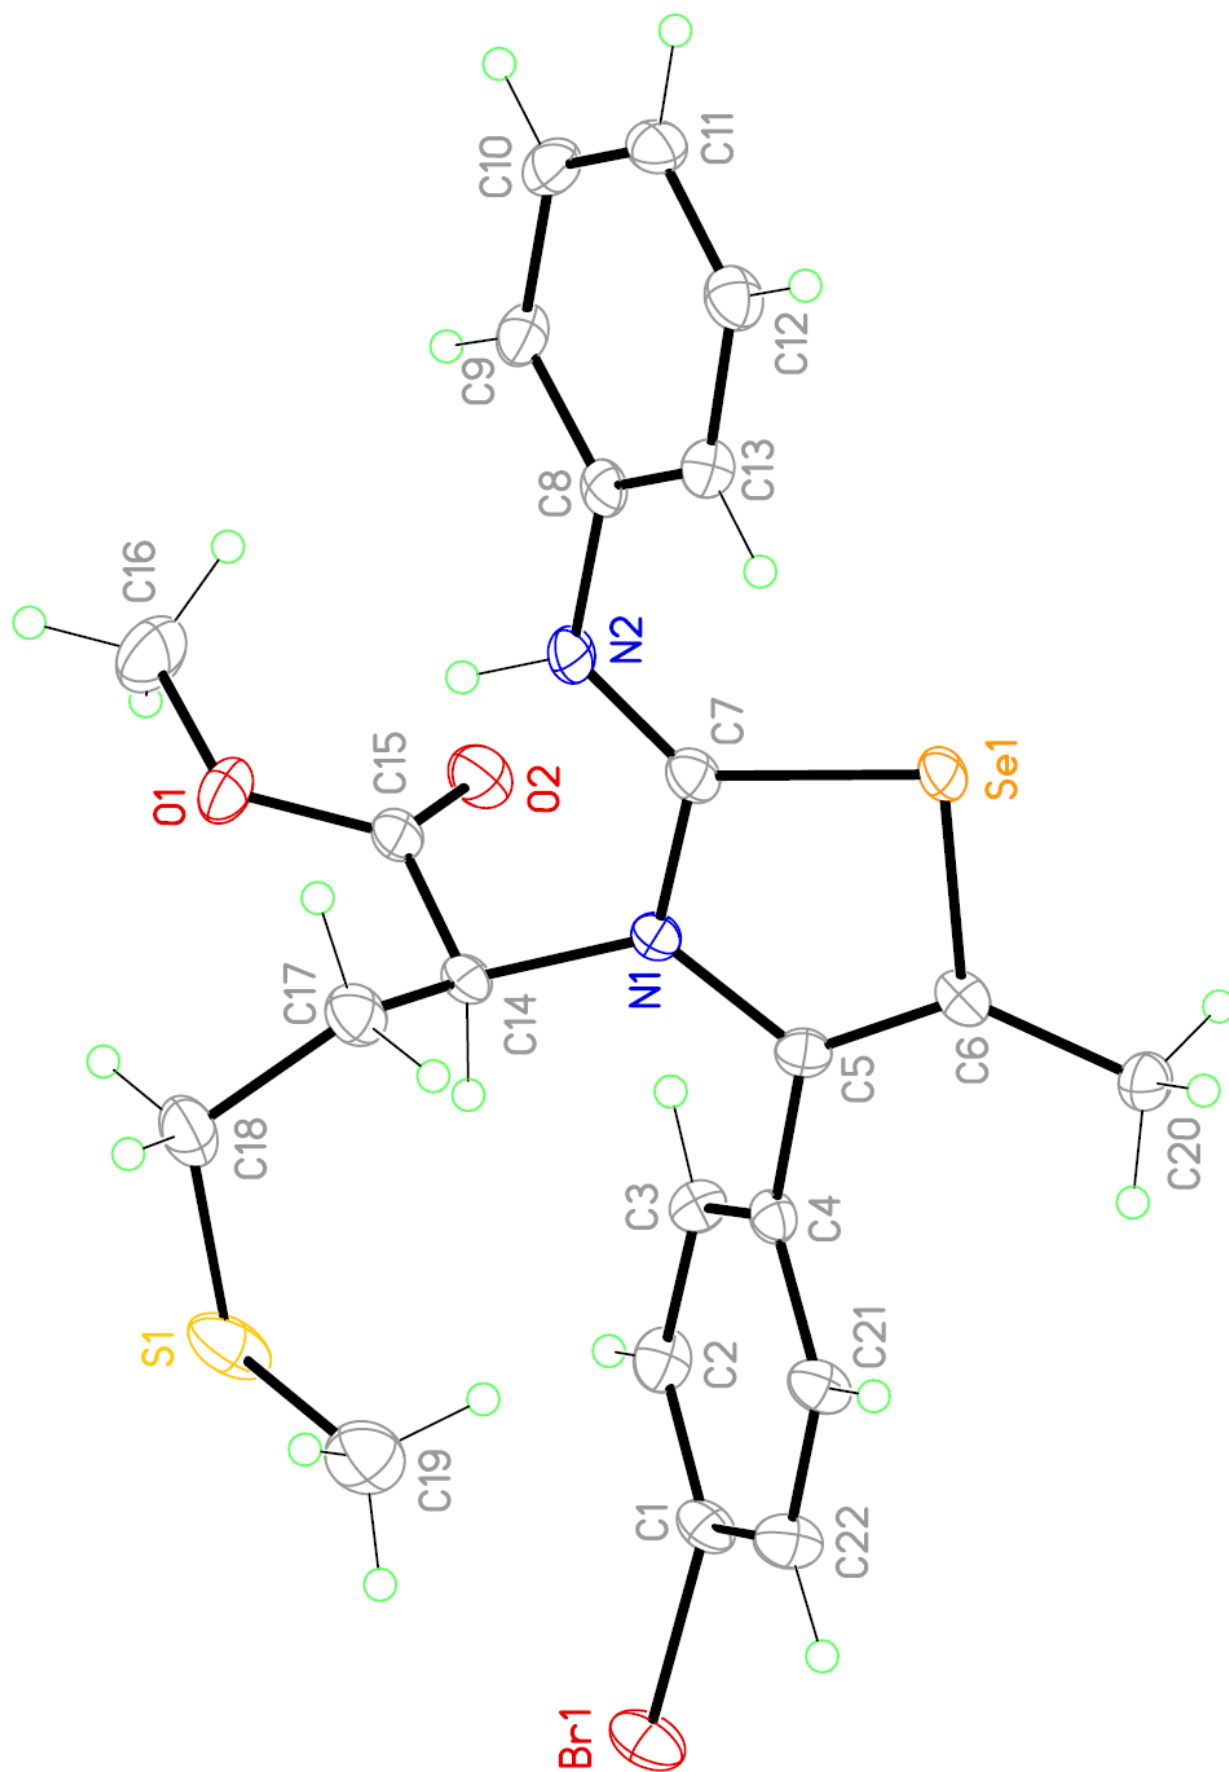

**X-Ray ORTEP diagram of 2-iminoselenazole 7a**

Table 1. Crystal data and structure refinement for mo\_111153lt\_0m.

|                                   |                                                                       |                             |
|-----------------------------------|-----------------------------------------------------------------------|-----------------------------|
| Identification code               | mo_111153lt_0m                                                        |                             |
| Empirical formula                 | C <sub>22</sub> H <sub>24</sub> Br N <sub>2</sub> O <sub>2</sub> S Se |                             |
| Formula weight                    | 539.36                                                                |                             |
| Temperature                       | 100(2) K                                                              |                             |
| Wavelength                        | 0.71073 Å                                                             |                             |
| Crystal system                    | Monoclinic                                                            |                             |
| Space group                       | P 1 21 1                                                              |                             |
| Unit cell dimensions              | a = 11.244(2) Å                                                       | $\alpha = 90^\circ$ .       |
|                                   | b = 7.6728(14) Å                                                      | $\beta = 98.983(4)^\circ$ . |
|                                   | c = 12.837(2) Å                                                       | $\gamma = 90^\circ$ .       |
| Volume                            | 1093.9(3) Å <sup>3</sup>                                              |                             |
| Z                                 | 2                                                                     |                             |
| Density (calculated)              | 1.637 Mg/m <sup>3</sup>                                               |                             |
| Absorption coefficient            | 3.659 mm <sup>-1</sup>                                                |                             |
| F(000)                            | 542                                                                   |                             |
| Crystal size                      | 0.25 x 0.12 x 0.12 mm <sup>3</sup>                                    |                             |
| Theta range for data collection   | 1.61 to 26.52°.                                                       |                             |
| Index ranges                      | -14 ≤ h ≤ 14, -9 ≤ k ≤ 5, -15 ≤ l ≤ 16                                |                             |
| Reflections collected             | 8706                                                                  |                             |
| Independent reflections           | 3751 [R(int) = 0.0186]                                                |                             |
| Completeness to theta = 26.52°    | 99.1 %                                                                |                             |
| Absorption correction             | Semi-empirical from equivalents                                       |                             |
| Max. and min. transmission        | 0.9486 and 0.8045                                                     |                             |
| Refinement method                 | Full-matrix least-squares on F <sup>2</sup>                           |                             |
| Data / restraints / parameters    | 3751 / 1 / 265                                                        |                             |
| Goodness-of-fit on F <sup>2</sup> | 1.034                                                                 |                             |
| Final R indices [I > 2σ(I)]       | R1 = 0.0185, wR2 = 0.0409                                             |                             |
| R indices (all data)              | R1 = 0.0210, wR2 = 0.0414                                             |                             |
| Absolute structure parameter      | 0.004(6)                                                              |                             |
| Largest diff. peak and hole       | 0.271 and -0.617 e.Å <sup>-3</sup>                                    |                             |

Table 2. Atomic coordinates ( $\times 10^4$ ) and equivalent isotropic displacement parameters ( $\text{\AA}^2 \times 10^3$ ) for mo\_111153lt\_0m.  $U(\text{eq})$  is defined as one third of the trace of the orthogonalized  $U^{ij}$  tensor.

|       | x        | y       | z        | U(eq) |
|-------|----------|---------|----------|-------|
| Br(1) | -4860(1) | 3670(1) | 4803(1)  | 25(1) |
| Se(1) | 425(1)   | 3910(1) | 10640(1) | 18(1) |
| S(1)  | -350(1)  | 6482(1) | 5437(1)  | 31(1) |
| N(2)  | 2288(2)  | 3680(3) | 9304(1)  | 19(1) |
| O(2)  | 1153(2)  | 1076(2) | 7488(1)  | 24(1) |
| N(1)  | 293(2)   | 3932(3) | 8530(1)  | 17(1) |
| O(1)  | 2327(2)  | 2973(2) | 6794(1)  | 25(1) |
| C(1)  | -3684(2) | 3664(4) | 6044(2)  | 17(1) |
| C(2)  | -2803(2) | 2392(3) | 6174(2)  | 19(1) |
| C(3)  | -1922(2) | 2455(3) | 7055(2)  | 17(1) |
| C(4)  | -1893(2) | 3785(4) | 7795(2)  | 15(1) |
| C(5)  | -919(2)  | 3886(3) | 8709(2)  | 15(1) |
| C(6)  | -1070(2) | 3877(4) | 9725(2)  | 16(1) |
| C(7)  | 1175(2)  | 3827(4) | 9398(2)  | 17(1) |
| C(8)  | 3216(2)  | 3555(3) | 10169(2) | 16(1) |
| C(9)  | 4159(2)  | 2398(3) | 10094(2) | 19(1) |
| C(10) | 5085(2)  | 2197(3) | 10924(2) | 21(1) |
| C(11) | 5131(2)  | 3172(3) | 11833(2) | 21(1) |
| C(12) | 4220(2)  | 4364(3) | 11907(2) | 22(1) |
| C(13) | 3268(2)  | 4571(3) | 11083(2) | 18(1) |
| C(14) | 663(2)   | 4135(3) | 7486(2)  | 16(1) |
| C(15) | 1400(2)  | 2533(4) | 7287(2)  | 19(1) |
| C(16) | 3066(3)  | 1513(4) | 6580(3)  | 37(1) |
| C(17) | 1221(3)  | 5915(4) | 7355(2)  | 22(1) |
| C(18) | 1144(3)  | 6480(3) | 6200(2)  | 26(1) |
| C(19) | -1076(3) | 8127(4) | 6116(2)  | 33(1) |
| C(20) | -2206(2) | 3737(4) | 10191(2) | 20(1) |
| C(21) | -2812(2) | 5028(3) | 7654(2)  | 18(1) |
| C(22) | -3714(2) | 4965(3) | 6787(2)  | 22(1) |

Table 3. Bond lengths [ $\text{\AA}$ ] and angles [ $^\circ$ ] for mo\_111153lt\_0m.

---

|             |            |
|-------------|------------|
| Br(1)-C(1)  | 1.905(2)   |
| Se(1)-C(6)  | 1.895(2)   |
| Se(1)-C(7)  | 1.9174(19) |
| S(1)-C(19)  | 1.800(3)   |
| S(1)-C(18)  | 1.808(3)   |
| N(2)-C(7)   | 1.281(3)   |
| N(2)-C(8)   | 1.403(3)   |
| N(2)-H(2)   | 0.8800     |
| O(2)-C(15)  | 1.190(3)   |
| N(1)-C(7)   | 1.373(3)   |
| N(1)-C(5)   | 1.418(2)   |
| N(1)-C(14)  | 1.473(3)   |
| O(1)-C(15)  | 1.344(3)   |
| O(1)-C(16)  | 1.446(3)   |
| C(1)-C(2)   | 1.382(3)   |
| C(1)-C(22)  | 1.385(3)   |
| C(2)-C(3)   | 1.383(3)   |
| C(2)-H(2A)  | 0.9500     |
| C(3)-C(4)   | 1.391(3)   |
| C(3)-H(3)   | 0.9500     |
| C(4)-C(21)  | 1.397(3)   |
| C(4)-C(5)   | 1.476(3)   |
| C(5)-C(6)   | 1.342(3)   |
| C(6)-C(20)  | 1.496(3)   |
| C(8)-C(9)   | 1.398(3)   |
| C(8)-C(13)  | 1.402(3)   |
| C(9)-C(10)  | 1.377(4)   |
| C(9)-H(9)   | 0.9500     |
| C(10)-C(11) | 1.380(3)   |
| C(10)-H(10) | 0.9500     |
| C(11)-C(12) | 1.387(3)   |
| C(11)-H(11) | 0.9500     |
| C(12)-C(13) | 1.392(4)   |
| C(12)-H(12) | 0.9500     |
| C(13)-H(13) | 0.9500     |
| C(14)-C(17) | 1.523(4)   |
| C(14)-C(15) | 1.526(3)   |
| C(14)-H(14) | 1.0000     |

|                  |            |
|------------------|------------|
| C(16)-H(16A)     | 0.9800     |
| C(16)-H(16B)     | 0.9800     |
| C(16)-H(16C)     | 0.9800     |
| C(17)-C(18)      | 1.534(4)   |
| C(17)-H(17A)     | 0.9900     |
| C(17)-H(17B)     | 0.9900     |
| C(18)-H(18A)     | 0.9900     |
| C(18)-H(18B)     | 0.9900     |
| C(19)-H(19A)     | 0.9800     |
| C(19)-H(19B)     | 0.9800     |
| C(19)-H(19C)     | 0.9800     |
| C(20)-H(20A)     | 0.9800     |
| C(20)-H(20B)     | 0.9800     |
| C(20)-H(20C)     | 0.9800     |
| C(21)-C(22)      | 1.384(3)   |
| C(21)-H(21)      | 0.9500     |
| C(22)-H(22)      | 0.9500     |
|                  |            |
| C(6)-Se(1)-C(7)  | 86.96(9)   |
| C(19)-S(1)-C(18) | 101.01(13) |
| C(7)-N(2)-C(8)   | 123.28(17) |
| C(7)-N(2)-H(2)   | 118.4      |
| C(8)-N(2)-H(2)   | 118.4      |
| C(7)-N(1)-C(5)   | 117.25(16) |
| C(7)-N(1)-C(14)  | 118.30(16) |
| C(5)-N(1)-C(14)  | 124.41(17) |
| C(15)-O(1)-C(16) | 113.9(2)   |
| C(2)-C(1)-C(22)  | 121.3(2)   |
| C(2)-C(1)-Br(1)  | 119.58(18) |
| C(22)-C(1)-Br(1) | 119.11(19) |
| C(1)-C(2)-C(3)   | 118.9(2)   |
| C(1)-C(2)-H(2A)  | 120.6      |
| C(3)-C(2)-H(2A)  | 120.6      |
| C(2)-C(3)-C(4)   | 121.4(2)   |
| C(2)-C(3)-H(3)   | 119.3      |
| C(4)-C(3)-H(3)   | 119.3      |
| C(3)-C(4)-C(21)  | 118.3(2)   |
| C(3)-C(4)-C(5)   | 121.1(2)   |
| C(21)-C(4)-C(5)  | 120.6(2)   |
| C(6)-C(5)-N(1)   | 115.37(18) |

|                     |            |
|---------------------|------------|
| C(6)-C(5)-C(4)      | 125.57(17) |
| N(1)-C(5)-C(4)      | 119.01(16) |
| C(5)-C(6)-C(20)     | 129.38(19) |
| C(5)-C(6)-Se(1)     | 111.57(14) |
| C(20)-C(6)-Se(1)    | 118.92(14) |
| N(2)-C(7)-N(1)      | 121.41(17) |
| N(2)-C(7)-Se(1)     | 130.09(16) |
| N(1)-C(7)-Se(1)     | 108.50(13) |
| C(9)-C(8)-C(13)     | 118.5(2)   |
| C(9)-C(8)-N(2)      | 117.9(2)   |
| C(13)-C(8)-N(2)     | 123.6(2)   |
| C(10)-C(9)-C(8)     | 120.5(2)   |
| C(10)-C(9)-H(9)     | 119.7      |
| C(8)-C(9)-H(9)      | 119.7      |
| C(9)-C(10)-C(11)    | 121.1(2)   |
| C(9)-C(10)-H(10)    | 119.4      |
| C(11)-C(10)-H(10)   | 119.4      |
| C(10)-C(11)-C(12)   | 119.0(2)   |
| C(10)-C(11)-H(11)   | 120.5      |
| C(12)-C(11)-H(11)   | 120.5      |
| C(11)-C(12)-C(13)   | 120.8(2)   |
| C(11)-C(12)-H(12)   | 119.6      |
| C(13)-C(12)-H(12)   | 119.6      |
| C(12)-C(13)-C(8)    | 120.0(2)   |
| C(12)-C(13)-H(13)   | 120.0      |
| C(8)-C(13)-H(13)    | 120.0      |
| N(1)-C(14)-C(17)    | 112.1(2)   |
| N(1)-C(14)-C(15)    | 107.76(19) |
| C(17)-C(14)-C(15)   | 117.3(2)   |
| N(1)-C(14)-H(14)    | 106.3      |
| C(17)-C(14)-H(14)   | 106.3      |
| C(15)-C(14)-H(14)   | 106.3      |
| O(2)-C(15)-O(1)     | 124.2(2)   |
| O(2)-C(15)-C(14)    | 124.7(2)   |
| O(1)-C(15)-C(14)    | 111.0(2)   |
| O(1)-C(16)-H(16A)   | 109.5      |
| O(1)-C(16)-H(16B)   | 109.5      |
| H(16A)-C(16)-H(16B) | 109.5      |
| O(1)-C(16)-H(16C)   | 109.5      |
| H(16A)-C(16)-H(16C) | 109.5      |



|                     |            |
|---------------------|------------|
| H(16B)-C(16)-H(16C) | 109.5      |
| C(14)-C(17)-C(18)   | 113.5(2)   |
| C(14)-C(17)-H(17A)  | 108.9      |
| C(18)-C(17)-H(17A)  | 108.9      |
| C(14)-C(17)-H(17B)  | 108.9      |
| C(18)-C(17)-H(17B)  | 108.9      |
| H(17A)-C(17)-H(17B) | 107.7      |
| C(17)-C(18)-S(1)    | 115.57(19) |
| C(17)-C(18)-H(18A)  | 108.4      |
| S(1)-C(18)-H(18A)   | 108.4      |
| C(17)-C(18)-H(18B)  | 108.4      |
| S(1)-C(18)-H(18B)   | 108.4      |
| H(18A)-C(18)-H(18B) | 107.4      |
| S(1)-C(19)-H(19A)   | 109.5      |
| S(1)-C(19)-H(19B)   | 109.5      |
| H(19A)-C(19)-H(19B) | 109.5      |
| S(1)-C(19)-H(19C)   | 109.5      |
| H(19A)-C(19)-H(19C) | 109.5      |
| H(19B)-C(19)-H(19C) | 109.5      |
| C(6)-C(20)-H(20A)   | 109.5      |
| C(6)-C(20)-H(20B)   | 109.5      |
| H(20A)-C(20)-H(20B) | 109.5      |
| C(6)-C(20)-H(20C)   | 109.5      |
| H(20A)-C(20)-H(20C) | 109.5      |
| H(20B)-C(20)-H(20C) | 109.5      |
| C(22)-C(21)-C(4)    | 121.0(2)   |
| C(22)-C(21)-H(21)   | 119.5      |
| C(4)-C(21)-H(21)    | 119.5      |
| C(21)-C(22)-C(1)    | 119.0(2)   |
| C(21)-C(22)-H(22)   | 120.5      |
| C(1)-C(22)-H(22)    | 120.5      |

---

Symmetry transformations used to generate equivalent atoms:

Table 4. Anisotropic displacement parameters ( $\text{\AA}^2 \times 10^3$ ) for mo\_111153lt\_0m. The anisotropic displacement factor exponent takes the form:  $-2\pi^2[ h^2 a^{*2}U^{11} + \dots + 2 h k a^* b^* U^{12} ]$

|       | U <sup>11</sup> | U <sup>22</sup> | U <sup>33</sup> | U <sup>23</sup> | U <sup>13</sup> | U <sup>12</sup> |
|-------|-----------------|-----------------|-----------------|-----------------|-----------------|-----------------|
| Br(1) | 29(1)           | 26(1)           | 18(1)           | 1(1)            | -7(1)           | -3(1)           |
| Se(1) | 17(1)           | 25(1)           | 10(1)           | 1(1)            | 1(1)            | -1(1)           |
| S(1)  | 48(1)           | 27(1)           | 17(1)           | 0(1)            | -3(1)           | 9(1)            |
| N(2)  | 18(1)           | 29(1)           | 10(1)           | -1(1)           | 3(1)            | 1(1)            |
| O(2)  | 29(1)           | 21(1)           | 21(1)           | 2(1)            | 4(1)            | 2(1)            |
| N(1)  | 14(1)           | 26(1)           | 11(1)           | 2(1)            | 1(1)            | 2(1)            |
| O(1)  | 22(1)           | 29(1)           | 27(1)           | 1(1)            | 12(1)           | 5(1)            |
| C(1)  | 20(1)           | 19(1)           | 12(1)           | 0(1)            | -2(1)           | -2(1)           |
| C(2)  | 21(1)           | 20(1)           | 17(1)           | -6(1)           | 3(1)            | -3(1)           |
| C(3)  | 16(1)           | 17(1)           | 19(1)           | 0(1)            | 3(1)            | 2(1)            |
| C(4)  | 16(1)           | 15(1)           | 13(1)           | 1(1)            | 3(1)            | -2(1)           |
| C(5)  | 17(1)           | 12(1)           | 17(1)           | 0(1)            | 1(1)            | 2(1)            |
| C(6)  | 19(1)           | 14(1)           | 14(1)           | 0(1)            | 0(1)            | -4(1)           |
| C(7)  | 20(1)           | 18(1)           | 12(1)           | -1(1)           | 1(1)            | 0(1)            |
| C(8)  | 15(1)           | 17(1)           | 16(1)           | 3(1)            | 3(1)            | -6(1)           |
| C(9)  | 16(1)           | 25(1)           | 18(1)           | -4(1)           | 5(1)            | -3(1)           |
| C(10) | 15(1)           | 23(1)           | 24(1)           | 0(1)            | 4(1)            | 0(1)            |
| C(11) | 16(1)           | 25(2)           | 21(1)           | 5(1)            | -1(1)           | -3(1)           |
| C(12) | 22(1)           | 26(2)           | 17(1)           | -1(1)           | 2(1)            | -4(1)           |
| C(13) | 18(1)           | 19(1)           | 18(1)           | 0(1)            | 4(1)            | -1(1)           |
| C(14) | 17(1)           | 22(2)           | 10(1)           | 1(1)            | 1(1)            | 2(1)            |
| C(15) | 15(1)           | 32(2)           | 9(1)            | 0(1)            | -1(1)           | 0(1)            |
| C(16) | 34(2)           | 36(2)           | 46(2)           | 5(2)            | 20(2)           | 14(1)           |
| C(17) | 25(2)           | 24(2)           | 17(2)           | -1(1)           | 2(1)            | 1(1)            |
| C(18) | 35(2)           | 24(2)           | 21(1)           | 5(1)            | 9(1)            | 2(1)            |
| C(19) | 41(2)           | 26(2)           | 33(2)           | 1(1)            | 6(1)            | 8(1)            |
| C(20) | 19(1)           | 24(1)           | 17(1)           | -1(1)           | 4(1)            | 2(1)            |
| C(21) | 24(1)           | 16(1)           | 14(1)           | -2(1)           | -1(1)           | 2(1)            |
| C(22) | 24(1)           | 20(1)           | 21(1)           | 0(1)            | -1(1)           | 4(1)            |

Table 5. Hydrogen coordinates ( $\times 10^4$ ) and isotropic displacement parameters ( $\text{\AA}^2 \times 10^{-3}$ ) for mo\_111153lt\_0m.

|        | x     | y    | z     | U(eq) |
|--------|-------|------|-------|-------|
| H(2)   | 2480  | 3655 | 8666  | 23    |
| H(2A)  | -2803 | 1490 | 5668  | 23    |
| H(3)   | -1324 | 1571 | 7157  | 21    |
| H(9)   | 4162  | 1744 | 9466  | 23    |
| H(10)  | 5703  | 1373 | 10870 | 25    |
| H(11)  | 5776  | 3029 | 12400 | 25    |
| H(12)  | 4247  | 5048 | 12527 | 26    |
| H(13)  | 2654  | 5400 | 11139 | 22    |
| H(14)  | -92   | 4084 | 6959  | 20    |
| H(16A) | 2587  | 711  | 6089  | 56    |
| H(16B) | 3360  | 901  | 7240  | 56    |
| H(16C) | 3753  | 1937 | 6267  | 56    |
| H(17A) | 2078  | 5886 | 7684  | 26    |
| H(17B) | 809   | 6794 | 7735  | 26    |
| H(18A) | 1659  | 5694 | 5851  | 31    |
| H(18B) | 1482  | 7670 | 6185  | 31    |
| H(19A) | -576  | 9180 | 6197  | 50    |
| H(19B) | -1181 | 7693 | 6814  | 50    |
| H(19C) | -1864 | 8404 | 5708  | 50    |
| H(20A) | -2242 | 2591 | 10522 | 29    |
| H(20B) | -2901 | 3878 | 9633  | 29    |
| H(20C) | -2219 | 4650 | 10723 | 29    |
| H(21)  | -2818 | 5929 | 8161  | 22    |
| H(22)  | -4344 | 5803 | 6704  | 26    |

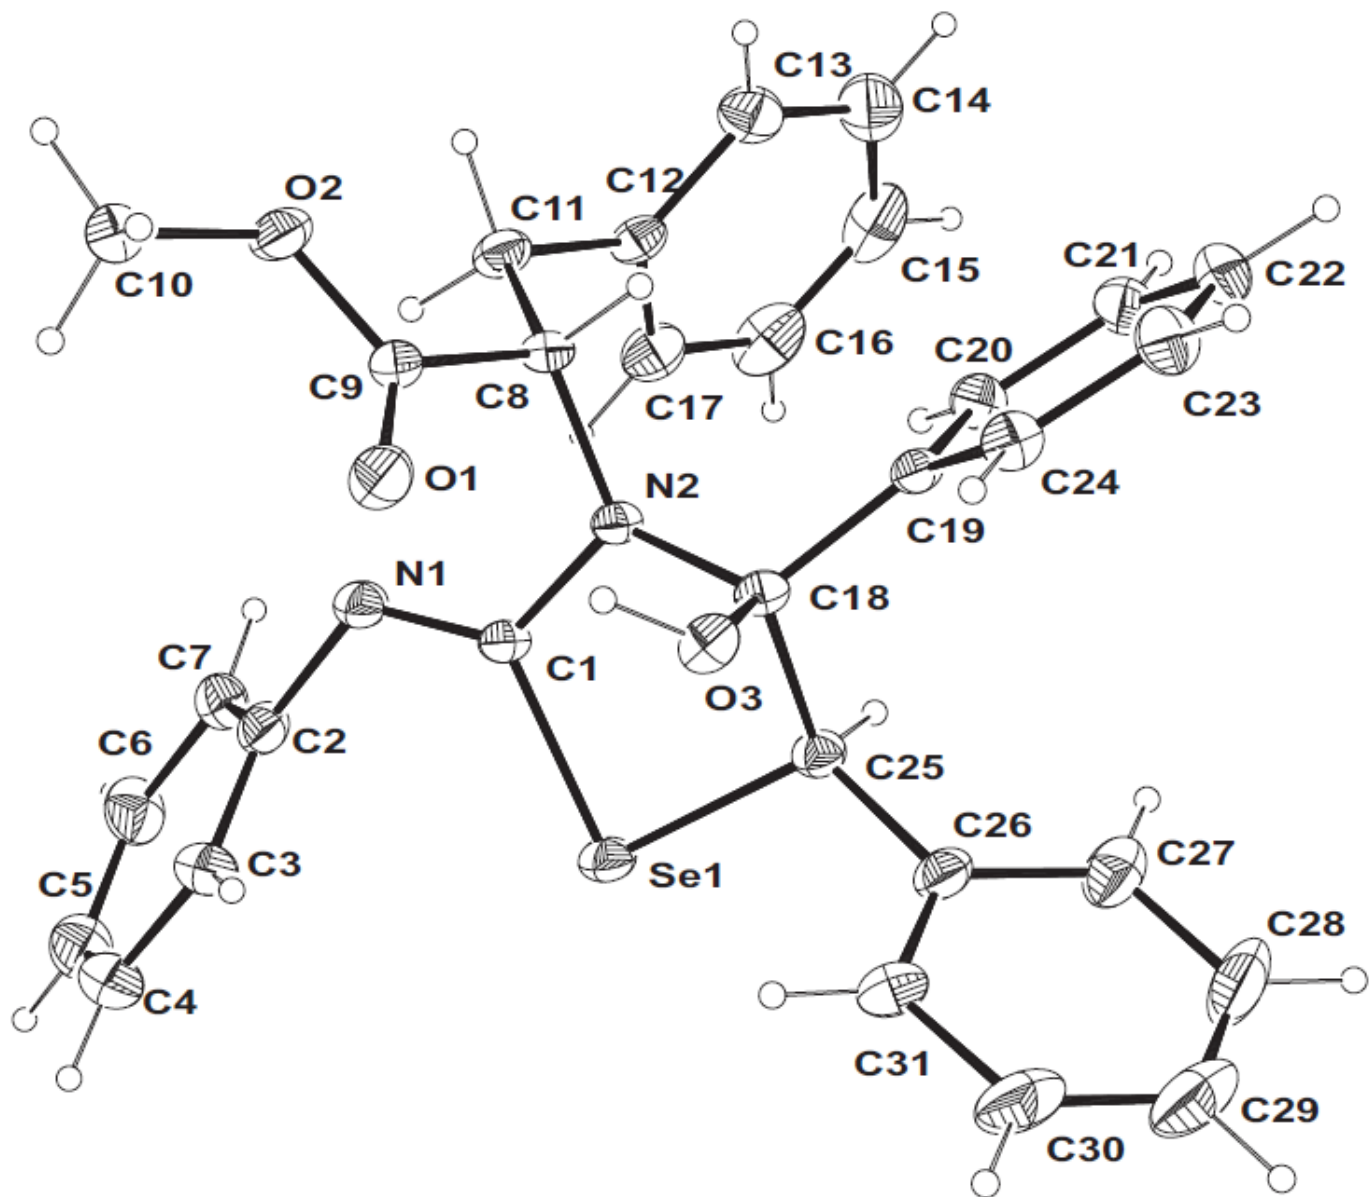

X-Ray ORTEP diagram of 2-iminoselenazole 9b

Table 1. Crystal data and structure refinement for ch13732. C10(60%), C10'(40%) disorder

|                                   |                                                                  |                 |
|-----------------------------------|------------------------------------------------------------------|-----------------|
| Identification code               | ch13732                                                          |                 |
| Empirical formula                 | C <sub>31</sub> H <sub>28</sub> N <sub>2</sub> O <sub>3</sub> Se |                 |
| Formula weight                    | 555.51                                                           |                 |
| Temperature                       | 298(2) K                                                         |                 |
| Wavelength                        | 0.71073 Å                                                        |                 |
| Crystal system                    | Monoclinic                                                       |                 |
| Space group                       | P 21                                                             |                 |
| Unit cell dimensions              | a = 8.6504(3) Å                                                  | α = 90°.        |
|                                   | b = 9.7776(4) Å                                                  | β = 98.688(2)°. |
|                                   | c = 16.3783(6) Å                                                 | γ = 90°.        |
| Volume                            | 1369.38(9) Å <sup>3</sup>                                        |                 |
| Z                                 | 2                                                                |                 |
| Density (calculated)              | 1.347 Mg/m <sup>3</sup>                                          |                 |
| Absorption coefficient            | 1.405 mm <sup>-1</sup>                                           |                 |
| F(000)                            | 572                                                              |                 |
| Crystal size                      | 0.74 x 0.46 x 0.33 mm <sup>3</sup>                               |                 |
| Theta range for data collection   | 1.26 to 25.19°.                                                  |                 |
| Index ranges                      | -10 ≤ h ≤ 10, -11 ≤ k ≤ 11, -19 ≤ l ≤ 17                         |                 |
| Reflections collected             | 9454                                                             |                 |
| Independent reflections           | 4712 [R(int) = 0.0241]                                           |                 |
| Completeness to theta = 25.19°    | 98.3 %                                                           |                 |
| Absorption correction             | multi-scan                                                       |                 |
| Max. and min. transmission        | 0.6542 and 0.4228                                                |                 |
| Refinement method                 | Full-matrix least-squares on F <sup>2</sup>                      |                 |
| Data / restraints / parameters    | 4712 / 1 / 334                                                   |                 |
| Goodness-of-fit on F <sup>2</sup> | 1.082                                                            |                 |
| Final R indices [I > 2σ(I)]       | R1 = 0.0304, wR2 = 0.0683                                        |                 |
| R indices (all data)              | R1 = 0.0392, wR2 = 0.0730                                        |                 |
| Absolute structure parameter      | 0.014(8)                                                         |                 |
| Largest diff. peak and hole       | 0.286 and -0.289 e.Å <sup>-3</sup>                               |                 |

Table 2. Atomic coordinates ( $\times 10^4$ ) and equivalent isotropic displacement parameters ( $\text{\AA}^2 \times 10^3$ ) for ch13732.  $U(\text{eq})$  is defined as one third of the trace of the orthogonalized  $U^{ij}$  tensor.

|        | x        | y         | z        | U(eq)  |
|--------|----------|-----------|----------|--------|
| C(1)   | 7424(3)  | 10811(4)  | 7931(2)  | 37(1)  |
| C(2)   | 7870(3)  | 12648(4)  | 8819(2)  | 48(1)  |
| C(3)   | 8712(4)  | 13595(4)  | 8444(3)  | 62(1)  |
| C(4)   | 9665(4)  | 14522(5)  | 8928(3)  | 79(1)  |
| C(5)   | 9772(5)  | 14471(5)  | 9783(3)  | 80(1)  |
| C(6)   | 8912(5)  | 13555(5)  | 10149(3) | 71(1)  |
| C(7)   | 7946(4)  | 12652(4)  | 9678(2)  | 56(1)  |
| C(8)   | 4817(3)  | 9913(3)   | 7428(2)  | 37(1)  |
| C(9)   | 4294(3)  | 11273(3)  | 7027(2)  | 44(1)  |
| C(10)  | 2393(7)  | 13042(6)  | 6969(4)  | 47(2)  |
| C(10') | 2196(11) | 12797(11) | 6596(6)  | 54(3)  |
| C(11)  | 4176(3)  | 9646(4)   | 8246(2)  | 49(1)  |
| C(12)  | 4640(3)  | 8306(4)   | 8642(2)  | 45(1)  |
| C(13)  | 3785(4)  | 7133(4)   | 8425(2)  | 62(1)  |
| C(14)  | 4248(5)  | 5886(5)   | 8799(3)  | 81(1)  |
| C(15)  | 5578(6)  | 5832(6)   | 9385(3)  | 88(2)  |
| C(16)  | 6412(5)  | 6991(6)   | 9599(3)  | 83(1)  |
| C(17)  | 5970(4)  | 8210(4)   | 9235(2)  | 62(1)  |
| C(18)  | 7227(3)  | 9151(3)   | 6826(2)  | 37(1)  |
| C(19)  | 6556(3)  | 7753(3)   | 6579(2)  | 37(1)  |
| C(20)  | 6470(3)  | 6738(4)   | 7167(2)  | 48(1)  |
| C(21)  | 5992(4)  | 5437(4)   | 6930(2)  | 57(1)  |
| C(22)  | 5607(4)  | 5119(4)   | 6095(2)  | 60(1)  |
| C(23)  | 5692(4)  | 6109(4)   | 5526(2)  | 60(1)  |
| C(24)  | 6162(3)  | 7409(4)   | 5758(2)  | 46(1)  |
| C(25)  | 8989(3)  | 8954(3)   | 7173(2)  | 41(1)  |
| C(26)  | 10006(3) | 8612(4)   | 6532(2)  | 51(1)  |
| C(27)  | 10528(4) | 7292(5)   | 6464(3)  | 71(1)  |
| C(28)  | 11436(6) | 6951(7)   | 5860(4)  | 102(2) |
| C(29)  | 11811(6) | 7909(8)   | 5331(4)  | 103(2) |
| C(30)  | 11287(5) | 9206(7)   | 5375(3)  | 92(2)  |
| C(31)  | 10406(4) | 9580(5)   | 5978(2)  | 66(1)  |
| N(1)   | 6856(3)  | 11687(3)  | 8358(2)  | 48(1)  |
| N(2)   | 6530(2)  | 9787(3)   | 7498(2)  | 35(1)  |
| O(1)   | 4955(3)  | 11861(3)  | 6539(2)  | 59(1)  |

|       |         |          |         |       |
|-------|---------|----------|---------|-------|
| O(2)  | 2969(2) | 11720(3) | 7257(2) | 65(1) |
| O(3)  | 7089(2) | 10015(2) | 6135(1) | 45(1) |
| Se(1) | 9588(1) | 10637(1) | 7798(1) | 47(1) |

---

Table 3. Bond lengths [ $\text{\AA}$ ] and angles [ $^\circ$ ] for ch13732.

---

|               |           |
|---------------|-----------|
| C(1)-N(1)     | 1.252(4)  |
| C(1)-N(2)     | 1.391(4)  |
| C(1)-Se(1)    | 1.925(3)  |
| C(2)-C(3)     | 1.379(5)  |
| C(2)-C(7)     | 1.398(5)  |
| C(2)-N(1)     | 1.423(4)  |
| C(3)-C(4)     | 1.390(5)  |
| C(3)-H(3)     | 0.9300    |
| C(4)-C(5)     | 1.391(6)  |
| C(4)-H(4)     | 0.9300    |
| C(5)-C(6)     | 1.360(6)  |
| C(5)-H(5)     | 0.9300    |
| C(6)-C(7)     | 1.370(5)  |
| C(6)-H(6)     | 0.9300    |
| C(7)-H(7)     | 0.9300    |
| C(8)-N(2)     | 1.474(3)  |
| C(8)-C(9)     | 1.522(4)  |
| C(8)-C(11)    | 1.547(5)  |
| C(8)-H(8)     | 0.9800    |
| C(9)-O(1)     | 1.198(4)  |
| C(9)-O(2)     | 1.332(4)  |
| C(10)-O(2)    | 1.439(6)  |
| C(10)-H(10A)  | 0.9600    |
| C(10)-H(10B)  | 0.9600    |
| C(10)-H(10C)  | 0.9600    |
| C(10')-O(2)   | 1.585(10) |
| C(10')-H(10D) | 0.9600    |
| C(10')-H(10E) | 0.9600    |
| C(10')-H(10F) | 0.9600    |
| C(11)-C(12)   | 1.490(5)  |
| C(11)-H(11A)  | 0.9700    |
| C(11)-H(11B)  | 0.9700    |
| C(12)-C(13)   | 1.382(5)  |
| C(12)-C(17)   | 1.392(5)  |
| C(13)-C(14)   | 1.395(6)  |
| C(13)-H(13)   | 0.9300    |
| C(14)-C(15)   | 1.384(6)  |
| C(14)-H(14)   | 0.9300    |



|                 |          |
|-----------------|----------|
| C(15)-C(16)     | 1.360(7) |
| C(15)-H(15)     | 0.9300   |
| C(16)-C(17)     | 1.362(6) |
| C(16)-H(16)     | 0.9300   |
| C(17)-H(17)     | 0.9300   |
| C(18)-O(3)      | 1.402(3) |
| C(18)-N(2)      | 1.471(4) |
| C(18)-C(19)     | 1.517(4) |
| C(18)-C(25)     | 1.556(4) |
| C(19)-C(24)     | 1.378(4) |
| C(19)-C(20)     | 1.393(5) |
| C(20)-C(21)     | 1.376(6) |
| C(20)-H(20)     | 0.9300   |
| C(21)-C(22)     | 1.393(5) |
| C(21)-H(21)     | 0.9300   |
| C(22)-C(23)     | 1.354(5) |
| C(22)-H(22)     | 0.9300   |
| C(23)-C(24)     | 1.371(5) |
| C(23)-H(23)     | 0.9300   |
| C(24)-H(24)     | 0.9300   |
| C(25)-C(26)     | 1.506(4) |
| C(25)-Se(1)     | 1.966(3) |
| C(25)-H(25)     | 0.9800   |
| C(26)-C(27)     | 1.377(5) |
| C(26)-C(31)     | 1.390(5) |
| C(27)-C(28)     | 1.393(6) |
| C(27)-H(27)     | 0.9300   |
| C(28)-C(29)     | 1.349(7) |
| C(28)-H(28)     | 0.9300   |
| C(29)-C(30)     | 1.352(8) |
| C(29)-H(29)     | 0.9300   |
| C(30)-C(31)     | 1.384(6) |
| C(30)-H(30)     | 0.9300   |
| C(31)-H(31)     | 0.9300   |
| O(3)-H(3')      | 0.8608   |
|                 |          |
| N(1)-C(1)-N(2)  | 122.8(2) |
| N(1)-C(1)-Se(1) | 126.4(2) |
| N(2)-C(1)-Se(1) | 110.7(2) |
| C(3)-C(2)-C(7)  | 120.0(3) |

|                      |          |
|----------------------|----------|
| C(3)-C(2)-N(1)       | 122.1(3) |
| C(7)-C(2)-N(1)       | 117.9(3) |
| C(2)-C(3)-C(4)       | 119.4(4) |
| C(2)-C(3)-H(3)       | 120.3    |
| C(4)-C(3)-H(3)       | 120.3    |
| C(5)-C(4)-C(3)       | 119.7(4) |
| C(5)-C(4)-H(4)       | 120.2    |
| C(3)-C(4)-H(4)       | 120.2    |
| C(6)-C(5)-C(4)       | 120.6(4) |
| C(6)-C(5)-H(5)       | 119.7    |
| C(4)-C(5)-H(5)       | 119.7    |
| C(5)-C(6)-C(7)       | 120.3(4) |
| C(5)-C(6)-H(6)       | 119.8    |
| C(7)-C(6)-H(6)       | 119.8    |
| C(6)-C(7)-C(2)       | 120.0(4) |
| C(6)-C(7)-H(7)       | 120.0    |
| C(2)-C(7)-H(7)       | 120.0    |
| N(2)-C(8)-C(9)       | 109.7(2) |
| N(2)-C(8)-C(11)      | 113.9(2) |
| C(9)-C(8)-C(11)      | 113.5(3) |
| N(2)-C(8)-H(8)       | 106.4    |
| C(9)-C(8)-H(8)       | 106.4    |
| C(11)-C(8)-H(8)      | 106.4    |
| O(1)-C(9)-O(2)       | 123.3(3) |
| O(1)-C(9)-C(8)       | 124.5(3) |
| O(2)-C(9)-C(8)       | 112.1(3) |
| O(2)-C(10)-H(10A)    | 109.5    |
| O(2)-C(10)-H(10B)    | 109.5    |
| H(10A)-C(10)-H(10B)  | 109.5    |
| O(2)-C(10)-H(10C)    | 109.5    |
| H(10A)-C(10)-H(10C)  | 109.5    |
| H(10B)-C(10)-H(10C)  | 109.5    |
| O(2)-C(10')-H(10D)   | 109.5    |
| O(2)-C(10')-H(10E)   | 109.5    |
| H(10D)-C(10')-H(10E) | 109.5    |
| O(2)-C(10')-H(10F)   | 109.5    |
| H(10D)-C(10')-H(10F) | 109.5    |
| H(10E)-C(10')-H(10F) | 109.5    |
| C(12)-C(11)-C(8)     | 114.7(3) |
| C(12)-C(11)-H(11A)   | 108.6    |

|                     |          |
|---------------------|----------|
| C(8)-C(11)-H(11A)   | 108.6    |
| C(12)-C(11)-H(11B)  | 108.6    |
| C(8)-C(11)-H(11B)   | 108.6    |
| H(11A)-C(11)-H(11B) | 107.6    |
| C(13)-C(12)-C(17)   | 118.5(4) |
| C(13)-C(12)-C(11)   | 121.3(3) |
| C(17)-C(12)-C(11)   | 120.2(3) |
| C(12)-C(13)-C(14)   | 120.4(4) |
| C(12)-C(13)-H(13)   | 119.8    |
| C(14)-C(13)-H(13)   | 119.8    |
| C(15)-C(14)-C(13)   | 119.4(5) |
| C(15)-C(14)-H(14)   | 120.3    |
| C(13)-C(14)-H(14)   | 120.3    |
| C(16)-C(15)-C(14)   | 120.0(5) |
| C(16)-C(15)-H(15)   | 120.0    |
| C(14)-C(15)-H(15)   | 120.0    |
| C(15)-C(16)-C(17)   | 120.9(4) |
| C(15)-C(16)-H(16)   | 119.5    |
| C(17)-C(16)-H(16)   | 119.5    |
| C(16)-C(17)-C(12)   | 120.8(4) |
| C(16)-C(17)-H(17)   | 119.6    |
| C(12)-C(17)-H(17)   | 119.6    |
| O(3)-C(18)-N(2)     | 110.8(2) |
| O(3)-C(18)-C(19)    | 110.2(2) |
| N(2)-C(18)-C(19)    | 113.4(2) |
| O(3)-C(18)-C(25)    | 109.2(2) |
| N(2)-C(18)-C(25)    | 105.6(2) |
| C(19)-C(18)-C(25)   | 107.5(2) |
| C(24)-C(19)-C(20)   | 118.1(3) |
| C(24)-C(19)-C(18)   | 120.6(3) |
| C(20)-C(19)-C(18)   | 121.1(3) |
| C(21)-C(20)-C(19)   | 120.5(3) |
| C(21)-C(20)-H(20)   | 119.7    |
| C(19)-C(20)-H(20)   | 119.7    |
| C(20)-C(21)-C(22)   | 120.1(4) |
| C(20)-C(21)-H(21)   | 120.0    |
| C(22)-C(21)-H(21)   | 120.0    |
| C(23)-C(22)-C(21)   | 119.1(3) |
| C(23)-C(22)-H(22)   | 120.4    |
| C(21)-C(22)-H(22)   | 120.4    |

|                   |           |
|-------------------|-----------|
| C(22)-C(23)-C(24) | 121.1(3)  |
| C(22)-C(23)-H(23) | 119.4     |
| C(24)-C(23)-H(23) | 119.4     |
| C(23)-C(24)-C(19) | 121.1(3)  |
| C(23)-C(24)-H(24) | 119.5     |
| C(19)-C(24)-H(24) | 119.5     |
| C(26)-C(25)-C(18) | 114.6(3)  |
| C(26)-C(25)-Se(1) | 114.4(2)  |
| C(18)-C(25)-Se(1) | 104.7(2)  |
| C(26)-C(25)-H(25) | 107.6     |
| C(18)-C(25)-H(25) | 107.6     |
| Se(1)-C(25)-H(25) | 107.6     |
| C(27)-C(26)-C(31) | 117.9(4)  |
| C(27)-C(26)-C(25) | 119.8(4)  |
| C(31)-C(26)-C(25) | 122.2(3)  |
| C(26)-C(27)-C(28) | 120.5(5)  |
| C(26)-C(27)-H(27) | 119.7     |
| C(28)-C(27)-H(27) | 119.7     |
| C(29)-C(28)-C(27) | 120.4(5)  |
| C(29)-C(28)-H(28) | 119.8     |
| C(27)-C(28)-H(28) | 119.8     |
| C(28)-C(29)-C(30) | 120.1(5)  |
| C(28)-C(29)-H(29) | 120.0     |
| C(30)-C(29)-H(29) | 120.0     |
| C(29)-C(30)-C(31) | 120.8(5)  |
| C(29)-C(30)-H(30) | 119.6     |
| C(31)-C(30)-H(30) | 119.6     |
| C(30)-C(31)-C(26) | 120.2(5)  |
| C(30)-C(31)-H(31) | 119.9     |
| C(26)-C(31)-H(31) | 119.9     |
| C(1)-N(1)-C(2)    | 119.1(3)  |
| C(1)-N(2)-C(18)   | 115.2(2)  |
| C(1)-N(2)-C(8)    | 117.0(2)  |
| C(18)-N(2)-C(8)   | 119.8(2)  |
| C(9)-O(2)-C(10)   | 118.1(3)  |
| C(9)-O(2)-C(10')  | 108.5(4)  |
| C(10)-O(2)-C(10') | 24.4(4)   |
| C(18)-O(3)-H(3')  | 108.0     |
| C(1)-Se(1)-C(25)  | 87.03(14) |

Symmetry transformations used to generate equivalent atoms:

Table 4. Anisotropic displacement parameters ( $\text{\AA}^2 \times 10^3$ ) for ch13732. The anisotropic displacement factor exponent takes the form:  $-2\pi^2 [ h^2 a^{*2} U^{11} + \dots + 2 h k a^* b^* U^{12} ]$

|       | U <sup>11</sup> | U <sup>22</sup> | U <sup>33</sup> | U <sup>23</sup> | U <sup>13</sup> | U <sup>12</sup> |
|-------|-----------------|-----------------|-----------------|-----------------|-----------------|-----------------|
| C(1)  | 30(1)           | 44(2)           | 38(2)           | -1(2)           | 7(1)            | -5(2)           |
| C(2)  | 38(2)           | 54(2)           | 52(2)           | -14(2)          | 3(2)            | 4(2)            |
| C(3)  | 52(2)           | 60(3)           | 75(3)           | -6(2)           | 15(2)           | -13(2)          |
| C(4)  | 63(2)           | 64(3)           | 113(4)          | -17(3)          | 21(2)           | -18(2)          |
| C(5)  | 63(2)           | 75(3)           | 97(4)           | -32(3)          | -8(2)           | -7(2)           |
| C(6)  | 75(3)           | 69(3)           | 64(3)           | -20(2)          | -8(2)           | -1(2)           |
| C(7)  | 55(2)           | 52(2)           | 59(3)           | -10(2)          | 7(2)            | -2(2)           |
| C(8)  | 28(2)           | 44(2)           | 40(2)           | 2(2)            | 8(1)            | -4(1)           |
| C(9)  | 32(2)           | 42(2)           | 56(2)           | -5(2)           | 3(2)            | -1(1)           |
| C(11) | 38(2)           | 56(2)           | 57(2)           | 6(2)            | 18(2)           | 1(2)            |
| C(12) | 39(2)           | 58(2)           | 41(2)           | 5(2)            | 20(2)           | 2(2)            |
| C(13) | 63(2)           | 63(3)           | 64(3)           | 10(2)           | 23(2)           | -9(2)           |
| C(14) | 97(3)           | 68(4)           | 90(3)           | 2(3)            | 47(3)           | -11(3)          |
| C(15) | 108(3)          | 79(4)           | 88(3)           | 34(3)           | 52(3)           | 36(3)           |
| C(16) | 79(3)           | 108(4)          | 63(3)           | 23(3)           | 14(2)           | 30(3)           |
| C(17) | 57(2)           | 79(3)           | 53(2)           | 4(2)            | 14(2)           | 6(2)            |
| C(18) | 29(1)           | 46(2)           | 35(2)           | 3(2)            | 4(1)            | -1(1)           |
| C(19) | 29(1)           | 43(2)           | 41(2)           | -1(2)           | 8(1)            | 0(1)            |
| C(20) | 50(2)           | 53(2)           | 41(2)           | -2(2)           | 9(2)            | -3(2)           |
| C(21) | 60(2)           | 49(3)           | 63(2)           | 6(2)            | 20(2)           | -9(2)           |
| C(22) | 60(2)           | 54(3)           | 65(3)           | -18(2)          | 11(2)           | -10(2)          |
| C(23) | 66(2)           | 72(3)           | 41(2)           | -18(2)          | 2(2)            | -7(2)           |
| C(24) | 47(2)           | 58(2)           | 32(2)           | 2(2)            | 5(2)            | 0(2)            |
| C(25) | 31(1)           | 45(2)           | 45(2)           | 2(2)            | 3(1)            | 2(1)            |
| C(26) | 33(2)           | 64(3)           | 58(2)           | -11(2)          | 9(2)            | 2(2)            |
| C(27) | 59(2)           | 76(3)           | 79(3)           | -4(2)           | 11(2)           | 21(2)           |
| C(28) | 83(3)           | 108(5)          | 117(4)          | -37(4)          | 27(3)           | 38(3)           |
| C(29) | 72(3)           | 152(6)          | 94(4)           | -18(4)          | 41(3)           | 17(4)           |
| C(30) | 68(3)           | 130(5)          | 87(3)           | -2(3)           | 45(2)           | -4(3)           |
| C(31) | 54(2)           | 76(3)           | 75(3)           | -1(2)           | 33(2)           | -6(2)           |
| N(1)  | 35(1)           | 53(2)           | 55(2)           | -14(2)          | 7(1)            | -5(1)           |
| N(2)  | 28(1)           | 42(2)           | 36(2)           | -1(1)           | 5(1)            | -2(1)           |
| O(1)  | 60(1)           | 52(2)           | 70(2)           | 18(1)           | 25(1)           | 8(1)            |
| O(2)  | 38(1)           | 51(2)           | 109(2)          | 21(2)           | 23(1)           | 8(1)            |
| O(3)  | 46(1)           | 51(1)           | 39(1)           | 13(1)           | 10(1)           | 9(1)            |

Se(1)    28(1)    56(1)    56(1)    -7(1)    5(1)    -4(1)

---

Table 5. Hydrogen coordinates ( $\times 10^4$ ) and isotropic displacement parameters ( $\text{\AA}^2 \times 10^3$ ) for ch13732.

|        | x     | y     | z     | U(eq) |
|--------|-------|-------|-------|-------|
| H(3)   | 8643  | 13613 | 7872  | 74    |
| H(4)   | 10229 | 15172 | 8681  | 95    |
| H(5)   | 10438 | 15070 | 10109 | 96    |
| H(6)   | 8980  | 13541 | 10721 | 85    |
| H(7)   | 7341  | 12041 | 9930  | 67    |
| H(8)   | 4374  | 9200  | 7042  | 44    |
| H(10A) | 1436  | 13233 | 7177  | 71    |
| H(10B) | 2204  | 13047 | 6376  | 71    |
| H(10C) | 3155  | 13728 | 7162  | 71    |
| H(10D) | 1237  | 13127 | 6753  | 82    |
| H(10E) | 1982  | 12368 | 6064  | 82    |
| H(10F) | 2900  | 13550 | 6571  | 82    |
| H(11A) | 4538  | 10371 | 8632  | 59    |
| H(11B) | 3043  | 9693  | 8138  | 59    |
| H(13)  | 2897  | 7174  | 8028  | 75    |
| H(14)  | 3667  | 5098  | 8655  | 98    |
| H(15)  | 5903  | 5004  | 9632  | 105   |
| H(16)  | 7295  | 6950  | 10000 | 100   |
| H(17)  | 6564  | 8989  | 9385  | 75    |
| H(20)  | 6739  | 6942  | 7725  | 57    |
| H(21)  | 5925  | 4769  | 7327  | 68    |
| H(22)  | 5295  | 4238  | 5931  | 72    |
| H(23)  | 5427  | 5904  | 4968  | 72    |
| H(24)  | 6216  | 8069  | 5355  | 55    |
| H(25)  | 9069  | 8196  | 7568  | 49    |
| H(27)  | 10272 | 6623  | 6825  | 85    |
| H(28)  | 11785 | 6057  | 5822  | 122   |
| H(29)  | 12431 | 7677  | 4934  | 123   |
| H(30)  | 11522 | 9854  | 4997  | 110   |
| H(31)  | 10080 | 10481 | 6012  | 79    |
| H(3')  | 6450  | 10663 | 6209  | 53    |



**Reference:**

1. López, Ó.; Maza, S.; Ulgar, V.; Maya, I.; Fernández-Bolaños, J. *Tetrahedron*. **2009**, *65*, 2556-2566.
2. Galina, K.; Jaroslav, R.; Zdeňka, P.; Zdeněk, N.; Kateřina, V.; Alexandr, H. *Tetrahedron*. **2013**, *69*, 8798-8808.
